# Supplementary material for: Crosslinking mass spectrometry unveils novel interactions and structural distinctions in the model green alga Chlamydomonas reinhardtii
Source: Royal Society of Chemistry journal article supplement (doi:10.1039/d1mo00197c), 2021-09-06
Supplement: d1mo00197c1.xlsx [file d1mo00197c1.xlsx]

## Sheet: Table S1 - Cr Crosslinks
Table S1. Identified unique crosslinks in C. reinhardtii.
Crosslink Type	Leading Accession A	Leading Accession B	Leading Protein Description A	Leading Protein Description B	Protein Position A	Protein Position B	Peptide Sequence A	Modifications A	Peptide Sequence B	Modifications B	Max. XlinkX Score	ΔXlinkX Score	# CSMs	Unambigious Match?	UniProt Accession A	UniProt Accession B	Protein A: Gene ontology (biological process)	Protein A: Gene ontology (cellular component)	Protein A: Gene ontology (molecular function)	Protein B: Gene ontology (biological process)	Protein B: Gene ontology (cellular component)	Protein B: Gene ontology (molecular function)	Spectrum File	Scan
Inter	Cre11.g468550.t1.2	Cre17.g734500.t1.2	Vacuolar ATP synthase subunit G	Vacuolar ATP synthase subunit E	85	85	LQSETGLAVQKIQADVK	1×DSSO [K11]	VLAAKEAAVQDIITDAK	1×DSSO [K5]	214.64	152.96	4	TRUE	A8JC42	A8IW47	proton transmembrane transport [GO:1902600]	integral component of membrane [GO:0016021]; vacuolar proton-transporting V-type ATPase complex [GO:0016471]	ATPase-coupled transmembrane transporter activity [GO:0042626]; hydrolase activity [GO:0016787]	NA	proton-transporting two-sector ATPase complex, catalytic domain [GO:0033178]	proton-exporting ATPase activity, phosphorylative mechanism [GO:0008553]; proton-transporting ATPase activity, rotational mechanism [GO:0046961]	20210409_ALS_XL_F44.raw	43741
Intra	Cre04.g222700.t1.2	Cre04.g222700.t1.2	Elongation Factor 3 and ABC transporter	Elongation Factor 3 and ABC transporter	19	364	IEEVSSKIAELPESK	1×DSSO [K7]	TLHDLLAATAEGKK	1×DSSO [K13]	203.19	173.04	1	TRUE	A8ISZ1	A8ISZ1	NA	NA	ATPase activity [GO:0016887]; ATP binding [GO:0005524]; translation elongation factor activity [GO:0003746]	NA	NA	ATPase activity [GO:0016887]; ATP binding [GO:0005524]; translation elongation factor activity [GO:0003746]	20210409_ALS_XL_F57.raw	38246
Intra	Cre12.g559250.t1.2	Cre12.g559250.t1.2	14-3-3 protein	14-3-3 protein	29	33	LAEQAERYDEMVEEMKK	2×Oxidation [M11; M15]; 1×DSSO [K16]	VAKLVHDQELSVEER	1×DSSO [K3]	201.39	164.88	1	TRUE	A8JGV6	A8JGV6	NA	NA	phospholipase A2 activity [GO:0004623]; phospholipase A2 activity (consuming 1,2-dipalmitoylphosphatidylcholine) [GO:0102567]; phospholipase A2 activity consuming 1,2-dioleoylphosphatidylethanolamine) [GO:0102568]	NA	NA	phospholipase A2 activity [GO:0004623]; phospholipase A2 activity (consuming 1,2-dipalmitoylphosphatidylcholine) [GO:0102567]; phospholipase A2 activity consuming 1,2-dioleoylphosphatidylethanolamine) [GO:0102568]	20210409_ALS_XL_F59.raw	25531
Intra	gi|41179007|ref|NP_958362.1|	gi|41179007|ref|NP_958362.1|	elongation factor Tu (chloroplast)	elongation factor Tu (chloroplast)	492	475	GITINTAHVEYETEKR	1×DSSO [K15]	KYDEIDSAPEEKAR	1×DSSO [K12]	200.12	158.33	4	TRUE	P17746	P17746	NA	NA	NA	NA	NA	NA	20210409_ALS_XL_F60.raw	25548
Intra	Cre06.g249750.t1.1	Cre06.g249750.t1.1	(1 of 1) PF07382//PF13374 - Histone H1-like nucleoprotein HC2 (HC2) // Tetratricopeptide repeat (TPR_10)	(1 of 1) PF07382//PF13374 - Histone H1-like nucleoprotein HC2 (HC2) // Tetratricopeptide repeat (TPR_10)	111	316	AAAEKAAADNAAAEK	1×DSSO [K5]	AAAEKAAAEK	1×DSSO [K5]	185.69	33.28	1	TRUE	A0A2K3DLW7	A0A2K3DLW7	chromosome condensation [GO:0030261]	NA	DNA binding [GO:0003677]	chromosome condensation [GO:0030261]	NA	DNA binding [GO:0003677]	20210409_ALS_XL_F53.raw	10259
Intra	Cre06.g249750.t1.1	Cre06.g249750.t1.1	(1 of 1) PF07382//PF13374 - Histone H1-like nucleoprotein HC2 (HC2) // Tetratricopeptide repeat (TPR_10)	(1 of 1) PF07382//PF13374 - Histone H1-like nucleoprotein HC2 (HC2) // Tetratricopeptide repeat (TPR_10)	121	316	AAADNAAAEKAAAEK	1×DSSO [K10]	AAAEKAAAEK	1×DSSO [K5]	185.69	23.79	1	TRUE	A0A2K3DLW7	A0A2K3DLW7	chromosome condensation [GO:0030261]	NA	DNA binding [GO:0003677]	chromosome condensation [GO:0030261]	NA	DNA binding [GO:0003677]	20210409_ALS_XL_F53.raw	13330
Intra	Cre12.g498600.t1.2	Cre12.g498600.t1.2	Eukaryotic translation elongation factor 1 alpha	Eukaryotic translation elongation factor 1 alpha	396	387	IVKDFTAQIQTLDIPGEVK	1×DSSO [K3]	TGDVMILKSDQTLK	1×Oxidation [M5]; 1×DSSO [K8]	180.01	146.58	2	FALSE	A0A2K3D3E1	A0A2K3D3E1	translation [GO:0006412]	NA	GTPase activity [GO:0003924]; GTP binding [GO:0005525]	translation [GO:0006412]	NA	GTPase activity [GO:0003924]; GTP binding [GO:0005525]	20210409_ALS_XL_F44.raw	41802
Intra	Cre04.g222700.t1.2	Cre04.g222700.t1.2	Elongation Factor 3 and ABC transporter	Elongation Factor 3 and ABC transporter	19	57	IEEVSSKIAELPESK	1×DSSO [K7]	AGAKGFGATAALK	1×DSSO [K4]	179.23	112.9	1	TRUE	A8ISZ1	A8ISZ1	NA	NA	ATPase activity [GO:0016887]; ATP binding [GO:0005524]; translation elongation factor activity [GO:0003746]	NA	NA	ATPase activity [GO:0016887]; ATP binding [GO:0005524]; translation elongation factor activity [GO:0003746]	20210409_ALS_XL_F49.raw	34272
Intra	Cre12.g498600.t1.2	Cre12.g498600.t1.2	Eukaryotic translation elongation factor 1 alpha	Eukaryotic translation elongation factor 1 alpha	358	293	RVDKAGPGDNVGMNIK	1×Oxidation [M13]; 1×DSSO [K4]	KTDAPLRLPISGAYK	1×DSSO [K1]	179.21	138.86	3	FALSE	A0A2K3D3E1	A0A2K3D3E1	translation [GO:0006412]	NA	GTPase activity [GO:0003924]; GTP binding [GO:0005525]	translation [GO:0006412]	NA	GTPase activity [GO:0003924]; GTP binding [GO:0005525]	20210409_ALS_XL_F60.raw	28649
Intra	Cre06.g275100.t1.2	Cre06.g275100.t1.2	Nucleolin	Nucleolin	223	288	KADDDEEEEAEEEEPVIKK	1×DSSO [K18]	SKGYAHVDFESADQAQK	1×DSSO [K2]	177.36	153.02	1	TRUE	A0A2K3DNK6	A0A2K3DNK6	NA	ribonucleoprotein complex [GO:1990904]	RNA binding [GO:0003723]	NA	ribonucleoprotein complex [GO:1990904]	RNA binding [GO:0003723]	20210409_ALS_XL_F59.raw	25087
Intra	Cre12.g529950.t1.2	Cre12.g529950.t1.2	Eukaryotic translation initiation factor 4, gamma subunit	Eukaryotic translation initiation factor 4, gamma subunit	445	455	TEPAPQVAQQEPVAPSRPAAVAPGKALSEEEVVR	1×DSSO [K25]	KSQSLYQEFTSTLDK	1×DSSO [K1]	176.41	129.95	1	TRUE	A0A2K3D4R1	A0A2K3D4R1	NA	eukaryotic translation initiation factor 4F complex [GO:0016281]	mRNA binding [GO:0003729]; translation initiation factor activity [GO:0003743]	NA	eukaryotic translation initiation factor 4F complex [GO:0016281]	mRNA binding [GO:0003729]; translation initiation factor activity [GO:0003743]	20210409_ALS_XL_F50.raw	40403
Intra	Cre01.g042750.t1.2	Cre01.g042750.t1.2	Aconitate hydratase	Aconitate hydratase	497	503	IGGTVLSNSCGPCIGQWKR	2×Carbamidomethyl [C10; C13]; 1×DSSO [K18]	TDVPKGEANSIITSFNR	1×DSSO [K5]	173.73	137.04	1	TRUE	A0A2K3E7I5	A0A2K3E7I5	tricarboxylic acid cycle [GO:0006099]	cytosol [GO:0005829]; mitochondrion [GO:0005739]	4 iron, 4 sulfur cluster binding [GO:0051539]; aconitate hydratase activity [GO:0003994]; metal ion binding [GO:0046872]	tricarboxylic acid cycle [GO:0006099]	cytosol [GO:0005829]; mitochondrion [GO:0005739]	4 iron, 4 sulfur cluster binding [GO:0051539]; aconitate hydratase activity [GO:0003994]; metal ion binding [GO:0046872]	20210409_ALS_XL_F49.raw	41821
Intra	gi|41179007|ref|NP_958362.1|	gi|41179007|ref|NP_958362.1|	elongation factor Tu (chloroplast)	elongation factor Tu (chloroplast)	791	769	NPSSVAEEHSNKMAMPGDR	2×Oxidation [M13; M15]; 1×DSSO [K12]	TTDVTGKVVGFNHIQMR	1×Oxidation [M16]; 1×DSSO [K7]	167.71	132.49	8	TRUE	P17746	P17746	NA	NA	NA	NA	NA	NA	20210409_ALS_XL_F58.raw	21649
Intra	Cre08.g372100.t1.2	Cre08.g372100.t1.2	Heat shock protein 70A	Heat shock protein 70A	513	518	NKITITNDKGR	1×DSSO [K9]	LSKDEIER	1×DSSO [K3]	92.28	40.01	2	TRUE	A8JEU4	A8JEU4	cellular response to unfolded protein [GO:0034620]; chaperone cofactor-dependent protein refolding [GO:0051085]; protein refolding [GO:0042026]	cytoplasm [GO:0005737]	ATPase activity [GO:0016887]; ATP binding [GO:0005524]; heat shock protein binding [GO:0031072]; misfolded protein binding [GO:0051787]; protein folding chaperone [GO:0044183]; unfolded protein binding [GO:0051082]	cellular response to unfolded protein [GO:0034620]; chaperone cofactor-dependent protein refolding [GO:0051085]; protein refolding [GO:0042026]	cytoplasm [GO:0005737]	ATPase activity [GO:0016887]; ATP binding [GO:0005524]; heat shock protein binding [GO:0031072]; misfolded protein binding [GO:0051787]; protein folding chaperone [GO:0044183]; unfolded protein binding [GO:0051082]	20210409_ALS_XL_F61.raw	19733
Intra	Cre12.g558900.t1.2	Cre12.g558900.t1.2	Regulator of photosynthetic cyclic electron flow	Regulator of photosynthetic cyclic electron flow	98	101	GLAPPALPQSDAPNVAAEKPK	1×DSSO [K19]	KAEVVESTSGGLDPR	1×DSSO [K1]	166.07	105.32	12	TRUE	A8JGW2	A8JGW2	NA	NA	NA	NA	NA	NA	20210409_ALS_XL_F44.raw	29040
Intra	Cre01.g044800.t1.2	Cre01.g044800.t1.2	Pyruvate-formate lyase	Pyruvate-formate lyase	220	239	KTHNSGVFDAYTDEMR	1×Oxidation [M15]; 1×DSSO [K1]	KSGILSGLPDGYGR	1×DSSO [K1]	164.72	124.11	3	TRUE	A0A2K3E7P1	A0A2K3E7P1	carbohydrate metabolic process [GO:0005975]; threonine catabolic process [GO:0006567]	cytosol [GO:0005829]	formate C-acetyltransferase activity [GO:0008861]	carbohydrate metabolic process [GO:0005975]; threonine catabolic process [GO:0006567]	cytosol [GO:0005829]	formate C-acetyltransferase activity [GO:0008861]	20210409_ALS_XL_F58.raw	34099
Intra	Cre06.g273600.t1.2	Cre06.g273600.t1.2	Cytosolic 80S ribosomal protein S27a	Cytosolic 80S ribosomal protein S27a	157	105	KSGGAAAAAAPAPAAEAGGK	1×DSSO [K1]	FYKVDDSGKVQR	1×DSSO [K3]	164.69	164.69	1	TRUE	A8HVK4	A8HVK4	modification-dependent protein catabolic process [GO:0019941]; protein ubiquitination [GO:0016567]; translation [GO:0006412]	cytoplasm [GO:0005737]; nucleus [GO:0005634]; ribosome [GO:0005840]	metal ion binding [GO:0046872]; protein tag [GO:0031386]; structural constituent of ribosome [GO:0003735]; ubiquitin protein ligase binding [GO:0031625]	modification-dependent protein catabolic process [GO:0019941]; protein ubiquitination [GO:0016567]; translation [GO:0006412]	cytoplasm [GO:0005737]; nucleus [GO:0005634]; ribosome [GO:0005840]	metal ion binding [GO:0046872]; protein tag [GO:0031386]; structural constituent of ribosome [GO:0003735]; ubiquitin protein ligase binding [GO:0031625]	20210409_ALS_XL_F57.raw	16851
Intra	Cre13.g586300.t1.2	Cre13.g586300.t1.2	Peptidyl-prolyl cis-trans isomerase, FKBP-type, Flagellar Associated	Peptidyl-prolyl cis-trans isomerase, FKBP-type, Flagellar Associated	58	1	LGMGEVIKGWDEGVAQMSK	2×Oxidation [M3; M17]; 1×DSSO [K8]	GVDVATTRPGDGVSFPK	1×DSSO [G1]	160.74	130.68	13	TRUE	A8HUK0	A8HUK0	chaperone-mediated protein folding [GO:0061077]; protein peptidyl-prolyl isomerization [GO:0000413]	cytoplasm [GO:0005737]	peptidyl-prolyl cis-trans isomerase activity [GO:0003755]	chaperone-mediated protein folding [GO:0061077]; protein peptidyl-prolyl isomerization [GO:0000413]	cytoplasm [GO:0005737]	peptidyl-prolyl cis-trans isomerase activity [GO:0003755]	20210409_ALS_XL_F45.raw	34658
Intra	Cre03.g194850.t1.2	Cre03.g194850.t1.2	NAD-dependent malate dehydrogenase, chloroplastic	NAD-dependent malate dehydrogenase, chloroplastic	117	256	KPGMTRDDLFNTNAGIVK	1×Oxidation [M4]; 1×DSSO [K1]	AGKGSATLSMAYAAAR	1×Oxidation [M10]; 1×DSSO [K3]	160.3	122.74	4	TRUE	P93106	P93106	carbohydrate metabolic process [GO:0005975]; carboxylic acid metabolic process [GO:0019752]; tricarboxylic acid cycle [GO:0006099]	cytoplasm [GO:0005737]; mitochondrion [GO:0005739]	L-malate dehydrogenase activity [GO:0030060]	carbohydrate metabolic process [GO:0005975]; carboxylic acid metabolic process [GO:0019752]; tricarboxylic acid cycle [GO:0006099]	cytoplasm [GO:0005737]; mitochondrion [GO:0005739]	L-malate dehydrogenase activity [GO:0030060]	20210409_ALS_XL_F57.raw	28382
Intra	Cre08.g372000.t1.2	Cre08.g372000.t1.2	conserved protein	conserved protein	304	297	AKSVFQEIAASAPK	1×DSSO [K2]	VQAEYLKEAEAR	1×DSSO [K7]	158.38	97.46	3	TRUE	A0A2K3DH99	A0A2K3DH99	NA	NA	NA	NA	NA	NA	20210409_ALS_XL_F53.raw	38668
Intra	Cre06.g253350.t1.2	Cre06.g253350.t1.2	Glycine cleavage system H protein, mitochondrial	Glycine cleavage system H protein, mitochondrial	140	40	LSNKGELSSLLDSDAYAK	1×DSSO [K4]	GYKYAASHEWAK	1×DSSO [K3]	158.38	125.12	1	TRUE	A8HYD5	A8HYD5	glycine decarboxylation via glycine cleavage system [GO:0019464]; protein lipoylation [GO:0009249]	cytoplasm [GO:0005737]; glycine cleavage complex [GO:0005960]; mitochondrion [GO:0005739]	ATP binding [GO:0005524]	glycine decarboxylation via glycine cleavage system [GO:0019464]; protein lipoylation [GO:0009249]	cytoplasm [GO:0005737]; glycine cleavage complex [GO:0005960]; mitochondrion [GO:0005739]	ATP binding [GO:0005524]	20210409_ALS_XL_F58.raw	36224
Intra	Cre03.g160500.t1.2	Cre03.g160500.t1.2	Lysyl-tRNA synthetase	Lysyl-tRNA synthetase	46	53	LAAEKAEKEAAK	1×DSSO [K8]	AAKAAAAPAKPAK	1×DSSO [K3]	158.12	113.81	3	TRUE	A8J7C8	A8J7C8	lysyl-tRNA aminoacylation [GO:0006430]	cytosol [GO:0005829]; plasmodesma [GO:0009506]	ATP binding [GO:0005524]; lysine-tRNA ligase activity [GO:0004824]; tRNA binding [GO:0000049]	lysyl-tRNA aminoacylation [GO:0006430]	cytosol [GO:0005829]; plasmodesma [GO:0009506]	ATP binding [GO:0005524]; lysine-tRNA ligase activity [GO:0004824]; tRNA binding [GO:0000049]	20210409_ALS_XL_F59.raw	9034
Intra	Cre01.g033550.t1.2	Cre01.g033550.t1.2	Protein disulfide isomerase	Protein disulfide isomerase	187	165	VVEEAEAALAKLEGEAK	1×DSSO [K11]	KFVDAAADAK	1×DSSO [K1]	158.08	105.95	1	TRUE	A8HQT1	A8HQT1	NA	endoplasmic reticulum [GO:0005783]	protein disulfide isomerase activity [GO:0003756]	NA	endoplasmic reticulum [GO:0005783]	protein disulfide isomerase activity [GO:0003756]	20210409_ALS_XL_F51.raw	42124
Inter	Cre06.g259850.t1.2	gi|41179013|ref|NP_958368.1|	Putative chloroplast ribosomal protein L29	ribosomal protein L23 (chloroplast)	54	187	LADFTGLSNEELVNKSNLLKR	1×DSSO [K20]	EGQSINYSLKNDN	1×DSSO [K10]	157.86	157.86	1	TRUE	A8HXM1	Q8HTL3	translation [GO:0006412]	ribosome [GO:0005840]	structural constituent of ribosome [GO:0003735]	NA	NA	NA	20210409_ALS_XL_F52.raw	41511
Intra	Cre01.g038400.t1.2	Cre01.g038400.t1.2	Calreticulin 2, calcium-binding protein	Calreticulin 2, calcium-binding protein	64	50	WYGDAEADKGIQTGPDSK	1×DSSO [K9]	VSDGSAGEFKLTAGK	1×DSSO [K10]	157.82	126.18	3	TRUE	A8HMC0	A8HMC0	endoplasmic reticulum unfolded protein response [GO:0030968]; protein folding [GO:0006457]	endoplasmic reticulum lumen [GO:0005788]; endoplasmic reticulum membrane [GO:0005789]	calcium ion binding [GO:0005509]; unfolded protein binding [GO:0051082]	endoplasmic reticulum unfolded protein response [GO:0030968]; protein folding [GO:0006457]	endoplasmic reticulum lumen [GO:0005788]; endoplasmic reticulum membrane [GO:0005789]	calcium ion binding [GO:0005509]; unfolded protein binding [GO:0051082]	20210409_ALS_XL_F52.raw	31229
Intra	Cre11.g467770.t1.1	Cre11.g467770.t1.1	Phosphoglycerate kinase, chloroplast precursor	Phosphoglycerate kinase, chloroplast precursor	151	71	LSELLGKPVTKVDDCIGPEVEK	1×DSSO [K7]; 1×Carbamidomethyl [C15]	KSVGDLHKADLEGKR	1×DSSO [K8]	157.21	157.21	7	TRUE	A8JC04	A8JC04	gluconeogenesis [GO:0006094]; glycolytic process [GO:0006096]	cytosol [GO:0005829]	ADP binding [GO:0043531]; ATP binding [GO:0005524]; phosphoglycerate kinase activity [GO:0004618]	gluconeogenesis [GO:0006094]; glycolytic process [GO:0006096]	cytosol [GO:0005829]	ADP binding [GO:0043531]; ATP binding [GO:0005524]; phosphoglycerate kinase activity [GO:0004618]	20210409_ALS_XL_F61.raw	33968
Intra	Cre12.g554800.t1.2	Cre12.g554800.t1.2	Phosphoribulokinase, chloroplast precursor	Phosphoribulokinase, chloroplast precursor	210	203	KPDFDAYIDPQKK	1×DSSO [K1]	GHSLESIKSSIAAR	1×DSSO [K8]	157.21	120.44	18	TRUE	A8IYP4	A8IYP4	defense response to bacterium [GO:0042742]; reductive pentose-phosphate cycle [GO:0019253]; response to cold [GO:0009409]	apoplast [GO:0048046]; chloroplast [GO:0009507]; chloroplast envelope [GO:0009941]; chloroplast stroma [GO:0009570]; chloroplast thylakoid membrane [GO:0009535]; stromule [GO:0010319]; supramolecular complex [GO:0099080]	ATP binding [GO:0005524]; disordered domain specific binding [GO:0097718]; kinase activity [GO:0016301]; phosphoribulokinase activity [GO:0008974]; protein homodimerization activity [GO:0042803]	defense response to bacterium [GO:0042742]; reductive pentose-phosphate cycle [GO:0019253]; response to cold [GO:0009409]	apoplast [GO:0048046]; chloroplast [GO:0009507]; chloroplast envelope [GO:0009941]; chloroplast stroma [GO:0009570]; chloroplast thylakoid membrane [GO:0009535]; stromule [GO:0010319]; supramolecular complex [GO:0099080]	ATP binding [GO:0005524]; disordered domain specific binding [GO:0097718]; kinase activity [GO:0016301]; phosphoribulokinase activity [GO:0008974]; protein homodimerization activity [GO:0042803]	20210409_ALS_XL_F62.raw	35985
Intra	Cre02.g080200.t1.2	Cre02.g080200.t1.2	Transketolase	Transketolase	449	289	ISGDFQKGSYAER	1×DSSO [K7]	AVKDKPTLIK	1×DSSO [K3]	155.53	155.53	2	TRUE	A8IAN1	A8IAN1	pentose-phosphate shunt [GO:0006098]	cytosol [GO:0005829]	metal ion binding [GO:0046872]; transketolase activity [GO:0004802]	pentose-phosphate shunt [GO:0006098]	cytosol [GO:0005829]	metal ion binding [GO:0046872]; transketolase activity [GO:0004802]	20210409_ALS_XL_F58.raw	21809
Intra	Cre01.g042750.t1.2	Cre01.g042750.t1.2	Aconitate hydratase	Aconitate hydratase	114	92	VVYGHLDDPENAEMKRGVSYLR	1×Oxidation [M14]; 1×DSSO [K15]	KRLNKPMTLAEK	1×Oxidation [M7]; 1×DSSO [K5]	154.35	154.35	68	TRUE	A0A2K3E7I5	A0A2K3E7I5	tricarboxylic acid cycle [GO:0006099]	cytosol [GO:0005829]; mitochondrion [GO:0005739]	4 iron, 4 sulfur cluster binding [GO:0051539]; aconitate hydratase activity [GO:0003994]; metal ion binding [GO:0046872]	tricarboxylic acid cycle [GO:0006099]	cytosol [GO:0005829]; mitochondrion [GO:0005739]	4 iron, 4 sulfur cluster binding [GO:0051539]; aconitate hydratase activity [GO:0003994]; metal ion binding [GO:0046872]	20210409_ALS_XL_F67.raw	20818
Intra	Cre02.g080700.t1.2	Cre02.g080700.t1.2	Endoplasmic reticulum associated Hsp70 protein	Endoplasmic reticulum associated Hsp70 protein	480	103	DNHKLGQFDLNGIPPAPR	1×DSSO [K4]	KYEDKEVQR	1×DSSO [K1]	154.34	63.4	7	FALSE	A8I7T8	A8I7T8	cellular response to unfolded protein [GO:0034620]; chaperone cofactor-dependent protein refolding [GO:0051085]; endoplasmic reticulum unfolded protein response [GO:0030968]; protein refolding [GO:0042026]; ubiquitin-dependent ERAD pathway [GO:0030433]	cytoplasm [GO:0005737]; endoplasmic reticulum chaperone complex [GO:0034663]; endoplasmic reticulum lumen [GO:0005788]; membrane [GO:0016020]; nucleus [GO:0005634]	ATPase activity [GO:0016887]; ATP binding [GO:0005524]; heat shock protein binding [GO:0031072]; misfolded protein binding [GO:0051787]; protein folding chaperone [GO:0044183]; unfolded protein binding [GO:0051082]	cellular response to unfolded protein [GO:0034620]; chaperone cofactor-dependent protein refolding [GO:0051085]; endoplasmic reticulum unfolded protein response [GO:0030968]; protein refolding [GO:0042026]; ubiquitin-dependent ERAD pathway [GO:0030433]	cytoplasm [GO:0005737]; endoplasmic reticulum chaperone complex [GO:0034663]; endoplasmic reticulum lumen [GO:0005788]; membrane [GO:0016020]; nucleus [GO:0005634]	ATPase activity [GO:0016887]; ATP binding [GO:0005524]; heat shock protein binding [GO:0031072]; misfolded protein binding [GO:0051787]; protein folding chaperone [GO:0044183]; unfolded protein binding [GO:0051082]	20210409_ALS_XL_F61.raw	30399
Intra	Cre04.g222700.t1.2	Cre04.g222700.t1.2	Elongation Factor 3 and ABC transporter	Elongation Factor 3 and ABC transporter	277	320	RKAAVVADNMAK	1×Oxidation [M10]; 1×DSSO [K2]	KVSNSAIK	1×DSSO [K1]	152.83	103.62	5	TRUE	A8ISZ1	A8ISZ1	NA	NA	ATPase activity [GO:0016887]; ATP binding [GO:0005524]; translation elongation factor activity [GO:0003746]	NA	NA	ATPase activity [GO:0016887]; ATP binding [GO:0005524]; translation elongation factor activity [GO:0003746]	20210409_ALS_XL_F55.raw	13283
Intra	Cre01.g042750.t1.2	Cre01.g042750.t1.2	Aconitate hydratase	Aconitate hydratase	189	601	SNKEVYDFLATAGSK	1×DSSO [K3]	GKLSVKVDPASQR	1×DSSO [K6]	152.63	152.63	7	TRUE	A0A2K3E7I5	A0A2K3E7I5	tricarboxylic acid cycle [GO:0006099]	cytosol [GO:0005829]; mitochondrion [GO:0005739]	4 iron, 4 sulfur cluster binding [GO:0051539]; aconitate hydratase activity [GO:0003994]; metal ion binding [GO:0046872]	tricarboxylic acid cycle [GO:0006099]	cytosol [GO:0005829]; mitochondrion [GO:0005739]	4 iron, 4 sulfur cluster binding [GO:0051539]; aconitate hydratase activity [GO:0003994]; metal ion binding [GO:0046872]	20210409_ALS_XL_F58.raw	33796
Intra	Cre01.g032650.t2.1	Cre01.g032650.t2.1	Transaldolase	Transaldolase	262	322	DFASHEDPGVLSVKR	1×DSSO [K14]	KLTPEKAQTDALK	1×DSSO [K6]	152.63	152.63	1	FALSE	A8HQP0	A8HQP0	carbohydrate metabolic process [GO:0005975]; pentose-phosphate shunt [GO:0006098]	cytoplasm [GO:0005737]	sedoheptulose-7-phosphate:D-glyceraldehyde-3-phosphate glyceronetransferase activity [GO:0004801]	carbohydrate metabolic process [GO:0005975]; pentose-phosphate shunt [GO:0006098]	cytoplasm [GO:0005737]	sedoheptulose-7-phosphate:D-glyceraldehyde-3-phosphate glyceronetransferase activity [GO:0004801]	20210409_ALS_XL_F60.raw	26844
Intra	Cre12.g498600.t1.2	Cre12.g498600.t1.2	Eukaryotic translation elongation factor 1 alpha	Eukaryotic translation elongation factor 1 alpha	293	230	KTDAPLRLPISGAYK	1×DSSO [K1]	VGWKDDFVNK	1×DSSO [K4]	152.41	122.43	8	FALSE	A0A2K3D3E1	A0A2K3D3E1	translation [GO:0006412]	NA	GTPase activity [GO:0003924]; GTP binding [GO:0005525]	translation [GO:0006412]	NA	GTPase activity [GO:0003924]; GTP binding [GO:0005525]	20210409_ALS_XL_F58.raw	38455
Intra	Cre03.g144767.t1.1	Cre03.g144767.t1.1	(1 of 2) PF01902 - Diphthamide synthase (Diphthami_syn_2)	(1 of 2) PF01902 - Diphthamide synthase (Diphthami_syn_2)	13	10	KTAVSFTGGKDSMTVVNLLK	1×DSSO [K1]; 1×Oxidation [M13]	AEDVAATAKPR	1×Acetyl [A1]; 1×DSSO [K9]	151.14	151.14	3	TRUE	A8J349	A8J349	NA	NA	NA	NA	NA	NA	20210409_ALS_XL_F45.raw	34176
Intra	Cre06.g249750.t1.1	Cre06.g249750.t1.1	(1 of 1) PF07382//PF13374 - Histone H1-like nucleoprotein HC2 (HC2) // Tetratricopeptide repeat (TPR_10)	(1 of 1) PF07382//PF13374 - Histone H1-like nucleoprotein HC2 (HC2) // Tetratricopeptide repeat (TPR_10)	321	316	AAAEKATAEK	1×DSSO [K5]	AAAEKAAAEK	1×DSSO [K5]	150.82	44.06	2	TRUE	A0A2K3DLW7	A0A2K3DLW7	chromosome condensation [GO:0030261]	NA	DNA binding [GO:0003677]	chromosome condensation [GO:0030261]	NA	DNA binding [GO:0003677]	20210409_ALS_XL_F54.raw	7147
Intra	Cre06.g275100.t1.2	Cre06.g275100.t1.2	Nucleolin	Nucleolin	95	90	KAADSDDDDDSDDDDDSDDEPPAKK	1×DSSO [K1]	AAPAAKAAAK	1×DSSO [K6]	150.72	115.91	2	TRUE	A0A2K3DNK6	A0A2K3DNK6	NA	ribonucleoprotein complex [GO:1990904]	RNA binding [GO:0003723]	NA	ribonucleoprotein complex [GO:1990904]	RNA binding [GO:0003723]	20210409_ALS_XL_F56.raw	8179
Intra	Cre01.g033550.t1.2	Cre01.g033550.t1.2	Protein disulfide isomerase	Protein disulfide isomerase	234	241	LLAGGSVNAAKVDEMSR	1×Oxidation [M15]; 1×DSSO [K11]	KTSVLGAFAAEDEE	1×DSSO [K1]	149.59	111.87	4	TRUE	A8HQT1	A8HQT1	NA	endoplasmic reticulum [GO:0005783]	protein disulfide isomerase activity [GO:0003756]	NA	endoplasmic reticulum [GO:0005783]	protein disulfide isomerase activity [GO:0003756]	20210409_ALS_XL_F37.raw	35699
Intra	Cre12.g498600.t1.2	Cre12.g498600.t1.2	Eukaryotic translation elongation factor 1 alpha	Eukaryotic translation elongation factor 1 alpha	370	307	AGPGDNVGMNIKGLDKGNMPR	1×Oxidation [M9; M19]; 1×DSSO [K12]	TDAPLRLPISGAYKIK	1×DSSO [K14]	149.01	149.01	5	FALSE	A0A2K3D3E1	A0A2K3D3E1	translation [GO:0006412]	NA	GTPase activity [GO:0003924]; GTP binding [GO:0005525]	translation [GO:0006412]	NA	GTPase activity [GO:0003924]; GTP binding [GO:0005525]	20210409_ALS_XL_F58.raw	36442
Intra	Cre05.g248450.t1.2	Cre05.g248450.t1.2	Mitochondrial carbonic anhydrase	Mitochondrial carbonic anhydrase	213	245	KAQAGDVDGAIAENVK	1×DSSO [K1]	VSPVLQGLVKEGK	1×DSSO [K10]	148.98	109.48	1	FALSE	P93109	P93109	NA	NA	carbonate dehydratase activity [GO:0004089]; zinc ion binding [GO:0008270]	NA	NA	carbonate dehydratase activity [GO:0004089]; zinc ion binding [GO:0008270]	20210409_ALS_XL_F49.raw	33833
Intra	Cre09.g415800.t1.2	Cre09.g415800.t1.2	MA3 domain-containing protein	MA3 domain-containing protein	47	39	AAANHKAAAASGER	1×DSSO [K6]	DKAQEQAKAR	1×DSSO [K8]	148.37	86.45	5	TRUE	A0A2K3DG12	A0A2K3DG12	negative regulation of transcription, DNA-templated [GO:0045892]	cytoplasm [GO:0005737]	NA	negative regulation of transcription, DNA-templated [GO:0045892]	cytoplasm [GO:0005737]	NA	20210409_ALS_XL_F63.raw	5572
Intra	Cre06.g306300.t1.2	Cre06.g306300.t1.2	Magnesium chelatase subunit I, isoform 1	Magnesium chelatase subunit I, isoform 1	198	157	ALTEGVKAFEPGLLAK	1×DSSO [K7]	VKAGEQLPVSSK	1×DSSO [K2]	148.21	113.38	1	TRUE	A8IMZ5	A8IMZ5	chlorophyll biosynthetic process [GO:0015995]; photosynthesis [GO:0015979]	chloroplast stroma [GO:0009570]	ATP binding [GO:0005524]; magnesium chelatase activity [GO:0016851]	chlorophyll biosynthetic process [GO:0015995]; photosynthesis [GO:0015979]	chloroplast stroma [GO:0009570]	ATP binding [GO:0005524]; magnesium chelatase activity [GO:0016851]	20210409_ALS_XL_F47.raw	36709
Intra	Cre12.g513200.t1.2	Cre12.g513200.t1.2	Enolase	Enolase	128	168	GMDPVKQAEIDQK	1×Oxidation [M2]; 1×DSSO [K6]	AGAAEKGVPLYK	1×DSSO [K6]	148.21	103.98	1	TRUE	A8JH98	A8JH98	glycolytic process [GO:0006096]; regulation of vacuole fusion, non-autophagic [GO:0032889]	axonemal central pair projection [GO:1990718]; phosphopyruvate hydratase complex [GO:0000015]	magnesium ion binding [GO:0000287]; phosphopyruvate hydratase activity [GO:0004634]	glycolytic process [GO:0006096]; regulation of vacuole fusion, non-autophagic [GO:0032889]	axonemal central pair projection [GO:1990718]; phosphopyruvate hydratase complex [GO:0000015]	magnesium ion binding [GO:0000287]; phosphopyruvate hydratase activity [GO:0004634]	20210409_ALS_XL_F52.raw	24678
Intra	Cre09.g386400.t1.2	Cre09.g386400.t1.2	Flagellar Associated Protein 124	Flagellar Associated Protein 124	816	658	AGVQIETDPKADR	1×DSSO [K10]	SEFEGLLEKAPR	1×DSSO [K9]	147.83	100.39	2	TRUE	A8J1C1	A8J1C1	cellular response to DNA damage stimulus [GO:0006974]; protein modification by small protein conjugation [GO:0032446]; protein ubiquitination [GO:0016567]; ubiquitin-dependent protein catabolic process [GO:0006511]	cytoplasm [GO:0005737]; nucleus [GO:0005634]	ATP binding [GO:0005524]; ubiquitin activating enzyme activity [GO:0004839]	cellular response to DNA damage stimulus [GO:0006974]; protein modification by small protein conjugation [GO:0032446]; protein ubiquitination [GO:0016567]; ubiquitin-dependent protein catabolic process [GO:0006511]	cytoplasm [GO:0005737]; nucleus [GO:0005634]	ATP binding [GO:0005524]; ubiquitin activating enzyme activity [GO:0004839]	20210409_ALS_XL_F53.raw	35903
Intra	Cre11.g467770.t1.1	Cre11.g467770.t1.1	Phosphoglycerate kinase, chloroplast precursor	Phosphoglycerate kinase, chloroplast precursor	308	314	GLKVGSSLVEDDKIELAK	1×DSSO [K13]	KLEEMAK	1×Oxidation [M5]; 1×DSSO [K1]	147.63	99.69	16	TRUE	A8JC04	A8JC04	gluconeogenesis [GO:0006094]; glycolytic process [GO:0006096]	cytosol [GO:0005829]	ADP binding [GO:0043531]; ATP binding [GO:0005524]; phosphoglycerate kinase activity [GO:0004618]	gluconeogenesis [GO:0006094]; glycolytic process [GO:0006096]	cytosol [GO:0005829]	ADP binding [GO:0043531]; ATP binding [GO:0005524]; phosphoglycerate kinase activity [GO:0004618]	20210409_ALS_XL_F52.raw	27516
Intra	gi|41179007|ref|NP_958362.1|	gi|41179007|ref|NP_958362.1|	elongation factor Tu (chloroplast)	elongation factor Tu (chloroplast)	769	475	TTDVTGKVVGFNHIQMR	1×Oxidation [M16]; 1×DSSO [K7]	KYDEIDSAPEEKAR	1×DSSO [K12]	147.36	106.25	2	TRUE	P17746	P17746	NA	NA	NA	NA	NA	NA	20210409_ALS_XL_F60.raw	27355
Intra	Cre12.g498600.t1.2	Cre12.g498600.t1.2	Eukaryotic translation elongation factor 1 alpha	Eukaryotic translation elongation factor 1 alpha	345	370	VEQGVVKPGDEVIFLPTHTTANPCTGKVFTVEMHHK	1×Carbamidomethyl [C24]; 1×Oxidation [M33]; 1×DSSO [K27]	AGPGDNVGMNIKGLDK	1×Oxidation [M9]; 1×DSSO [K12]	145.44	145.44	1	FALSE	A0A2K3D3E1	A0A2K3D3E1	translation [GO:0006412]	NA	GTPase activity [GO:0003924]; GTP binding [GO:0005525]	translation [GO:0006412]	NA	GTPase activity [GO:0003924]; GTP binding [GO:0005525]	20210409_ALS_XL_F60.raw	35793
Intra	Cre02.g080700.t1.2	Cre02.g080700.t1.2	Endoplasmic reticulum associated Hsp70 protein	Endoplasmic reticulum associated Hsp70 protein	114	107	DKKLVSYDIVDR	1×DSSO [K3]	KYEDKEVQRDK	1×DSSO [K5]	145	102.4	47	FALSE	A8I7T8	A8I7T8	cellular response to unfolded protein [GO:0034620]; chaperone cofactor-dependent protein refolding [GO:0051085]; endoplasmic reticulum unfolded protein response [GO:0030968]; protein refolding [GO:0042026]; ubiquitin-dependent ERAD pathway [GO:0030433]	cytoplasm [GO:0005737]; endoplasmic reticulum chaperone complex [GO:0034663]; endoplasmic reticulum lumen [GO:0005788]; membrane [GO:0016020]; nucleus [GO:0005634]	ATPase activity [GO:0016887]; ATP binding [GO:0005524]; heat shock protein binding [GO:0031072]; misfolded protein binding [GO:0051787]; protein folding chaperone [GO:0044183]; unfolded protein binding [GO:0051082]	cellular response to unfolded protein [GO:0034620]; chaperone cofactor-dependent protein refolding [GO:0051085]; endoplasmic reticulum unfolded protein response [GO:0030968]; protein refolding [GO:0042026]; ubiquitin-dependent ERAD pathway [GO:0030433]	cytoplasm [GO:0005737]; endoplasmic reticulum chaperone complex [GO:0034663]; endoplasmic reticulum lumen [GO:0005788]; membrane [GO:0016020]; nucleus [GO:0005634]	ATPase activity [GO:0016887]; ATP binding [GO:0005524]; heat shock protein binding [GO:0031072]; misfolded protein binding [GO:0051787]; protein folding chaperone [GO:0044183]; unfolded protein binding [GO:0051082]	20210409_ALS_XL_F65.raw	24764
Intra	Cre10.g438600.t1.2	Cre10.g438600.t1.2	(1 of 1) KOG4766 - Uncharacterized conserved protein	(1 of 1) KOG4766 - Uncharacterized conserved protein	17	34	KADKDYDDSDLEFLAK	1×DSSO [K1]	KKAEEAALK	1×DSSO [K2]	145	145	1	TRUE	A0A2K3DAC3	A0A2K3DAC3	cytoplasmic translation [GO:0002181]	NA	NA	cytoplasmic translation [GO:0002181]	NA	NA	20210409_ALS_XL_F62.raw	29034
Intra	Cre03.g189400.t1.2	Cre03.g189400.t1.2	Seryl-tRNA(Sec) synthetase	Seryl-tRNA(Sec) synthetase	61	68	EFNALNKEIATVR	1×DSSO [K7]	KAGGNSDELQEK	1×DSSO [K1]	144.83	112.53	1	TRUE	A8IRT6	A8IRT6	response to cadmium ion [GO:0046686]; seryl-tRNA aminoacylation [GO:0006434]	cytosol [GO:0005829]	ATP binding [GO:0005524]; serine-tRNA ligase activity [GO:0004828]; tRNA binding [GO:0000049]	response to cadmium ion [GO:0046686]; seryl-tRNA aminoacylation [GO:0006434]	cytosol [GO:0005829]	ATP binding [GO:0005524]; serine-tRNA ligase activity [GO:0004828]; tRNA binding [GO:0000049]	20210409_ALS_XL_F55.raw	27818
Intra	Cre06.g306300.t1.2	Cre06.g306300.t1.2	Magnesium chelatase subunit I, isoform 1	Magnesium chelatase subunit I, isoform 1	168	157	KIPMVDLPLGATEDR	1×Oxidation [M4]; 1×DSSO [K1]	VKAGEQLPVSSK	1×DSSO [K2]	144.75	97.16	1	TRUE	A8IMZ5	A8IMZ5	chlorophyll biosynthetic process [GO:0015995]; photosynthesis [GO:0015979]	chloroplast stroma [GO:0009570]	ATP binding [GO:0005524]; magnesium chelatase activity [GO:0016851]	chlorophyll biosynthetic process [GO:0015995]; photosynthesis [GO:0015979]	chloroplast stroma [GO:0009570]	ATP binding [GO:0005524]; magnesium chelatase activity [GO:0016851]	20210409_ALS_XL_F49.raw	35410
Intra	Cre05.g233050.t1.2	Cre05.g233050.t1.2	Flagellar Associated Protein 162	Flagellar Associated Protein 162	135	114	VLIEGDSEKGLFPLK	1×DSSO [K9]	LVAAAGGKVAK	1×DSSO [K8]	144.29	100.16	3	TRUE	A8JG73	A8JG73	NA	motile cilium [GO:0031514]	NA	NA	motile cilium [GO:0031514]	NA	20210409_ALS_XL_F49.raw	36875
Inter	Cre09.g405400.t1.2	Cre12.g523150.t1.2	Prefoldin molecular chaperone, subunit 1-related protein	Prefoldin alpha subunit	62	51	TELSGMPDSATMYKSIGK	2×Oxidation [M6; M12]; 1×DSSO [K14]	KSVEQLGASK	1×DSSO [K1]	144.2	99.48	1	TRUE	A8J814	A0A2K3D482	protein folding [GO:0006457]	cytoplasm [GO:0005737]; prefoldin complex [GO:0016272]	protein folding chaperone [GO:0044183]; unfolded protein binding [GO:0051082]	protein folding [GO:0006457]; regulation of transcription, DNA-templated [GO:0006355]	cytoplasm [GO:0005737]; prefoldin complex [GO:0016272]	unfolded protein binding [GO:0051082]	20210409_ALS_XL_F49.raw	24107
Intra	Cre11.g478800.t1.2	Cre11.g478800.t1.2	None	None	582	528	AAPAPAKEEEK	1×DSSO [K7]	AAPAPAKEEK	1×DSSO [K7]	144.2	32.72	1	TRUE	A0A2K3D8I4	A0A2K3D8I4	intracellular mRNA localization [GO:0008298]	endoplasmic reticulum [GO:0005783]; nuclear outer membrane-endoplasmic reticulum membrane network [GO:0042175]; ribonucleoprotein complex [GO:1990904]	NA	intracellular mRNA localization [GO:0008298]	endoplasmic reticulum [GO:0005783]; nuclear outer membrane-endoplasmic reticulum membrane network [GO:0042175]; ribonucleoprotein complex [GO:1990904]	NA	20210409_ALS_XL_F53.raw	9643
Intra	Cre06.g249750.t1.1	Cre06.g249750.t1.1	(1 of 1) PF07382//PF13374 - Histone H1-like nucleoprotein HC2 (HC2) // Tetratricopeptide repeat (TPR_10)	(1 of 1) PF07382//PF13374 - Histone H1-like nucleoprotein HC2 (HC2) // Tetratricopeptide repeat (TPR_10)	311	316	AAAEKAAAEKAAAEK	1×DSSO [K5]	AAAEKAAAEK	1×DSSO [K5]	144.01	144.01	1	TRUE	A0A2K3DLW7	A0A2K3DLW7	chromosome condensation [GO:0030261]	NA	DNA binding [GO:0003677]	chromosome condensation [GO:0030261]	NA	DNA binding [GO:0003677]	20210409_ALS_XL_F57.raw	11978
Intra	Cre02.g088200.t1.2	Cre02.g088200.t1.2	Protein disulfide isomerase 1	Protein disulfide isomerase 1	168	153	KTGPPAVTVEDADKLK	1×DSSO [K14]	DADGIVGWVKK	1×DSSO [K10]	143.97	77.64	2	TRUE	O48949	O48949	protein folding [GO:0006457]; response to endoplasmic reticulum stress [GO:0034976]	endoplasmic reticulum [GO:0005783]; endoplasmic reticulum lumen [GO:0005788]	protein disulfide isomerase activity [GO:0003756]	protein folding [GO:0006457]; response to endoplasmic reticulum stress [GO:0034976]	endoplasmic reticulum [GO:0005783]; endoplasmic reticulum lumen [GO:0005788]	protein disulfide isomerase activity [GO:0003756]	20210409_ALS_XL_F57.raw	34332
Intra	Cre17.g732300.t1.2	Cre17.g732300.t1.2	Galactose kinase	Galactose kinase	11	27	ADLEGALSFKPSPSVPLYK	1×Acetyl [A1]; 1×DSSO [K10]	DLGAVYKGVPGVEER	1×DSSO [K7]	143.37	102.65	1	TRUE	A0A2K3CR25	A0A2K3CR25	galactose metabolic process [GO:0006012]	cytosol [GO:0005829]	ATP binding [GO:0005524]; galactokinase activity [GO:0004335]	galactose metabolic process [GO:0006012]	cytosol [GO:0005829]	ATP binding [GO:0005524]; galactokinase activity [GO:0004335]	20210409_ALS_XL_F30.raw	48251
Intra	Cre09.g393358.t1.1	Cre09.g393358.t1.1	Hyaluronan / mRNA binding family	Hyaluronan / mRNA binding family	236	220	VFTKQSTEEQGLDLAAVEK	1×DSSO [K4]	SAEAKNVDPNAELK	1×DSSO [K5]	143.04	106.35	1	TRUE	A8J087	A8J087	NA	cytoplasm [GO:0005737]; nucleus [GO:0005634]	RNA binding [GO:0003723]	NA	cytoplasm [GO:0005737]; nucleus [GO:0005634]	RNA binding [GO:0003723]	20210409_ALS_XL_F46.raw	31804
Intra	Cre09.g386400.t1.2	Cre09.g386400.t1.2	Flagellar Associated Protein 124	Flagellar Associated Protein 124	510	658	LTVTDDDVIEKSNLSR	1×DSSO [K11]	SEFEGLLEKAPR	1×DSSO [K9]	143.02	87.34	1	TRUE	A8J1C1	A8J1C1	cellular response to DNA damage stimulus [GO:0006974]; protein modification by small protein conjugation [GO:0032446]; protein ubiquitination [GO:0016567]; ubiquitin-dependent protein catabolic process [GO:0006511]	cytoplasm [GO:0005737]; nucleus [GO:0005634]	ATP binding [GO:0005524]; ubiquitin activating enzyme activity [GO:0004839]	cellular response to DNA damage stimulus [GO:0006974]; protein modification by small protein conjugation [GO:0032446]; protein ubiquitination [GO:0016567]; ubiquitin-dependent protein catabolic process [GO:0006511]	cytoplasm [GO:0005737]; nucleus [GO:0005634]	ATP binding [GO:0005524]; ubiquitin activating enzyme activity [GO:0004839]	20210409_ALS_XL_F51.raw	40428
Intra	Cre06.g249750.t1.1	Cre06.g249750.t1.1	(1 of 1) PF07382//PF13374 - Histone H1-like nucleoprotein HC2 (HC2) // Tetratricopeptide repeat (TPR_10)	(1 of 1) PF07382//PF13374 - Histone H1-like nucleoprotein HC2 (HC2) // Tetratricopeptide repeat (TPR_10)	331	321	AAAEKAAADKVAAEK	1×DSSO [K5]	AAAEKATAEK	1×DSSO [K5]	142.63	142.63	1	TRUE	A0A2K3DLW7	A0A2K3DLW7	chromosome condensation [GO:0030261]	NA	DNA binding [GO:0003677]	chromosome condensation [GO:0030261]	NA	DNA binding [GO:0003677]	20210409_ALS_XL_F57.raw	11497
Intra	Cre02.g115200.t1.2	Cre02.g115200.t1.2	Cytosolic 80S ribosomal protein L27a	Cytosolic 80S ribosomal protein L27a	104	124	SSAAVIDVTKYGISK	1×DSSO [K10]	GQLPEQPVVVKAK	1×DSSO [K11]	140.98	110.25	2	TRUE	A8I2T0	A8I2T0	translation [GO:0006412]	cytosolic large ribosomal subunit [GO:0022625]	structural constituent of ribosome [GO:0003735]	translation [GO:0006412]	cytosolic large ribosomal subunit [GO:0022625]	structural constituent of ribosome [GO:0003735]	20210409_ALS_XL_F47.raw	34463
Intra	Cre02.g093450.t1.2	Cre02.g093450.t1.2	Fructose-1,6-bisphosphate aldolase	Fructose-1,6-bisphosphate aldolase	35	31	LEKAGLPNTEDIRR	1×DSSO [K3]	GLLASDESTGTIGKR	1×DSSO [K14]	140.77	104.86	3	TRUE	A8I9H5	A8I9H5	fructose 1,6-bisphosphate metabolic process [GO:0030388]; glycolytic process [GO:0006096]	cytosol [GO:0005829]	fructose-bisphosphate aldolase activity [GO:0004332]	fructose 1,6-bisphosphate metabolic process [GO:0030388]; glycolytic process [GO:0006096]	cytosol [GO:0005829]	fructose-bisphosphate aldolase activity [GO:0004332]	20210409_ALS_XL_F52.raw	31648
Intra	Cre06.g275100.t1.2	Cre06.g275100.t1.2	Nucleolin	Nucleolin	176	163	KAAAKDDSDDDEEDSDDDDDDEDMEEAKPAAAK	1×Oxidation [M24]; 1×DSSO [K5]	KKAAAPAAAK	1×DSSO [K2]	140.72	140.72	1	TRUE	A0A2K3DNK6	A0A2K3DNK6	NA	ribonucleoprotein complex [GO:1990904]	RNA binding [GO:0003723]	NA	ribonucleoprotein complex [GO:1990904]	RNA binding [GO:0003723]	20210409_ALS_XL_F60.raw	8388
Intra	Cre01.g033550.t1.2	Cre01.g033550.t1.2	Protein disulfide isomerase	Protein disulfide isomerase	176	165	AKVVEEAEAALAK	1×DSSO [K2]	KFVDAAADAK	1×DSSO [K1]	140.01	90.59	2	TRUE	A8HQT1	A8HQT1	NA	endoplasmic reticulum [GO:0005783]	protein disulfide isomerase activity [GO:0003756]	NA	endoplasmic reticulum [GO:0005783]	protein disulfide isomerase activity [GO:0003756]	20210409_ALS_XL_F53.raw	32482
Intra	Cre08.g372100.t1.2	Cre08.g372100.t1.2	Heat shock protein 70A	Heat shock protein 70A	532	540	MVQEAEKYKADDEQLK	1×Oxidation [M1]; 1×DSSO [K9]	KKVEAK	1×DSSO [K1]	62.09	62.09	1	TRUE	A8JEU4	A8JEU4	cellular response to unfolded protein [GO:0034620]; chaperone cofactor-dependent protein refolding [GO:0051085]; protein refolding [GO:0042026]	cytoplasm [GO:0005737]	ATPase activity [GO:0016887]; ATP binding [GO:0005524]; heat shock protein binding [GO:0031072]; misfolded protein binding [GO:0051787]; protein folding chaperone [GO:0044183]; unfolded protein binding [GO:0051082]	cellular response to unfolded protein [GO:0034620]; chaperone cofactor-dependent protein refolding [GO:0051085]; protein refolding [GO:0042026]	cytoplasm [GO:0005737]	ATPase activity [GO:0016887]; ATP binding [GO:0005524]; heat shock protein binding [GO:0031072]; misfolded protein binding [GO:0051787]; protein folding chaperone [GO:0044183]; unfolded protein binding [GO:0051082]	20210409_ALS_XL_F62.raw	13913
Intra	Cre02.g080700.t1.2	Cre02.g080700.t1.2	Endoplasmic reticulum associated Hsp70 protein	Endoplasmic reticulum associated Hsp70 protein	113	107	DKKLVSYDIVDR	1×DSSO [K2]	KYEDKEVQR	1×DSSO [K5]	139.01	139.01	19	TRUE	A8I7T8	A8I7T8	cellular response to unfolded protein [GO:0034620]; chaperone cofactor-dependent protein refolding [GO:0051085]; endoplasmic reticulum unfolded protein response [GO:0030968]; protein refolding [GO:0042026]; ubiquitin-dependent ERAD pathway [GO:0030433]	cytoplasm [GO:0005737]; endoplasmic reticulum chaperone complex [GO:0034663]; endoplasmic reticulum lumen [GO:0005788]; membrane [GO:0016020]; nucleus [GO:0005634]	ATPase activity [GO:0016887]; ATP binding [GO:0005524]; heat shock protein binding [GO:0031072]; misfolded protein binding [GO:0051787]; protein folding chaperone [GO:0044183]; unfolded protein binding [GO:0051082]	cellular response to unfolded protein [GO:0034620]; chaperone cofactor-dependent protein refolding [GO:0051085]; endoplasmic reticulum unfolded protein response [GO:0030968]; protein refolding [GO:0042026]; ubiquitin-dependent ERAD pathway [GO:0030433]	cytoplasm [GO:0005737]; endoplasmic reticulum chaperone complex [GO:0034663]; endoplasmic reticulum lumen [GO:0005788]; membrane [GO:0016020]; nucleus [GO:0005634]	ATPase activity [GO:0016887]; ATP binding [GO:0005524]; heat shock protein binding [GO:0031072]; misfolded protein binding [GO:0051787]; protein folding chaperone [GO:0044183]; unfolded protein binding [GO:0051082]	20210409_ALS_XL_F65.raw	25583
Intra	Cre17.g734500.t1.2	Cre17.g734500.t1.2	Vacuolar ATP synthase subunit E	Vacuolar ATP synthase subunit E	85	18	VLAAKEAAVQDIITDAK	1×DSSO [K5]	FIKQEAEEK	1×DSSO [K3]	138.65	88.62	1	TRUE	A8IW47	A8IW47	NA	proton-transporting two-sector ATPase complex, catalytic domain [GO:0033178]	proton-exporting ATPase activity, phosphorylative mechanism [GO:0008553]; proton-transporting ATPase activity, rotational mechanism [GO:0046961]	NA	proton-transporting two-sector ATPase complex, catalytic domain [GO:0033178]	proton-exporting ATPase activity, phosphorylative mechanism [GO:0008553]; proton-transporting ATPase activity, rotational mechanism [GO:0046961]	20210409_ALS_XL_F51.raw	38348
Intra	Cre12.g497300.t2.1	Cre12.g497300.t2.1	Rhodanese-like Ca-sensing receptor	Rhodanese-like Ca-sensing receptor	76	90	ATGEVVKAGITTLQSGVK	1×DSSO [K7]	ILKDGYDVAAPYAR	1×DSSO [K3]	138.4	106.72	1	TRUE	A8JGM1	A8JGM1	NA	NA	NA	NA	NA	NA	20210409_ALS_XL_F47.raw	37374
Intra	Cre04.g222700.t1.2	Cre04.g222700.t1.2	Elongation Factor 3 and ABC transporter	Elongation Factor 3 and ABC transporter	337	342	TLQHIETEGKAK	1×DSSO [K10]	LAKTLDKGAALK	1×DSSO [K3]	138.25	138.25	1	TRUE	A8ISZ1	A8ISZ1	NA	NA	ATPase activity [GO:0016887]; ATP binding [GO:0005524]; translation elongation factor activity [GO:0003746]	NA	NA	ATPase activity [GO:0016887]; ATP binding [GO:0005524]; translation elongation factor activity [GO:0003746]	20210409_ALS_XL_F60.raw	19100
Inter	Cre06.g273600.t1.2	Cre08.g360900.t1.2	Cytosolic 80S ribosomal protein S27a	Cytosolic 80S ribosomal protein S15	157	65	KSGGAAAAAAPAPAAEAGGK	1×DSSO [K1]	KLAASGEKPEPVR	1×DSSO [K1]	138.24	96.13	1	TRUE	A8HVK4	A8J493	modification-dependent protein catabolic process [GO:0019941]; protein ubiquitination [GO:0016567]; translation [GO:0006412]	cytoplasm [GO:0005737]; nucleus [GO:0005634]; ribosome [GO:0005840]	metal ion binding [GO:0046872]; protein tag [GO:0031386]; structural constituent of ribosome [GO:0003735]; ubiquitin protein ligase binding [GO:0031625]	ribosomal small subunit assembly [GO:0000028]; translation [GO:0006412]	cytosolic small ribosomal subunit [GO:0022627]	RNA binding [GO:0003723]; structural constituent of ribosome [GO:0003735]	20210409_ALS_XL_F56.raw	13547
Intra	Cre12.g557600.t1.1	Cre12.g557600.t1.1	Adenylate kinase	Adenylate kinase	122	197	TVVQAKKLDEMLAK	1×Oxidation [M11]; 1×DSSO [K6]	KDDNAETLKAR	1×DSSO [K9]	137.83	137.83	2	TRUE	A0A2K3D5Q3	A0A2K3D5Q3	NA	cytoplasm [GO:0005737]; mitochondrion [GO:0005739]	adenylate kinase activity [GO:0004017]; ATP binding [GO:0005524]	NA	cytoplasm [GO:0005737]; mitochondrion [GO:0005739]	adenylate kinase activity [GO:0004017]; ATP binding [GO:0005524]	20210409_ALS_XL_F61.raw	22277
Intra	Cre02.g097550.t1.2	Cre02.g097550.t1.2	YebC-related	YebC-related	169	160	AGAKVAEPGSVLFNFQR	1×DSSO [K4]	TASEVKPTVTK	1×DSSO [K6]	137.26	95.86	3	TRUE	A0A2K3E242	A0A2K3E242	NA	chloroplast [GO:0009507]	NA	NA	chloroplast [GO:0009507]	NA	20210409_ALS_XL_F49.raw	36216
Intra	Cre06.g306300.t1.2	Cre06.g306300.t1.2	Magnesium chelatase subunit I, isoform 1	Magnesium chelatase subunit I, isoform 1	70	167	TEKELGQARPIFPFTAIVGQDEMK	1×Oxidation [M23]; 1×DSSO [K3]	AGEQLPVSSKK	1×DSSO [K10]	136.98	100.28	4	TRUE	A8IMZ5	A8IMZ5	chlorophyll biosynthetic process [GO:0015995]; photosynthesis [GO:0015979]	chloroplast stroma [GO:0009570]	ATP binding [GO:0005524]; magnesium chelatase activity [GO:0016851]	chlorophyll biosynthetic process [GO:0015995]; photosynthesis [GO:0015979]	chloroplast stroma [GO:0009570]	ATP binding [GO:0005524]; magnesium chelatase activity [GO:0016851]	20210409_ALS_XL_F55.raw	40303
Intra	Cre02.g088900.t1.2	Cre02.g088900.t1.2	Chloroplast ribosomal protein L1	Chloroplast ribosomal protein L1	293	84	IGVSALQNTKGKAE	1×DSSO [K10]	TSELDPKEAIR	1×DSSO [K7]	136.33	136.33	9	TRUE	A8I8Z4	A8I8Z4	maturation of LSU-rRNA [GO:0000470]; translation [GO:0006412]	cytosolic large ribosomal subunit [GO:0022625]	RNA binding [GO:0003723]; rRNA binding [GO:0019843]; structural constituent of ribosome [GO:0003735]	maturation of LSU-rRNA [GO:0000470]; translation [GO:0006412]	cytosolic large ribosomal subunit [GO:0022625]	RNA binding [GO:0003723]; rRNA binding [GO:0019843]; structural constituent of ribosome [GO:0003735]	20210409_ALS_XL_F53.raw	29610
Inter	Cre06.g259850.t1.2	gi|41179013|ref|NP_958368.1|	Putative chloroplast ribosomal protein L29	ribosomal protein L23 (chloroplast)	49	187	LADFTGLSNEELVNKSNLLKR	1×DSSO [K15]	EGQSINYSLKNDN	1×DSSO [K10]	136.23	111.54	5	TRUE	A8HXM1	Q8HTL3	translation [GO:0006412]	ribosome [GO:0005840]	structural constituent of ribosome [GO:0003735]	NA	NA	NA	20210409_ALS_XL_F36.raw	41114
Inter	Cre12.g528000.t1.2	Cre04.g222700.t1.2	Flagellar Associated Protein 303	Elongation Factor 3 and ABC transporter	379	995	EIIKPEAPQHNFKR	1×DSSO [K13]	EGDNLIAIKEK	1×DSSO [K9]	135.5	118.92	3	TRUE	A8J5B8	A8ISZ1	NA	NA	NA	NA	NA	ATPase activity [GO:0016887]; ATP binding [GO:0005524]; translation elongation factor activity [GO:0003746]	20210409_ALS_XL_F61.raw	27314
Intra	Cre07.g331900.t1.2	Cre07.g331900.t1.2	Cytosolic 80S ribosomal protein S13	Cytosolic 80S ribosomal protein S13	39	43	TTGAEVQEMICKFAR	1×Carbamidomethyl [C11]; 1×Oxidation [M9]; 1×DSSO [K12]	KGMTPSQIGIVLR	1×Oxidation [M3]; 1×DSSO [K1]	134.81	104.66	8	TRUE	A8IGY1	A8IGY1	translation [GO:0006412]	cytosolic small ribosomal subunit [GO:0022627]; nucleolus [GO:0005730]	small ribosomal subunit rRNA binding [GO:0070181]; structural constituent of ribosome [GO:0003735]	translation [GO:0006412]	cytosolic small ribosomal subunit [GO:0022627]; nucleolus [GO:0005730]	small ribosomal subunit rRNA binding [GO:0070181]; structural constituent of ribosome [GO:0003735]	20210409_ALS_XL_F50.raw	38237
Intra	Cre09.g397697.t1.1	Cre09.g397697.t1.1	Ribosomal protein L4	Ribosomal protein L4	166	173	KTSKALEILK	1×DSSO [K4]	KIGALPDVEK	1×DSSO [K1]	133.99	133.99	9	TRUE	A8J0I0	A8J0I0	translation [GO:0006412]	cytosolic large ribosomal subunit [GO:0022625]	RNA binding [GO:0003723]; structural constituent of ribosome [GO:0003735]	translation [GO:0006412]	cytosolic large ribosomal subunit [GO:0022625]	RNA binding [GO:0003723]; structural constituent of ribosome [GO:0003735]	20210409_ALS_XL_F58.raw	30059
Intra	Cre06.g275100.t1.2	Cre06.g275100.t1.2	Nucleolin	Nucleolin	172	163	KAAAKDDSDDDEEDSDDDDDDEDMEEAKPAAAK	1×DSSO [K1]	KKAAAPAAAK	1×DSSO [K2]	133.99	133.99	1	TRUE	A0A2K3DNK6	A0A2K3DNK6	NA	ribonucleoprotein complex [GO:1990904]	RNA binding [GO:0003723]	NA	ribonucleoprotein complex [GO:1990904]	RNA binding [GO:0003723]	20210409_ALS_XL_F60.raw	11262
Intra	Cre06.g306300.t1.2	Cre06.g306300.t1.2	Magnesium chelatase subunit I, isoform 1	Magnesium chelatase subunit I, isoform 1	167	207	VKAGEQLPVSSKKIPMVDLPLGATEDR	1×DSSO [K12]; 1×Oxidation [M16]	ALTEGVKAFEPGLLAKANR	1×DSSO [K16]	133.47	91.07	12	TRUE	A8IMZ5	A8IMZ5	chlorophyll biosynthetic process [GO:0015995]; photosynthesis [GO:0015979]	chloroplast stroma [GO:0009570]	ATP binding [GO:0005524]; magnesium chelatase activity [GO:0016851]	chlorophyll biosynthetic process [GO:0015995]; photosynthesis [GO:0015979]	chloroplast stroma [GO:0009570]	ATP binding [GO:0005524]; magnesium chelatase activity [GO:0016851]	20210409_ALS_XL_F54.raw	29043
Intra	Cre01.g007774.t1.1	Cre01.g007774.t1.1	RING/U-box superfamily protein	RING/U-box superfamily protein	348	340	AKAEAAEEER	1×DSSO [K2]	AKAEAEAR	1×DSSO [K2]	132.72	11.29	1	TRUE	A0A2K3E565	A0A2K3E565	NA	cytoplasm [GO:0005737]; nucleus [GO:0005634]	NA	NA	cytoplasm [GO:0005737]; nucleus [GO:0005634]	NA	20210409_ALS_XL_F56.raw	6873
Intra	Cre12.g498600.t1.2	Cre12.g498600.t1.2	Eukaryotic translation elongation factor 1 alpha	Eukaryotic translation elongation factor 1 alpha	370	309	AGPGDNVGMNIKGLDKGNMPR	1×Oxidation [M9; M19]; 1×DSSO [K12]	IKGVGDVLAGR	1×DSSO [K2]	132.72	123.56	9	FALSE	A0A2K3D3E1	A0A2K3D3E1	translation [GO:0006412]	NA	GTPase activity [GO:0003924]; GTP binding [GO:0005525]	translation [GO:0006412]	NA	GTPase activity [GO:0003924]; GTP binding [GO:0005525]	20210409_ALS_XL_F57.raw	35329
Inter	Cre08.g359750.t1.2	Cre06.g308250.t1.2	Cytosolic 80S ribosomal protein S9	Cytosolic 80S ribosomal protein S4	67	253	VLLTLDEKDPKR	1×DSSO [K8]	LTIIQEQKKR	1×DSSO [K8]	132.48	94.77	7	TRUE	A8JGF8	A8IMP6	positive regulation of translational fidelity [GO:0045903]; translation [GO:0006412]	cytosolic small ribosomal subunit [GO:0022627]; small ribosomal subunit [GO:0015935]	rRNA binding [GO:0019843]; structural constituent of ribosome [GO:0003735]	translation [GO:0006412]	cytosolic small ribosomal subunit [GO:0022627]	RNA binding [GO:0003723]; rRNA binding [GO:0019843]; structural constituent of ribosome [GO:0003735]	20210409_ALS_XL_F53.raw	32959
Intra	Cre10.g438600.t1.2	Cre10.g438600.t1.2	(1 of 1) KOG4766 - Uncharacterized conserved protein	(1 of 1) KOG4766 - Uncharacterized conserved protein	17	33	KADKDYDDSDLEFLAK	1×DSSO [K1]	KKAEEAALK	1×DSSO [K1]	132.48	100.72	2	TRUE	A0A2K3DAC3	A0A2K3DAC3	cytoplasmic translation [GO:0002181]	NA	NA	cytoplasmic translation [GO:0002181]	NA	NA	20210409_ALS_XL_F61.raw	27423
Intra	Cre06.g275100.t1.2	Cre06.g275100.t1.2	Nucleolin	Nucleolin	25	20	KKPEPESDSDEESDDSDDSDDAPAVKK	1×DSSO [K2]	AKQAATKLEK	1×DSSO [K7]	132.01	132.01	2	TRUE	A0A2K3DNK6	A0A2K3DNK6	NA	ribonucleoprotein complex [GO:1990904]	RNA binding [GO:0003723]	NA	ribonucleoprotein complex [GO:1990904]	RNA binding [GO:0003723]	20210409_ALS_XL_F62.raw	12492
Intra	Cre11.g481000.t1.2	Cre11.g481000.t1.2	Conserved Ser/Thr Protein Kinase	Conserved Ser/Thr Protein Kinase	309	316	AGFPAGHQSPEDIKR	1×DSSO [K14]	IIEEAKGHR	1×DSSO [K6]	130.84	100.19	3	TRUE	A0A2K3D8P8	A0A2K3D8P8	intracellular signal transduction [GO:0035556]; protein phosphorylation [GO:0006468]	cytoplasm [GO:0005737]; nucleus [GO:0005634]	ATP binding [GO:0005524]; protein serine/threonine kinase activity [GO:0004674]	intracellular signal transduction [GO:0035556]; protein phosphorylation [GO:0006468]	cytoplasm [GO:0005737]; nucleus [GO:0005634]	ATP binding [GO:0005524]; protein serine/threonine kinase activity [GO:0004674]	20210409_ALS_XL_F62.raw	19250
Intra	Cre01.g007774.t1.1	Cre01.g007774.t1.1	RING/U-box superfamily protein	RING/U-box superfamily protein	225	240	GAGTSTGATAPPPAAAAGASGSKASAR	1×DSSO [K23]	AAAKAPAAPQQPAAAAAGAK	1×DSSO [K4]	130.46	94.25	2	TRUE	A0A2K3E565	A0A2K3E565	NA	cytoplasm [GO:0005737]; nucleus [GO:0005634]	NA	NA	cytoplasm [GO:0005737]; nucleus [GO:0005634]	NA	20210409_ALS_XL_F41.raw	15400
Intra	Cre04.g221350.t1.2	Cre04.g221350.t1.2	CD2-binding protein-related	CD2-binding protein-related	37	34	KGGENAGPSTAAPAPVRR	1×DSSO [K1]	SLLDEEQASKKQK	1×DSSO [K11]	129.39	119.93	1	TRUE	A0A2K3DUA0	A0A2K3DUA0	NA	U5 snRNP [GO:0005682]	NA	NA	U5 snRNP [GO:0005682]	NA	20210409_ALS_XL_F59.raw	16264
Intra	Cre03.g156050.t1.2	Cre03.g156050.t1.2	ribosome recycling factor, chloroplast precursor	ribosome recycling factor, chloroplast precursor	94	254	IAAEAKKDADER	1×DSSO [K6]	KVEDAAK	1×DSSO [K1]	128.91	128.91	1	TRUE	A0A2K3DW10	A0A2K3DW10	translation [GO:0006412]	mitochondrion [GO:0005739]	ribosomal large subunit binding [GO:0043023]	translation [GO:0006412]	mitochondrion [GO:0005739]	ribosomal large subunit binding [GO:0043023]	20210409_ALS_XL_F59.raw	9065
Intra	Cre05.g233800.t1.2	Cre05.g233800.t1.2	Glycyl-tRNA synthetase	Glycyl-tRNA synthetase	444	524	IDLTAFEKFPEPR	1×DSSO [K8]	KVTEKVTGK	1×DSSO [K5]	128.89	128.89	3	TRUE	A0A2K3DRT1	A0A2K3DRT1	glycyl-tRNA aminoacylation [GO:0006426]; mitochondrial glycyl-tRNA aminoacylation [GO:0070150]	cytoplasm [GO:0005737]; mitochondrion [GO:0005739]	ATP binding [GO:0005524]; glycine-tRNA ligase activity [GO:0004820]; transferase activity [GO:0016740]	glycyl-tRNA aminoacylation [GO:0006426]; mitochondrial glycyl-tRNA aminoacylation [GO:0070150]	cytoplasm [GO:0005737]; mitochondrion [GO:0005739]	ATP binding [GO:0005524]; glycine-tRNA ligase activity [GO:0004820]; transferase activity [GO:0016740]	20210409_ALS_XL_F58.raw	36282
Intra	Cre12.g498600.t1.2	Cre12.g498600.t1.2	Eukaryotic translation elongation factor 1 alpha	Eukaryotic translation elongation factor 1 alpha	307	374	TDAPLRLPISGAYKIK	1×DSSO [K14]	GLDKGNMPR	1×Oxidation [M7]; 1×DSSO [K4]	128.89	87.47	5	FALSE	A0A2K3D3E1	A0A2K3D3E1	translation [GO:0006412]	NA	GTPase activity [GO:0003924]; GTP binding [GO:0005525]	translation [GO:0006412]	NA	GTPase activity [GO:0003924]; GTP binding [GO:0005525]	20210409_ALS_XL_F57.raw	34203
Intra	Cre06.g282800.t1.2	Cre06.g282800.t1.2	Isocitrate lyase	Isocitrate lyase	190	15	VLVPTKEFVQKLTAAR	1×DSSO [K6]	ASNGAAPDRWSNVKR	1×Acetyl [A1]; 1×DSSO [K14]	128.82	78.21	5	TRUE	A8J244	A8J244	glyoxylate cycle [GO:0006097]; tricarboxylic acid cycle [GO:0006099]	glyoxysome [GO:0009514]	isocitrate lyase activity [GO:0004451]; metal ion binding [GO:0046872]	glyoxylate cycle [GO:0006097]; tricarboxylic acid cycle [GO:0006099]	glyoxysome [GO:0009514]	isocitrate lyase activity [GO:0004451]; metal ion binding [GO:0046872]	20210409_ALS_XL_F53.raw	32251
Intra	Cre03.g178450.t1.2	Cre03.g178450.t1.2	Chaperonin 10	Chaperonin 10	23	67	VQAVSKTAGGVLLPESVTQK	1×DSSO [K6]	EGDKVLLPEYGGSQIK	1×DSSO [K4]	128.69	93.38	1	TRUE	A8IDN1	A8IDN1	chaperone cofactor-dependent protein refolding [GO:0051085]	mitochondrial matrix [GO:0005759]	ATPase activity [GO:0016887]; ATP binding [GO:0005524]; chaperone binding [GO:0051087]; metal ion binding [GO:0046872]; unfolded protein binding [GO:0051082]	chaperone cofactor-dependent protein refolding [GO:0051085]	mitochondrial matrix [GO:0005759]	ATPase activity [GO:0016887]; ATP binding [GO:0005524]; chaperone binding [GO:0051087]; metal ion binding [GO:0046872]; unfolded protein binding [GO:0051082]	20210409_ALS_XL_F43.raw	35257
Intra	Cre01.g002300.t1.2	Cre01.g002300.t1.2	Cyclophilin	Cyclophilin	148	141	KVEGYGSSSGK	1×DSSO [K1]	VCKGMDVVK	1×Carbamidomethyl [C2]; 1×Oxidation [M5]; 1×DSSO [K3]	127.95	103.27	1	TRUE	A8JD64	A8JD64	protein folding [GO:0006457]; protein peptidyl-prolyl isomerization [GO:0000413]	cytoplasm [GO:0005737]	cyclosporin A binding [GO:0016018]; peptidyl-prolyl cis-trans isomerase activity [GO:0003755]	protein folding [GO:0006457]; protein peptidyl-prolyl isomerization [GO:0000413]	cytoplasm [GO:0005737]	cyclosporin A binding [GO:0016018]; peptidyl-prolyl cis-trans isomerase activity [GO:0003755]	20210409_ALS_XL_F55.raw	11379
Intra	Cre06.g250100.t1.2	Cre06.g250100.t1.2	Heat shock protein 70B	Heat shock protein 70B	543	197	ITGASTLDKGDVER	1×DSSO [K9]	DAGKIAGLEVLR	1×DSSO [K4]	166.17	115.2	5	FALSE	A8HYV3	A8HYV3	protein folding [GO:0006457]	chloroplast [GO:0009507]	ATPase activity [GO:0016887]; ATP binding [GO:0005524]; unfolded protein binding [GO:0051082]	protein folding [GO:0006457]	chloroplast [GO:0009507]	ATPase activity [GO:0016887]; ATP binding [GO:0005524]; unfolded protein binding [GO:0051082]	20210409_ALS_XL_F50.raw	35999
Intra	Cre01.g007774.t1.1	Cre01.g007774.t1.1	RING/U-box superfamily protein	RING/U-box superfamily protein	374	367	KKAEEDAAAEAK	1×DSSO [K1]	RKAEAEAK	1×DSSO [K2]	127.53	127.53	3	FALSE	A0A2K3E565	A0A2K3E565	NA	cytoplasm [GO:0005737]; nucleus [GO:0005634]	NA	NA	cytoplasm [GO:0005737]; nucleus [GO:0005634]	NA	20210409_ALS_XL_F59.raw	5424
Intra	Cre07.g314150.t1.2	Cre07.g314150.t1.2	Zeta-carotene desaturase	Zeta-carotene desaturase	57	70	AQASDVNAVGLKDVPLR	1×DSSO [K12]	SLFPDEPKPPAPGAPK	1×DSSO [K8]	127.46	98.8	1	TRUE	A8I647	A8I647	carotene biosynthetic process [GO:0016120]; carotenoid biosynthetic process [GO:0016117]	chloroplast [GO:0009507]; chromoplast [GO:0009509]	7,9,9'-tricis-neurosporene:quinone oxidoreductase activity [GO:0052887]; 9,9'-dicis-carotene:quinone oxidoreductase activity [GO:0052886]; carotene 7,8-desaturase activity [GO:0016719]; oxidoreductase activity [GO:0016491]	carotene biosynthetic process [GO:0016120]; carotenoid biosynthetic process [GO:0016117]	chloroplast [GO:0009507]; chromoplast [GO:0009509]	7,9,9'-tricis-neurosporene:quinone oxidoreductase activity [GO:0052887]; 9,9'-dicis-carotene:quinone oxidoreductase activity [GO:0052886]; carotene 7,8-desaturase activity [GO:0016719]; oxidoreductase activity [GO:0016491]	20210409_ALS_XL_F45.raw	36270
Inter	Cre14.g630100.t1.2	Cre02.g115200.t1.2	Cytosolic 80S ribosomal protein L12	Cytosolic 80S ribosomal protein L27a	174	94	VTSEMKATAGKELAEIK	1×DSSO [K6]	EQAAKDKSSAAVIDVTK	1×DSSO [K7]	127.19	127.19	2	TRUE	A8IUV7	A8I2T0	translation [GO:0006412]	cytosolic large ribosomal subunit [GO:0022625]	RNA binding [GO:0003723]; structural constituent of ribosome [GO:0003735]	translation [GO:0006412]	cytosolic large ribosomal subunit [GO:0022625]	structural constituent of ribosome [GO:0003735]	20210409_ALS_XL_F56.raw	31696
Intra	Cre06.g254400.t1.1	Cre06.g254400.t1.1	Fumarate hydratase	Fumarate hydratase	457	448	LAAGKGLPQYAK	1×DSSO [K5]	DIAHAKLQER	1×DSSO [K6]	127.19	73.87	1	TRUE	A8HYA9	A8HYA9	generation of precursor metabolites and energy [GO:0006091]	NA	4 iron, 4 sulfur cluster binding [GO:0051539]; fumarate hydratase activity [GO:0004333]; metal ion binding [GO:0046872]	generation of precursor metabolites and energy [GO:0006091]	NA	4 iron, 4 sulfur cluster binding [GO:0051539]; fumarate hydratase activity [GO:0004333]; metal ion binding [GO:0046872]	20210409_ALS_XL_F58.raw	23982
Inter	Cre02.g115200.t1.2	Cre12.g484050.t1.2	Cytosolic 80S ribosomal protein L27a	Cytosolic 80S ribosomal protein L36	124	1	GQLPEQPVVVKAK	1×DSSO [K11]	VATGLAVGLNK	1×DSSO [V1]	127.03	80.47	3	TRUE	A8I2T0	A8JHU2	translation [GO:0006412]	cytosolic large ribosomal subunit [GO:0022625]	structural constituent of ribosome [GO:0003735]	cytoplasmic translation [GO:0002181]	cytosolic large ribosomal subunit [GO:0022625]	structural constituent of ribosome [GO:0003735]	20210409_ALS_XL_F34.raw	27950
Intra	Cre06.g275100.t1.2	Cre06.g275100.t1.2	Nucleolin	Nucleolin	49	15	KKPEPESDSDEESDDSDDSDDAPAVKK	1×DSSO [K26]	AKQAATKLEK	1×DSSO [K2]	126.85	82.4	2	TRUE	A0A2K3DNK6	A0A2K3DNK6	NA	ribonucleoprotein complex [GO:1990904]	RNA binding [GO:0003723]	NA	ribonucleoprotein complex [GO:1990904]	RNA binding [GO:0003723]	20210409_ALS_XL_F63.raw	12349
Intra	Cre02.g080200.t1.2	Cre02.g080200.t1.2	Transketolase	Transketolase	449	291	ISGDFQKGSYAER	1×DSSO [K7]	AVKDKPTLIK	1×DSSO [K5]	126.68	126.68	3	TRUE	A8IAN1	A8IAN1	pentose-phosphate shunt [GO:0006098]	cytosol [GO:0005829]	metal ion binding [GO:0046872]; transketolase activity [GO:0004802]	pentose-phosphate shunt [GO:0006098]	cytosol [GO:0005829]	metal ion binding [GO:0046872]; transketolase activity [GO:0004802]	20210409_ALS_XL_F58.raw	23238
Intra	Cre04.g215850.t1.2	Cre04.g215850.t1.2	Importin alpha	Importin alpha	24	14	KREDNIIALR	1×DSSO [K1]	KGIDAEEAR	1×DSSO [K1]	126.68	51.36	1	TRUE	A8J9Q1	A8J9Q1	NLS-bearing protein import into nucleus [GO:0006607]	cytoplasm [GO:0005737]; nucleus [GO:0005634]	nuclear import signal receptor activity [GO:0061608]; nuclear localization sequence binding [GO:0008139]	NLS-bearing protein import into nucleus [GO:0006607]	cytoplasm [GO:0005737]; nucleus [GO:0005634]	nuclear import signal receptor activity [GO:0061608]; nuclear localization sequence binding [GO:0008139]	20210409_ALS_XL_F61.raw	23888
Intra	Cre12.g510800.t1.2	Cre12.g510800.t1.2	Magnesium chelatase subunit I, isoform 2	Magnesium chelatase subunit I, isoform 2	406	400	AEGKADRPTGAK	1×DSSO [K4]	EEAAAKAK	1×DSSO [K6]	126.38	10.25	1	FALSE	A8IKQ6	A8IKQ6	chlorophyll biosynthetic process [GO:0015995]; photosynthesis [GO:0015979]	chloroplast stroma [GO:0009570]	ATP binding [GO:0005524]; magnesium chelatase activity [GO:0016851]	chlorophyll biosynthetic process [GO:0015995]; photosynthesis [GO:0015979]	chloroplast stroma [GO:0009570]	ATP binding [GO:0005524]; magnesium chelatase activity [GO:0016851]	20210409_ALS_XL_F59.raw	5597
Intra	Cre02.g088900.t1.2	Cre02.g088900.t1.2	Chloroplast ribosomal protein L1	Chloroplast ribosomal protein L1	295	84	IGVSALQNTKGKAE	1×DSSO [K12]	TSELDPKEAIR	1×DSSO [K7]	126.24	108.27	1	TRUE	A8I8Z4	A8I8Z4	maturation of LSU-rRNA [GO:0000470]; translation [GO:0006412]	cytosolic large ribosomal subunit [GO:0022625]	RNA binding [GO:0003723]; rRNA binding [GO:0019843]; structural constituent of ribosome [GO:0003735]	maturation of LSU-rRNA [GO:0000470]; translation [GO:0006412]	cytosolic large ribosomal subunit [GO:0022625]	RNA binding [GO:0003723]; rRNA binding [GO:0019843]; structural constituent of ribosome [GO:0003735]	20210409_ALS_XL_F53.raw	28891
Intra	Cre06.g275100.t1.2	Cre06.g275100.t1.2	Nucleolin	Nucleolin	121	90	GKPAAAPAAAAK	1×DSSO [K2]	AAPAAKAAAK	1×DSSO [K6]	125.79	18.29	1	TRUE	A0A2K3DNK6	A0A2K3DNK6	NA	ribonucleoprotein complex [GO:1990904]	RNA binding [GO:0003723]	NA	ribonucleoprotein complex [GO:1990904]	RNA binding [GO:0003723]	20210409_ALS_XL_F52.raw	10048
Intra	Cre07.g339700.t1.2	Cre07.g339700.t1.2	Iron-sulfur cluster assembly protein	Iron-sulfur cluster assembly protein	245	75	SDDTGVLMVTHYKR	1×Oxidation [M8]; 1×DSSO [K13]	NGEVHAIMGKNGSGK	1×Oxidation [M8]; 1×DSSO [K10]	125.58	98.56	1	TRUE	A8ITJ3	A8ITJ3	thylakoid membrane organization [GO:0010027]	chloroplast stroma [GO:0009570]	ATPase activity [GO:0016887]; ATPase-coupled transmembrane transporter activity [GO:0042626]; ATP binding [GO:0005524]	thylakoid membrane organization [GO:0010027]	chloroplast stroma [GO:0009570]	ATPase activity [GO:0016887]; ATPase-coupled transmembrane transporter activity [GO:0042626]; ATP binding [GO:0005524]	20210409_ALS_XL_F61.raw	22147
Intra	Cre02.g112600.t1.2	Cre02.g112600.t1.2	(1 of 3) PTHR13780//PTHR13780:SF49 - AMP-ACTIVATED PROTEIN KINASE, GAMMA REGULATORY SUBUNIT // SUBFAMILY NOT NAMED	(1 of 3) PTHR13780//PTHR13780:SF49 - AMP-ACTIVATED PROTEIN KINASE, GAMMA REGULATORY SUBUNIT // SUBFAMILY NOT NAMED	1	436	GLQEVLSEATAK	1×DSSO [G1]	LLAGTKGPAPKP	1×DSSO [K6]	124.93	124.93	3	TRUE	A0A2K3E328	A0A2K3E328	NA	NA	NA	NA	NA	NA	20210409_ALS_XL_F36.raw	37311
Intra	Cre16.g691000.t1.2	Cre16.g691000.t1.2	Organellar elongation factor P	Organellar elongation factor P	99	74	AGEQVNTADVQKR	1×DSSO [K12]	LKNFLTGGVVEK	1×DSSO [K2]	124.59	85.62	2	TRUE	A0A2K3CSJ6	A0A2K3CSJ6	NA	cytoplasm [GO:0005737]	translation elongation factor activity [GO:0003746]	NA	cytoplasm [GO:0005737]	translation elongation factor activity [GO:0003746]	20210409_ALS_XL_F53.raw	29785
Intra	Cre06.g275100.t1.2	Cre06.g275100.t1.2	Nucleolin	Nucleolin	24	20	KKPEPESDSDEESDDSDDSDDAPAVKK	1×DSSO [K1]	AKQAATKLEK	1×DSSO [K7]	124.32	124.32	1	TRUE	A0A2K3DNK6	A0A2K3DNK6	NA	ribonucleoprotein complex [GO:1990904]	RNA binding [GO:0003723]	NA	ribonucleoprotein complex [GO:1990904]	RNA binding [GO:0003723]	20210409_ALS_XL_F62.raw	11735
Intra	Cre10.g438600.t1.2	Cre10.g438600.t1.2	(1 of 1) KOG4766 - Uncharacterized conserved protein	(1 of 1) KOG4766 - Uncharacterized conserved protein	20	34	KADKDYDDSDLEFLAK	1×DSSO [K4]	KKAEEAALK	1×DSSO [K2]	124.12	124.12	1	TRUE	A0A2K3DAC3	A0A2K3DAC3	cytoplasmic translation [GO:0002181]	NA	NA	cytoplasmic translation [GO:0002181]	NA	NA	20210409_ALS_XL_F62.raw	29317
Intra	Cre06.g269950.t1.2	Cre06.g269950.t1.2	Cell Division Cycle protein 48	Cell Division Cycle protein 48	621	670	VLNQLLTEMDGMNSKK	2×Oxidation [M9; M12]; 1×DSSO [K15]	KSPIAPDVDFDTLVK	1×DSSO [K1]	123.72	90.29	2	TRUE	A8HW56	A8HW56	autophagosome maturation [GO:0097352]; ER-associated misfolded protein catabolic process [GO:0071712]; mitotic spindle disassembly [GO:0051228]; retrograde protein transport, ER to cytosol [GO:0030970]; ubiquitin-dependent ERAD pathway [GO:0030433]	cytosol [GO:0005829]; motile cilium [GO:0031514]; nucleus [GO:0005634]; VCP-NPL4-UFD1 AAA ATPase complex [GO:0034098]	ATPase activity [GO:0016887]; ATP binding [GO:0005524]; polyubiquitin modification-dependent protein binding [GO:0031593]	autophagosome maturation [GO:0097352]; ER-associated misfolded protein catabolic process [GO:0071712]; mitotic spindle disassembly [GO:0051228]; retrograde protein transport, ER to cytosol [GO:0030970]; ubiquitin-dependent ERAD pathway [GO:0030433]	cytosol [GO:0005829]; motile cilium [GO:0031514]; nucleus [GO:0005634]; VCP-NPL4-UFD1 AAA ATPase complex [GO:0034098]	ATPase activity [GO:0016887]; ATP binding [GO:0005524]; polyubiquitin modification-dependent protein binding [GO:0031593]	20210409_ALS_XL_F46.raw	41408
Intra	Cre03.g193750.t1.1	Cre03.g193750.t1.1	Glycine cleavage system, T protein	Glycine cleavage system, T protein	167	175	DKDLAHLSKHLAAAK	1×DSSO [K9]	SKGLDVAMTVHDDR	1×Oxidation [M8]; 1×DSSO [K2]	123.69	123.69	5	TRUE	A0A2K3DYI9	A0A2K3DYI9	glycine decarboxylation via glycine cleavage system [GO:0019464]	mitochondrion [GO:0005739]	aminomethyltransferase activity [GO:0004047]; transaminase activity [GO:0008483]	glycine decarboxylation via glycine cleavage system [GO:0019464]	mitochondrion [GO:0005739]	aminomethyltransferase activity [GO:0004047]; transaminase activity [GO:0008483]	20210409_ALS_XL_F67.raw	29751
Intra	Cre02.g120100.t1.2	Cre02.g120100.t1.2	ribulose-1,5-bisphosphate carboxylase/oxygenase small subunit 1	ribulose-1,5-bisphosphate carboxylase/oxygenase small subunit 1	143	182	EIVACTKAFPDAYVR	1×Carbamidomethyl [C5]; 1×DSSO [K7]	DFQPANKR	1×DSSO [K7]	123.53	75.25	5	FALSE	P00873	P00873	carbon fixation [GO:0015977]; photorespiration [GO:0009853]; photosynthesis [GO:0015979]	chloroplast [GO:0009507]	monooxygenase activity [GO:0004497]; ribulose-bisphosphate carboxylase activity [GO:0016984]	carbon fixation [GO:0015977]; photorespiration [GO:0009853]; photosynthesis [GO:0015979]	chloroplast [GO:0009507]	monooxygenase activity [GO:0004497]; ribulose-bisphosphate carboxylase activity [GO:0016984]	20210409_ALS_XL_F54.raw	31311
Intra	Cre12.g516200.t1.2	Cre12.g516200.t1.2	Ribosomal protein S5/Elongation Factor G/III/V family protein	Ribosomal protein S5/Elongation Factor G/III/V family protein	498	484	VAVEPKNASDLPK	1×DSSO [K6]	AMKFSVSPVVR	1×Oxidation [M2]; 1×DSSO [K3]	123.13	91.2	3	TRUE	A8JHX9	A8JHX9	translational elongation [GO:0006414]	ribonucleoprotein complex [GO:1990904]	GTPase activity [GO:0003924]; GTP binding [GO:0005525]; ribosome binding [GO:0043022]; translation elongation factor activity [GO:0003746]	translational elongation [GO:0006414]	ribonucleoprotein complex [GO:1990904]	GTPase activity [GO:0003924]; GTP binding [GO:0005525]; ribosome binding [GO:0043022]; translation elongation factor activity [GO:0003746]	20210409_ALS_XL_F51.raw	32771
Inter	Cre06.g306300.t1.2	Cre11.g477733.t1.2	Magnesium chelatase subunit I, isoform 1	None	70	19	TEKELGQARPIFPFTAIVGQDEMK	1×Oxidation [M23]; 1×DSSO [K3]	RAEEVKAAEGR	1×DSSO [K6]	122.98	67.61	10	TRUE	A8IMZ5	A0A2K3D8F6	chlorophyll biosynthetic process [GO:0015995]; photosynthesis [GO:0015979]	chloroplast stroma [GO:0009570]	ATP binding [GO:0005524]; magnesium chelatase activity [GO:0016851]	NA	NA	NA	20210409_ALS_XL_F42.raw	42014
Intra	Cre06.g293950.t1.2	Cre06.g293950.t1.2	Serine hydroxymethyltransferase	Serine hydroxymethyltransferase	1	488	VGQQNGHASGFVTPAMTAVFPEAHTR	1×Oxidation [M16]; 1×DSSO [V1]	FPMPGFTVPAAEAK	1×Oxidation [M3]; 1×DSSO [K14]	122.94	85.79	5	TRUE	A0A2K3DQH9	A0A2K3DQH9	folic acid metabolic process [GO:0046655]; glycine biosynthetic process from serine [GO:0019264]; L-serine catabolic process [GO:0006565]; one-carbon metabolic process [GO:0006730]; tetrahydrofolate interconversion [GO:0035999]; tetrahydrofolate metabolic process [GO:0046653]	cytoplasm [GO:0005737]	cobalt ion binding [GO:0050897]; glycine hydroxymethyltransferase activity [GO:0004372]; pyridoxal phosphate binding [GO:0030170]; serine binding [GO:0070905]; zinc ion binding [GO:0008270]	folic acid metabolic process [GO:0046655]; glycine biosynthetic process from serine [GO:0019264]; L-serine catabolic process [GO:0006565]; one-carbon metabolic process [GO:0006730]; tetrahydrofolate interconversion [GO:0035999]; tetrahydrofolate metabolic process [GO:0046653]	cytoplasm [GO:0005737]	cobalt ion binding [GO:0050897]; glycine hydroxymethyltransferase activity [GO:0004372]; pyridoxal phosphate binding [GO:0030170]; serine binding [GO:0070905]; zinc ion binding [GO:0008270]	20210409_ALS_XL_F44.raw	38996
Intra	Cre07.g337650.t1.2	Cre07.g337650.t1.2	Mitochondrial pyruvate dehydrogenase complex, E1 component, alpha subunit	Mitochondrial pyruvate dehydrogenase complex, E1 component, alpha subunit	336	343	RLLLNNGVDPADLKK	1×DSSO [K14]	IDKEVKK	1×DSSO [K6]	122.76	63.48	2	TRUE	A0A2K3DKC3	A0A2K3DKC3	acetyl-CoA biosynthetic process from pyruvate [GO:0006086]	mitochondrial pyruvate dehydrogenase complex [GO:0005967]	pyruvate dehydrogenase (acetyl-transferring) activity [GO:0004739]	acetyl-CoA biosynthetic process from pyruvate [GO:0006086]	mitochondrial pyruvate dehydrogenase complex [GO:0005967]	pyruvate dehydrogenase (acetyl-transferring) activity [GO:0004739]	20210409_ALS_XL_F63.raw	24988
Intra	Cre11.g478800.t1.2	Cre11.g478800.t1.2	None	None	517	582	AAPSTSAPAKEEER	1×DSSO [K10]	AAPAPAKEEEK	1×DSSO [K7]	122.35	75.03	1	TRUE	A0A2K3D8I4	A0A2K3D8I4	intracellular mRNA localization [GO:0008298]	endoplasmic reticulum [GO:0005783]; nuclear outer membrane-endoplasmic reticulum membrane network [GO:0042175]; ribonucleoprotein complex [GO:1990904]	NA	intracellular mRNA localization [GO:0008298]	endoplasmic reticulum [GO:0005783]; nuclear outer membrane-endoplasmic reticulum membrane network [GO:0042175]; ribonucleoprotein complex [GO:1990904]	NA	20210409_ALS_XL_F51.raw	11869
Intra	Cre11.g478800.t1.2	Cre11.g478800.t1.2	None	None	517	528	AAPSTSAPAKEEER	1×DSSO [K10]	AAPAPAKEEK	1×DSSO [K7]	121.9	60.22	1	TRUE	A0A2K3D8I4	A0A2K3D8I4	intracellular mRNA localization [GO:0008298]	endoplasmic reticulum [GO:0005783]; nuclear outer membrane-endoplasmic reticulum membrane network [GO:0042175]; ribonucleoprotein complex [GO:1990904]	NA	intracellular mRNA localization [GO:0008298]	endoplasmic reticulum [GO:0005783]; nuclear outer membrane-endoplasmic reticulum membrane network [GO:0042175]; ribonucleoprotein complex [GO:1990904]	NA	20210409_ALS_XL_F52.raw	11011
Inter	Cre11.g467578.t1.1	Cre12.g537800.t1.2	Ribosomal L28e protein family	Cytosolic 80S ribosomal protein L7	67	1	VKNASKPSVSK	1×DSSO [K2]	STVVPELLAK	1×DSSO [S1]	121.9	49.95	3	TRUE	A0A2K3D7C4	A0A2K3D598	translation [GO:0006412]	cytosolic large ribosomal subunit [GO:0022625]	structural constituent of ribosome [GO:0003735]	maturation of LSU-rRNA from tricistronic rRNA transcript (SSU-rRNA, 5.8S rRNA, LSU-rRNA) [GO:0000463]	cytosolic large ribosomal subunit [GO:0022625]	RNA binding [GO:0003723]; structural constituent of ribosome [GO:0003735]	20210409_ALS_XL_F52.raw	26797
Intra	Cre01.g004500.t1.2	Cre01.g004500.t1.2	Isopropylmalate dehydratase, large subunit	Isopropylmalate dehydratase, large subunit	63	43	ILANHSDNSAVKPGDNIWTK	1×DSSO [K12]	APSSTGSVKR	1×DSSO [K9]	121.9	134.44	1	TRUE	A8JG03	A8JG03	glucosinolate biosynthetic process [GO:0019761]; leucine biosynthetic process [GO:0009098]; response to cadmium ion [GO:0046686]	chloroplast stroma [GO:0009570]	3-isopropylmalate dehydratase activity [GO:0003861]; 4 iron, 4 sulfur cluster binding [GO:0051539]; intramolecular transferase activity, transferring hydroxy groups [GO:0050486]; metal ion binding [GO:0046872]	glucosinolate biosynthetic process [GO:0019761]; leucine biosynthetic process [GO:0009098]; response to cadmium ion [GO:0046686]	chloroplast stroma [GO:0009570]	3-isopropylmalate dehydratase activity [GO:0003861]; 4 iron, 4 sulfur cluster binding [GO:0051539]; intramolecular transferase activity, transferring hydroxy groups [GO:0050486]; metal ion binding [GO:0046872]	20210409_ALS_XL_F57.raw	20692
Intra	Cre06.g275100.t1.2	Cre06.g275100.t1.2	Nucleolin	Nucleolin	25	15	KKPEPESDSDEESDDSDDSDDAPAVKK	1×DSSO [K2]	AKQAATKLEK	1×DSSO [K2]	121.77	121.77	1	TRUE	A0A2K3DNK6	A0A2K3DNK6	NA	ribonucleoprotein complex [GO:1990904]	RNA binding [GO:0003723]	NA	ribonucleoprotein complex [GO:1990904]	RNA binding [GO:0003723]	20210409_ALS_XL_F61.raw	11087
Intra	Cre10.g436350.t1.1	Cre10.g436350.t1.1	Shikimate kinase	Shikimate kinase	220	241	DGIEKRPLLAADAPEGADMQQVAK	1×Oxidation [M19]; 1×DSSO [K5]	TKLDALLEDR	1×DSSO [K2]	121.68	58.84	1	TRUE	A0A2K3DA77	A0A2K3DA77	cellular amino acid biosynthetic process [GO:0008652]; chorismate biosynthetic process [GO:0009423]	NA	ATP binding [GO:0005524]; shikimate kinase activity [GO:0004765]	cellular amino acid biosynthetic process [GO:0008652]; chorismate biosynthetic process [GO:0009423]	NA	ATP binding [GO:0005524]; shikimate kinase activity [GO:0004765]	20210409_ALS_XL_F56.raw	38145
Intra	Cre06.g275100.t1.2	Cre06.g275100.t1.2	Nucleolin	Nucleolin	49	59	KKPEPESDSDEESDDSDDSDDAPAVKK	1×DSSO [K26]	AAPAKAPAKK	1×DSSO [K9]	121.68	121.68	2	TRUE	A0A2K3DNK6	A0A2K3DNK6	NA	ribonucleoprotein complex [GO:1990904]	RNA binding [GO:0003723]	NA	ribonucleoprotein complex [GO:1990904]	RNA binding [GO:0003723]	20210409_ALS_XL_F62.raw	10835
Intra	Cre07.g334900.t1.1	Cre07.g334900.t1.1	None	None	1182	1174	AKAEAEEK	1×DSSO [K2]	AKAAAEAK	1×DSSO [K2]	121.43	17.05	1	TRUE	A0A2K3DK43	A0A2K3DK43	signal transduction [GO:0007165]	membrane [GO:0016020]	NA	signal transduction [GO:0007165]	membrane [GO:0016020]	NA	20210409_ALS_XL_F56.raw	4394
Intra	Cre01.g019250.t1.2	Cre01.g019250.t1.2	GDP-D-mannose 3',5'-epimerase	GDP-D-mannose 3',5'-epimerase	356	376	GVDATKYSHSTIVQTSAPIELGSLR	1×DSSO [K6]	KADGEEGFE	1×DSSO [K1]	121.06	103.64	1	TRUE	A8HPS2	A8HPS2	NA	cytosol [GO:0005829]	GDP-mannose 3,5-epimerase activity [GO:0047918]; NAD binding [GO:0051287]	NA	cytosol [GO:0005829]	GDP-mannose 3,5-epimerase activity [GO:0047918]; NAD binding [GO:0051287]	20210409_ALS_XL_F48.raw	37376
Intra	Cre01.g011000.t1.2	Cre01.g011000.t1.2	Cytosolic 80S ribosomal protein L6	Cytosolic 80S ribosomal protein L6	64	47	FYPADDVPKPLSHNAVHKQTK	1×DSSO [K9]	AVAKQAEGK	1×DSSO [K4]	121.06	121.06	2	TRUE	A8HP90	A8HP90	cytoplasmic translation [GO:0002181]; ribosomal large subunit assembly [GO:0000027]	cytosolic large ribosomal subunit [GO:0022625]	RNA binding [GO:0003723]; structural constituent of ribosome [GO:0003735]	cytoplasmic translation [GO:0002181]; ribosomal large subunit assembly [GO:0000027]	cytosolic large ribosomal subunit [GO:0022625]	RNA binding [GO:0003723]; structural constituent of ribosome [GO:0003735]	20210409_ALS_XL_F63.raw	20482
Intra	Cre09.g396213.t1.1	Cre09.g396213.t1.1	Photosystem II Oxygen Evolution Enhancer protein 1	Photosystem II Oxygen Evolution Enhancer protein 1	189	113	GTLDNIKGDFLVPSYR	1×DSSO [K7]	EESQFKGGETEFVK	1×DSSO [K6]	120.92	76.94	1	TRUE	A8J0E4	A8J0E4	photosystem II assembly [GO:0010207]; photosystem II stabilization [GO:0042549]	photosystem II oxygen evolving complex [GO:0009654]	oxygen evolving activity [GO:0010242]	photosystem II assembly [GO:0010207]; photosystem II stabilization [GO:0042549]	photosystem II oxygen evolving complex [GO:0009654]	oxygen evolving activity [GO:0010242]	20210409_ALS_XL_F52.raw	42169
Intra	Cre12.g494850.t1.2	Cre12.g494850.t1.2	Adenylate kinase	Adenylate kinase	171	193	RLDPQTGAIYHLKYSPPPADIVSR	1×DSSO [K13]	SDDTEDKCR	1×Carbamidomethyl [C8]; 1×DSSO [K7]	120.76	103.87	1	TRUE	A8JDN2	A8JDN2	nucleoside diphosphate phosphorylation [GO:0006165]; nucleoside triphosphate biosynthetic process [GO:0009142]	chloroplast [GO:0009507]; cytoplasm [GO:0005737]	adenylate kinase activity [GO:0004017]; ATP binding [GO:0005524]; cytidylate kinase activity [GO:0004127]; nucleoside diphosphate kinase activity [GO:0004550]	nucleoside diphosphate phosphorylation [GO:0006165]; nucleoside triphosphate biosynthetic process [GO:0009142]	chloroplast [GO:0009507]; cytoplasm [GO:0005737]	adenylate kinase activity [GO:0004017]; ATP binding [GO:0005524]; cytidylate kinase activity [GO:0004127]; nucleoside diphosphate kinase activity [GO:0004550]	20210409_ALS_XL_F60.raw	32259
Intra	Cre06.g278148.t1.1	Cre06.g278148.t1.1	glyoxylate reductase 2	glyoxylate reductase 2	209	319	ARGGAFLEAPVSGSKGPAEQGK	1×DSSO [K15]	AYAPAFPLKHQQK	1×DSSO [K9]	120.68	66.73	1	TRUE	A0A2K3DP15	A0A2K3DP15	NA	NA	NAD binding [GO:0051287]; NADP binding [GO:0050661]; oxidoreductase activity, acting on the CH-OH group of donors, NAD or NADP as acceptor [GO:0016616]	NA	NA	NAD binding [GO:0051287]; NADP binding [GO:0050661]; oxidoreductase activity, acting on the CH-OH group of donors, NAD or NADP as acceptor [GO:0016616]	20210409_ALS_XL_F59.raw	29793
Intra	Cre16.g683550.t1.2	Cre16.g683550.t1.2	P450 reductase 1	P450 reductase 1	932	940	AAAEKEAAEK	1×DSSO [K5]	AAKEPAEK	1×DSSO [K3]	120.06	7.5	1	TRUE	A0A2K3CUX5	A0A2K3CUX5	homocysteine metabolic process [GO:0050667]; methionine biosynthetic process [GO:0009086]	cytosol [GO:0005829]	[methionine synthase] reductase activity [GO:0030586]; flavin adenine dinucleotide binding [GO:0050660]; FMN binding [GO:0010181]; oxidoreductase activity [GO:0016491]; oxidoreductase activity, acting on paired donors, with incorporation or reduction of molecular oxygen, NAD(P)H as one donor, and incorporation of one atom of oxygen [GO:0016709]	homocysteine metabolic process [GO:0050667]; methionine biosynthetic process [GO:0009086]	cytosol [GO:0005829]	[methionine synthase] reductase activity [GO:0030586]; flavin adenine dinucleotide binding [GO:0050660]; FMN binding [GO:0010181]; oxidoreductase activity [GO:0016491]; oxidoreductase activity, acting on paired donors, with incorporation or reduction of molecular oxygen, NAD(P)H as one donor, and incorporation of one atom of oxygen [GO:0016709]	20210409_ALS_XL_F55.raw	5740
Intra	Cre08.g372450.t1.2	Cre08.g372450.t1.2	Photosystem II Oxygen Evolution Enhancer protein 3	Photosystem II Oxygen Evolution Enhancer protein 3	148	152	FDLNTLASTKEKEAK	1×DSSO [K12]	KAALGLRK	1×DSSO [K1]	120.06	120.06	15	FALSE	A8JEV1	A8JEV1	photosynthetic electron transport chain [GO:0009767]	chloroplast [GO:0009507]; extrinsic component of membrane [GO:0019898]; photosystem II oxygen evolving complex [GO:0009654]	calcium ion binding [GO:0005509]; electron transporter, transferring electrons within the cyclic electron transport pathway of photosynthesis activity [GO:0045156]	photosynthetic electron transport chain [GO:0009767]	chloroplast [GO:0009507]; extrinsic component of membrane [GO:0019898]; photosystem II oxygen evolving complex [GO:0009654]	calcium ion binding [GO:0005509]; electron transporter, transferring electrons within the cyclic electron transport pathway of photosynthesis activity [GO:0045156]	20210409_ALS_XL_F62.raw	27620
Intra	Cre10.g417700.t1.2	Cre10.g417700.t1.2	Cytosolic 80S ribosomal protein L3	Cytosolic 80S ribosomal protein L3	288	167	KGDASHLATTEFDVTKK	1×DSSO [K1]	VLAHTQVKK	1×DSSO [K8]	120.06	90.56	1	TRUE	A8ID84	A8ID84	ribosomal large subunit assembly [GO:0000027]; translation [GO:0006412]	cytosolic large ribosomal subunit [GO:0022625]	RNA binding [GO:0003723]; structural constituent of ribosome [GO:0003735]	ribosomal large subunit assembly [GO:0000027]; translation [GO:0006412]	cytosolic large ribosomal subunit [GO:0022625]	RNA binding [GO:0003723]; structural constituent of ribosome [GO:0003735]	20210409_ALS_XL_F63.raw	19405
Intra	Cre03.g189950.t1.2	Cre03.g189950.t1.2	HSP70-HSP90 organizing protein	HSP70-HSP90 organizing protein	262	260	KEFETAIAHYNK	1×DSSO [K1]	EKELGNEAYKK	1×DSSO [K10]	119.89	72.93	3	TRUE	A0A2K3DY96	A0A2K3DY96	NA	chloroplast [GO:0009507]; thylakoid [GO:0009579]	Hsp90 protein binding [GO:0051879]	NA	chloroplast [GO:0009507]; thylakoid [GO:0009579]	Hsp90 protein binding [GO:0051879]	20210409_ALS_XL_F63.raw	21744
Intra	Cre07.g349950.t1.1	Cre07.g349950.t1.1	TATA BOX ASSOCIATED FACTOR II 59	TATA BOX ASSOCIATED FACTOR II 59	601	617	LQQDPKATQVYR	1×DSSO [K6]	MIVADPVSDKSR	1×Oxidation [M1]; 1×DSSO [K10]	119.56	77.66	1	TRUE	A0A2K3DL83	A0A2K3DL83	histone acetylation [GO:0016573]; positive regulation of transcription by RNA polymerase II [GO:0045944]; transcription initiation from RNA polymerase II promoter [GO:0006367]	SAGA complex [GO:0000124]; SLIK (SAGA-like) complex [GO:0046695]; transcription factor TFIID complex [GO:0005669]	protein heterodimerization activity [GO:0046982]; RNA polymerase II general transcription initiation factor activity [GO:0016251]; transcription coactivator activity [GO:0003713]	histone acetylation [GO:0016573]; positive regulation of transcription by RNA polymerase II [GO:0045944]; transcription initiation from RNA polymerase II promoter [GO:0006367]	SAGA complex [GO:0000124]; SLIK (SAGA-like) complex [GO:0046695]; transcription factor TFIID complex [GO:0005669]	protein heterodimerization activity [GO:0046982]; RNA polymerase II general transcription initiation factor activity [GO:0016251]; transcription coactivator activity [GO:0003713]	20210409_ALS_XL_F53.raw	23600
Intra	Cre07.g331550.t1.2	Cre07.g331550.t1.2	Phosphoserine aminotransferase	Phosphoserine aminotransferase	149	166	AGETVDYVVTGAWSKK	1×DSSO [K15]	VNIAAKGDNK	1×DSSO [K6]	118.42	83.7	3	TRUE	A8IH03	A8IH03	L-serine biosynthetic process [GO:0006564]	chloroplast stroma [GO:0009570]; cytoplasm [GO:0005737]	O-phospho-L-serine:2-oxoglutarate aminotransferase activity [GO:0004648]; pyridoxal phosphate binding [GO:0030170]	L-serine biosynthetic process [GO:0006564]	chloroplast stroma [GO:0009570]; cytoplasm [GO:0005737]	O-phospho-L-serine:2-oxoglutarate aminotransferase activity [GO:0004648]; pyridoxal phosphate binding [GO:0030170]	20210409_ALS_XL_F53.raw	32383
Intra	Cre01.g044800.t1.2	Cre01.g044800.t1.2	Pyruvate-formate lyase	Pyruvate-formate lyase	239	690	KSGILSGLPDGYGR	1×DSSO [K1]	KTGSTPDGRK	1×DSSO [K1]	118.42	76.19	4	TRUE	A0A2K3E7P1	A0A2K3E7P1	carbohydrate metabolic process [GO:0005975]; threonine catabolic process [GO:0006567]	cytosol [GO:0005829]	formate C-acetyltransferase activity [GO:0008861]	carbohydrate metabolic process [GO:0005975]; threonine catabolic process [GO:0006567]	cytosol [GO:0005829]	formate C-acetyltransferase activity [GO:0008861]	20210409_ALS_XL_F59.raw	24924
Intra	Cre14.g617900.t1.2	Cre14.g617900.t1.2	Cytosolic 80S ribosomal protein L35	Cytosolic 80S ribosomal protein L35	14	72	NMSKQDLITR	1×Oxidation [M2]; 1×DSSO [K4]	NKIKEENEK	1×DSSO [K2]	118.42	111.69	10	TRUE	A8HNX3	A8HNX3	maturation of LSU-rRNA from tricistronic rRNA transcript (SSU-rRNA, 5.8S rRNA, LSU-rRNA) [GO:0000463]; translation [GO:0006412]	cytosolic large ribosomal subunit [GO:0022625]	mRNA binding [GO:0003729]; structural constituent of ribosome [GO:0003735]	maturation of LSU-rRNA from tricistronic rRNA transcript (SSU-rRNA, 5.8S rRNA, LSU-rRNA) [GO:0000463]; translation [GO:0006412]	cytosolic large ribosomal subunit [GO:0022625]	mRNA binding [GO:0003729]; structural constituent of ribosome [GO:0003735]	20210409_ALS_XL_F60.raw	14617
Intra	Cre05.g234550.t2.1	Cre05.g234550.t2.1	Fructose-1,6-bisphosphate aldolase	Fructose-1,6-bisphosphate aldolase	356	44	AKANSDAQQGKYDATTEGK	1×DSSO [K11]	TAGTVASKGR	1×DSSO [K8]	118.06	67.09	4	TRUE	Q42690	Q42690	fructose 1,6-bisphosphate metabolic process [GO:0030388]; glycolytic process [GO:0006096]	cytosol [GO:0005829]	fructose-bisphosphate aldolase activity [GO:0004332]	fructose 1,6-bisphosphate metabolic process [GO:0030388]; glycolytic process [GO:0006096]	cytosol [GO:0005829]	fructose-bisphosphate aldolase activity [GO:0004332]	20210409_ALS_XL_F54.raw	11653
Intra	Cre06.g306300.t1.2	Cre06.g306300.t1.2	Magnesium chelatase subunit I, isoform 1	Magnesium chelatase subunit I, isoform 1	70	207	TEKELGQARPIFPFTAIVGQDEMK	1×Oxidation [M23]; 1×DSSO [K3]	AFEPGLLAKANR	1×DSSO [K9]	117.62	81.41	8	TRUE	A8IMZ5	A8IMZ5	chlorophyll biosynthetic process [GO:0015995]; photosynthesis [GO:0015979]	chloroplast stroma [GO:0009570]	ATP binding [GO:0005524]; magnesium chelatase activity [GO:0016851]	chlorophyll biosynthetic process [GO:0015995]; photosynthesis [GO:0015979]	chloroplast stroma [GO:0009570]	ATP binding [GO:0005524]; magnesium chelatase activity [GO:0016851]	20210409_ALS_XL_F55.raw	46872
Intra	Cre09.g389430.t1.1	Cre09.g389430.t1.1	phenylalanyl-tRNA synthetase, putative / phenylalanine--tRNA ligase, putative	phenylalanyl-tRNA synthetase, putative / phenylalanine--tRNA ligase, putative	105	117	VKVPGEAGDVGFKQAMQQK	1×Oxidation [M16]; 1×DSSO [K13]	WLALDKSAGEPR	1×DSSO [K6]	117.62	70.18	1	TRUE	A8J168	A8J168	phenylalanyl-tRNA aminoacylation [GO:0006432]	cytoplasm [GO:0005737]; cytosol [GO:0005829]; phenylalanine-tRNA ligase complex [GO:0009328]	ATP binding [GO:0005524]; phenylalanine-tRNA ligase activity [GO:0004826]; tRNA binding [GO:0000049]	phenylalanyl-tRNA aminoacylation [GO:0006432]	cytoplasm [GO:0005737]; cytosol [GO:0005829]; phenylalanine-tRNA ligase complex [GO:0009328]	ATP binding [GO:0005524]; phenylalanine-tRNA ligase activity [GO:0004826]; tRNA binding [GO:0000049]	20210409_ALS_XL_F57.raw	31127
Intra	Cre06.g282000.t2.1	Cre06.g282000.t2.1	Soluble starch synthase III	Soluble starch synthase III	436	429	KAAEAAMEEQAKEFGER	1×Oxidation [M7]; 1×DSSO [K1]	REAEAKAAEEER	1×DSSO [K6]	117.6	61.19	3	FALSE	A0A2K3DPP7	A0A2K3DPP7	starch biosynthetic process [GO:0019252]	NA	glycogen (starch) synthase activity [GO:0004373]; starch binding [GO:2001070]	starch biosynthetic process [GO:0019252]	NA	glycogen (starch) synthase activity [GO:0004373]; starch binding [GO:2001070]	20210409_ALS_XL_F59.raw	8732
Intra	Cre06.g275100.t1.2	Cre06.g275100.t1.2	Nucleolin	Nucleolin	49	55	KKPEPESDSDEESDDSDDSDDAPAVKK	1×DSSO [K26]	AAPAKAPAKK	1×DSSO [K5]	117.56	117.56	8	TRUE	A0A2K3DNK6	A0A2K3DNK6	NA	ribonucleoprotein complex [GO:1990904]	RNA binding [GO:0003723]	NA	ribonucleoprotein complex [GO:1990904]	RNA binding [GO:0003723]	20210409_ALS_XL_F63.raw	10248
Intra	Cre06.g275100.t1.2	Cre06.g275100.t1.2	Nucleolin	Nucleolin	24	55	KKPEPESDSDEESDDSDDSDDAPAVKK	1×DSSO [K1]	AAPAKAPAKK	1×DSSO [K5]	117.56	117.56	1	TRUE	A0A2K3DNK6	A0A2K3DNK6	NA	ribonucleoprotein complex [GO:1990904]	RNA binding [GO:0003723]	NA	ribonucleoprotein complex [GO:1990904]	RNA binding [GO:0003723]	20210409_ALS_XL_F61.raw	9213
Intra	Cre11.g467770.t1.1	Cre11.g467770.t1.1	Phosphoglycerate kinase, chloroplast precursor	Phosphoglycerate kinase, chloroplast precursor	172	151	AVGAMKNGELLLLENVR	1×Oxidation [M5]; 1×DSSO [K6]	LSELLGKPVTK	1×DSSO [K7]	117.52	82.8	2	TRUE	A8JC04	A8JC04	gluconeogenesis [GO:0006094]; glycolytic process [GO:0006096]	cytosol [GO:0005829]	ADP binding [GO:0043531]; ATP binding [GO:0005524]; phosphoglycerate kinase activity [GO:0004618]	gluconeogenesis [GO:0006094]; glycolytic process [GO:0006096]	cytosol [GO:0005829]	ADP binding [GO:0043531]; ATP binding [GO:0005524]; phosphoglycerate kinase activity [GO:0004618]	20210409_ALS_XL_F50.raw	42484
Intra	Cre17.g719000.t1.2	Cre17.g719000.t1.2	Exon junction complex component, UAP56 DEAD/DEAH box helicase homolog	Exon junction complex component, UAP56 DEAD/DEAH box helicase homolog	211	176	ADCQEIFKLTPHEK	1×Carbamidomethyl [C3]; 1×DSSO [K8]	IKQLAKEGALPLK	1×DSSO [K6]	116.98	116.98	1	TRUE	A8JIJ1	A8JIJ1	NA	NA	ATP binding [GO:0005524]; RNA binding [GO:0003723]; RNA helicase activity [GO:0003724]	NA	NA	ATP binding [GO:0005524]; RNA binding [GO:0003723]; RNA helicase activity [GO:0003724]	20210409_ALS_XL_F60.raw	32666
Intra	Cre02.g081250.t1.2	Cre02.g081250.t1.2	plastid transcriptionally active 16	plastid transcriptionally active 16	582	568	KEAPKVEEEEAPAPK	1×DSSO [K1]	KAAGFFGTGR	1×DSSO [K1]	116.87	116.87	1	TRUE	A0A2K3E0L8	A0A2K3E0L8	NA	NA	NA	NA	NA	NA	20210409_ALS_XL_F58.raw	21373
Intra	Cre10.g451950.t1.2	Cre10.g451950.t1.2	Alanine aminotransferase	Alanine aminotransferase	52	454	EGKVLHPHLLNENVVK	1×DSSO [K3]	ALEAAKAAGK	1×DSSO [K6]	116.87	79.46	2	TRUE	A8HZZ4	A8HZZ4	biosynthetic process [GO:0009058]; photorespiration [GO:0009853]	NA	alanine-glyoxylate transaminase activity [GO:0008453]; glycine:2-oxoglutarate aminotransferase activity [GO:0047958]; L-alanine:2-oxoglutarate aminotransferase activity [GO:0004021]; pyridoxal phosphate binding [GO:0030170]	biosynthetic process [GO:0009058]; photorespiration [GO:0009853]	NA	alanine-glyoxylate transaminase activity [GO:0008453]; glycine:2-oxoglutarate aminotransferase activity [GO:0047958]; L-alanine:2-oxoglutarate aminotransferase activity [GO:0004021]; pyridoxal phosphate binding [GO:0030170]	20210409_ALS_XL_F59.raw	24314
Intra	Cre12.g513200.t1.2	Cre12.g513200.t1.2	Enolase	Enolase	9	27	SVQEYIEKHGLEK	1×Acetyl [S1]; 1×DSSO [K8]	EKPEEPLSFMAK	1×Oxidation [M10]; 1×DSSO [K2]	116.71	64	1	TRUE	A8JH98	A8JH98	glycolytic process [GO:0006096]; regulation of vacuole fusion, non-autophagic [GO:0032889]	axonemal central pair projection [GO:1990718]; phosphopyruvate hydratase complex [GO:0000015]	magnesium ion binding [GO:0000287]; phosphopyruvate hydratase activity [GO:0004634]	glycolytic process [GO:0006096]; regulation of vacuole fusion, non-autophagic [GO:0032889]	axonemal central pair projection [GO:1990718]; phosphopyruvate hydratase complex [GO:0000015]	magnesium ion binding [GO:0000287]; phosphopyruvate hydratase activity [GO:0004634]	20210409_ALS_XL_F49.raw	38610
Intra	Cre02.g079550.t1.2	Cre02.g079550.t1.2	Dynamin-related GTPase, involved in circadian rhythms	Dynamin-related GTPase, involved in circadian rhythms	70	79	AYTSFINESPVASKIK	1×DSSO [K14]	EAFLGEKGLAGK	1×DSSO [K7]	116.48	87.72	1	TRUE	A0A2K3E0G2	A0A2K3E0G2	mitochondrial fission [GO:0000266]	cytoplasm [GO:0005737]; membrane [GO:0016020]	GTPase activity [GO:0003924]; GTP binding [GO:0005525]; microtubule binding [GO:0008017]	mitochondrial fission [GO:0000266]	cytoplasm [GO:0005737]; membrane [GO:0016020]	GTPase activity [GO:0003924]; GTP binding [GO:0005525]; microtubule binding [GO:0008017]	20210409_ALS_XL_F51.raw	40093
Intra	Cre09.g393358.t1.1	Cre09.g393358.t1.1	Hyaluronan / mRNA binding family	Hyaluronan / mRNA binding family	251	261	QSTEEQGLDLAAVEKK	1×DSSO [K15]	AAKEAAAASK	1×DSSO [K3]	116.44	78.43	1	TRUE	A8J087	A8J087	NA	cytoplasm [GO:0005737]; nucleus [GO:0005634]	RNA binding [GO:0003723]	NA	cytoplasm [GO:0005737]; nucleus [GO:0005634]	RNA binding [GO:0003723]	20210409_ALS_XL_F51.raw	23914
Intra	Cre06.g250100.t1.2	Cre06.g250100.t1.2	Heat shock protein 70B	Heat shock protein 70B	167	561	LTEDAAKFLNDKVEK	1×DSSO [K7]	EAEKFAGEDKK	1×DSSO [K10]	127.95	127.95	1	TRUE	A8HYV3	A8HYV3	protein folding [GO:0006457]	chloroplast [GO:0009507]	ATPase activity [GO:0016887]; ATP binding [GO:0005524]; unfolded protein binding [GO:0051082]	protein folding [GO:0006457]	chloroplast [GO:0009507]	ATPase activity [GO:0016887]; ATP binding [GO:0005524]; unfolded protein binding [GO:0051082]	20210409_ALS_XL_F61.raw	25833
Intra	Cre03.g178450.t1.2	Cre03.g178450.t1.2	Chaperonin 10	Chaperonin 10	23	98	VQAVSKTAGGVLLPESVTQK	1×DSSO [K6]	DEELLGVLKD	1×DSSO [K9]	116.35	88.18	1	TRUE	A8IDN1	A8IDN1	chaperone cofactor-dependent protein refolding [GO:0051085]	mitochondrial matrix [GO:0005759]	ATPase activity [GO:0016887]; ATP binding [GO:0005524]; chaperone binding [GO:0051087]; metal ion binding [GO:0046872]; unfolded protein binding [GO:0051082]	chaperone cofactor-dependent protein refolding [GO:0051085]	mitochondrial matrix [GO:0005759]	ATPase activity [GO:0016887]; ATP binding [GO:0005524]; chaperone binding [GO:0051087]; metal ion binding [GO:0046872]; unfolded protein binding [GO:0051082]	20210409_ALS_XL_F31.raw	43470
Inter	Cre14.g630100.t1.2	Cre02.g101350.t1.2	Cytosolic 80S ribosomal protein L12	Cytosolic 80S ribosomal protein L10a	210	3	AKEAAKEEAS	1×DSSO [K2]	SKISNDVLR	1×Acetyl [S1]; 1×DSSO [K2]	116.09	57.45	6	FALSE	A8IUV7	A8I4T2	translation [GO:0006412]	cytosolic large ribosomal subunit [GO:0022625]	RNA binding [GO:0003723]; structural constituent of ribosome [GO:0003735]	maturation of LSU-rRNA [GO:0000470]; translation [GO:0006412]	cytosolic large ribosomal subunit [GO:0022625]	RNA binding [GO:0003723]; structural constituent of ribosome [GO:0003735]	20210409_ALS_XL_F40.raw	19893
Intra	Cre12.g505850.t1.2	Cre12.g505850.t1.2	Chaperonin 23	Chaperonin 23	69	55	GGILLPPSAIKKPTSGEVVQLGDGR	1×DSSO [K12]	VAEEEVKTR	1×DSSO [K7]	116.09	116.09	4	TRUE	A8IJY7	A8IJY7	chaperone cofactor-dependent protein refolding [GO:0051085]	chloroplast [GO:0009507]; mitochondrial matrix [GO:0005759]; plastid [GO:0009536]	ATPase activity [GO:0016887]; ATP binding [GO:0005524]; chaperone binding [GO:0051087]; metal ion binding [GO:0046872]; unfolded protein binding [GO:0051082]	chaperone cofactor-dependent protein refolding [GO:0051085]	chloroplast [GO:0009507]; mitochondrial matrix [GO:0005759]; plastid [GO:0009536]	ATPase activity [GO:0016887]; ATP binding [GO:0005524]; chaperone binding [GO:0051087]; metal ion binding [GO:0046872]; unfolded protein binding [GO:0051082]	20210409_ALS_XL_F55.raw	32284
Intra	Cre12.g498600.t1.2	Cre12.g498600.t1.2	Eukaryotic translation elongation factor 1 alpha	Eukaryotic translation elongation factor 1 alpha	309	374	IKGVGDVLAGR	1×DSSO [K2]	GLDKGNMPR	1×Oxidation [M7]; 1×DSSO [K4]	116.09	65.13	12	FALSE	A0A2K3D3E1	A0A2K3D3E1	translation [GO:0006412]	NA	GTPase activity [GO:0003924]; GTP binding [GO:0005525]	translation [GO:0006412]	NA	GTPase activity [GO:0003924]; GTP binding [GO:0005525]	20210409_ALS_XL_F55.raw	28034
Intra	Cre12.g528700.t1.2	Cre12.g528700.t1.2	Tryptophan synthetase alpha subunit	Tryptophan synthetase alpha subunit	105	139	ALDKHTTLDK	1×DSSO [K4]	KGLDNFAR	1×DSSO [K1]	115.01	74.16	1	TRUE	A0A2K3D4M6	A0A2K3D4M6	tryptophan biosynthetic process [GO:0000162]	chloroplast [GO:0009507]; cytosol [GO:0005829]	tryptophan synthase activity [GO:0004834]	tryptophan biosynthetic process [GO:0000162]	chloroplast [GO:0009507]; cytosol [GO:0005829]	tryptophan synthase activity [GO:0004834]	20210409_ALS_XL_F60.raw	22708
Intra	Cre02.g076250.t1.1	Cre02.g076250.t1.1	Chloroplast elongation factor G	Chloroplast elongation factor G	114	83	ILYYTGKSYK	1×DSSO [K7]	EKTLDRYR	1×DSSO [K2]	115.01	72.18	2	TRUE	A0A2K3E076	A0A2K3E076	chloroplast organization [GO:0009658]; mitochondrial translation [GO:0032543]; ribosome disassembly [GO:0032790]; seed germination [GO:0009845]	apoplast [GO:0048046]; chloroplast envelope [GO:0009941]; chloroplast stroma [GO:0009570]; mitochondrion [GO:0005739]	ATP binding [GO:0005524]; GTPase activity [GO:0003924]; GTP binding [GO:0005525]; mRNA binding [GO:0003729]; translation elongation factor activity [GO:0003746]	chloroplast organization [GO:0009658]; mitochondrial translation [GO:0032543]; ribosome disassembly [GO:0032790]; seed germination [GO:0009845]	apoplast [GO:0048046]; chloroplast envelope [GO:0009941]; chloroplast stroma [GO:0009570]; mitochondrion [GO:0005739]	ATP binding [GO:0005524]; GTPase activity [GO:0003924]; GTP binding [GO:0005525]; mRNA binding [GO:0003729]; translation elongation factor activity [GO:0003746]	20210409_ALS_XL_F61.raw	24753
Intra	Cre01.g011000.t1.2	Cre01.g011000.t1.2	Cytosolic 80S ribosomal protein L6	Cytosolic 80S ribosomal protein L6	47	42	AVAKQAEGKAPR	1×DSSO [K4]	NGGKFPAPAKK	1×DSSO [K10]	114.94	43.23	3	TRUE	A8HP90	A8HP90	cytoplasmic translation [GO:0002181]; ribosomal large subunit assembly [GO:0000027]	cytosolic large ribosomal subunit [GO:0022625]	RNA binding [GO:0003723]; structural constituent of ribosome [GO:0003735]	cytoplasmic translation [GO:0002181]; ribosomal large subunit assembly [GO:0000027]	cytosolic large ribosomal subunit [GO:0022625]	RNA binding [GO:0003723]; structural constituent of ribosome [GO:0003735]	20210409_ALS_XL_F61.raw	11901
Intra	Cre07.g336450.t1.2	Cre07.g336450.t1.2	None	None	61	50	AVIAKSHEIHGQGR	1×DSSO [K5]	APLPKDAEGVK	1×DSSO [K5]	114.94	60.54	2	TRUE	A8JCI0	A8JCI0	NA	NA	NA	NA	NA	NA	20210409_ALS_XL_F61.raw	17469
Intra	Cre08.g358562.t1.1	Cre08.g358562.t1.1	Chaperonin 20	Chaperonin 20	43	31	VLVKVDKEEAK	1×DSSO [K4]	QFKAVKPVGDR	1×DSSO [K3]	114.94	114.94	1	TRUE	A0A2K3DG79	A0A2K3DG79	chaperone cofactor-dependent protein refolding [GO:0051085]	chloroplast [GO:0009507]; mitochondrial matrix [GO:0005759]; plastid [GO:0009536]	ATPase activity [GO:0016887]; ATP binding [GO:0005524]; chaperone binding [GO:0051087]; metal ion binding [GO:0046872]; unfolded protein binding [GO:0051082]	chaperone cofactor-dependent protein refolding [GO:0051085]	chloroplast [GO:0009507]; mitochondrial matrix [GO:0005759]; plastid [GO:0009536]	ATPase activity [GO:0016887]; ATP binding [GO:0005524]; chaperone binding [GO:0051087]; metal ion binding [GO:0046872]; unfolded protein binding [GO:0051082]	20210409_ALS_XL_F61.raw	19588
Intra	Cre08.g372450.t1.2	Cre08.g372450.t1.2	Photosystem II Oxygen Evolution Enhancer protein 3	Photosystem II Oxygen Evolution Enhancer protein 3	146	98	FDLNTLASTKEKEAK	1×DSSO [K10]	ASLDETKKR	1×DSSO [K7]	114.86	114.86	7	TRUE	A8JEV1	A8JEV1	photosynthetic electron transport chain [GO:0009767]	chloroplast [GO:0009507]; extrinsic component of membrane [GO:0019898]; photosystem II oxygen evolving complex [GO:0009654]	calcium ion binding [GO:0005509]; electron transporter, transferring electrons within the cyclic electron transport pathway of photosynthesis activity [GO:0045156]	photosynthetic electron transport chain [GO:0009767]	chloroplast [GO:0009507]; extrinsic component of membrane [GO:0019898]; photosystem II oxygen evolving complex [GO:0009654]	calcium ion binding [GO:0005509]; electron transporter, transferring electrons within the cyclic electron transport pathway of photosynthesis activity [GO:0045156]	20210409_ALS_XL_F58.raw	26433
Intra	Cre08.g378000.t1.2	Cre08.g378000.t1.2	decapping 5-like	decapping 5-like	287	274	EVGEAVKVR	1×DSSO [K7]	FKKEDLAK	1×DSSO [K2]	114.86	114.86	2	TRUE	A0A2K3DHU8	A0A2K3DHU8	P-body assembly [GO:0033962]; stress granule assembly [GO:0034063]	messenger ribonucleoprotein complex [GO:1990124]; P-body [GO:0000932]	mRNA binding [GO:0003729]	P-body assembly [GO:0033962]; stress granule assembly [GO:0034063]	messenger ribonucleoprotein complex [GO:1990124]; P-body [GO:0000932]	mRNA binding [GO:0003729]	20210409_ALS_XL_F60.raw	16803
Inter	Cre06.g306300.t1.2	Cre11.g477733.t1.2	Magnesium chelatase subunit I, isoform 1	None	308	19	STFDENPAAFRKDYEAGQMALTQR	1×Oxidation [M19]; 1×DSSO [K12]	RAEEVKAAEGR	1×DSSO [K6]	114.59	83.97	3	TRUE	A8IMZ5	A0A2K3D8F6	chlorophyll biosynthetic process [GO:0015995]; photosynthesis [GO:0015979]	chloroplast stroma [GO:0009570]	ATP binding [GO:0005524]; magnesium chelatase activity [GO:0016851]	NA	NA	NA	20210409_ALS_XL_F37.raw	21523
Intra	Cre06.g250100.t1.2	Cre06.g250100.t1.2	Heat shock protein 70B	Heat shock protein 70B	287	278	SEGIDLRKDRQALQR	1×DSSO [K8]	IVDFLADDFKK	1×DSSO [K10]	116.44	62.86	3	TRUE	A8HYV3	A8HYV3	protein folding [GO:0006457]	chloroplast [GO:0009507]	ATPase activity [GO:0016887]; ATP binding [GO:0005524]; unfolded protein binding [GO:0051082]	protein folding [GO:0006457]	chloroplast [GO:0009507]	ATPase activity [GO:0016887]; ATP binding [GO:0005524]; unfolded protein binding [GO:0051082]	20210409_ALS_XL_F59.raw	37730
Intra	Cre01.g042750.t1.2	Cre01.g042750.t1.2	Aconitate hydratase	Aconitate hydratase	114	269	VVYGHLDDPENAEMKR	1×Oxidation [M14]; 1×DSSO [K15]	APKVIGVK	1×DSSO [K3]	114.35	69.98	3	TRUE	A0A2K3E7I5	A0A2K3E7I5	tricarboxylic acid cycle [GO:0006099]	cytosol [GO:0005829]; mitochondrion [GO:0005739]	4 iron, 4 sulfur cluster binding [GO:0051539]; aconitate hydratase activity [GO:0003994]; metal ion binding [GO:0046872]	tricarboxylic acid cycle [GO:0006099]	cytosol [GO:0005829]; mitochondrion [GO:0005739]	4 iron, 4 sulfur cluster binding [GO:0051539]; aconitate hydratase activity [GO:0003994]; metal ion binding [GO:0046872]	20210409_ALS_XL_F57.raw	24044
Intra	Cre16.g660150.t1.2	Cre16.g660150.t1.2	Ribosomal protein S10p/S20e family protein	Ribosomal protein S10p/S20e family protein	9	48	AGVEKAGVEAEAPQVHR	1×DSSO [K5]	GAKEKQLK	1×DSSO [K5]	114.35	114.35	2	FALSE	A0A2K3CTK0	A0A2K3CTK0	translation [GO:0006412]	cytosolic small ribosomal subunit [GO:0022627]; small ribosomal subunit [GO:0015935]	structural constituent of ribosome [GO:0003735]	translation [GO:0006412]	cytosolic small ribosomal subunit [GO:0022627]; small ribosomal subunit [GO:0015935]	structural constituent of ribosome [GO:0003735]	20210409_ALS_XL_F61.raw	17325
Intra	Cre08.g372450.t1.2	Cre08.g372450.t1.2	Photosystem II Oxygen Evolution Enhancer protein 3	Photosystem II Oxygen Evolution Enhancer protein 3	146	152	FDLNTLASTKEKEAK	1×DSSO [K10]	KAALGLRK	1×DSSO [K1]	114.35	114.35	9	TRUE	A8JEV1	A8JEV1	photosynthetic electron transport chain [GO:0009767]	chloroplast [GO:0009507]; extrinsic component of membrane [GO:0019898]; photosystem II oxygen evolving complex [GO:0009654]	calcium ion binding [GO:0005509]; electron transporter, transferring electrons within the cyclic electron transport pathway of photosynthesis activity [GO:0045156]	photosynthetic electron transport chain [GO:0009767]	chloroplast [GO:0009507]; extrinsic component of membrane [GO:0019898]; photosystem II oxygen evolving complex [GO:0009654]	calcium ion binding [GO:0005509]; electron transporter, transferring electrons within the cyclic electron transport pathway of photosynthesis activity [GO:0045156]	20210409_ALS_XL_F61.raw	27731
Intra	Cre06.g306850.t1.2	Cre06.g306850.t1.2	DEAD/DEAH box helicase	DEAD/DEAH box helicase	15	25	ADDAPAKPTEEAPKAEAPK	1×Acetyl [A1]; 1×DSSO [K14]	AEPAKEAAAPEPAKETPK	1×DSSO [K5]	114.19	114.19	1	TRUE	A0A2K3DRJ8	A0A2K3DRJ8	poly(A)+ mRNA export from nucleus [GO:0016973]	cytoplasmic stress granule [GO:0010494]; nucleus [GO:0005634]	ATP binding [GO:0005524]; RNA binding [GO:0003723]; RNA helicase activity [GO:0003724]	poly(A)+ mRNA export from nucleus [GO:0016973]	cytoplasmic stress granule [GO:0010494]; nucleus [GO:0005634]	ATP binding [GO:0005524]; RNA binding [GO:0003723]; RNA helicase activity [GO:0003724]	20210409_ALS_XL_F53.raw	17483
Intra	Cre01.g042750.t1.2	Cre01.g042750.t1.2	Aconitate hydratase	Aconitate hydratase	761	783	QGMLPVTFANPADYDKIDPTDTISIVGLK	1×Oxidation [M3]; 1×DSSO [K16]	TFAPGVPLKVVGK	1×DSSO [K9]	114.17	91.66	1	TRUE	A0A2K3E7I5	A0A2K3E7I5	tricarboxylic acid cycle [GO:0006099]	cytosol [GO:0005829]; mitochondrion [GO:0005739]	4 iron, 4 sulfur cluster binding [GO:0051539]; aconitate hydratase activity [GO:0003994]; metal ion binding [GO:0046872]	tricarboxylic acid cycle [GO:0006099]	cytosol [GO:0005829]; mitochondrion [GO:0005739]	4 iron, 4 sulfur cluster binding [GO:0051539]; aconitate hydratase activity [GO:0003994]; metal ion binding [GO:0046872]	20210409_ALS_XL_F40.raw	49296
Intra	Cre01.g013350.t1.2	Cre01.g013350.t1.2	None	None	142	154	SHAQDNLMDIVPLGKSR	1×Oxidation [M8]; 1×DSSO [K15]	SNFNFSLEDKR	1×DSSO [K10]	114.02	69.58	1	TRUE	A8HPE9	A8HPE9	NA	NA	NA	NA	NA	NA	20210409_ALS_XL_F59.raw	38458
Intra	Cre08.g372450.t1.2	Cre08.g372450.t1.2	Photosystem II Oxygen Evolution Enhancer protein 3	Photosystem II Oxygen Evolution Enhancer protein 3	182	188	EKDQASAAKK	1×DSSO [K9]	LEITKAK	1×DSSO [K5]	113.63	32.41	1	TRUE	A8JEV1	A8JEV1	photosynthetic electron transport chain [GO:0009767]	chloroplast [GO:0009507]; extrinsic component of membrane [GO:0019898]; photosystem II oxygen evolving complex [GO:0009654]	calcium ion binding [GO:0005509]; electron transporter, transferring electrons within the cyclic electron transport pathway of photosynthesis activity [GO:0045156]	photosynthetic electron transport chain [GO:0009767]	chloroplast [GO:0009507]; extrinsic component of membrane [GO:0019898]; photosystem II oxygen evolving complex [GO:0009654]	calcium ion binding [GO:0005509]; electron transporter, transferring electrons within the cyclic electron transport pathway of photosynthesis activity [GO:0045156]	20210409_ALS_XL_F59.raw	11056
Intra	Cre10.g456200.t1.2	Cre10.g456200.t1.2	Cytosolic 80S ribosomal protein S24	Cytosolic 80S ribosomal protein S24	101	131	NGLEKKVEK	1×DSSO [K6]	NAGAGKK	1×DSSO [K7]	113.63	83.06	1	TRUE	A8I0I1	A8I0I1	translation [GO:0006412]	ribosome [GO:0005840]	structural constituent of ribosome [GO:0003735]	translation [GO:0006412]	ribosome [GO:0005840]	structural constituent of ribosome [GO:0003735]	20210409_ALS_XL_F61.raw	7791
Inter	Cre04.g231222.t2.1	Cre07.g339150.t1.1	Chaperonin 60A	Chaperonin 60B2	96	564	AIELKDPVENAGAQLIK	1×DSSO [K5]	EKAPAPAAGGGDYDY	1×DSSO [K2]	113.5	91.15	1	FALSE	A0A2K3DUX4	A8ITH8	protein refolding [GO:0042026]	membrane [GO:0016020]	ATPase activity [GO:0016887]; ATP binding [GO:0005524]; scavenger receptor activity [GO:0005044]	protein folding [GO:0006457]; protein refolding [GO:0042026]	NA	ATPase activity [GO:0016887]; ATP binding [GO:0005524]	20210409_ALS_XL_F33.raw	37214
Intra	Cre12.g498600.t1.2	Cre12.g498600.t1.2	Eukaryotic translation elongation factor 1 alpha	Eukaryotic translation elongation factor 1 alpha	358	354	VDKAGPGDNVGMNIK	1×Oxidation [M12]; 1×DSSO [K3]	VFTVEMHHKR	1×Oxidation [M6]; 1×DSSO [K9]	113.5	84.42	3	FALSE	A0A2K3D3E1	A0A2K3D3E1	translation [GO:0006412]	NA	GTPase activity [GO:0003924]; GTP binding [GO:0005525]	translation [GO:0006412]	NA	GTPase activity [GO:0003924]; GTP binding [GO:0005525]	20210409_ALS_XL_F63.raw	17779
Intra	Cre12.g558900.t1.2	Cre12.g558900.t1.2	Regulator of photosynthetic cyclic electron flow	Regulator of photosynthetic cyclic electron flow	101	75	KAEVVESTSGGLDPR	1×DSSO [K1]	AFQDDTPAAPPPKR	1×DSSO [K13]	113.5	53.24	1	TRUE	A8JGW2	A8JGW2	NA	NA	NA	NA	NA	NA	20210409_ALS_XL_F49.raw	23708
Intra	Cre06.g273000.t1.2	Cre06.g273000.t1.2	Protein Kinase C Binding Protein	Protein Kinase C Binding Protein	9	71	SGEEAAAKAAAHLADTEPPTIFDK	1×Acetyl [S1]; 1×DSSO [K8]	LSKASPEHK	1×DSSO [K3]	113.07	56.98	2	TRUE	A8HVN9	A8HVN9	NA	cytoplasm [GO:0005737]	hydrolase activity [GO:0016787]; kinase activity [GO:0016301]	NA	cytoplasm [GO:0005737]	hydrolase activity [GO:0016787]; kinase activity [GO:0016301]	20210409_ALS_XL_F55.raw	37704
Intra	Cre12.g516200.t1.2	Cre12.g516200.t1.2	Ribosomal protein S5/Elongation Factor G/III/V family protein	Ribosomal protein S5/Elongation Factor G/III/V family protein	410	429	VYSGKVATGAKVR	1×DSSO [K11]	KDLYNKSVQR	1×DSSO [K6]	113.07	113.07	7	TRUE	A8JHX9	A8JHX9	translational elongation [GO:0006414]	ribonucleoprotein complex [GO:1990904]	GTPase activity [GO:0003924]; GTP binding [GO:0005525]; ribosome binding [GO:0043022]; translation elongation factor activity [GO:0003746]	translational elongation [GO:0006414]	ribonucleoprotein complex [GO:1990904]	GTPase activity [GO:0003924]; GTP binding [GO:0005525]; ribosome binding [GO:0043022]; translation elongation factor activity [GO:0003746]	20210409_ALS_XL_F58.raw	17913
Intra	Cre12.g498600.t1.2	Cre12.g498600.t1.2	Eukaryotic translation elongation factor 1 alpha	Eukaryotic translation elongation factor 1 alpha	358	374	RVDKAGPGDNVGMNIK	1×Oxidation [M13]; 1×DSSO [K4]	GLDKGNMPR	1×Oxidation [M7]; 1×DSSO [K4]	113.07	69.63	1	FALSE	A0A2K3D3E1	A0A2K3D3E1	translation [GO:0006412]	NA	GTPase activity [GO:0003924]; GTP binding [GO:0005525]	translation [GO:0006412]	NA	GTPase activity [GO:0003924]; GTP binding [GO:0005525]	20210409_ALS_XL_F59.raw	15816
Intra	Cre01.g013550.t1.1	Cre01.g013550.t1.1	None	None	185	178	KTVAQLEEAANLSR	1×DSSO [K1]	DQAESKELIK	1×DSSO [K6]	112.89	66.05	1	TRUE	A0A2K3E5K1	A0A2K3E5K1	cytoplasmic microtubule organization [GO:0031122]; cytoskeleton-dependent intracellular transport [GO:0030705]	cytoplasm [GO:0005737]	dynein light intermediate chain binding [GO:0051959]; microtubule binding [GO:0008017]	cytoplasmic microtubule organization [GO:0031122]; cytoskeleton-dependent intracellular transport [GO:0030705]	cytoplasm [GO:0005737]	dynein light intermediate chain binding [GO:0051959]; microtubule binding [GO:0008017]	20210409_ALS_XL_F54.raw	31892
Intra	Cre12.g484050.t1.2	Cre12.g484050.t1.2	Cytosolic 80S ribosomal protein L36	Cytosolic 80S ribosomal protein L36	54	61	EVIRDVAGLAPYEKR	1×DSSO [K14]	IMELLKVGKDK	1×Oxidation [M2]; 1×DSSO [K6]	112.75	112.75	8	TRUE	A8JHU2	A8JHU2	cytoplasmic translation [GO:0002181]	cytosolic large ribosomal subunit [GO:0022625]	structural constituent of ribosome [GO:0003735]	cytoplasmic translation [GO:0002181]	cytosolic large ribosomal subunit [GO:0022625]	structural constituent of ribosome [GO:0003735]	20210409_ALS_XL_F60.raw	32615
Intra	Cre09.g412100.t1.2	Cre09.g412100.t1.2	Photosystem I reaction center subunit III	Photosystem I reaction center subunit III	92	85	RLKQYEADSAPAVALK	1×DSSO [K3]	ELKTLEK	1×DSSO [K3]	112.7	45.38	2	TRUE	A8J4S1	A8J4S1	photosynthesis [GO:0015979]	chloroplast thylakoid membrane [GO:0009535]; photosystem I reaction center [GO:0009538]	NA	photosynthesis [GO:0015979]	chloroplast thylakoid membrane [GO:0009535]; photosystem I reaction center [GO:0009538]	NA	20210409_ALS_XL_F58.raw	24540
Intra	Cre03.g194350.t1.2	Cre03.g194350.t1.2	proton pump interactor 1	proton pump interactor 1	535	542	KEMEAKR	1×DSSO [K1]	KADEEAK	1×DSSO [K1]	112.7	31.71	1	TRUE	A0A2K3DYI3	A0A2K3DYI3	NA	integral component of membrane [GO:0016021]	NA	NA	integral component of membrane [GO:0016021]	NA	20210409_ALS_XL_F61.raw	4665
Intra	Cre01.g002300.t1.2	Cre01.g002300.t1.2	Cyclophilin	Cyclophilin	31	44	IEMELYADDVPKTAENFR	1×DSSO [K12]	ALCTGEKGVGR	1×Carbamidomethyl [C3]; 1×DSSO [K7]	112.32	60.3	1	TRUE	A8JD64	A8JD64	protein folding [GO:0006457]; protein peptidyl-prolyl isomerization [GO:0000413]	cytoplasm [GO:0005737]	cyclosporin A binding [GO:0016018]; peptidyl-prolyl cis-trans isomerase activity [GO:0003755]	protein folding [GO:0006457]; protein peptidyl-prolyl isomerization [GO:0000413]	cytoplasm [GO:0005737]	cyclosporin A binding [GO:0016018]; peptidyl-prolyl cis-trans isomerase activity [GO:0003755]	20210409_ALS_XL_F53.raw	36735
Intra	Cre11.g467770.t1.1	Cre11.g467770.t1.1	Phosphoglycerate kinase, chloroplast precursor	Phosphoglycerate kinase, chloroplast precursor	313	320	VGSSLVEDDKIELAKK	1×DSSO [K15]	LEEMAKAK	1×Oxidation [M4]; 1×DSSO [K6]	112.2	96.32	3	TRUE	A8JC04	A8JC04	gluconeogenesis [GO:0006094]; glycolytic process [GO:0006096]	cytosol [GO:0005829]	ADP binding [GO:0043531]; ATP binding [GO:0005524]; phosphoglycerate kinase activity [GO:0004618]	gluconeogenesis [GO:0006094]; glycolytic process [GO:0006096]	cytosol [GO:0005829]	ADP binding [GO:0043531]; ATP binding [GO:0005524]; phosphoglycerate kinase activity [GO:0004618]	20210409_ALS_XL_F57.raw	21818
Intra	Cre02.g073550.t1.2	Cre02.g073550.t1.2	Nucleosome assembly protein	Nucleosome assembly protein	264	252	GDKSKPAFVVEK	1×DSSO [K5]	DVTVEEQKRR	1×DSSO [K8]	111.69	60.72	3	TRUE	A2BCY1	A2BCY1	nucleosome assembly [GO:0006334]	chromatin [GO:0000785]; nucleus [GO:0005634]	chromatin binding [GO:0003682]; histone binding [GO:0042393]	nucleosome assembly [GO:0006334]	chromatin [GO:0000785]; nucleus [GO:0005634]	chromatin binding [GO:0003682]; histone binding [GO:0042393]	20210409_ALS_XL_F59.raw	20298
Intra	Cre06.g278255.t1.1	Cre06.g278255.t1.1	None	None	732	720	AGDLESAGAKAAAAAR	1×DSSO [K10]	DVSGELAASKQR	1×DSSO [K10]	111.62	69.64	1	TRUE	A0A2K3DPC8	A0A2K3DPC8	NA	NA	NA	NA	NA	NA	20210409_ALS_XL_F51.raw	27085
Intra	Cre12.g516200.t1.2	Cre12.g516200.t1.2	Ribosomal protein S5/Elongation Factor G/III/V family protein	Ribosomal protein S5/Elongation Factor G/III/V family protein	585	844	ETVTAQSDHTVMSKSPNKHNR	1×DSSO [K18]; 1×Oxidation [M12]	KGLKPEPAPLSEYEDKL	1×DSSO [K16]	111.61	98.73	20	TRUE	A8JHX9	A8JHX9	translational elongation [GO:0006414]	ribonucleoprotein complex [GO:1990904]	GTPase activity [GO:0003924]; GTP binding [GO:0005525]; ribosome binding [GO:0043022]; translation elongation factor activity [GO:0003746]	translational elongation [GO:0006414]	ribonucleoprotein complex [GO:1990904]	GTPase activity [GO:0003924]; GTP binding [GO:0005525]; ribosome binding [GO:0043022]; translation elongation factor activity [GO:0003746]	20210409_ALS_XL_F61.raw	27303
Intra	Cre03.g200250.t1.2	Cre03.g200250.t1.2	Putative isocitrate lyase/malate synthase	Putative isocitrate lyase/malate synthase	208	333	YGLEEAVKR	1×DSSO [K8]	DASDKLHVR	1×DSSO [K5]	111.3	51.5	1	TRUE	A8IXQ5	A8IXQ5	NA	NA	catalytic activity [GO:0003824]	NA	NA	catalytic activity [GO:0003824]	20210409_ALS_XL_F60.raw	25945
Intra	Cre06.g250250.t1.2	Cre06.g250250.t1.2	Vacuolar ATP synthase subunit C	Vacuolar ATP synthase subunit C	143	152	ASEYNNLKSQLNQITR	1×DSSO [K8]	KAQGSLAVR	1×DSSO [K1]	110.92	72.68	1	TRUE	A8HYU2	A8HYU2	NA	vacuolar proton-transporting V-type ATPase, V1 domain [GO:0000221]	proton-transporting ATPase activity, rotational mechanism [GO:0046961]	NA	vacuolar proton-transporting V-type ATPase, V1 domain [GO:0000221]	proton-transporting ATPase activity, rotational mechanism [GO:0046961]	20210409_ALS_XL_F55.raw	32400
Intra	Cre14.g614900.t2.1	Cre14.g614900.t2.1	Glutaminyl-tRNA synthetase	Glutaminyl-tRNA synthetase	636	798	LKDEKDYYGLAPGK	1×DSSO [K2]	TVSLKESKPVSLKK	1×DSSO [K14]	110.81	110.81	1	FALSE	A0A2K3CXJ2	A0A2K3CXJ2	glutaminyl-tRNA aminoacylation [GO:0006425]	cytoplasm [GO:0005737]	ATP binding [GO:0005524]; glutamine-tRNA ligase activity [GO:0004819]	glutaminyl-tRNA aminoacylation [GO:0006425]	cytoplasm [GO:0005737]	ATP binding [GO:0005524]; glutamine-tRNA ligase activity [GO:0004819]	20210409_ALS_XL_F62.raw	26176
Intra	Cre14.g612500.t1.2	Cre14.g612500.t1.2	Prenyltransferase family protein	Prenyltransferase family protein	362	372	ALEASDVADGALKGAAAR	1×DSSO [K13]	HSADKAR	1×DSSO [K5]	110.43	60.12	1	TRUE	A0A2K3CXC6	A0A2K3CXC6	protein farnesylation [GO:0018343]; protein prenylation [GO:0018342]	protein farnesyltransferase complex [GO:0005965]	protein farnesyltransferase activity [GO:0004660]; zinc ion binding [GO:0008270]	protein farnesylation [GO:0018343]; protein prenylation [GO:0018342]	protein farnesyltransferase complex [GO:0005965]	protein farnesyltransferase activity [GO:0004660]; zinc ion binding [GO:0008270]	20210409_ALS_XL_F59.raw	23055
Intra	Cre01.g040000.t1.2	Cre01.g040000.t1.2	Cytosolic 80S ribosomal protein L26	Cytosolic 80S ribosomal protein L26	51	109	AVPIRKDDEVQVTR	1×DSSO [K6]	LKLDKDR	1×DSSO [K2]	110.43	52.93	2	TRUE	A8HMG7	A8HMG7	cytoplasmic translation [GO:0002181]; ribosomal large subunit biogenesis [GO:0042273]	cytosolic large ribosomal subunit [GO:0022625]	RNA binding [GO:0003723]; structural constituent of ribosome [GO:0003735]	cytoplasmic translation [GO:0002181]; ribosomal large subunit biogenesis [GO:0042273]	cytosolic large ribosomal subunit [GO:0022625]	RNA binding [GO:0003723]; structural constituent of ribosome [GO:0003735]	20210409_ALS_XL_F63.raw	19574
Inter	Cre09.g397697.t1.1	Cre12.g537800.t1.2	Ribosomal protein L4	Cytosolic 80S ribosomal protein L7	18	1	AAAIPMVEVHSIETGEKAAQVALPAVFTAPIRPDIVR	1×Acetyl [A1]; 1×Oxidation [M6]; 1×DSSO [K17]	STVVPELLAK	1×DSSO [S1]	110.23	68.86	1	TRUE	A8J0I0	A0A2K3D598	translation [GO:0006412]	cytosolic large ribosomal subunit [GO:0022625]	RNA binding [GO:0003723]; structural constituent of ribosome [GO:0003735]	maturation of LSU-rRNA from tricistronic rRNA transcript (SSU-rRNA, 5.8S rRNA, LSU-rRNA) [GO:0000463]	cytosolic large ribosomal subunit [GO:0022625]	RNA binding [GO:0003723]; structural constituent of ribosome [GO:0003735]	20210409_ALS_XL_F37.raw	52669
Intra	Cre08.g365632.t1.1	Cre08.g365632.t1.1	Phosphoprotein phosphatase 2C-related	Phosphoprotein phosphatase 2C-related	52	47	KINEDRFDVK	1×DSSO [K1]	AHGAYTVKGTVR	1×DSSO [K8]	110.23	53.68	26	TRUE	A0A2K3DGU8	A0A2K3DGU8	NA	NA	phosphatase activity [GO:0016791]	NA	NA	phosphatase activity [GO:0016791]	20210409_ALS_XL_F65.raw	25721
Intra	Cre06.g250100.t1.2	Cre06.g250100.t1.2	Heat shock protein 70B	Heat shock protein 70B	543	172	ITGASTLDKGDVER	1×DSSO [K9]	FLNDKVEK	1×DSSO [K5]	114.35	68.6	1	TRUE	A8HYV3	A8HYV3	protein folding [GO:0006457]	chloroplast [GO:0009507]	ATPase activity [GO:0016887]; ATP binding [GO:0005524]; unfolded protein binding [GO:0051082]	protein folding [GO:0006457]	chloroplast [GO:0009507]	ATPase activity [GO:0016887]; ATP binding [GO:0005524]; unfolded protein binding [GO:0051082]	20210409_ALS_XL_F55.raw	23796
Intra	Cre17.g734500.t1.2	Cre17.g734500.t1.2	Vacuolar ATP synthase subunit E	Vacuolar ATP synthase subunit E	72	65	KIEYSKQLNEMR	1×Oxidation [M11]; 1×DSSO [K6]	KEGQVEVKK	1×DSSO [K8]	109.88	37.65	4	TRUE	A8IW47	A8IW47	NA	proton-transporting two-sector ATPase complex, catalytic domain [GO:0033178]	proton-exporting ATPase activity, phosphorylative mechanism [GO:0008553]; proton-transporting ATPase activity, rotational mechanism [GO:0046961]	NA	proton-transporting two-sector ATPase complex, catalytic domain [GO:0033178]	proton-exporting ATPase activity, phosphorylative mechanism [GO:0008553]; proton-transporting ATPase activity, rotational mechanism [GO:0046961]	20210409_ALS_XL_F64.raw	16988
Intra	Cre03.g178600.t1.1	Cre03.g178600.t1.1	DNA topoisomerase I	DNA topoisomerase I	12	22	SDSDDDVPLVKR	1×Acetyl [S1]; 1×DSSO [K11]	AAAAPASAKPTPK	1×DSSO [K9]	109.86	47.66	1	TRUE	A0A2K3DXL6	A0A2K3DXL6	chromatin remodeling [GO:0006338]; chromosome segregation [GO:0007059]; DNA replication [GO:0006260]; DNA topological change [GO:0006265]	chromosome [GO:0005694]; nucleolus [GO:0005730]	DNA binding [GO:0003677]; DNA topoisomerase type I (single strand cut, ATP-independent) activity [GO:0003917]	chromatin remodeling [GO:0006338]; chromosome segregation [GO:0007059]; DNA replication [GO:0006260]; DNA topological change [GO:0006265]	chromosome [GO:0005694]; nucleolus [GO:0005730]	DNA binding [GO:0003677]; DNA topoisomerase type I (single strand cut, ATP-independent) activity [GO:0003917]	20210409_ALS_XL_F35.raw	21191
Intra	Cre09.g386400.t1.2	Cre09.g386400.t1.2	Flagellar Associated Protein 124	Flagellar Associated Protein 124	827	816	TKPAGADKTHDDEAVIEGLLGR	1×DSSO [K8]	AGVQIETDPKADR	1×DSSO [K10]	109.86	109.86	1	TRUE	A8J1C1	A8J1C1	cellular response to DNA damage stimulus [GO:0006974]; protein modification by small protein conjugation [GO:0032446]; protein ubiquitination [GO:0016567]; ubiquitin-dependent protein catabolic process [GO:0006511]	cytoplasm [GO:0005737]; nucleus [GO:0005634]	ATP binding [GO:0005524]; ubiquitin activating enzyme activity [GO:0004839]	cellular response to DNA damage stimulus [GO:0006974]; protein modification by small protein conjugation [GO:0032446]; protein ubiquitination [GO:0016567]; ubiquitin-dependent protein catabolic process [GO:0006511]	cytoplasm [GO:0005737]; nucleus [GO:0005634]	ATP binding [GO:0005524]; ubiquitin activating enzyme activity [GO:0004839]	20210409_ALS_XL_F58.raw	37284
Intra	Cre03.g171950.t1.1	Cre03.g171950.t1.1	Phosphoenolpyruvate carboxylase	Phosphoenolpyruvate carboxylase	1024	1047	YFKHATPEAELGNLNIGSRPAR	1×DSSO [K3]	NKDASISTLR	1×DSSO [K2]	109.7	73.06	1	TRUE	A0A2K3DX44	A0A2K3DX44	carbon fixation [GO:0015977]; tricarboxylic acid cycle [GO:0006099]	cytosol [GO:0005829]	phosphoenolpyruvate carboxylase activity [GO:0008964]	carbon fixation [GO:0015977]; tricarboxylic acid cycle [GO:0006099]	cytosol [GO:0005829]	phosphoenolpyruvate carboxylase activity [GO:0008964]	20210409_ALS_XL_F60.raw	31386
Intra	Cre06.g250100.t1.2	Cre06.g250100.t1.2	Heat shock protein 70B	Heat shock protein 70B	146	138	CPNAGKDFAPEEISAQVLR	1×Carbamidomethyl [C1]; 1×DSSO [K6]	VIEDGGNVKIK	1×DSSO [K9]	104.11	67.41	3	TRUE	A8HYV3	A8HYV3	protein folding [GO:0006457]	chloroplast [GO:0009507]	ATPase activity [GO:0016887]; ATP binding [GO:0005524]; unfolded protein binding [GO:0051082]	protein folding [GO:0006457]	chloroplast [GO:0009507]	ATPase activity [GO:0016887]; ATP binding [GO:0005524]; unfolded protein binding [GO:0051082]	20210409_ALS_XL_F51.raw	37440
Intra	Cre06.g250100.t1.2	Cre06.g250100.t1.2	Heat shock protein 70B	Heat shock protein 70B	607	585	LGELKAALPADDAEATK	1×DSSO [K5]	QLKEFEGK	1×DSSO [K3]	98.54	55.61	1	TRUE	A8HYV3	A8HYV3	protein folding [GO:0006457]	chloroplast [GO:0009507]	ATPase activity [GO:0016887]; ATP binding [GO:0005524]; unfolded protein binding [GO:0051082]	protein folding [GO:0006457]	chloroplast [GO:0009507]	ATPase activity [GO:0016887]; ATP binding [GO:0005524]; unfolded protein binding [GO:0051082]	20210409_ALS_XL_F51.raw	30989
Intra	Cre07.g337650.t1.2	Cre07.g337650.t1.2	Mitochondrial pyruvate dehydrogenase complex, E1 component, alpha subunit	Mitochondrial pyruvate dehydrogenase complex, E1 component, alpha subunit	336	340	RLLLNNGVDPADLKK	1×DSSO [K14]	IDKEVKK	1×DSSO [K3]	109.53	109.53	2	TRUE	A0A2K3DKC3	A0A2K3DKC3	acetyl-CoA biosynthetic process from pyruvate [GO:0006086]	mitochondrial pyruvate dehydrogenase complex [GO:0005967]	pyruvate dehydrogenase (acetyl-transferring) activity [GO:0004739]	acetyl-CoA biosynthetic process from pyruvate [GO:0006086]	mitochondrial pyruvate dehydrogenase complex [GO:0005967]	pyruvate dehydrogenase (acetyl-transferring) activity [GO:0004739]	20210409_ALS_XL_F62.raw	26114
Intra	Cre01.g039250.t2.1	Cre01.g039250.t2.1	Cytosolic 80S ribosomal protein S2	Cytosolic 80S ribosomal protein S2	273	72	APFQEFTDFLAKPHIGESK	1×DSSO [K12]	LVQQGKIK	1×DSSO [K6]	109.15	72.69	3	TRUE	A0A2K3E794	A0A2K3E794	translation [GO:0006412]	cytosolic small ribosomal subunit [GO:0022627]	RNA binding [GO:0003723]; structural constituent of ribosome [GO:0003735]	translation [GO:0006412]	cytosolic small ribosomal subunit [GO:0022627]	RNA binding [GO:0003723]; structural constituent of ribosome [GO:0003735]	20210409_ALS_XL_F57.raw	42646
Inter	Cre06.g278500.t1.1	Cre06.g279150.t1.2	tRNA (guanine-N1)-methyltransferase	Aspartyl-tRNA synthetase	92	38	AAKKAEAK	1×DSSO [K4]	AAKEAAK	1×DSSO [K3]	109.15	8.25	1	FALSE	A0A2K3DPJ9	A8J1X8	mitochondrial tRNA processing [GO:0090646]	mitochondrion [GO:0005739]; nucleus [GO:0005634]	tRNA (guanine-N1-)-methyltransferase activity [GO:0009019]; tRNA binding [GO:0000049]	aspartyl-tRNA aminoacylation [GO:0006422]	aminoacyl-tRNA synthetase multienzyme complex [GO:0017101]; cytosol [GO:0005829]	aspartate-tRNA ligase activity [GO:0004815]; ATP binding [GO:0005524]; RNA binding [GO:0003723]	20210409_ALS_XL_F60.raw	3212
Intra	Cre11.g481450.t1.2	Cre11.g481450.t1.2	Chloroplast ATP synthase subunit II	Chloroplast ATP synthase subunit II	150	146	AAKQSELDKTYNEAK	1×DSSO [K3]	SDVSAMINTKK	1×Oxidation [M6]; 1×DSSO [K10]	108.98	108.98	3	TRUE	A8J785	A8J785	ATP synthesis coupled proton transport [GO:0015986]	integral component of membrane [GO:0016021]; proton-transporting ATP synthase complex, coupling factor F(o) [GO:0045263]	proton transmembrane transporter activity [GO:0015078]	ATP synthesis coupled proton transport [GO:0015986]	integral component of membrane [GO:0016021]; proton-transporting ATP synthase complex, coupling factor F(o) [GO:0045263]	proton transmembrane transporter activity [GO:0015078]	20210409_ALS_XL_F57.raw	17183
Intra	Cre06.g275100.t1.2	Cre06.g275100.t1.2	Nucleolin	Nucleolin	131	171	GKPAAAPAAAAKK	1×DSSO [K12]	AAAPAAAKK	1×DSSO [K8]	108.92	41.24	1	TRUE	A0A2K3DNK6	A0A2K3DNK6	NA	ribonucleoprotein complex [GO:1990904]	RNA binding [GO:0003723]	NA	ribonucleoprotein complex [GO:1990904]	RNA binding [GO:0003723]	20210409_ALS_XL_F57.raw	7632
Intra	Cre02.g076400.t1.2	Cre02.g076400.t1.2	Subunit of ESCRT-II complex	Subunit of ESCRT-II complex	163	151	TFKGATPEELGVK	1×DSSO [K3]	ALKLLEAQGK	1×DSSO [K3]	108.76	53.26	1	TRUE	A8IA47	A8IA47	protein transport to vacuole involved in ubiquitin-dependent protein catabolic process via the multivesicular body sorting pathway [GO:0043328]	ESCRT II complex [GO:0000814]	protein homodimerization activity [GO:0042803]; structural molecule activity [GO:0005198]	protein transport to vacuole involved in ubiquitin-dependent protein catabolic process via the multivesicular body sorting pathway [GO:0043328]	ESCRT II complex [GO:0000814]	protein homodimerization activity [GO:0042803]; structural molecule activity [GO:0005198]	20210409_ALS_XL_F53.raw	34182
Intra	Cre12.g498600.t1.2	Cre12.g498600.t1.2	Eukaryotic translation elongation factor 1 alpha	Eukaryotic translation elongation factor 1 alpha	393	502	SDQTLKIVK	1×DSSO [K6]	VVSVTHK	1×DSSO [K7]	108.76	78.66	2	FALSE	A0A2K3D3E1	A0A2K3D3E1	translation [GO:0006412]	NA	GTPase activity [GO:0003924]; GTP binding [GO:0005525]	translation [GO:0006412]	NA	GTPase activity [GO:0003924]; GTP binding [GO:0005525]	20210409_ALS_XL_F55.raw	19305
Intra	Cre03.g194350.t1.2	Cre03.g194350.t1.2	proton pump interactor 1	proton pump interactor 1	549	542	KIQDAAEAAER	1×DSSO [K1]	RKADEEAK	1×DSSO [K2]	108.76	51.66	2	TRUE	A0A2K3DYI3	A0A2K3DYI3	NA	integral component of membrane [GO:0016021]	NA	NA	integral component of membrane [GO:0016021]	NA	20210409_ALS_XL_F56.raw	9961
Intra	Cre13.g564250.t1.2	Cre13.g564250.t1.2	Eukaryotic translation initiation factor 3, subunit A	Eukaryotic translation initiation factor 3, subunit A	579	590	ETLEGEHLKAVAR	1×DSSO [K9]	KKEEAER	1×DSSO [K1]	108.76	108.76	4	FALSE	A0A2K3CZ51	A0A2K3CZ51	formation of cytoplasmic translation initiation complex [GO:0001732]; translation reinitiation [GO:0002188]	eukaryotic 43S preinitiation complex [GO:0016282]; eukaryotic 48S preinitiation complex [GO:0033290]; eukaryotic translation initiation factor 3 complex, eIF3e [GO:0071540]; eukaryotic translation initiation factor 3 complex, eIF3m [GO:0071541]; multi-eIF complex [GO:0043614]	mRNA binding [GO:0003729]; translation initiation factor activity [GO:0003743]	formation of cytoplasmic translation initiation complex [GO:0001732]; translation reinitiation [GO:0002188]	eukaryotic 43S preinitiation complex [GO:0016282]; eukaryotic 48S preinitiation complex [GO:0033290]; eukaryotic translation initiation factor 3 complex, eIF3e [GO:0071540]; eukaryotic translation initiation factor 3 complex, eIF3m [GO:0071541]; multi-eIF complex [GO:0043614]	mRNA binding [GO:0003729]; translation initiation factor activity [GO:0003743]	20210409_ALS_XL_F65.raw	15694
Intra	Cre12.g516200.t1.2	Cre12.g516200.t1.2	Ribosomal protein S5/Elongation Factor G/III/V family protein	Ribosomal protein S5/Elongation Factor G/III/V family protein	471	404	TATITKEGCDDAFPMK	1×Carbamidomethyl [C9]; 1×Oxidation [M15]; 1×DSSO [K6]	VYSGKVATGAK	1×DSSO [K5]	107.75	56.3	1	TRUE	A8JHX9	A8JHX9	translational elongation [GO:0006414]	ribonucleoprotein complex [GO:1990904]	GTPase activity [GO:0003924]; GTP binding [GO:0005525]; ribosome binding [GO:0043022]; translation elongation factor activity [GO:0003746]	translational elongation [GO:0006414]	ribonucleoprotein complex [GO:1990904]	GTPase activity [GO:0003924]; GTP binding [GO:0005525]; ribosome binding [GO:0043022]; translation elongation factor activity [GO:0003746]	20210409_ALS_XL_F51.raw	22136
Intra	Cre02.g095146.t1.1	Cre02.g095146.t1.1	None	None	174	139	AYEAAHPDKTFSK	1×DSSO [K9]	TLSEDVKNKLK	1×DSSO [K9]	107.75	73.83	3	TRUE	A8JEG6	A8JEG6	NA	NA	NA	NA	NA	NA	20210409_ALS_XL_F61.raw	25199
Intra	Cre03.g200991.t1.1	Cre03.g200991.t1.1	CDK inhibitor P21 binding protein	CDK inhibitor P21 binding protein	13	11	KGAEQTEDEAKK	1×DSSO [K1]	KADAALKK	1×DSSO [K7]	107.73	107.73	2	TRUE	A0A2K3DZK3	A0A2K3DZK3	NA	nucleus [GO:0005634]	NA	NA	nucleus [GO:0005634]	NA	20210409_ALS_XL_F63.raw	6129
Intra	gi|41179049|ref|NP_958405.1|	gi|41179049|ref|NP_958405.1|	ribulose-1,5-bisphosphate carboxylase/oxygenase large subunit (chloroplast)	ribulose-1,5-bisphosphate carboxylase/oxygenase large subunit (chloroplast)	489	831	AGAGFKAGVKDYR	1×DSSO [K6]	DDYVEKDR	1×DSSO [K6]	107.73	107.73	1	TRUE	P00877	P00877	NA	NA	NA	NA	NA	NA	20210409_ALS_XL_F60.raw	21047
Intra	Cre09.g405800.t1.2	Cre09.g405800.t1.2	Cystathionine beta-synthase (CBS) family protein	Cystathionine beta-synthase (CBS) family protein	183	190	GNIVKAALAAR	1×DSSO [K5]	KAAAASSN	1×DSSO [K1]	107.49	80.57	1	TRUE	A8J820	A8J820	NA	NA	NA	NA	NA	NA	20210409_ALS_XL_F42.raw	23574
Intra	Cre09.g394450.t1.2	Cre09.g394450.t1.2	Ran-binding protein 1	Ran-binding protein 1	228	240	ADESAGGAAADKEAEELAK	1×DSSO [K12]	EVEGKATTKDE	1×DSSO [K5]	107.49	57.45	1	TRUE	A0A2K3DD98	A0A2K3DD98	intracellular transport [GO:0046907]; positive regulation of GTPase activity [GO:0043547]	cytoplasm [GO:0005737]; nuclear pore [GO:0005643]	NA	intracellular transport [GO:0046907]; positive regulation of GTPase activity [GO:0043547]	cytoplasm [GO:0005737]; nuclear pore [GO:0005643]	NA	20210409_ALS_XL_F49.raw	20498
Intra	Cre02.g091700.t1.2	Cre02.g091700.t1.2	Protofilament ribbon protein of flagellar microtubules	Protofilament ribbon protein of flagellar microtubules	603	569	SGSGALTGDDLEAGLQSAGLKFTR	1×DSSO [K21]	AQVSGKEDAVR	1×DSSO [K6]	107.22	60.02	1	TRUE	Q8LKK4	Q8LKK4	cilium-dependent cell motility [GO:0060285]; mitotic cytokinesis [GO:0000281]; mitotic spindle organization [GO:0007052]	axoneme [GO:0005930]; mitotic spindle [GO:0072686]; motile cilium [GO:0031514]	alpha-tubulin binding [GO:0043014]; calcium ion binding [GO:0005509]	cilium-dependent cell motility [GO:0060285]; mitotic cytokinesis [GO:0000281]; mitotic spindle organization [GO:0007052]	axoneme [GO:0005930]; mitotic spindle [GO:0072686]; motile cilium [GO:0031514]	alpha-tubulin binding [GO:0043014]; calcium ion binding [GO:0005509]	20210409_ALS_XL_F50.raw	40615
Intra	Cre06.g250100.t1.2	Cre06.g250100.t1.2	Heat shock protein 70B	Heat shock protein 70B	543	551	ITGASTLDKGDVER	1×DSSO [K9]	MVKEAEK	1×Oxidation [M1]; 1×DSSO [K3]	98.52	48.21	5	TRUE	A8HYV3	A8HYV3	protein folding [GO:0006457]	chloroplast [GO:0009507]	ATPase activity [GO:0016887]; ATP binding [GO:0005524]; unfolded protein binding [GO:0051082]	protein folding [GO:0006457]	chloroplast [GO:0009507]	ATPase activity [GO:0016887]; ATP binding [GO:0005524]; unfolded protein binding [GO:0051082]	20210409_ALS_XL_F55.raw	17066
Intra	Cre04.g222700.t1.2	Cre04.g222700.t1.2	Elongation Factor 3 and ABC transporter	Elongation Factor 3 and ABC transporter	808	792	KLQENKVQIGDDPK	1×DSSO [K6]	EAQEKETR	1×DSSO [K5]	107.15	107.15	1	TRUE	A8ISZ1	A8ISZ1	NA	NA	ATPase activity [GO:0016887]; ATP binding [GO:0005524]; translation elongation factor activity [GO:0003746]	NA	NA	ATPase activity [GO:0016887]; ATP binding [GO:0005524]; translation elongation factor activity [GO:0003746]	20210409_ALS_XL_F59.raw	14583
Inter	Cre17.g734500.t1.2	Cre02.g076350.t1.2	Vacuolar ATP synthase subunit E	Vacuolar ATP synthase subunit B	222	20	AKLFGVVAQGQH	1×DSSO [K2]	AHVDAAKR	1×DSSO [K7]	107.15	62.43	1	TRUE	A8IW47	A8IA45	NA	proton-transporting two-sector ATPase complex, catalytic domain [GO:0033178]	proton-exporting ATPase activity, phosphorylative mechanism [GO:0008553]; proton-transporting ATPase activity, rotational mechanism [GO:0046961]	ATP metabolic process [GO:0046034]; proton transmembrane transport [GO:1902600]	proton-transporting V-type ATPase, V1 domain [GO:0033180]	ATP binding [GO:0005524]	20210409_ALS_XL_F59.raw	21743
Intra	Cre06.g250100.t1.2	Cre06.g250100.t1.2	Heat shock protein 70B	Heat shock protein 70B	543	193	ITGASTLDKGDVER	1×DSSO [K9]	QATKDAGK	1×DSSO [K4]	93.76	53.42	1	FALSE	A8HYV3	A8HYV3	protein folding [GO:0006457]	chloroplast [GO:0009507]	ATPase activity [GO:0016887]; ATP binding [GO:0005524]; unfolded protein binding [GO:0051082]	protein folding [GO:0006457]	chloroplast [GO:0009507]	ATPase activity [GO:0016887]; ATP binding [GO:0005524]; unfolded protein binding [GO:0051082]	20210409_ALS_XL_F55.raw	14585
Intra	Cre07.g352550.t1.2	Cre07.g352550.t1.2	Putative rhodanese domain phosphatase	Putative rhodanese domain phosphatase	26	1	VDPSFVADVVKSGDKK	1×DSSO [K11]	GHDSDELVAPELSR	1×DSSO [G1]	106.91	106.91	1	TRUE	A8IUB5	A8IUB5	NA	cytoplasm [GO:0005737]; nucleus [GO:0005634]	protein tyrosine phosphatase activity [GO:0004725]	NA	cytoplasm [GO:0005737]; nucleus [GO:0005634]	protein tyrosine phosphatase activity [GO:0004725]	20210409_ALS_XL_F56.raw	37535
Intra	Cre12.g516200.t1.2	Cre12.g516200.t1.2	Ribosomal protein S5/Elongation Factor G/III/V family protein	Ribosomal protein S5/Elongation Factor G/III/V family protein	620	429	SKILSEEFGWDKEIAK	1×DSSO [K2]	DLYNKSVQR	1×DSSO [K5]	106.91	61.03	1	TRUE	A8JHX9	A8JHX9	translational elongation [GO:0006414]	ribonucleoprotein complex [GO:1990904]	GTPase activity [GO:0003924]; GTP binding [GO:0005525]; ribosome binding [GO:0043022]; translation elongation factor activity [GO:0003746]	translational elongation [GO:0006414]	ribonucleoprotein complex [GO:1990904]	GTPase activity [GO:0003924]; GTP binding [GO:0005525]; ribosome binding [GO:0043022]; translation elongation factor activity [GO:0003746]	20210409_ALS_XL_F58.raw	36660
Intra	Cre10.g419050.t2.1	Cre10.g419050.t2.1	Mitochondrial F1F0 ATP synthase, alpha subunit	Mitochondrial F1F0 ATP synthase, alpha subunit	205	119	KDFDVFTVPAGDDTFGR	1×DSSO [K1]	ELEAKTAVGK	1×DSSO [K5]	106.86	69.89	1	FALSE	A0A2K3D914	A0A2K3D914	ATP synthesis coupled proton transport [GO:0015986]	NA	ATP binding [GO:0005524]	ATP synthesis coupled proton transport [GO:0015986]	NA	ATP binding [GO:0005524]	20210409_ALS_XL_F51.raw	39779
Intra	Cre04.g214502.t1.1	Cre04.g214502.t1.1	UDP-D-glucose/UDP-D-galactose 4-epimerase 5	UDP-D-glucose/UDP-D-galactose 4-epimerase 5	296	291	VEHKLVDR	1×DSSO [K4]	AFENASGKK	1×DSSO [K8]	106.84	47.56	1	TRUE	A8J9S9	A8J9S9	galactose metabolic process [GO:0006012]; rRNA processing [GO:0006364]	cytosol [GO:0005829]	RNA binding [GO:0003723]; UDP-glucose 4-epimerase activity [GO:0003978]	galactose metabolic process [GO:0006012]; rRNA processing [GO:0006364]	cytosol [GO:0005829]	RNA binding [GO:0003723]; UDP-glucose 4-epimerase activity [GO:0003978]	20210409_ALS_XL_F61.raw	13566
Intra	Cre08.g360900.t1.2	Cre08.g360900.t1.2	Cytosolic 80S ribosomal protein S15	Cytosolic 80S ribosomal protein S15	65	9	KLAASGEKPEPVR	1×DSSO [K1]	ADAAGDKKR	1×Acetyl [A1]; 1×DSSO [K8]	106.84	106.84	1	TRUE	A8J493	A8J493	ribosomal small subunit assembly [GO:0000028]; translation [GO:0006412]	cytosolic small ribosomal subunit [GO:0022627]	RNA binding [GO:0003723]; structural constituent of ribosome [GO:0003735]	ribosomal small subunit assembly [GO:0000028]; translation [GO:0006412]	cytosolic small ribosomal subunit [GO:0022627]	RNA binding [GO:0003723]; structural constituent of ribosome [GO:0003735]	20210409_ALS_XL_F58.raw	11537
Intra	Cre06.g261650.t1.1	Cre06.g261650.t1.1	Prefoldin molecular chaperone, subunit 3	Prefoldin molecular chaperone, subunit 3	64	71	MIVEDLVQKR	1×Oxidation [M1]; 1×DSSO [K9]	TLQKLPELQR	1×DSSO [K4]	106.76	62.04	5	TRUE	A8HXD3	A8HXD3	microtubule-based process [GO:0007017]; protein folding [GO:0006457]; tubulin complex assembly [GO:0007021]	cytoplasm [GO:0005737]; polysome [GO:0005844]; prefoldin complex [GO:0016272]	tubulin binding [GO:0015631]	microtubule-based process [GO:0007017]; protein folding [GO:0006457]; tubulin complex assembly [GO:0007021]	cytoplasm [GO:0005737]; polysome [GO:0005844]; prefoldin complex [GO:0016272]	tubulin binding [GO:0015631]	20210409_ALS_XL_F54.raw	37015
Intra	Cre06.g251600.t1.2	Cre06.g251600.t1.2	Eukaryotic translation initiation factor 5	Eukaryotic translation initiation factor 5	286	279	KAAEEEAAR	1×DSSO [K1]	KKAEEEK	1×DSSO [K1]	106.75	106.75	1	FALSE	D5LAU2	D5LAU2	formation of cytoplasmic translation initiation complex [GO:0001732]; formation of translation preinitiation complex [GO:0001731]	cytosol [GO:0005829]	eukaryotic initiation factor eIF2 binding [GO:0071074]; GDP-dissociation inhibitor activity [GO:0005092]; GTP binding [GO:0005525]; translation initiation factor activity [GO:0003743]	formation of cytoplasmic translation initiation complex [GO:0001732]; formation of translation preinitiation complex [GO:0001731]	cytosol [GO:0005829]	eukaryotic initiation factor eIF2 binding [GO:0071074]; GDP-dissociation inhibitor activity [GO:0005092]; GTP binding [GO:0005525]; translation initiation factor activity [GO:0003743]	20210409_ALS_XL_F61.raw	4147
Intra	Cre17.g698000.t1.2	Cre17.g698000.t1.2	Mitochondrial F1F0 ATP synthase, beta subunit	Mitochondrial F1F0 ATP synthase, beta subunit	517	510	AKSSEALKDVPSLEK	1×DSSO [K2]	KDESKK	1×DSSO [K1]	106.33	39.77	4	TRUE	A8IQU3	A8IQU3	mitochondrial ATP synthesis coupled proton transport [GO:0042776]	mitochondrial proton-transporting ATP synthase complex [GO:0005753]; proton-transporting ATP synthase complex, catalytic core F(1) [GO:0045261]	ATP binding [GO:0005524]; hydrolase activity [GO:0016787]; proton-transporting ATPase activity, rotational mechanism [GO:0046961]; proton-transporting ATP synthase activity, rotational mechanism [GO:0046933]	mitochondrial ATP synthesis coupled proton transport [GO:0042776]	mitochondrial proton-transporting ATP synthase complex [GO:0005753]; proton-transporting ATP synthase complex, catalytic core F(1) [GO:0045261]	ATP binding [GO:0005524]; hydrolase activity [GO:0016787]; proton-transporting ATPase activity, rotational mechanism [GO:0046961]; proton-transporting ATP synthase activity, rotational mechanism [GO:0046933]	20210409_ALS_XL_F62.raw	18177
Intra	Cre11.g467770.t1.1	Cre11.g467770.t1.1	Phosphoglycerate kinase, chloroplast precursor	Phosphoglycerate kinase, chloroplast precursor	110	151	AAVPTLKYLLDNGAK	1×DSSO [K7]	LSELLGKPVTK	1×DSSO [K7]	105.57	74.15	2	TRUE	A8JC04	A8JC04	gluconeogenesis [GO:0006094]; glycolytic process [GO:0006096]	cytosol [GO:0005829]	ADP binding [GO:0043531]; ATP binding [GO:0005524]; phosphoglycerate kinase activity [GO:0004618]	gluconeogenesis [GO:0006094]; glycolytic process [GO:0006096]	cytosol [GO:0005829]	ADP binding [GO:0043531]; ATP binding [GO:0005524]; phosphoglycerate kinase activity [GO:0004618]	20210409_ALS_XL_F49.raw	45136
Intra	Cre09.g388200.t1.1	Cre09.g388200.t1.1	Cytosolic 80S ribosomal protein L10	Cytosolic 80S ribosomal protein L10	82	74	NAGKEAFHLR	1×DSSO [K4]	VAANKYMVK	1×Oxidation [M7]; 1×DSSO [K5]	105.48	64.63	2	TRUE	A8IZK3	A8IZK3	ribosomal large subunit assembly [GO:0000027]; translation [GO:0006412]	cytosolic large ribosomal subunit [GO:0022625]	structural constituent of ribosome [GO:0003735]	ribosomal large subunit assembly [GO:0000027]; translation [GO:0006412]	cytosolic large ribosomal subunit [GO:0022625]	structural constituent of ribosome [GO:0003735]	20210409_ALS_XL_F60.raw	21730
Intra	Cre12.g529651.t1.1	Cre12.g529651.t1.1	Cytosolic 80S ribosomal protein L7a	Cytosolic 80S ribosomal protein L7a	137	59	TATALALTAVKNEDQREFAK	1×DSSO [K11]	EAGKEAEKK	1×DSSO [K8]	105.48	44.36	1	TRUE	A0A2K3D4Q4	A0A2K3D4Q4	maturation of LSU-rRNA [GO:0000470]	cytosolic large ribosomal subunit [GO:0022625]	RNA binding [GO:0003723]	maturation of LSU-rRNA [GO:0000470]	cytosolic large ribosomal subunit [GO:0022625]	RNA binding [GO:0003723]	20210409_ALS_XL_F60.raw	27020
Intra	Cre06.g292000.t1.1	Cre06.g292000.t1.1	ENTH/VHS/GAT family protein	ENTH/VHS/GAT family protein	8	14	SLFSNLKEK	1×Acetyl [S1]; 1×DSSO [K7]	LSAKLDEFK	1×DSSO [K4]	105.42	71.19	2	TRUE	A0A2K3DQG7	A0A2K3DQG7	intracellular protein transport [GO:0006886]	NA	NA	intracellular protein transport [GO:0006886]	NA	NA	20210409_ALS_XL_F39.raw	37697
Intra	Cre02.g080700.t1.2	Cre02.g080700.t1.2	Endoplasmic reticulum associated Hsp70 protein	Endoplasmic reticulum associated Hsp70 protein	336	370	FEELNMDLFKK	1×Oxidation [M6]; 1×DSSO [K10]	IPKVQDLLR	1×DSSO [K3]	105.42	81.7	1	FALSE	A8I7T8	A8I7T8	cellular response to unfolded protein [GO:0034620]; chaperone cofactor-dependent protein refolding [GO:0051085]; endoplasmic reticulum unfolded protein response [GO:0030968]; protein refolding [GO:0042026]; ubiquitin-dependent ERAD pathway [GO:0030433]	cytoplasm [GO:0005737]; endoplasmic reticulum chaperone complex [GO:0034663]; endoplasmic reticulum lumen [GO:0005788]; membrane [GO:0016020]; nucleus [GO:0005634]	ATPase activity [GO:0016887]; ATP binding [GO:0005524]; heat shock protein binding [GO:0031072]; misfolded protein binding [GO:0051787]; protein folding chaperone [GO:0044183]; unfolded protein binding [GO:0051082]	cellular response to unfolded protein [GO:0034620]; chaperone cofactor-dependent protein refolding [GO:0051085]; endoplasmic reticulum unfolded protein response [GO:0030968]; protein refolding [GO:0042026]; ubiquitin-dependent ERAD pathway [GO:0030433]	cytoplasm [GO:0005737]; endoplasmic reticulum chaperone complex [GO:0034663]; endoplasmic reticulum lumen [GO:0005788]; membrane [GO:0016020]; nucleus [GO:0005634]	ATPase activity [GO:0016887]; ATP binding [GO:0005524]; heat shock protein binding [GO:0031072]; misfolded protein binding [GO:0051787]; protein folding chaperone [GO:0044183]; unfolded protein binding [GO:0051082]	20210409_ALS_XL_F54.raw	42742
Intra	Cre01.g033550.t1.2	Cre01.g033550.t1.2	Protein disulfide isomerase	Protein disulfide isomerase	144	83	TASAFLDFLKEK	1×DSSO [K10]	LGELVAADPKLK	1×DSSO [K10]	105.39	73.04	2	TRUE	A8HQT1	A8HQT1	NA	endoplasmic reticulum [GO:0005783]	protein disulfide isomerase activity [GO:0003756]	NA	endoplasmic reticulum [GO:0005783]	protein disulfide isomerase activity [GO:0003756]	20210409_ALS_XL_F51.raw	46512
Intra	Cre06.g265100.t1.1	Cre06.g265100.t1.1	ABC transporter family protein	ABC transporter family protein	677	681	KLGYYEQEEYKK	1×DSSO [K11]	LTKEIDDLSAKR	1×DSSO [K3]	105.39	66.43	1	TRUE	A0A2K3DMY4	A0A2K3DMY4	NA	NA	ATPase activity [GO:0016887]; ATP binding [GO:0005524]; DNA binding [GO:0003677]	NA	NA	ATPase activity [GO:0016887]; ATP binding [GO:0005524]; DNA binding [GO:0003677]	20210409_ALS_XL_F63.raw	24200
Intra	Cre09.g396213.t1.1	Cre09.g396213.t1.1	Photosystem II Oxygen Evolution Enhancer protein 1	Photosystem II Oxygen Evolution Enhancer protein 1	206	231	GSSFLDPKGRGGSTGYDNAVALPAR	1×DSSO [K8]	ADAEELLKENVKITK	1×DSSO [K8]	105.2	59.37	6	TRUE	A8J0E4	A8J0E4	photosystem II assembly [GO:0010207]; photosystem II stabilization [GO:0042549]	photosystem II oxygen evolving complex [GO:0009654]	oxygen evolving activity [GO:0010242]	photosystem II assembly [GO:0010207]; photosystem II stabilization [GO:0042549]	photosystem II oxygen evolving complex [GO:0009654]	oxygen evolving activity [GO:0010242]	20210409_ALS_XL_F56.raw	36927
Intra	Cre09.g393358.t1.1	Cre09.g393358.t1.1	Hyaluronan / mRNA binding family	Hyaluronan / mRNA binding family	229	215	NVDPNAELKGLK	1×DSSO [K9]	ALNKSAEAK	1×DSSO [K4]	105.12	71.09	1	TRUE	A8J087	A8J087	NA	cytoplasm [GO:0005737]; nucleus [GO:0005634]	RNA binding [GO:0003723]	NA	cytoplasm [GO:0005737]; nucleus [GO:0005634]	RNA binding [GO:0003723]	20210409_ALS_XL_F55.raw	21554
Intra	Cre08.g358562.t1.1	Cre08.g358562.t1.1	Chaperonin 20	Chaperonin 20	64	84	NKPTAGSIIALGDAK	1×DSSO [K2]	LSDKVIYSK	1×DSSO [K4]	104.94	56.07	1	TRUE	A0A2K3DG79	A0A2K3DG79	chaperone cofactor-dependent protein refolding [GO:0051085]	chloroplast [GO:0009507]; mitochondrial matrix [GO:0005759]; plastid [GO:0009536]	ATPase activity [GO:0016887]; ATP binding [GO:0005524]; chaperone binding [GO:0051087]; metal ion binding [GO:0046872]; unfolded protein binding [GO:0051082]	chaperone cofactor-dependent protein refolding [GO:0051085]	chloroplast [GO:0009507]; mitochondrial matrix [GO:0005759]; plastid [GO:0009536]	ATPase activity [GO:0016887]; ATP binding [GO:0005524]; chaperone binding [GO:0051087]; metal ion binding [GO:0046872]; unfolded protein binding [GO:0051082]	20210409_ALS_XL_F53.raw	32932
Intra	Cre08.g360900.t1.2	Cre08.g360900.t1.2	Cytosolic 80S ribosomal protein S15	Cytosolic 80S ribosomal protein S15	65	8	KLAASGEKPEPVR	1×DSSO [K1]	ADAAGDKKR	1×Acetyl [A1]; 1×DSSO [K7]	104.94	104.94	2	TRUE	A8J493	A8J493	ribosomal small subunit assembly [GO:0000028]; translation [GO:0006412]	cytosolic small ribosomal subunit [GO:0022627]	RNA binding [GO:0003723]; structural constituent of ribosome [GO:0003735]	ribosomal small subunit assembly [GO:0000028]; translation [GO:0006412]	cytosolic small ribosomal subunit [GO:0022627]	RNA binding [GO:0003723]; structural constituent of ribosome [GO:0003735]	20210409_ALS_XL_F58.raw	11687
Intra	Cre05.g246800.t1.2	Cre05.g246800.t1.2	Tetrapyrrole-binding protein, chloroplast precursor	Tetrapyrrole-binding protein, chloroplast precursor	238	248	GTQLFQAIMEHPAFEKSSTAK	1×Oxidation [M9]; 1×DSSO [K16]	TLDQKAAEAAGR	1×DSSO [K5]	104.8	64.84	1	TRUE	A8I5N5	A8I5N5	chloroplast-nucleus signaling pathway [GO:0010019]	chloroplast [GO:0009507]	enzyme binding [GO:0019899]; tetrapyrrole binding [GO:0046906]	chloroplast-nucleus signaling pathway [GO:0010019]	chloroplast [GO:0009507]	enzyme binding [GO:0019899]; tetrapyrrole binding [GO:0046906]	20210409_ALS_XL_F56.raw	33170
Intra	gi|41179049|ref|NP_958405.1|	gi|41179049|ref|NP_958405.1|	ribulose-1,5-bisphosphate carboxylase/oxygenase large subunit (chloroplast)	ribulose-1,5-bisphosphate carboxylase/oxygenase large subunit (chloroplast)	809	493	MSGGDHLHSGTVVGKLEGER	1×Oxidation [M1]; 1×DSSO [K15]	AGVKDYR	1×DSSO [K4]	104.64	48.17	2	TRUE	P00877	P00877	NA	NA	NA	NA	NA	NA	20210409_ALS_XL_F63.raw	23658
Intra	Cre01.g006950.t2.1	Cre01.g006950.t2.1	Fructose-1,6-bisphosphate aldolase	Fructose-1,6-bisphosphate aldolase	67	391	GKGILASDESNATTGKR	1×DSSO [K16]	TGGAGK	1×DSSO [K6]	104.48	81.1	3	TRUE	A8JCY4	A8JCY4	fructose 1,6-bisphosphate metabolic process [GO:0030388]; glycolytic process [GO:0006096]	cytosol [GO:0005829]	fructose-bisphosphate aldolase activity [GO:0004332]	fructose 1,6-bisphosphate metabolic process [GO:0030388]; glycolytic process [GO:0006096]	cytosol [GO:0005829]	fructose-bisphosphate aldolase activity [GO:0004332]	20210409_ALS_XL_F56.raw	13077
Intra	Cre07.g331550.t1.2	Cre07.g331550.t1.2	Phosphoserine aminotransferase	Phosphoserine aminotransferase	179	166	SLPAVASWKLSPDSR	1×DSSO [K9]	VNIAAKGDNK	1×DSSO [K6]	104.25	53.71	2	TRUE	A8IH03	A8IH03	L-serine biosynthetic process [GO:0006564]	chloroplast stroma [GO:0009570]; cytoplasm [GO:0005737]	O-phospho-L-serine:2-oxoglutarate aminotransferase activity [GO:0004648]; pyridoxal phosphate binding [GO:0030170]	L-serine biosynthetic process [GO:0006564]	chloroplast stroma [GO:0009570]; cytoplasm [GO:0005737]	O-phospho-L-serine:2-oxoglutarate aminotransferase activity [GO:0004648]; pyridoxal phosphate binding [GO:0030170]	20210409_ALS_XL_F54.raw	32161
Intra	Cre12.g516200.t1.2	Cre12.g516200.t1.2	Ribosomal protein S5/Elongation Factor G/III/V family protein	Ribosomal protein S5/Elongation Factor G/III/V family protein	581	844	ETVTAQSDHTVMSKSPNKHNR	1×Oxidation [M12]; 1×DSSO [K14]	GLKPEPAPLSEYEDKL	1×DSSO [K15]	104.22	91.16	6	TRUE	A8JHX9	A8JHX9	translational elongation [GO:0006414]	ribonucleoprotein complex [GO:1990904]	GTPase activity [GO:0003924]; GTP binding [GO:0005525]; ribosome binding [GO:0043022]; translation elongation factor activity [GO:0003746]	translational elongation [GO:0006414]	ribonucleoprotein complex [GO:1990904]	GTPase activity [GO:0003924]; GTP binding [GO:0005525]; ribosome binding [GO:0043022]; translation elongation factor activity [GO:0003746]	20210409_ALS_XL_F62.raw	28655
Intra	Cre13.g565850.t1.1	Cre13.g565850.t1.1	Alpha subunit of COP-I complex	Alpha subunit of COP-I complex	1217	1201	FTPDCKGQISPLGDFVR	1×Carbamidomethyl [C5]; 1×DSSO [K6]	GSKYAEDPYTGAR	1×DSSO [K3]	104.21	73.47	1	TRUE	A0A2K3CZA0	A0A2K3CZA0	endoplasmic reticulum to Golgi vesicle-mediated transport [GO:0006888]; intracellular protein transport [GO:0006886]; intra-Golgi vesicle-mediated transport [GO:0006891]; retrograde vesicle-mediated transport, Golgi to endoplasmic reticulum [GO:0006890]	COPI vesicle coat [GO:0030126]; Golgi membrane [GO:0000139]	structural molecule activity [GO:0005198]	endoplasmic reticulum to Golgi vesicle-mediated transport [GO:0006888]; intracellular protein transport [GO:0006886]; intra-Golgi vesicle-mediated transport [GO:0006891]; retrograde vesicle-mediated transport, Golgi to endoplasmic reticulum [GO:0006890]	COPI vesicle coat [GO:0030126]; Golgi membrane [GO:0000139]	structural molecule activity [GO:0005198]	20210409_ALS_XL_F53.raw	37663
Intra	Cre06.g250100.t1.2	Cre06.g250100.t1.2	Heat shock protein 70B	Heat shock protein 70B	172	160	FLNDKVEK	1×DSSO [K5]	KLTEDAAK	1×DSSO [K1]	92.28	50.16	1	TRUE	A8HYV3	A8HYV3	protein folding [GO:0006457]	chloroplast [GO:0009507]	ATPase activity [GO:0016887]; ATP binding [GO:0005524]; unfolded protein binding [GO:0051082]	protein folding [GO:0006457]	chloroplast [GO:0009507]	ATPase activity [GO:0016887]; ATP binding [GO:0005524]; unfolded protein binding [GO:0051082]	20210409_ALS_XL_F56.raw	17631
Intra	Cre06.g278500.t1.1	Cre06.g278500.t1.1	tRNA (guanine-N1)-methyltransferase	tRNA (guanine-N1)-methyltransferase	355	344	GAHNTDKGGAADGEQPAVK	1×DSSO [K7]	AGDKGAGR	1×DSSO [K4]	103.79	18.15	1	TRUE	A0A2K3DPJ9	A0A2K3DPJ9	mitochondrial tRNA processing [GO:0090646]	mitochondrion [GO:0005739]; nucleus [GO:0005634]	tRNA (guanine-N1-)-methyltransferase activity [GO:0009019]; tRNA binding [GO:0000049]	mitochondrial tRNA processing [GO:0090646]	mitochondrion [GO:0005739]; nucleus [GO:0005634]	tRNA (guanine-N1-)-methyltransferase activity [GO:0009019]; tRNA binding [GO:0000049]	20210409_ALS_XL_F59.raw	7939
Intra	Cre07.g331550.t1.2	Cre07.g331550.t1.2	Phosphoserine aminotransferase	Phosphoserine aminotransferase	368	357	AGMLQLKGHR	1×Oxidation [M3]; 1×DSSO [K7]	QFIKEAEK	1×DSSO [K4]	103.79	60.72	1	TRUE	A8IH03	A8IH03	L-serine biosynthetic process [GO:0006564]	chloroplast stroma [GO:0009570]; cytoplasm [GO:0005737]	O-phospho-L-serine:2-oxoglutarate aminotransferase activity [GO:0004648]; pyridoxal phosphate binding [GO:0030170]	L-serine biosynthetic process [GO:0006564]	chloroplast stroma [GO:0009570]; cytoplasm [GO:0005737]	O-phospho-L-serine:2-oxoglutarate aminotransferase activity [GO:0004648]; pyridoxal phosphate binding [GO:0030170]	20210409_ALS_XL_F59.raw	19375
Inter	Cre09.g411100.t1.2	Cre04.g214503.t2.1	Cytosolic 80S ribosomal protein S10	Ribosomal protein L7Ae/L30e/S12e/Gadd45 family protein	13	33	EVYKYLFK	1×DSSO [K4]	KALAHDGLCR	1×Carbamidomethyl [C9]; 1×DSSO [K1]	103.79	62.94	1	TRUE	A8J4Q3	A8J9T0	ribosomal small subunit assembly [GO:0000028]	cytosolic small ribosomal subunit [GO:0022627]	RNA binding [GO:0003723]; structural constituent of ribosome [GO:0003735]	translation [GO:0006412]	cytosolic small ribosomal subunit [GO:0022627]	structural constituent of ribosome [GO:0003735]	20210409_ALS_XL_F60.raw	30036
Intra	Cre01.g019250.t1.2	Cre01.g019250.t1.2	GDP-D-mannose 3',5'-epimerase	GDP-D-mannose 3',5'-epimerase	15	334	ATAAVHEDYASVSKLAK	1×Acetyl [A1]; 1×DSSO [K14]	LGWEPTVTLADGLKR	1×DSSO [K14]	103.35	62.24	1	TRUE	A8HPS2	A8HPS2	NA	cytosol [GO:0005829]	GDP-mannose 3,5-epimerase activity [GO:0047918]; NAD binding [GO:0051287]	NA	cytosol [GO:0005829]	GDP-mannose 3,5-epimerase activity [GO:0047918]; NAD binding [GO:0051287]	20210409_ALS_XL_F45.raw	41991
Intra	Cre10.g451950.t1.2	Cre10.g451950.t1.2	Alanine aminotransferase	Alanine aminotransferase	49	454	KDEDLHAKEGK	1×DSSO [K8]	ALEAAKAAGK	1×DSSO [K6]	103.28	58.42	1	TRUE	A8HZZ4	A8HZZ4	biosynthetic process [GO:0009058]; photorespiration [GO:0009853]	NA	alanine-glyoxylate transaminase activity [GO:0008453]; glycine:2-oxoglutarate aminotransferase activity [GO:0047958]; L-alanine:2-oxoglutarate aminotransferase activity [GO:0004021]; pyridoxal phosphate binding [GO:0030170]	biosynthetic process [GO:0009058]; photorespiration [GO:0009853]	NA	alanine-glyoxylate transaminase activity [GO:0008453]; glycine:2-oxoglutarate aminotransferase activity [GO:0047958]; L-alanine:2-oxoglutarate aminotransferase activity [GO:0004021]; pyridoxal phosphate binding [GO:0030170]	20210409_ALS_XL_F64.raw	12283
Inter	Cre12.g514850.t1.2	Cre06.g250100.t1.2	Heat shock protein 90C	Heat shock protein 70B	121	197	ELISNASDALDKAR	1×DSSO [K12]	DAGKIAGLEVLR	1×DSSO [K4]	103.2	51.2	2	FALSE	Q66T67	A8HYV3	protein folding [GO:0006457]	endoplasmic reticulum [GO:0005783]; perinuclear region of cytoplasm [GO:0048471]	ATPase activity [GO:0016887]; ATP binding [GO:0005524]; unfolded protein binding [GO:0051082]	protein folding [GO:0006457]	chloroplast [GO:0009507]	ATPase activity [GO:0016887]; ATP binding [GO:0005524]; unfolded protein binding [GO:0051082]	20210409_ALS_XL_F50.raw	40366
Intra	Cre16.g672300.t1.2	Cre16.g672300.t1.2	High mobility group protein	High mobility group protein	47	53	ATKPAKAEKAPK	1×DSSO [K9]	AEKAPK	1×DSSO [K3]	102.87	102.87	1	TRUE	A8J3F0	A8J3F0	NA	nucleus [GO:0005634]	DNA binding, bending [GO:0008301]	NA	nucleus [GO:0005634]	DNA binding, bending [GO:0008301]	20210409_ALS_XL_F62.raw	4358
Intra	Cre13.g565400.t2.1	Cre13.g565400.t2.1	None	None	141	148	AAAEDKAKSDAR	1×DSSO [K8]	RAKLEEEAIR	1×DSSO [K3]	102.81	102.81	2	FALSE	A0A2K3CZ87	A0A2K3CZ87	NA	NA	NA	NA	NA	NA	20210409_ALS_XL_F65.raw	14153
Intra	Cre06.g306300.t1.2	Cre06.g306300.t1.2	Magnesium chelatase subunit I, isoform 1	Magnesium chelatase subunit I, isoform 1	116	284	IGGVMIMGDRGTGKSTTIR	1×DSSO [K14]; 2×Oxidation [M5; M7]	FGMHAQIGTVKDPR	1×Oxidation [M3]; 1×DSSO [K11]	102.55	47.56	5	TRUE	A8IMZ5	A8IMZ5	chlorophyll biosynthetic process [GO:0015995]; photosynthesis [GO:0015979]	chloroplast stroma [GO:0009570]	ATP binding [GO:0005524]; magnesium chelatase activity [GO:0016851]	chlorophyll biosynthetic process [GO:0015995]; photosynthesis [GO:0015979]	chloroplast stroma [GO:0009570]	ATP binding [GO:0005524]; magnesium chelatase activity [GO:0016851]	20210409_ALS_XL_F59.raw	22944
Intra	Cre02.g080200.t1.2	Cre02.g080200.t1.2	Transketolase	Transketolase	291	291	AVKDKPTLIK	1×DSSO [K5]	DKPTLIK	1×DSSO [K2]	102.29	77.39	1	TRUE	A8IAN1	A8IAN1	pentose-phosphate shunt [GO:0006098]	cytosol [GO:0005829]	metal ion binding [GO:0046872]; transketolase activity [GO:0004802]	pentose-phosphate shunt [GO:0006098]	cytosol [GO:0005829]	metal ion binding [GO:0046872]; transketolase activity [GO:0004802]	20210409_ALS_XL_F58.raw	24853
Intra	Cre06.g275100.t1.2	Cre06.g275100.t1.2	Nucleolin	Nucleolin	24	15	KKPEPESDSDEESDDSDDSDDAPAVKK	1×DSSO [K1]	AKQAATK	1×DSSO [K2]	102.29	102.29	1	TRUE	A0A2K3DNK6	A0A2K3DNK6	NA	ribonucleoprotein complex [GO:1990904]	RNA binding [GO:0003723]	NA	ribonucleoprotein complex [GO:1990904]	RNA binding [GO:0003723]	20210409_ALS_XL_F59.raw	8517
Inter	Cre06.g310700.t1.2	Cre02.g101350.t1.2	Ribosomal protein L36a	Cytosolic 80S ribosomal protein L10a	22	46	HMMMKVTQYK	3×Oxidation [M2; M3; M4]; 1×DSSO [K5]	NYDPQKDKR	1×DSSO [K8]	102.22	102.22	3	TRUE	A8IM74	A8I4T2	translation [GO:0006412]	cytosolic large ribosomal subunit [GO:0022625]	structural constituent of ribosome [GO:0003735]	maturation of LSU-rRNA [GO:0000470]; translation [GO:0006412]	cytosolic large ribosomal subunit [GO:0022625]	RNA binding [GO:0003723]; structural constituent of ribosome [GO:0003735]	20210409_ALS_XL_F67.raw	10908
Inter	Cre06.g259850.t1.2	gi|41179013|ref|NP_958368.1|	Putative chloroplast ribosomal protein L29	ribosomal protein L23 (chloroplast)	85	187	GVGELKPGENQPQPDPEKVPK	1×DSSO [K18]	EGQSINYSLKNDN	1×DSSO [K10]	102.11	102.11	1	TRUE	A8HXM1	Q8HTL3	translation [GO:0006412]	ribosome [GO:0005840]	structural constituent of ribosome [GO:0003735]	NA	NA	NA	20210409_ALS_XL_F49.raw	26589
Intra	Cre12.g538100.t1.2	Cre12.g538100.t1.2	Glutathione S-transferase	Glutathione S-transferase	17	7	TALDETSKTGEFKR	1×DSSO [K8]	AAATGKAR	1×Acetyl [A1]; 1×DSSO [K6]	101.72	101.72	3	TRUE	A8IVD4	A8IVD4	glutathione metabolic process [GO:0006749]	cytoplasm [GO:0005737]	glutathione transferase activity [GO:0004364]	glutathione metabolic process [GO:0006749]	cytoplasm [GO:0005737]	glutathione transferase activity [GO:0004364]	20210409_ALS_XL_F55.raw	17733
Intra	Cre06.g250100.t1.2	Cre06.g250100.t1.2	Heat shock protein 70B	Heat shock protein 70B	301	94	LTEAAEKAK	1×DSSO [K7]	LVGQIAKR	1×DSSO [K7]	80.5	25.97	2	TRUE	A8HYV3	A8HYV3	protein folding [GO:0006457]	chloroplast [GO:0009507]	ATPase activity [GO:0016887]; ATP binding [GO:0005524]; unfolded protein binding [GO:0051082]	protein folding [GO:0006457]	chloroplast [GO:0009507]	ATPase activity [GO:0016887]; ATP binding [GO:0005524]; unfolded protein binding [GO:0051082]	20210409_ALS_XL_F56.raw	15206
Intra	Cre06.g306300.t1.2	Cre06.g306300.t1.2	Magnesium chelatase subunit I, isoform 1	Magnesium chelatase subunit I, isoform 1	168	207	AGEQLPVSSKKIPMVDLPLGATEDR	1×Oxidation [M14]; 1×DSSO [K11]	AFEPGLLAKANR	1×DSSO [K9]	101.69	101.69	3	TRUE	A8IMZ5	A8IMZ5	chlorophyll biosynthetic process [GO:0015995]; photosynthesis [GO:0015979]	chloroplast stroma [GO:0009570]	ATP binding [GO:0005524]; magnesium chelatase activity [GO:0016851]	chlorophyll biosynthetic process [GO:0015995]; photosynthesis [GO:0015979]	chloroplast stroma [GO:0009570]	ATP binding [GO:0005524]; magnesium chelatase activity [GO:0016851]	20210409_ALS_XL_F55.raw	41833
Intra	Cre12.g513200.t1.2	Cre12.g513200.t1.2	Enolase	Enolase	128	49	AVENINAIIAPALKGMDPVKQAEIDQK	1×Oxidation [M16]; 1×DSSO [K20]	ALGQLTPPEIVKVVGR	1×DSSO [K12]	101.64	101.64	1	TRUE	A8JH98	A8JH98	glycolytic process [GO:0006096]; regulation of vacuole fusion, non-autophagic [GO:0032889]	axonemal central pair projection [GO:1990718]; phosphopyruvate hydratase complex [GO:0000015]	magnesium ion binding [GO:0000287]; phosphopyruvate hydratase activity [GO:0004634]	glycolytic process [GO:0006096]; regulation of vacuole fusion, non-autophagic [GO:0032889]	axonemal central pair projection [GO:1990718]; phosphopyruvate hydratase complex [GO:0000015]	magnesium ion binding [GO:0000287]; phosphopyruvate hydratase activity [GO:0004634]	20210409_ALS_XL_F53.raw	47399
Inter	Cre08.g359750.t1.2	Cre06.g308250.t1.2	Cytosolic 80S ribosomal protein S9	Cytosolic 80S ribosomal protein S4	70	254	VLLTLDEKDPKR	1×DSSO [K11]	LTIIQEQKKR	1×DSSO [K9]	101.52	101.52	1	TRUE	A8JGF8	A8IMP6	positive regulation of translational fidelity [GO:0045903]; translation [GO:0006412]	cytosolic small ribosomal subunit [GO:0022627]; small ribosomal subunit [GO:0015935]	rRNA binding [GO:0019843]; structural constituent of ribosome [GO:0003735]	translation [GO:0006412]	cytosolic small ribosomal subunit [GO:0022627]	RNA binding [GO:0003723]; rRNA binding [GO:0019843]; structural constituent of ribosome [GO:0003735]	20210409_ALS_XL_F61.raw	28507
Inter	Cre09.g397697.t1.1	Cre11.g467578.t1.1	Ribosomal protein L4	Ribosomal L28e protein family	18	71	AAAIPMVEVHSIETGEKAAQVALPAVFTAPIRPDIVR	1×Acetyl [A1]; 1×Oxidation [M6]; 1×DSSO [K17]	NASKPSVSK	1×DSSO [K4]	101.23	62.62	14	TRUE	A8J0I0	A0A2K3D7C4	translation [GO:0006412]	cytosolic large ribosomal subunit [GO:0022625]	RNA binding [GO:0003723]; structural constituent of ribosome [GO:0003735]	translation [GO:0006412]	cytosolic large ribosomal subunit [GO:0022625]	structural constituent of ribosome [GO:0003735]	20210409_ALS_XL_F50.raw	50438
Intra	Cre10.g423250.t1.2	Cre10.g423250.t1.2	NAD-dependent malate dehydrogenase	NAD-dependent malate dehydrogenase	347	339	GVEFAAKGPAPAK	1×DSSO [K7]	AELLGSIKK	1×DSSO [K8]	101.23	101.23	1	TRUE	A8ICG9	A8ICG9	carbohydrate metabolic process [GO:0005975]; malate metabolic process [GO:0006108]; tricarboxylic acid cycle [GO:0006099]	chloroplast [GO:0009507]; cytoplasm [GO:0005737]	L-malate dehydrogenase activity [GO:0030060]	carbohydrate metabolic process [GO:0005975]; malate metabolic process [GO:0006108]; tricarboxylic acid cycle [GO:0006099]	chloroplast [GO:0009507]; cytoplasm [GO:0005737]	L-malate dehydrogenase activity [GO:0030060]	20210409_ALS_XL_F53.raw	30392
Intra	Cre06.g275650.t1.2	Cre06.g275650.t1.2	26S proteasome regulatory subunit	26S proteasome regulatory subunit	29	62	MEVDKPEVPKENGAEAVASAAAPATLEDKLK	1×Acetyl [M1]; 1×Oxidation [M1]; 1×DSSO [K29]	KQLTAANVK	1×DSSO [K1]	101.23	46.7	2	TRUE	A8HVA6	A8HVA6	regulation of protein catabolic process [GO:0042176]; ubiquitin-dependent protein catabolic process [GO:0006511]	proteasome regulatory particle, lid subcomplex [GO:0008541]	enzyme regulator activity [GO:0030234]	regulation of protein catabolic process [GO:0042176]; ubiquitin-dependent protein catabolic process [GO:0006511]	proteasome regulatory particle, lid subcomplex [GO:0008541]	enzyme regulator activity [GO:0030234]	20210409_ALS_XL_F53.raw	34475
Inter	Cre11.g477733.t1.2	Cre06.g306300.t1.2	None	Magnesium chelatase subunit I, isoform 1	19	167	RAEEVKAAEGR	1×DSSO [K6]	AGEQLPVSSKK	1×DSSO [K10]	101.21	57.08	2	TRUE	A0A2K3D8F6	A8IMZ5	NA	NA	NA	chlorophyll biosynthetic process [GO:0015995]; photosynthesis [GO:0015979]	chloroplast stroma [GO:0009570]	ATP binding [GO:0005524]; magnesium chelatase activity [GO:0016851]	20210409_ALS_XL_F36.raw	22281
Inter	Cre10.g430400.t1.2	Cre14.g617900.t1.2	Cytosolic 80S ribosomal protein L37	Cytosolic 80S ribosomal protein L35	88	74	NGFREGSEAKPK	1×DSSO [K10]	NKIKEENEK	1×DSSO [K4]	101	14.38	4	TRUE	A8IBG1	A8HNX3	translation [GO:0006412]	cytosolic large ribosomal subunit [GO:0022625]	metal ion binding [GO:0046872]; RNA binding [GO:0003723]; rRNA binding [GO:0019843]; structural constituent of ribosome [GO:0003735]	maturation of LSU-rRNA from tricistronic rRNA transcript (SSU-rRNA, 5.8S rRNA, LSU-rRNA) [GO:0000463]; translation [GO:0006412]	cytosolic large ribosomal subunit [GO:0022625]	mRNA binding [GO:0003729]; structural constituent of ribosome [GO:0003735]	20210409_ALS_XL_F61.raw	10112
Intra	Cre06.g261450.t1.2	Cre06.g261450.t1.2	High mobility group protein	High mobility group protein	123	116	YQKEMESYGGSSGASK	1×Oxidation [M5]; 1×DSSO [K3]	AAKDKER	1×DSSO [K3]	100.91	37.25	3	TRUE	A8HXE1	A8HXE1	NA	nucleus [GO:0005634]	DNA binding, bending [GO:0008301]	NA	nucleus [GO:0005634]	DNA binding, bending [GO:0008301]	20210409_ALS_XL_F59.raw	7497
Intra	Cre06.g251600.t1.2	Cre06.g251600.t1.2	Eukaryotic translation initiation factor 5	Eukaryotic translation initiation factor 5	271	264	KAAEEEAR	1×DSSO [K1]	KAEREAK	1×DSSO [K1]	100.91	37.97	2	TRUE	D5LAU2	D5LAU2	formation of cytoplasmic translation initiation complex [GO:0001732]; formation of translation preinitiation complex [GO:0001731]	cytosol [GO:0005829]	eukaryotic initiation factor eIF2 binding [GO:0071074]; GDP-dissociation inhibitor activity [GO:0005092]; GTP binding [GO:0005525]; translation initiation factor activity [GO:0003743]	formation of cytoplasmic translation initiation complex [GO:0001732]; formation of translation preinitiation complex [GO:0001731]	cytosol [GO:0005829]	eukaryotic initiation factor eIF2 binding [GO:0071074]; GDP-dissociation inhibitor activity [GO:0005092]; GTP binding [GO:0005525]; translation initiation factor activity [GO:0003743]	20210409_ALS_XL_F62.raw	3734
Intra	Cre12.g529950.t1.2	Cre12.g529950.t1.2	Eukaryotic translation initiation factor 4, gamma subunit	Eukaryotic translation initiation factor 4, gamma subunit	265	272	SEKPETLKKLDK	1×DSSO [K8]	VVKELER	1×DSSO [K3]	100.91	100.91	2	TRUE	A0A2K3D4R1	A0A2K3D4R1	NA	eukaryotic translation initiation factor 4F complex [GO:0016281]	mRNA binding [GO:0003729]; translation initiation factor activity [GO:0003743]	NA	eukaryotic translation initiation factor 4F complex [GO:0016281]	mRNA binding [GO:0003729]; translation initiation factor activity [GO:0003743]	20210409_ALS_XL_F63.raw	18393
Intra	Cre14.g617900.t1.2	Cre14.g617900.t1.2	Cytosolic 80S ribosomal protein L35	Cytosolic 80S ribosomal protein L35	25	62	LGSLKGELQQLR	1×DSSO [K5]	VLTVYKQSQR	1×DSSO [K6]	100.82	34.39	2	TRUE	A8HNX3	A8HNX3	maturation of LSU-rRNA from tricistronic rRNA transcript (SSU-rRNA, 5.8S rRNA, LSU-rRNA) [GO:0000463]; translation [GO:0006412]	cytosolic large ribosomal subunit [GO:0022625]	mRNA binding [GO:0003729]; structural constituent of ribosome [GO:0003735]	maturation of LSU-rRNA from tricistronic rRNA transcript (SSU-rRNA, 5.8S rRNA, LSU-rRNA) [GO:0000463]; translation [GO:0006412]	cytosolic large ribosomal subunit [GO:0022625]	mRNA binding [GO:0003729]; structural constituent of ribosome [GO:0003735]	20210409_ALS_XL_F55.raw	33552
Intra	Cre08.g358562.t1.1	Cre08.g358562.t1.1	Chaperonin 20	Chaperonin 20	43	84	VLVKVDKEEAK	1×DSSO [K4]	LSDKVIYSK	1×DSSO [K4]	100.8	82.89	1	TRUE	A0A2K3DG79	A0A2K3DG79	chaperone cofactor-dependent protein refolding [GO:0051085]	chloroplast [GO:0009507]; mitochondrial matrix [GO:0005759]; plastid [GO:0009536]	ATPase activity [GO:0016887]; ATP binding [GO:0005524]; chaperone binding [GO:0051087]; metal ion binding [GO:0046872]; unfolded protein binding [GO:0051082]	chaperone cofactor-dependent protein refolding [GO:0051085]	chloroplast [GO:0009507]; mitochondrial matrix [GO:0005759]; plastid [GO:0009536]	ATPase activity [GO:0016887]; ATP binding [GO:0005524]; chaperone binding [GO:0051087]; metal ion binding [GO:0046872]; unfolded protein binding [GO:0051082]	20210409_ALS_XL_F58.raw	21167
Intra	Cre01.g013350.t1.2	Cre01.g013350.t1.2	None	None	206	182	AAESAVEDKKR	1×DSSO [K9]	KKADDYAAK	1×DSSO [K2]	100.8	100.8	1	TRUE	A8HPE9	A8HPE9	NA	NA	NA	NA	NA	NA	20210409_ALS_XL_F64.raw	9681
Intra	Cre05.g233050.t1.2	Cre05.g233050.t1.2	Flagellar Associated Protein 162	Flagellar Associated Protein 162	5	63	SDVKAAKK	1×Acetyl [S1]; 1×DSSO [K4]	KGGAGGLGK	1×DSSO [K1]	100.36	50.05	6	TRUE	A8JG73	A8JG73	NA	motile cilium [GO:0031514]	NA	NA	motile cilium [GO:0031514]	NA	20210409_ALS_XL_F56.raw	8724
Inter	Cre16.g660150.t1.2	Cre11.g478800.t1.2	Ribosomal protein S10p/S20e family protein	None	4	455	ATKAGVEK	1×Acetyl [A1]; 1×DSSO [K3]	EKQEAAK	1×DSSO [K2]	100.15	27.88	2	TRUE	A0A2K3CTK0	A0A2K3D8I4	translation [GO:0006412]	cytosolic small ribosomal subunit [GO:0022627]; small ribosomal subunit [GO:0015935]	structural constituent of ribosome [GO:0003735]	intracellular mRNA localization [GO:0008298]	endoplasmic reticulum [GO:0005783]; nuclear outer membrane-endoplasmic reticulum membrane network [GO:0042175]; ribonucleoprotein complex [GO:1990904]	NA	20210409_ALS_XL_F41.raw	8091
Intra	Cre06.g308850.t1.2	Cre06.g308850.t1.2	hypothetical eIF3-like protein	hypothetical eIF3-like protein	123	97	ELFGGVSTLKPLESYMPK	1×Oxidation [M16]; 1×DSSO [K10]	INPDDVPLDDPVLEKLR	1×DSSO [K15]	100.09	65.87	1	TRUE	A0A2K3DRI2	A0A2K3DRI2	NA	eukaryotic translation initiation factor 3 complex [GO:0005852]	translation initiation factor activity [GO:0003743]	NA	eukaryotic translation initiation factor 3 complex [GO:0005852]	translation initiation factor activity [GO:0003743]	20210409_ALS_XL_F44.raw	49497
Intra	Cre02.g075700.t1.2	Cre02.g075700.t1.2	Cytosolic 80S ribosomal protein L19	Cytosolic 80S ribosomal protein L19	144	153	VLMEAVHKQKAEK	1×Oxidation [M3]; 1×DSSO [K8]	EKTIADQFEAR	1×DSSO [K2]	100.07	89.48	1	TRUE	A8IA18	A8IA18	translation [GO:0006412]	cytosolic large ribosomal subunit [GO:0022625]	RNA binding [GO:0003723]; structural constituent of ribosome [GO:0003735]	translation [GO:0006412]	cytosolic large ribosomal subunit [GO:0022625]	RNA binding [GO:0003723]; structural constituent of ribosome [GO:0003735]	20210409_ALS_XL_F61.raw	19945
Intra	Cre03.g193800.t1.1	Cre03.g193800.t1.1	Aspartyl-tRNA synthetase	Aspartyl-tRNA synthetase	201	171	AKEELAKLEEGSR	1×DSSO [K2]	AQVAAHGEEVKAAK	1×DSSO [K11]	99.99	66.07	1	TRUE	A0A2K3DYJ4	A0A2K3DYJ4	asparaginyl-tRNA aminoacylation [GO:0006421]	NA	asparagine-tRNA ligase activity [GO:0004816]; ATP binding [GO:0005524]	asparaginyl-tRNA aminoacylation [GO:0006421]	NA	asparagine-tRNA ligase activity [GO:0004816]; ATP binding [GO:0005524]	20210409_ALS_XL_F60.raw	19039
Inter	Cre02.g101350.t1.2	Cre06.g310700.t1.2	Cytosolic 80S ribosomal protein L10a	Ribosomal protein L36a	46	27	NYDPQKDKR	1×DSSO [K8]	VTQYKTGK	1×DSSO [K5]	99.97	74.97	2	FALSE	A8I4T2	A8IM74	maturation of LSU-rRNA [GO:0000470]; translation [GO:0006412]	cytosolic large ribosomal subunit [GO:0022625]	RNA binding [GO:0003723]; structural constituent of ribosome [GO:0003735]	translation [GO:0006412]	cytosolic large ribosomal subunit [GO:0022625]	structural constituent of ribosome [GO:0003735]	20210409_ALS_XL_F61.raw	9913
Intra	Cre03.g185500.t1.1	Cre03.g185500.t1.1	Diphosphoinositol Pentakisphosphate Kinase	Diphosphoinositol Pentakisphosphate Kinase	1546	1554	AVDKEAKEK	1×DSSO [K4]	EAKEKETK	1×DSSO [K3]	99.97	99.97	1	TRUE	A0A2K3DY21	A0A2K3DY21	inositol metabolic process [GO:0006020]; inositol phosphate biosynthetic process [GO:0032958]	cytosol [GO:0005829]	5-diphosphoinositol pentakisphosphate 3-kinase activity [GO:0102092]; ATP binding [GO:0005524]; diphosphoinositol-pentakisphosphate kinase activity [GO:0033857]; inositol-1,3,4,5,6-pentakisphosphate kinase activity [GO:0000827]; inositol heptakisphosphate kinase activity [GO:0000829]; inositol hexakisphosphate 1-kinase activity [GO:0052723]; inositol hexakisphosphate 3-kinase activity [GO:0052724…	inositol metabolic process [GO:0006020]; inositol phosphate biosynthetic process [GO:0032958]	cytosol [GO:0005829]	5-diphosphoinositol pentakisphosphate 3-kinase activity [GO:0102092]; ATP binding [GO:0005524]; diphosphoinositol-pentakisphosphate kinase activity [GO:0033857]; inositol-1,3,4,5,6-pentakisphosphate kinase activity [GO:0000827]; inositol heptakisphosphate kinase activity [GO:0000829]; inositol hexakisphosphate 1-kinase activity [GO:0052723]; inositol hexakisphosphate 3-kinase activity [GO:0052724…	20210409_ALS_XL_F64.raw	4524
Intra	Cre02.g078100.t1.1	Cre02.g078100.t1.1	Eukaryotic initiation factor, eIF-5B	Eukaryotic initiation factor, eIF-5B	937	944	AEEEKAAAAKK	1×DSSO [K10]	KAEEEKAK	1×DSSO [K6]	99.97	5.19	1	TRUE	A0A2K3E0D8	A0A2K3E0D8	NA	NA	GTPase activity [GO:0003924]; GTP binding [GO:0005525]; translation initiation factor activity [GO:0003743]; tRNA binding [GO:0000049]	NA	NA	GTPase activity [GO:0003924]; GTP binding [GO:0005525]; translation initiation factor activity [GO:0003743]; tRNA binding [GO:0000049]	20210409_ALS_XL_F64.raw	5081
Intra	Cre06.g250100.t1.2	Cre06.g250100.t1.2	Heat shock protein 70B	Heat shock protein 70B	172	561	FLNDKVEK	1×DSSO [K5]	FAGEDKKR	1×DSSO [K6]	72.62	72.62	1	TRUE	A8HYV3	A8HYV3	protein folding [GO:0006457]	chloroplast [GO:0009507]	ATPase activity [GO:0016887]; ATP binding [GO:0005524]; unfolded protein binding [GO:0051082]	protein folding [GO:0006457]	chloroplast [GO:0009507]	ATPase activity [GO:0016887]; ATP binding [GO:0005524]; unfolded protein binding [GO:0051082]	20210409_ALS_XL_F62.raw	17611
Intra	Cre07.g336450.t1.2	Cre07.g336450.t1.2	None	None	56	45	DAEGVKAVIAK	1×DSSO [K6]	LPTKAPLPK	1×DSSO [K4]	99.51	64.3	2	TRUE	A8JCI0	A8JCI0	NA	NA	NA	NA	NA	NA	20210409_ALS_XL_F51.raw	29759
Intra	Cre09.g391900.t1.1	Cre09.g391900.t1.1	Thioredoxin h1, cytosolic	Thioredoxin h1, cytosolic	102	109	DGVKADDLVGASQDKLK	1×DSSO [K15]	ALVAKHAAA	1×DSSO [K5]	99.51	70.86	5	TRUE	A8IZR5	A8IZR5	NA	NA	NA	NA	NA	NA	20210409_ALS_XL_F57.raw	25464
Inter	Cre12.g529651.t1.1	Cre13.g568650.t1.2	Cytosolic 80S ribosomal protein L7a	Cytosolic 80S ribosomal protein S3a	185	62	AIAKELAQR	1×DSSO [K4]	IASEALKGR	1×DSSO [K7]	99.51	20.06	1	TRUE	A0A2K3D4Q4	A8HS48	maturation of LSU-rRNA [GO:0000470]	cytosolic large ribosomal subunit [GO:0022625]	RNA binding [GO:0003723]	translation [GO:0006412]	cytosol [GO:0005829]; cytosolic small ribosomal subunit [GO:0022627]	structural constituent of ribosome [GO:0003735]	20210409_ALS_XL_F56.raw	19630
Intra	Cre17.g720250.t1.2	Cre17.g720250.t1.2	Light-harvesting minor chlorophyll a/b binding protein of photosystem II	Light-harvesting minor chlorophyll a/b binding protein of photosystem II	25	30	AGTTATKPAPKATTK	1×DSSO [K11]	KVATSTGTR	1×DSSO [K1]	99.51	99.51	1	TRUE	A8J6D1	A8J6D1	photosynthesis, light harvesting in photosystem I [GO:0009768]; protein-chromophore linkage [GO:0018298]; response to light stimulus [GO:0009416]	chloroplast envelope [GO:0009941]; chloroplast thylakoid membrane [GO:0009535]; photosystem I [GO:0009522]; photosystem II [GO:0009523]; plastoglobule [GO:0010287]	chlorophyll binding [GO:0016168]	photosynthesis, light harvesting in photosystem I [GO:0009768]; protein-chromophore linkage [GO:0018298]; response to light stimulus [GO:0009416]	chloroplast envelope [GO:0009941]; chloroplast thylakoid membrane [GO:0009535]; photosystem I [GO:0009522]; photosystem II [GO:0009523]; plastoglobule [GO:0010287]	chlorophyll binding [GO:0016168]	20210409_ALS_XL_F57.raw	6452
Intra	Cre12.g537800.t1.2	Cre12.g537800.t1.2	Cytosolic 80S ribosomal protein L7	Cytosolic 80S ribosomal protein L7	11	14	STVVPELLAKKR	1×Acetyl [S1]; 1×DSSO [K10]	KRDDEAAAK	1×DSSO [K1]	99.51	91.59	1	TRUE	A0A2K3D598	A0A2K3D598	maturation of LSU-rRNA from tricistronic rRNA transcript (SSU-rRNA, 5.8S rRNA, LSU-rRNA) [GO:0000463]	cytosolic large ribosomal subunit [GO:0022625]	RNA binding [GO:0003723]; structural constituent of ribosome [GO:0003735]	maturation of LSU-rRNA from tricistronic rRNA transcript (SSU-rRNA, 5.8S rRNA, LSU-rRNA) [GO:0000463]	cytosolic large ribosomal subunit [GO:0022625]	RNA binding [GO:0003723]; structural constituent of ribosome [GO:0003735]	20210409_ALS_XL_F58.raw	26958
Intra	Cre12.g514450.t1.2	Cre12.g514450.t1.2	Pre-mRNA splicing factor	Pre-mRNA splicing factor	629	636	REDFSDLVAAKAAQQK	1×DSSO [K11]	KQAAAADNK	1×DSSO [K1]	99.51	57.63	1	TRUE	A0A2K3D3M7	A0A2K3D3M7	mRNA splicing, via spliceosome [GO:0000398]	catalytic step 2 spliceosome [GO:0071013]; precatalytic spliceosome [GO:0071011]; U12-type spliceosomal complex [GO:0005689]; U2 snRNP [GO:0005686]; U2-type spliceosomal complex [GO:0005684]	NA	mRNA splicing, via spliceosome [GO:0000398]	catalytic step 2 spliceosome [GO:0071013]; precatalytic spliceosome [GO:0071011]; U12-type spliceosomal complex [GO:0005689]; U2 snRNP [GO:0005686]; U2-type spliceosomal complex [GO:0005684]	NA	20210409_ALS_XL_F59.raw	25159
Intra	Cre01.g044800.t1.2	Cre01.g044800.t1.2	Pyruvate-formate lyase	Pyruvate-formate lyase	700	690	KKGEPFAPGANPLHGR	1×DSSO [K2]	KTGSTPDGRK	1×DSSO [K1]	99.51	99.51	5	TRUE	A0A2K3E7P1	A0A2K3E7P1	carbohydrate metabolic process [GO:0005975]; threonine catabolic process [GO:0006567]	cytosol [GO:0005829]	formate C-acetyltransferase activity [GO:0008861]	carbohydrate metabolic process [GO:0005975]; threonine catabolic process [GO:0006567]	cytosol [GO:0005829]	formate C-acetyltransferase activity [GO:0008861]	20210409_ALS_XL_F63.raw	17309
Intra	Cre03.g144647.t1.1	Cre03.g144647.t1.1	None	None	136	122	TEEQIRKDLER	1×DSSO [K7]	KKAPVEEPR	1×DSSO [K2]	99.51	99.51	1	TRUE	A0A2K3DV67	A0A2K3DV67	NA	NA	NA	NA	NA	NA	20210409_ALS_XL_F65.raw	17045
Intra	gi|41179049|ref|NP_958405.1|	gi|41179049|ref|NP_958405.1|	ribulose-1,5-bisphosphate carboxylase/oxygenase large subunit (chloroplast)	ribulose-1,5-bisphosphate carboxylase/oxygenase large subunit (chloroplast)	652	493	GLLGCTIKPKLGLSAK	1×Carbamidomethyl [C5]; 1×DSSO [K10]	AGVKDYR	1×DSSO [K4]	99.3	99.3	1	TRUE	P00877	P00877	NA	NA	NA	NA	NA	NA	20210409_ALS_XL_F58.raw	30743
Intra	Cre08.g358562.t1.1	Cre08.g358562.t1.1	Chaperonin 20	Chaperonin 20	77	34	NKPTAGSIIALGDAKSVK	1×DSSO [K15]	AVKPVGDR	1×DSSO [K3]	99.23	51.98	2	TRUE	A0A2K3DG79	A0A2K3DG79	chaperone cofactor-dependent protein refolding [GO:0051085]	chloroplast [GO:0009507]; mitochondrial matrix [GO:0005759]; plastid [GO:0009536]	ATPase activity [GO:0016887]; ATP binding [GO:0005524]; chaperone binding [GO:0051087]; metal ion binding [GO:0046872]; unfolded protein binding [GO:0051082]	chaperone cofactor-dependent protein refolding [GO:0051085]	chloroplast [GO:0009507]; mitochondrial matrix [GO:0005759]; plastid [GO:0009536]	ATPase activity [GO:0016887]; ATP binding [GO:0005524]; chaperone binding [GO:0051087]; metal ion binding [GO:0046872]; unfolded protein binding [GO:0051082]	20210409_ALS_XL_F57.raw	24791
Intra	Cre02.g095146.t1.1	Cre02.g095146.t1.1	None	None	178	185	AYEAAHPDKTFSKLLK	1×DSSO [K13]	LEAKQAYK	1×DSSO [K4]	99.23	99.23	2	TRUE	A8JEG6	A8JEG6	NA	NA	NA	NA	NA	NA	20210409_ALS_XL_F60.raw	26934
Intra	Cre06.g278500.t1.1	Cre06.g278500.t1.1	tRNA (guanine-N1)-methyltransferase	tRNA (guanine-N1)-methyltransferase	338	344	DEQQRKDK	1×DSSO [K6]	AGDKGAGR	1×DSSO [K4]	99.23	22.03	1	TRUE	A0A2K3DPJ9	A0A2K3DPJ9	mitochondrial tRNA processing [GO:0090646]	mitochondrion [GO:0005739]; nucleus [GO:0005634]	tRNA (guanine-N1-)-methyltransferase activity [GO:0009019]; tRNA binding [GO:0000049]	mitochondrial tRNA processing [GO:0090646]	mitochondrion [GO:0005739]; nucleus [GO:0005634]	tRNA (guanine-N1-)-methyltransferase activity [GO:0009019]; tRNA binding [GO:0000049]	20210409_ALS_XL_F62.raw	3491
Inter	Cre09.g397697.t1.1	Cre12.g537800.t1.2	Ribosomal protein L4	Cytosolic 80S ribosomal protein L7	306	154	LINSDEIQSAVRPAKSAGPK	1×DSSO [K15]	IKNNRIPLTDNR	1×DSSO [K2]	99.14	59.89	2	TRUE	A8J0I0	A0A2K3D598	translation [GO:0006412]	cytosolic large ribosomal subunit [GO:0022625]	RNA binding [GO:0003723]; structural constituent of ribosome [GO:0003735]	maturation of LSU-rRNA from tricistronic rRNA transcript (SSU-rRNA, 5.8S rRNA, LSU-rRNA) [GO:0000463]	cytosolic large ribosomal subunit [GO:0022625]	RNA binding [GO:0003723]; structural constituent of ribosome [GO:0003735]	20210409_ALS_XL_F59.raw	27381
Intra	Cre09.g388726.t2.1	Cre09.g388726.t2.1	phosphoesterase	phosphoesterase	245	110	TPEDEFGHADGGKK	1×DSSO [K13]	DDLDWKWYNK	1×DSSO [K6]	98.81	72.21	1	FALSE	A0A2K3DDZ0	A0A2K3DDZ0	DNA repair [GO:0006281]; nucleotide phosphorylation [GO:0046939]	NA	ATP-dependent polydeoxyribonucleotide 5'-hydroxyl-kinase activity [GO:0046404]; double-stranded DNA binding [GO:0003690]; polynucleotide 3'-phosphatase activity [GO:0046403]	DNA repair [GO:0006281]; nucleotide phosphorylation [GO:0046939]	NA	ATP-dependent polydeoxyribonucleotide 5'-hydroxyl-kinase activity [GO:0046404]; double-stranded DNA binding [GO:0003690]; polynucleotide 3'-phosphatase activity [GO:0046403]	20210409_ALS_XL_F59.raw	32737
Intra	Cre16.g677000.t1.2	Cre16.g677000.t1.2	Heat shock protein 70E	Heat shock protein 70E	6	244	ESKRETPAAINFGEK	1×DSSO [K3]	VAVEKVKK	1×DSSO [K5]	82.53	82.53	1	TRUE	A0A2K3CVB0	A0A2K3CVB0	NA	cytosol [GO:0005829]; nucleus [GO:0005634]	ATPase activity [GO:0016887]; ATP binding [GO:0005524]	NA	cytosol [GO:0005829]; nucleus [GO:0005634]	ATPase activity [GO:0016887]; ATP binding [GO:0005524]	20210409_ALS_XL_F61.raw	19878
Intra	Cre02.g119550.t1.2	Cre02.g119550.t1.2	NaCl-inducible protein	NaCl-inducible protein	26	34	AIEDLFFSKEDQR	1×DSSO [K9]	LMSKLLQK	1×Oxidation [M2]; 1×DSSO [K4]	98.54	42.45	1	TRUE	A8JGR1	A8JGR1	NA	NA	NA	NA	NA	NA	20210409_ALS_XL_F54.raw	38667
Intra	Cre03.g156050.t1.2	Cre03.g156050.t1.2	ribosome recycling factor, chloroplast precursor	ribosome recycling factor, chloroplast precursor	253	260	ALEDDIQKLTDTYVKK	1×DSSO [K15]	VEDAAKAK	1×DSSO [K6]	98.54	98.54	1	TRUE	A0A2K3DW10	A0A2K3DW10	translation [GO:0006412]	mitochondrion [GO:0005739]	ribosomal large subunit binding [GO:0043023]	translation [GO:0006412]	mitochondrion [GO:0005739]	ribosomal large subunit binding [GO:0043023]	20210409_ALS_XL_F57.raw	35857
Intra	Cre06.g277050.t1.1	Cre06.g277050.t1.1	ARM repeat superfamily protein	ARM repeat superfamily protein	690	697	VEAKPDSIASLKR	1×DSSO [K12]	KLAEAKEK	1×DSSO [K6]	98.54	55.82	1	TRUE	A0A2K3DNR0	A0A2K3DNR0	actin cytoskeleton organization [GO:0030036]; ribosomal large subunit biogenesis [GO:0042273]; ribosomal large subunit export from nucleus [GO:0000055]	nucleolus [GO:0005730]	NA	actin cytoskeleton organization [GO:0030036]; ribosomal large subunit biogenesis [GO:0042273]; ribosomal large subunit export from nucleus [GO:0000055]	nucleolus [GO:0005730]	NA	20210409_ALS_XL_F62.raw	18599
Intra	Cre01.g038400.t1.2	Cre01.g038400.t1.2	Calreticulin 2, calcium-binding protein	Calreticulin 2, calcium-binding protein	372	364	EEDEKKAK	1×DSSO [K5]	AMFDKVKK	1×Oxidation [M2]; 1×DSSO [K5]	98.54	98.54	1	TRUE	A8HMC0	A8HMC0	endoplasmic reticulum unfolded protein response [GO:0030968]; protein folding [GO:0006457]	endoplasmic reticulum lumen [GO:0005788]; endoplasmic reticulum membrane [GO:0005789]	calcium ion binding [GO:0005509]; unfolded protein binding [GO:0051082]	endoplasmic reticulum unfolded protein response [GO:0030968]; protein folding [GO:0006457]	endoplasmic reticulum lumen [GO:0005788]; endoplasmic reticulum membrane [GO:0005789]	calcium ion binding [GO:0005509]; unfolded protein binding [GO:0051082]	20210409_ALS_XL_F65.raw	8501
Intra	Cre09.g386750.t1.2	Cre09.g386750.t1.2	Heat shock protein 90A	Heat shock protein 90A	442	458	YHSTKSGEETTSLKDYVTR	1×DSSO [K5]	MKEGQK	1×DSSO [K2]; 1×Oxidation [M1]	110.2	110.2	15	FALSE	A8J1U1	A8J1U1	cellular response to heat [GO:0034605]; protein folding [GO:0006457]; protein stabilization [GO:0050821]	cytosol [GO:0005829]; perinuclear region of cytoplasm [GO:0048471]; plasma membrane [GO:0005886]; protein-containing complex [GO:0032991]	ATPase activity [GO:0016887]; ATP binding [GO:0005524]; unfolded protein binding [GO:0051082]	cellular response to heat [GO:0034605]; protein folding [GO:0006457]; protein stabilization [GO:0050821]	cytosol [GO:0005829]; perinuclear region of cytoplasm [GO:0048471]; plasma membrane [GO:0005886]; protein-containing complex [GO:0032991]	ATPase activity [GO:0016887]; ATP binding [GO:0005524]; unfolded protein binding [GO:0051082]	20210409_ALS_XL_F63.raw	17661
Intra	Cre11.g467770.t1.1	Cre11.g467770.t1.1	Phosphoglycerate kinase, chloroplast precursor	Phosphoglycerate kinase, chloroplast precursor	129	190	VLLTSHLGRPKGGPEDKYR	1×DSSO [K11]	FYKEEEKNEPEFAK	1×DSSO [K7]	98.52	98.52	5	TRUE	A8JC04	A8JC04	gluconeogenesis [GO:0006094]; glycolytic process [GO:0006096]	cytosol [GO:0005829]	ADP binding [GO:0043531]; ATP binding [GO:0005524]; phosphoglycerate kinase activity [GO:0004618]	gluconeogenesis [GO:0006094]; glycolytic process [GO:0006096]	cytosol [GO:0005829]	ADP binding [GO:0043531]; ATP binding [GO:0005524]; phosphoglycerate kinase activity [GO:0004618]	20210409_ALS_XL_F67.raw	31240
Intra	Cre11.g468300.t1.2	Cre11.g468300.t1.2	Sar-type small GTPase	Sar-type small GTPase	156	192	GKVNLSDQK	1×DSSO [K2]	WLSQYIK	1×DSSO [K7]	98.51	51.47	1	TRUE	A8JC30	A8JC30	endoplasmic reticulum to Golgi vesicle-mediated transport [GO:0006888]; intracellular protein transport [GO:0006886]; membrane organization [GO:0061024]; positive regulation of protein exit from endoplasmic reticulum [GO:0070863]; regulation of COPII vesicle coating [GO:0003400]; vesicle organization [GO:0016050]	COPII vesicle coat [GO:0030127]; endoplasmic reticulum exit site [GO:0070971]; Golgi apparatus [GO:0005794]	GTPase activity [GO:0003924]; GTP binding [GO:0005525]	endoplasmic reticulum to Golgi vesicle-mediated transport [GO:0006888]; intracellular protein transport [GO:0006886]; membrane organization [GO:0061024]; positive regulation of protein exit from endoplasmic reticulum [GO:0070863]; regulation of COPII vesicle coating [GO:0003400]; vesicle organization [GO:0016050]	COPII vesicle coat [GO:0030127]; endoplasmic reticulum exit site [GO:0070971]; Golgi apparatus [GO:0005794]	GTPase activity [GO:0003924]; GTP binding [GO:0005525]	20210409_ALS_XL_F44.raw	30274
Intra	Cre06.g275100.t1.2	Cre06.g275100.t1.2	Nucleolin	Nucleolin	15	3	AKQAATKLEK	1×DSSO [K2]	GKPVKATGK	1×DSSO [K2]	98.51	98.51	1	TRUE	A0A2K3DNK6	A0A2K3DNK6	NA	ribonucleoprotein complex [GO:1990904]	RNA binding [GO:0003723]	NA	ribonucleoprotein complex [GO:1990904]	RNA binding [GO:0003723]	20210409_ALS_XL_F61.raw	5833
Intra	Cre08.g372450.t1.2	Cre08.g372450.t1.2	Photosystem II Oxygen Evolution Enhancer protein 3	Photosystem II Oxygen Evolution Enhancer protein 3	148	98	FDLNTLASTKEKEAK	1×DSSO [K12]	ASLDETKKR	1×DSSO [K7]	98.51	98.51	1	TRUE	A8JEV1	A8JEV1	photosynthetic electron transport chain [GO:0009767]	chloroplast [GO:0009507]; extrinsic component of membrane [GO:0019898]; photosystem II oxygen evolving complex [GO:0009654]	calcium ion binding [GO:0005509]; electron transporter, transferring electrons within the cyclic electron transport pathway of photosynthesis activity [GO:0045156]	photosynthetic electron transport chain [GO:0009767]	chloroplast [GO:0009507]; extrinsic component of membrane [GO:0019898]; photosystem II oxygen evolving complex [GO:0009654]	calcium ion binding [GO:0005509]; electron transporter, transferring electrons within the cyclic electron transport pathway of photosynthesis activity [GO:0045156]	20210409_ALS_XL_F61.raw	27749
Intra	Cre09.g396213.t1.1	Cre09.g396213.t1.1	Photosystem II Oxygen Evolution Enhancer protein 1	Photosystem II Oxygen Evolution Enhancer protein 1	231	241	ADAEELLKENVK	1×DSSO [K8]	ALKGSAVFSVAK	1×DSSO [K3]	98.5	54.73	1	TRUE	A8J0E4	A8J0E4	photosystem II assembly [GO:0010207]; photosystem II stabilization [GO:0042549]	photosystem II oxygen evolving complex [GO:0009654]	oxygen evolving activity [GO:0010242]	photosystem II assembly [GO:0010207]; photosystem II stabilization [GO:0042549]	photosystem II oxygen evolving complex [GO:0009654]	oxygen evolving activity [GO:0010242]	20210409_ALS_XL_F53.raw	37265
Intra	Cre11.g467770.t1.1	Cre11.g467770.t1.1	Phosphoglycerate kinase, chloroplast precursor	Phosphoglycerate kinase, chloroplast precursor	129	186	VLLTSHLGRPKGGPEDKYR	1×DSSO [K11]	FYKEEEKNEPEFAK	1×DSSO [K3]	98.25	98.25	3	TRUE	A8JC04	A8JC04	gluconeogenesis [GO:0006094]; glycolytic process [GO:0006096]	cytosol [GO:0005829]	ADP binding [GO:0043531]; ATP binding [GO:0005524]; phosphoglycerate kinase activity [GO:0004618]	gluconeogenesis [GO:0006094]; glycolytic process [GO:0006096]	cytosol [GO:0005829]	ADP binding [GO:0043531]; ATP binding [GO:0005524]; phosphoglycerate kinase activity [GO:0004618]	20210409_ALS_XL_F67.raw	32353
Inter	Cre02.g102250.t1.2	Cre12.g498250.t1.2	Cytosolic 80S ribosomal protein S3	Cytosolic 80S ribosomal protein S17	166	19	TPLPDVVKVLEPK	1×DSSO [K8]	VIIEKYYGR	1×DSSO [K5]	97.64	59.99	2	TRUE	A0A2K3E2C7	A8JGK1	translation [GO:0006412]	cytosolic small ribosomal subunit [GO:0022627]; nucleus [GO:0005634]	RNA binding [GO:0003723]; structural constituent of ribosome [GO:0003735]	translation [GO:0006412]	ribosome [GO:0005840]	structural constituent of ribosome [GO:0003735]	20210409_ALS_XL_F53.raw	43133
Intra	Cre12.g502750.t1.2	Cre12.g502750.t1.2	Prefoldin alpha subunit	Prefoldin alpha subunit	13	102	KALQKEVETYR	1×DSSO [K5]	GVESKMLDREK	1×DSSO [K5]	97.64	53.19	3	TRUE	A8IJG5	A8IJG5	chaperone-mediated protein complex assembly [GO:0051131]; protein folding [GO:0006457]	cytoplasm [GO:0005737]; prefoldin complex [GO:0016272]	chaperone binding [GO:0051087]; unfolded protein binding [GO:0051082]	chaperone-mediated protein complex assembly [GO:0051131]; protein folding [GO:0006457]	cytoplasm [GO:0005737]; prefoldin complex [GO:0016272]	chaperone binding [GO:0051087]; unfolded protein binding [GO:0051082]	20210409_ALS_XL_F56.raw	24030
Intra	Cre08.g358562.t1.1	Cre08.g358562.t1.1	Chaperonin 20	Chaperonin 20	77	84	NKPTAGSIIALGDAKSVK	1×DSSO [K15]	LSDKVIYSK	1×DSSO [K4]	97.64	64.45	1	TRUE	A0A2K3DG79	A0A2K3DG79	chaperone cofactor-dependent protein refolding [GO:0051085]	chloroplast [GO:0009507]; mitochondrial matrix [GO:0005759]; plastid [GO:0009536]	ATPase activity [GO:0016887]; ATP binding [GO:0005524]; chaperone binding [GO:0051087]; metal ion binding [GO:0046872]; unfolded protein binding [GO:0051082]	chaperone cofactor-dependent protein refolding [GO:0051085]	chloroplast [GO:0009507]; mitochondrial matrix [GO:0005759]; plastid [GO:0009536]	ATPase activity [GO:0016887]; ATP binding [GO:0005524]; chaperone binding [GO:0051087]; metal ion binding [GO:0046872]; unfolded protein binding [GO:0051082]	20210409_ALS_XL_F57.raw	29701
Intra	Cre13.g568900.t1.2	Cre13.g568900.t1.2	Cytosolic 80S ribosomal protein L17	Cytosolic 80S ribosomal protein L17	160	172	SAGVKAEKDTK	1×DSSO [K5]	KLSKVQLAK	1×DSSO [K4]	97.64	97.64	1	TRUE	A8HS59	A8HS59	cytoplasmic translation [GO:0002181]	cytosolic large ribosomal subunit [GO:0022625]	structural constituent of ribosome [GO:0003735]	cytoplasmic translation [GO:0002181]	cytosolic large ribosomal subunit [GO:0022625]	structural constituent of ribosome [GO:0003735]	20210409_ALS_XL_F63.raw	13174
Intra	Cre12.g516200.t1.2	Cre12.g516200.t1.2	Ribosomal protein S5/Elongation Factor G/III/V family protein	Ribosomal protein S5/Elongation Factor G/III/V family protein	255	232	LWGDNFFDPATKK	1×DSSO [K12]	MYASKFGTDEAR	1×Oxidation [M1]; 1×DSSO [K5]	97.6	58.6	1	TRUE	A8JHX9	A8JHX9	translational elongation [GO:0006414]	ribonucleoprotein complex [GO:1990904]	GTPase activity [GO:0003924]; GTP binding [GO:0005525]; ribosome binding [GO:0043022]; translation elongation factor activity [GO:0003746]	translational elongation [GO:0006414]	ribonucleoprotein complex [GO:1990904]	GTPase activity [GO:0003924]; GTP binding [GO:0005525]; ribosome binding [GO:0043022]; translation elongation factor activity [GO:0003746]	20210409_ALS_XL_F55.raw	39158
Intra	Cre14.g621650.t1.1	Cre14.g621650.t1.1	Malonyl-CoA:acyl-carrier-protein transacylase	Malonyl-CoA:acyl-carrier-protein transacylase	77	70	EMFDKASEILGYDLLK	1×Oxidation [M2]; 1×DSSO [K5]	DLVATVPKAK	1×DSSO [K8]	97.6	76.97	2	TRUE	A0A2K3CY26	A0A2K3CY26	fatty acid biosynthetic process [GO:0006633]	NA	[acyl-carrier-protein] S-malonyltransferase activity [GO:0004314]	fatty acid biosynthetic process [GO:0006633]	NA	[acyl-carrier-protein] S-malonyltransferase activity [GO:0004314]	20210409_ALS_XL_F47.raw	44968
Intra	Cre06.g251600.t1.2	Cre06.g251600.t1.2	Eukaryotic translation initiation factor 5	Eukaryotic translation initiation factor 5	271	280	KAAEEEAR	1×DSSO [K1]	KKAEEEK	1×DSSO [K2]	97.31	97.31	1	FALSE	D5LAU2	D5LAU2	formation of cytoplasmic translation initiation complex [GO:0001732]; formation of translation preinitiation complex [GO:0001731]	cytosol [GO:0005829]	eukaryotic initiation factor eIF2 binding [GO:0071074]; GDP-dissociation inhibitor activity [GO:0005092]; GTP binding [GO:0005525]; translation initiation factor activity [GO:0003743]	formation of cytoplasmic translation initiation complex [GO:0001732]; formation of translation preinitiation complex [GO:0001731]	cytosol [GO:0005829]	eukaryotic initiation factor eIF2 binding [GO:0071074]; GDP-dissociation inhibitor activity [GO:0005092]; GTP binding [GO:0005525]; translation initiation factor activity [GO:0003743]	20210409_ALS_XL_F61.raw	3746
Intra	Cre12.g498600.t1.2	Cre12.g498600.t1.2	Eukaryotic translation elongation factor 1 alpha	Eukaryotic translation elongation factor 1 alpha	387	413	TGDVMILKSDQTLK	1×Oxidation [M5]; 1×DSSO [K8]	KGYSPIGFVR	1×DSSO [K1]	97.09	56.34	1	FALSE	A0A2K3D3E1	A0A2K3D3E1	translation [GO:0006412]	NA	GTPase activity [GO:0003924]; GTP binding [GO:0005525]	translation [GO:0006412]	NA	GTPase activity [GO:0003924]; GTP binding [GO:0005525]	20210409_ALS_XL_F53.raw	36207
Intra	Cre01.g013350.t1.2	Cre01.g013350.t1.2	None	None	207	181	AAESAVEDKKR	1×DSSO [K10]	KKADDYAAK	1×DSSO [K1]	97.07	97.07	1	TRUE	A8HPE9	A8HPE9	NA	NA	NA	NA	NA	NA	20210409_ALS_XL_F64.raw	9456
Intra	Cre07.g339150.t1.1	Cre07.g339150.t1.1	Chaperonin 60B2	Chaperonin 60B2	103	358	EVELEDPVENIGAKLVR	1×DSSO [K14]	VSISKEATTIVGDGR	1×DSSO [K5]	96.71	48.89	1	TRUE	A8ITH8	A8ITH8	protein folding [GO:0006457]; protein refolding [GO:0042026]	NA	ATPase activity [GO:0016887]; ATP binding [GO:0005524]	protein folding [GO:0006457]; protein refolding [GO:0042026]	NA	ATPase activity [GO:0016887]; ATP binding [GO:0005524]	20210409_ALS_XL_F46.raw	44690
Intra	Cre06.g256250.t1.2	Cre06.g256250.t1.2	Thylakoid lumenal protein	Thylakoid lumenal protein	102	109	RLEQELVPVQKAVYK	1×DSSO [K11]	LAKSGSQLESGDLK	1×DSSO [K3]	96.69	64.18	1	TRUE	A8HY43	A8HY43	photosystem II repair [GO:0010206]	NA	NA	photosystem II repair [GO:0010206]	NA	NA	20210409_ALS_XL_F57.raw	28673
Inter	Cre10.g456200.t1.2	Cre09.g391097.t2.1	Cytosolic 80S ribosomal protein S24	Cytosolic 80S ribosomal protein L4	82	138	STGFGLIYDDLKAAK	1×DSSO [K12]	AAAGPQKAAPK	1×DSSO [K7]	96.44	70.21	2	FALSE	A8I0I1	A8J1A3	translation [GO:0006412]	ribosome [GO:0005840]	structural constituent of ribosome [GO:0003735]	NA	ribosome [GO:0005840]	NA	20210409_ALS_XL_F52.raw	38137
Intra	Cre16.g659950.t1.1	Cre16.g659950.t1.1	Chloroplast Ribosomal Protein S5	Chloroplast Ribosomal Protein S5	563	570	EVATAVKR	1×DSSO [K7]	ALVDAKK	1×DSSO [K6]	96.37	22.87	1	TRUE	A8J8M5	A8J8M5	translation [GO:0006412]	mitochondrial small ribosomal subunit [GO:0005763]	RNA binding [GO:0003723]; structural constituent of ribosome [GO:0003735]	translation [GO:0006412]	mitochondrial small ribosomal subunit [GO:0005763]	RNA binding [GO:0003723]; structural constituent of ribosome [GO:0003735]	20210409_ALS_XL_F56.raw	14513
Intra	Cre10.g432450.t1.1	Cre10.g432450.t1.1	(1 of 25) PF13637 - Ankyrin repeats (many copies) (Ank_4)	(1 of 25) PF13637 - Ankyrin repeats (many copies) (Ank_4)	1120	1113	KALQQHLDDVAR	1×DSSO [K1]	KAVQAQR	1×DSSO [K1]	96.37	28.61	1	TRUE	A0A2K3D9Y6	A0A2K3D9Y6	meiotic chromosome condensation [GO:0010032]; mitotic chromosome condensation [GO:0007076]	condensed chromosome, centromeric region [GO:0000779]	chromatin binding [GO:0003682]; histone binding [GO:0042393]	meiotic chromosome condensation [GO:0010032]; mitotic chromosome condensation [GO:0007076]	condensed chromosome, centromeric region [GO:0000779]	chromatin binding [GO:0003682]; histone binding [GO:0042393]	20210409_ALS_XL_F59.raw	15170
Intra	Cre09.g415800.t1.2	Cre09.g415800.t1.2	MA3 domain-containing protein	MA3 domain-containing protein	47	68	AAANHKAAAASGER	1×DSSO [K6]	KGGGGGK	1×DSSO [K1]	96.37	15.15	1	TRUE	A0A2K3DG12	A0A2K3DG12	negative regulation of transcription, DNA-templated [GO:0045892]	cytoplasm [GO:0005737]	NA	negative regulation of transcription, DNA-templated [GO:0045892]	cytoplasm [GO:0005737]	NA	20210409_ALS_XL_F60.raw	3886
Intra	Cre12.g560900.t1.2	Cre12.g560900.t1.2	Flavin-containing amine oxidase	Flavin-containing amine oxidase	303	311	GVVVAVEGPEAKR	1×DSSO [K12]	LLGDAIKAAPSK	1×DSSO [K7]	96.25	43.49	1	TRUE	A0A2K3D5G7	A0A2K3D5G7	NA	NA	oxidoreductase activity [GO:0016491]	NA	NA	oxidoreductase activity [GO:0016491]	20210409_ALS_XL_F50.raw	29823
Intra	Cre02.g080700.t1.2	Cre02.g080700.t1.2	Endoplasmic reticulum associated Hsp70 protein	Endoplasmic reticulum associated Hsp70 protein	107	344	KYEDKEVQR	1×DSSO [K5]	KAMDDANLKK	1×Oxidation [M3]; 1×DSSO [K1]	96.12	30.86	2	FALSE	A8I7T8	A8I7T8	cellular response to unfolded protein [GO:0034620]; chaperone cofactor-dependent protein refolding [GO:0051085]; endoplasmic reticulum unfolded protein response [GO:0030968]; protein refolding [GO:0042026]; ubiquitin-dependent ERAD pathway [GO:0030433]	cytoplasm [GO:0005737]; endoplasmic reticulum chaperone complex [GO:0034663]; endoplasmic reticulum lumen [GO:0005788]; membrane [GO:0016020]; nucleus [GO:0005634]	ATPase activity [GO:0016887]; ATP binding [GO:0005524]; heat shock protein binding [GO:0031072]; misfolded protein binding [GO:0051787]; protein folding chaperone [GO:0044183]; unfolded protein binding [GO:0051082]	cellular response to unfolded protein [GO:0034620]; chaperone cofactor-dependent protein refolding [GO:0051085]; endoplasmic reticulum unfolded protein response [GO:0030968]; protein refolding [GO:0042026]; ubiquitin-dependent ERAD pathway [GO:0030433]	cytoplasm [GO:0005737]; endoplasmic reticulum chaperone complex [GO:0034663]; endoplasmic reticulum lumen [GO:0005788]; membrane [GO:0016020]; nucleus [GO:0005634]	ATPase activity [GO:0016887]; ATP binding [GO:0005524]; heat shock protein binding [GO:0031072]; misfolded protein binding [GO:0051787]; protein folding chaperone [GO:0044183]; unfolded protein binding [GO:0051082]	20210409_ALS_XL_F61.raw	11067
Intra	Cre08.g358562.t1.1	Cre08.g358562.t1.1	Chaperonin 20	Chaperonin 20	77	124	NKPTAGSIIALGDAKSVK	1×DSSO [K15]	IAQLKPLSDR	1×DSSO [K5]	96.05	50.22	1	TRUE	A0A2K3DG79	A0A2K3DG79	chaperone cofactor-dependent protein refolding [GO:0051085]	chloroplast [GO:0009507]; mitochondrial matrix [GO:0005759]; plastid [GO:0009536]	ATPase activity [GO:0016887]; ATP binding [GO:0005524]; chaperone binding [GO:0051087]; metal ion binding [GO:0046872]; unfolded protein binding [GO:0051082]	chaperone cofactor-dependent protein refolding [GO:0051085]	chloroplast [GO:0009507]; mitochondrial matrix [GO:0005759]; plastid [GO:0009536]	ATPase activity [GO:0016887]; ATP binding [GO:0005524]; chaperone binding [GO:0051087]; metal ion binding [GO:0046872]; unfolded protein binding [GO:0051082]	20210409_ALS_XL_F57.raw	32070
Intra	Cre06.g275100.t1.2	Cre06.g275100.t1.2	Nucleolin	Nucleolin	25	55	KKPEPESDSDEESDDSDDSDDAPAVKK	1×DSSO [K2]	AAPAKAPAKK	1×DSSO [K5]	96.05	82.4	1	TRUE	A0A2K3DNK6	A0A2K3DNK6	NA	ribonucleoprotein complex [GO:1990904]	RNA binding [GO:0003723]	NA	ribonucleoprotein complex [GO:1990904]	RNA binding [GO:0003723]	20210409_ALS_XL_F61.raw	10134
Intra	Cre06.g282500.t1.2	Cre06.g282500.t1.2	Cytosolic 80S ribosomal protein L23a	Cytosolic 80S ribosomal protein L23a	10	18	GKADAKAVAAK	1×DSSO [K6]	AAKAVKK	1×DSSO [K3]	96.04	28.71	4	TRUE	A8J239	A8J239	ribosomal large subunit assembly [GO:0000027]; translation [GO:0006412]	cytosolic large ribosomal subunit [GO:0022625]	structural constituent of ribosome [GO:0003735]	ribosomal large subunit assembly [GO:0000027]; translation [GO:0006412]	cytosolic large ribosomal subunit [GO:0022625]	structural constituent of ribosome [GO:0003735]	20210409_ALS_XL_F63.raw	5414
Intra	Cre17.g715350.t2.1	Cre17.g715350.t2.1	ARF-GAP domain 9	ARF-GAP domain 9	332	326	FANAKAISSR	1×DSSO [K5]	VQEESLKK	1×DSSO [K7]	95.86	49.38	1	FALSE	A0A2K3CPX1	A0A2K3CPX1	NA	NA	GTPase activator activity [GO:0005096]	NA	NA	GTPase activator activity [GO:0005096]	20210409_ALS_XL_F56.raw	16565
Intra	Cre03.g194350.t1.2	Cre03.g194350.t1.2	proton pump interactor 1	proton pump interactor 1	582	573	AAEAAAKAAAEAK	1×DSSO [K7]	AAAEAKKK	1×DSSO [K6]	95.86	13.99	1	TRUE	A0A2K3DYI3	A0A2K3DYI3	NA	integral component of membrane [GO:0016021]	NA	NA	integral component of membrane [GO:0016021]	NA	20210409_ALS_XL_F58.raw	9242
Intra	Cre03.g206600.t1.2	Cre03.g206600.t1.2	Acetohydroxyacid dehydratase	Acetohydroxyacid dehydratase	561	548	VMDMKISDQELAARK	2×Oxidation [M2; M4]; 1×DSSO [K5]	NGDKIVIDVEKR	1×DSSO [K4]	95.74	48.75	1	TRUE	A8IX80	A8IX80	branched-chain amino acid biosynthetic process [GO:0009082]; cellular amino acid biosynthetic process [GO:0008652]	chloroplast stroma [GO:0009570]	4 iron, 4 sulfur cluster binding [GO:0051539]; dihydroxy-acid dehydratase activity [GO:0004160]; metal ion binding [GO:0046872]	branched-chain amino acid biosynthetic process [GO:0009082]; cellular amino acid biosynthetic process [GO:0008652]	chloroplast stroma [GO:0009570]	4 iron, 4 sulfur cluster binding [GO:0051539]; dihydroxy-acid dehydratase activity [GO:0004160]; metal ion binding [GO:0046872]	20210409_ALS_XL_F60.raw	25808
Intra	Cre06.g258700.t1.1	Cre06.g258700.t1.1	Pyruvate carboxylase	Pyruvate carboxylase	293	287	AHKGVLITDTTMR	1×Oxidation [M12]; 1×DSSO [K3]	EGPDGWAKAVR	1×DSSO [K8]	95.62	65.45	1	TRUE	A0A2K3DMK8	A0A2K3DMK8	gluconeogenesis [GO:0006094]; pyruvate metabolic process [GO:0006090]	cytoplasm [GO:0005737]	ATP binding [GO:0005524]; metal ion binding [GO:0046872]; pyruvate carboxylase activity [GO:0004736]	gluconeogenesis [GO:0006094]; pyruvate metabolic process [GO:0006090]	cytoplasm [GO:0005737]	ATP binding [GO:0005524]; metal ion binding [GO:0046872]; pyruvate carboxylase activity [GO:0004736]	20210409_ALS_XL_F59.raw	27555
Intra	Cre09.g405400.t1.2	Cre09.g405400.t1.2	Prefoldin molecular chaperone, subunit 1-related protein	Prefoldin molecular chaperone, subunit 1-related protein	104	93	EAIEQKMKDTEAQIR	1×Oxidation [M7]; 1×DSSO [K6]	KLKDQR	1×DSSO [K1]	95.35	95.35	5	TRUE	A8J814	A8J814	protein folding [GO:0006457]	cytoplasm [GO:0005737]; prefoldin complex [GO:0016272]	protein folding chaperone [GO:0044183]; unfolded protein binding [GO:0051082]	protein folding [GO:0006457]	cytoplasm [GO:0005737]; prefoldin complex [GO:0016272]	protein folding chaperone [GO:0044183]; unfolded protein binding [GO:0051082]	20210409_ALS_XL_F64.raw	17071
Intra	Cre09.g405400.t1.2	Cre09.g405400.t1.2	Prefoldin molecular chaperone, subunit 1-related protein	Prefoldin molecular chaperone, subunit 1-related protein	106	93	EAIEQKMKDTEAQIR	1×Oxidation [M7]; 1×DSSO [K8]	KLKDQR	1×DSSO [K1]	95.35	95.35	2	TRUE	A8J814	A8J814	protein folding [GO:0006457]	cytoplasm [GO:0005737]; prefoldin complex [GO:0016272]	protein folding chaperone [GO:0044183]; unfolded protein binding [GO:0051082]	protein folding [GO:0006457]	cytoplasm [GO:0005737]; prefoldin complex [GO:0016272]	protein folding chaperone [GO:0044183]; unfolded protein binding [GO:0051082]	20210409_ALS_XL_F64.raw	16323
Intra	Cre06.g269950.t1.2	Cre06.g269950.t1.2	Cell Division Cycle protein 48	Cell Division Cycle protein 48	18	28	DANKKDFSTAIMDR	1×Oxidation [M12]; 1×DSSO [K5]	KKSPNR	1×DSSO [K1]	95.35	95.35	3	TRUE	A8HW56	A8HW56	autophagosome maturation [GO:0097352]; ER-associated misfolded protein catabolic process [GO:0071712]; mitotic spindle disassembly [GO:0051228]; retrograde protein transport, ER to cytosol [GO:0030970]; ubiquitin-dependent ERAD pathway [GO:0030433]	cytosol [GO:0005829]; motile cilium [GO:0031514]; nucleus [GO:0005634]; VCP-NPL4-UFD1 AAA ATPase complex [GO:0034098]	ATPase activity [GO:0016887]; ATP binding [GO:0005524]; polyubiquitin modification-dependent protein binding [GO:0031593]	autophagosome maturation [GO:0097352]; ER-associated misfolded protein catabolic process [GO:0071712]; mitotic spindle disassembly [GO:0051228]; retrograde protein transport, ER to cytosol [GO:0030970]; ubiquitin-dependent ERAD pathway [GO:0030433]	cytosol [GO:0005829]; motile cilium [GO:0031514]; nucleus [GO:0005634]; VCP-NPL4-UFD1 AAA ATPase complex [GO:0034098]	ATPase activity [GO:0016887]; ATP binding [GO:0005524]; polyubiquitin modification-dependent protein binding [GO:0031593]	20210409_ALS_XL_F65.raw	14866
Intra	Cre06.g250250.t1.2	Cre06.g250250.t1.2	Vacuolar ATP synthase subunit C	Vacuolar ATP synthase subunit C	264	152	EYHAPTEGSELTTAQAEQLKK	1×DSSO [K20]	KAQGSLAVR	1×DSSO [K1]	94.67	48.1	1	TRUE	A8HYU2	A8HYU2	NA	vacuolar proton-transporting V-type ATPase, V1 domain [GO:0000221]	proton-transporting ATPase activity, rotational mechanism [GO:0046961]	NA	vacuolar proton-transporting V-type ATPase, V1 domain [GO:0000221]	proton-transporting ATPase activity, rotational mechanism [GO:0046961]	20210409_ALS_XL_F57.raw	22976
Intra	Cre06.g300700.t1.1	Cre06.g300700.t1.1	Flavin reductase	Flavin reductase	146	103	VDSEGNINIIEAAIKK	1×DSSO [K15]	GDALNKDDVQK	1×DSSO [K6]	94.65	91.15	1	TRUE	A0A2K3DR14	A0A2K3DR14	NA	NA	NA	NA	NA	NA	20210409_ALS_XL_F51.raw	37214
Intra	Cre10.g429100.t1.2	Cre10.g429100.t1.2	Class II aaRS and biotin synthetases superfamily protein	Class II aaRS and biotin synthetases superfamily protein	45	38	KSGGGAAAGGESK	1×DSSO [K1]	KEAKAEGEGK	1×DSSO [K4]	94.62	94.62	1	TRUE	A0A2K3D9Q8	A0A2K3D9Q8	prolyl-tRNA aminoacylation [GO:0006433]	aminoacyl-tRNA synthetase multienzyme complex [GO:0017101]; cytoplasm [GO:0005737]	ATP binding [GO:0005524]; proline-tRNA ligase activity [GO:0004827]	prolyl-tRNA aminoacylation [GO:0006433]	aminoacyl-tRNA synthetase multienzyme complex [GO:0017101]; cytoplasm [GO:0005737]	ATP binding [GO:0005524]; proline-tRNA ligase activity [GO:0004827]	20210409_ALS_XL_F60.raw	3616
Inter	Cre06.g306300.t1.2	Cre11.g477733.t1.2	Magnesium chelatase subunit I, isoform 1	None	207	19	AFEPGLLAKANR	1×DSSO [K9]	RAEEVKAAEGR	1×DSSO [K6]	94.4	60.23	6	TRUE	A8IMZ5	A0A2K3D8F6	chlorophyll biosynthetic process [GO:0015995]; photosynthesis [GO:0015979]	chloroplast stroma [GO:0009570]	ATP binding [GO:0005524]; magnesium chelatase activity [GO:0016851]	NA	NA	NA	20210409_ALS_XL_F38.raw	31986
Intra	Cre12.g485150.t1.2	Cre12.g485150.t1.2	Glyceraldehyde 3-phosphate dehydrogenase	Glyceraldehyde 3-phosphate dehydrogenase	247	257	AVNGNIIPSSTGAAKAVGK	1×DSSO [K15]	VLPELKGK	1×DSSO [K6]	94.4	60.9	4	TRUE	A8JHR9	A8JHR9	glucose metabolic process [GO:0006006]; glycolytic process [GO:0006096]	cytosol [GO:0005829]	glyceraldehyde-3-phosphate dehydrogenase (NAD+) (phosphorylating) activity [GO:0004365]; NAD binding [GO:0051287]; NADP binding [GO:0050661]	glucose metabolic process [GO:0006006]; glycolytic process [GO:0006096]	cytosol [GO:0005829]	glyceraldehyde-3-phosphate dehydrogenase (NAD+) (phosphorylating) activity [GO:0004365]; NAD binding [GO:0051287]; NADP binding [GO:0050661]	20210409_ALS_XL_F49.raw	30388
Intra	Cre02.g141400.t1.2	Cre02.g141400.t1.2	Phosphoenolpyruvate carboxykinase	Phosphoenolpyruvate carboxykinase	601	608	ILTGGPQPIAKEDVEKK	1×DSSO [K16]	GFGAFKTQ	1×DSSO [K6]	94.4	87.18	2	TRUE	A8J0N7	A8J0N7	gluconeogenesis [GO:0006094]	cytosol [GO:0005829]	ATP binding [GO:0005524]; kinase activity [GO:0016301]; phosphoenolpyruvate carboxykinase (ATP) activity [GO:0004612]	gluconeogenesis [GO:0006094]	cytosol [GO:0005829]	ATP binding [GO:0005524]; kinase activity [GO:0016301]; phosphoenolpyruvate carboxykinase (ATP) activity [GO:0004612]	20210409_ALS_XL_F53.raw	30340
Intra	Cre06.g278238.t1.1	Cre06.g278238.t1.1	Uncharacterised protein family SERF	Uncharacterised protein family SERF	46	50	ALAEKIAK	1×DSSO [K5]	KEGAGAK	1×DSSO [K1]	94.4	19.6	2	TRUE	A8J8W7	A8J8W7	NA	NA	NA	NA	NA	NA	20210409_ALS_XL_F56.raw	10891
Intra	Cre02.g075700.t1.2	Cre02.g075700.t1.2	Cytosolic 80S ribosomal protein L19	Cytosolic 80S ribosomal protein L19	144	133	VLMEAVHKQK	1×Oxidation [M3]; 1×DSSO [K8]	GNVFKNKR	1×DSSO [K5]	94.4	94.4	1	TRUE	A8IA18	A8IA18	translation [GO:0006412]	cytosolic large ribosomal subunit [GO:0022625]	RNA binding [GO:0003723]; structural constituent of ribosome [GO:0003735]	translation [GO:0006412]	cytosolic large ribosomal subunit [GO:0022625]	RNA binding [GO:0003723]; structural constituent of ribosome [GO:0003735]	20210409_ALS_XL_F65.raw	13838
Intra	Cre01.g040000.t1.2	Cre01.g040000.t1.2	Cytosolic 80S ribosomal protein L26	Cytosolic 80S ribosomal protein L26	109	115	LKLDKDR	1×DSSO [K2]	KALLER	1×DSSO [K1]	94.27	18	3	TRUE	A8HMG7	A8HMG7	cytoplasmic translation [GO:0002181]; ribosomal large subunit biogenesis [GO:0042273]	cytosolic large ribosomal subunit [GO:0022625]	RNA binding [GO:0003723]; structural constituent of ribosome [GO:0003735]	cytoplasmic translation [GO:0002181]; ribosomal large subunit biogenesis [GO:0042273]	cytosolic large ribosomal subunit [GO:0022625]	RNA binding [GO:0003723]; structural constituent of ribosome [GO:0003735]	20210409_ALS_XL_F62.raw	18695
Intra	Cre01.g007774.t1.1	Cre01.g007774.t1.1	RING/U-box superfamily protein	RING/U-box superfamily protein	324	332	KAKAEAER	1×DSSO [K1]	KAAAER	1×DSSO [K1]	94.27	94.27	1	FALSE	A0A2K3E565	A0A2K3E565	NA	cytoplasm [GO:0005737]; nucleus [GO:0005634]	NA	NA	cytoplasm [GO:0005737]; nucleus [GO:0005634]	NA	20210409_ALS_XL_F63.raw	3572
Intra	Cre09.g396213.t1.1	Cre09.g396213.t1.1	Photosystem II Oxygen Evolution Enhancer protein 1	Photosystem II Oxygen Evolution Enhancer protein 1	235	206	ADAEELLKENVKITK	1×DSSO [K12]	GSSFLDPKGR	1×DSSO [K8]	93.82	93.82	3	TRUE	A8J0E4	A8J0E4	photosystem II assembly [GO:0010207]; photosystem II stabilization [GO:0042549]	photosystem II oxygen evolving complex [GO:0009654]	oxygen evolving activity [GO:0010242]	photosystem II assembly [GO:0010207]; photosystem II stabilization [GO:0042549]	photosystem II oxygen evolving complex [GO:0009654]	oxygen evolving activity [GO:0010242]	20210409_ALS_XL_F57.raw	35400
Intra	Cre05.g234550.t2.1	Cre05.g234550.t2.1	Fructose-1,6-bisphosphate aldolase	Fructose-1,6-bisphosphate aldolase	347	44	AKANSDAQQGKYDATTEGK	1×DSSO [K2]	TAGTVASKGR	1×DSSO [K8]	93.82	93.82	1	TRUE	Q42690	Q42690	fructose 1,6-bisphosphate metabolic process [GO:0030388]; glycolytic process [GO:0006096]	cytosol [GO:0005829]	fructose-bisphosphate aldolase activity [GO:0004332]	fructose 1,6-bisphosphate metabolic process [GO:0030388]; glycolytic process [GO:0006096]	cytosol [GO:0005829]	fructose-bisphosphate aldolase activity [GO:0004332]	20210409_ALS_XL_F58.raw	10865
Intra	Cre09.g391097.t2.1	Cre09.g391097.t2.1	Cytosolic 80S ribosomal protein L4	Cytosolic 80S ribosomal protein L4	131	142	AAAAKAAAGPQK	1×DSSO [K5]	AAPKVVGR	1×DSSO [K4]	93.76	42.71	2	FALSE	A8J1A3	A8J1A3	NA	ribosome [GO:0005840]	NA	NA	ribosome [GO:0005840]	NA	20210409_ALS_XL_F54.raw	10486
Intra	Cre09.g386750.t1.2	Cre09.g386750.t1.2	Heat shock protein 90A	Heat shock protein 90A	380	387	ETLQQNKILKVIK	1×DSSO [K7]	VIKKNIVKK	1×DSSO [K4]	109.6	109.6	2	TRUE	A8J1U1	A8J1U1	cellular response to heat [GO:0034605]; protein folding [GO:0006457]; protein stabilization [GO:0050821]	cytosol [GO:0005829]; perinuclear region of cytoplasm [GO:0048471]; plasma membrane [GO:0005886]; protein-containing complex [GO:0032991]	ATPase activity [GO:0016887]; ATP binding [GO:0005524]; unfolded protein binding [GO:0051082]	cellular response to heat [GO:0034605]; protein folding [GO:0006457]; protein stabilization [GO:0050821]	cytosol [GO:0005829]; perinuclear region of cytoplasm [GO:0048471]; plasma membrane [GO:0005886]; protein-containing complex [GO:0032991]	ATPase activity [GO:0016887]; ATP binding [GO:0005524]; unfolded protein binding [GO:0051082]	20210409_ALS_XL_F58.raw	20051
Intra	Cre12.g498600.t1.2	Cre12.g498600.t1.2	Eukaryotic translation elongation factor 1 alpha	Eukaryotic translation elongation factor 1 alpha	230	439	VGWKDDFVNK	1×DSSO [K4]	VGKETGGK	1×DSSO [K3]	93.76	51.95	2	FALSE	A0A2K3D3E1	A0A2K3D3E1	translation [GO:0006412]	NA	GTPase activity [GO:0003924]; GTP binding [GO:0005525]	translation [GO:0006412]	NA	GTPase activity [GO:0003924]; GTP binding [GO:0005525]	20210409_ALS_XL_F56.raw	23125
Intra	Cre12.g529651.t1.1	Cre12.g529651.t1.1	Cytosolic 80S ribosomal protein L7a	Cytosolic 80S ribosomal protein L7a	55	60	EAGKEAEK	1×DSSO [K4]	KKPVVVK	1×DSSO [K1]	93.76	93.76	3	TRUE	A0A2K3D4Q4	A0A2K3D4Q4	maturation of LSU-rRNA [GO:0000470]	cytosolic large ribosomal subunit [GO:0022625]	RNA binding [GO:0003723]	maturation of LSU-rRNA [GO:0000470]	cytosolic large ribosomal subunit [GO:0022625]	RNA binding [GO:0003723]	20210409_ALS_XL_F60.raw	7230
Intra	Cre18.g749847.t1.1	Cre18.g749847.t1.1	Dihydrolipoyl dehydrogenase	Dihydrolipoyl dehydrogenase	146	138	NKVEYVKGWGK	1×DSSO [K7]	GIEGLFKK	1×DSSO [K7]	93.76	33.85	1	TRUE	A8J1T4	A8J1T4	cell redox homeostasis [GO:0045454]	mitochondrion [GO:0005739]; oxoglutarate dehydrogenase complex [GO:0045252]	dihydrolipoyl dehydrogenase activity [GO:0004148]; flavin adenine dinucleotide binding [GO:0050660]	cell redox homeostasis [GO:0045454]	mitochondrion [GO:0005739]; oxoglutarate dehydrogenase complex [GO:0045252]	dihydrolipoyl dehydrogenase activity [GO:0004148]; flavin adenine dinucleotide binding [GO:0050660]	20210409_ALS_XL_F60.raw	33124
Inter	Cre08.g360900.t1.2	Cre01.g027000.t1.2	Cytosolic 80S ribosomal protein S15	Cytosolic 80S ribosomal protein L11	8	81	ADAAGDKKR	1×Acetyl [A1]; 1×DSSO [K7]	AYDLVKR	1×DSSO [K6]	93.6	93.6	2	TRUE	A8J493	A8HQ81	ribosomal small subunit assembly [GO:0000028]; translation [GO:0006412]	cytosolic small ribosomal subunit [GO:0022627]	RNA binding [GO:0003723]; structural constituent of ribosome [GO:0003735]	translation [GO:0006412]	cytosolic large ribosomal subunit [GO:0022625]	RNA binding [GO:0003723]; structural constituent of ribosome [GO:0003735]	20210409_ALS_XL_F56.raw	16054
Intra	Cre06.g275100.t1.2	Cre06.g275100.t1.2	Nucleolin	Nucleolin	15	10	AKQAATKLEK	1×DSSO [K2]	ATGKELK	1×DSSO [K4]	93.6	23.95	3	TRUE	A0A2K3DNK6	A0A2K3DNK6	NA	ribonucleoprotein complex [GO:1990904]	RNA binding [GO:0003723]	NA	ribonucleoprotein complex [GO:1990904]	RNA binding [GO:0003723]	20210409_ALS_XL_F56.raw	5629
Inter	Cre08.g360900.t1.2	Cre01.g027000.t1.2	Cytosolic 80S ribosomal protein S15	Cytosolic 80S ribosomal protein L11	9	81	ADAAGDKKR	1×Acetyl [A1]; 1×DSSO [K8]	AYDLVKR	1×DSSO [K6]	93.6	93.6	3	TRUE	A8J493	A8HQ81	ribosomal small subunit assembly [GO:0000028]; translation [GO:0006412]	cytosolic small ribosomal subunit [GO:0022627]	RNA binding [GO:0003723]; structural constituent of ribosome [GO:0003735]	translation [GO:0006412]	cytosolic large ribosomal subunit [GO:0022625]	RNA binding [GO:0003723]; structural constituent of ribosome [GO:0003735]	20210409_ALS_XL_F56.raw	15801
Intra	Cre04.g217921.t1.1	Cre04.g217921.t1.1	Beta subunit of COP-I complex	Beta subunit of COP-I complex	657	665	AAFASLTHEKQR	1×DSSO [K10]	KASAQAR	1×DSSO [K1]	93.6	30.01	1	TRUE	A0A2K3DTG4	A0A2K3DTG4	endoplasmic reticulum to Golgi vesicle-mediated transport [GO:0006888]; intracellular protein transport [GO:0006886]; intra-Golgi vesicle-mediated transport [GO:0006891]	COPI vesicle coat [GO:0030126]; Golgi membrane [GO:0000139]	structural molecule activity [GO:0005198]	endoplasmic reticulum to Golgi vesicle-mediated transport [GO:0006888]; intracellular protein transport [GO:0006886]; intra-Golgi vesicle-mediated transport [GO:0006891]	COPI vesicle coat [GO:0030126]; Golgi membrane [GO:0000139]	structural molecule activity [GO:0005198]	20210409_ALS_XL_F60.raw	14415
Intra	gi|41179014|ref|NP_958369.1|	gi|41179014|ref|NP_958369.1|	ribosomal protein L2 (chloroplast)	ribosomal protein L2 (chloroplast)	357	381	DKIGVTAKVVR	1×DSSO [K8]	YEDGEKR	1×DSSO [K6]	93.6	56.04	2	TRUE	Q8HTL2	Q8HTL2	NA	NA	NA	NA	NA	NA	20210409_ALS_XL_F60.raw	17748
Intra	Cre14.g617900.t1.2	Cre14.g617900.t1.2	Cytosolic 80S ribosomal protein L35	Cytosolic 80S ribosomal protein L35	43	5	VTGGAPNKLSKIK	1×DSSO [K8]	VKMHELR	1×Oxidation [M3]; 1×DSSO [K2]	93.6	93.6	2	TRUE	A8HNX3	A8HNX3	maturation of LSU-rRNA from tricistronic rRNA transcript (SSU-rRNA, 5.8S rRNA, LSU-rRNA) [GO:0000463]; translation [GO:0006412]	cytosolic large ribosomal subunit [GO:0022625]	mRNA binding [GO:0003729]; structural constituent of ribosome [GO:0003735]	maturation of LSU-rRNA from tricistronic rRNA transcript (SSU-rRNA, 5.8S rRNA, LSU-rRNA) [GO:0000463]; translation [GO:0006412]	cytosolic large ribosomal subunit [GO:0022625]	mRNA binding [GO:0003729]; structural constituent of ribosome [GO:0003735]	20210409_ALS_XL_F63.raw	14183
Intra	Cre09.g397549.t1.1	Cre09.g397549.t1.1	Kinase-related protein of unknown function (DUF1296)	Kinase-related protein of unknown function (DUF1296)	9	4	KVIEAMKEATGASEEDVK	1×Oxidation [M6]; 1×DSSO [K1]	SDKQFPK	1×Acetyl [S1]; 1×DSSO [K3]	93.15	59.46	22	TRUE	A0A2K3DEQ6	A0A2K3DEQ6	NA	NA	NA	NA	NA	NA	20210409_ALS_XL_F40.raw	17388
Intra	Cre09.g393358.t1.1	Cre09.g393358.t1.1	Hyaluronan / mRNA binding family	Hyaluronan / mRNA binding family	34	29	EAPKEEAKPAKAPVAK	1×DSSO [K4]	APKPVKK	1×DSSO [K6]	93.15	93.15	4	TRUE	A8J087	A8J087	NA	cytoplasm [GO:0005737]; nucleus [GO:0005634]	RNA binding [GO:0003723]	NA	cytoplasm [GO:0005737]; nucleus [GO:0005634]	RNA binding [GO:0003723]	20210409_ALS_XL_F63.raw	8375
Intra	Cre02.g076350.t1.2	Cre02.g076350.t1.2	Vacuolar ATP synthase subunit B	Vacuolar ATP synthase subunit B	407	397	KDHSEVSNQLYANYAIGKDVAAMK	1×Oxidation [M23]; 1×DSSO [K1]	LMKSAIGEGMTR	2×Oxidation [M2; M10]; 1×DSSO [K3]	92.92	59.17	1	TRUE	A8IA45	A8IA45	ATP metabolic process [GO:0046034]; proton transmembrane transport [GO:1902600]	proton-transporting V-type ATPase, V1 domain [GO:0033180]	ATP binding [GO:0005524]	ATP metabolic process [GO:0046034]; proton transmembrane transport [GO:1902600]	proton-transporting V-type ATPase, V1 domain [GO:0033180]	ATP binding [GO:0005524]	20210409_ALS_XL_F58.raw	26617
Inter	Cre12.g537800.t1.2	Cre01.g011000.t1.2	Cytosolic 80S ribosomal protein L7	Cytosolic 80S ribosomal protein L6	1	47	STVVPELLAK	1×DSSO [S1]	AVAKQAEGK	1×DSSO [K4]	92.79	50.56	2	TRUE	A0A2K3D598	A8HP90	maturation of LSU-rRNA from tricistronic rRNA transcript (SSU-rRNA, 5.8S rRNA, LSU-rRNA) [GO:0000463]	cytosolic large ribosomal subunit [GO:0022625]	RNA binding [GO:0003723]; structural constituent of ribosome [GO:0003735]	cytoplasmic translation [GO:0002181]; ribosomal large subunit assembly [GO:0000027]	cytosolic large ribosomal subunit [GO:0022625]	RNA binding [GO:0003723]; structural constituent of ribosome [GO:0003735]	20210409_ALS_XL_F37.raw	26021
Intra	Cre05.g242000.t1.2	Cre05.g242000.t1.2	Magnesium chelatase subunit D, chloroplast precursor	Magnesium chelatase subunit D, chloroplast precursor	308	297	FQDKPQDTIDDTAELTDALR	1×DSSO [K4]	VKAIDAAIR	1×DSSO [K2]	92.79	63.49	1	TRUE	A8I531	A8I531	chlorophyll biosynthetic process [GO:0015995]; photosynthesis [GO:0015979]	chloroplast [GO:0009507]	ATP binding [GO:0005524]; magnesium chelatase activity [GO:0016851]	chlorophyll biosynthetic process [GO:0015995]; photosynthesis [GO:0015979]	chloroplast [GO:0009507]	ATP binding [GO:0005524]; magnesium chelatase activity [GO:0016851]	20210409_ALS_XL_F50.raw	40160
Intra	Cre10.g423650.t1.2	Cre10.g423650.t1.2	Chloroplast ribosomal protein L11	Chloroplast ribosomal protein L11	147	138	KLVDTNATKVESVVR	1×DSSO [K1]	KQVAEIAAK	1×DSSO [K1]	92.79	28.13	1	TRUE	A8ICE4	A8ICE4	translation [GO:0006412]	large ribosomal subunit [GO:0015934]	large ribosomal subunit rRNA binding [GO:0070180]; structural constituent of ribosome [GO:0003735]	translation [GO:0006412]	large ribosomal subunit [GO:0015934]	large ribosomal subunit rRNA binding [GO:0070180]; structural constituent of ribosome [GO:0003735]	20210409_ALS_XL_F57.raw	23232
Intra	Cre16.g688050.t1.1	Cre16.g688050.t1.1	eukaryotic translation initiation factor 4B1	eukaryotic translation initiation factor 4B1	243	257	RFDGPPPPSKADLEDSWGR	1×DSSO [K10]	EFKPSEPAAR	1×DSSO [K3]	92.69	60.58	1	TRUE	A0A2K3CUK8	A0A2K3CUK8	NA	NA	mRNA binding [GO:0003729]; translation initiation factor activity [GO:0003743]	NA	NA	mRNA binding [GO:0003729]; translation initiation factor activity [GO:0003743]	20210409_ALS_XL_F59.raw	32170
Intra	Cre06.g269950.t1.2	Cre06.g269950.t1.2	Cell Division Cycle protein 48	Cell Division Cycle protein 48	17	68	DANKKDFSTAIMDR	1×Oxidation [M12]; 1×DSSO [K4]	GDTVLLKGKK	1×DSSO [K7]	92.69	92.69	1	TRUE	A8HW56	A8HW56	autophagosome maturation [GO:0097352]; ER-associated misfolded protein catabolic process [GO:0071712]; mitotic spindle disassembly [GO:0051228]; retrograde protein transport, ER to cytosol [GO:0030970]; ubiquitin-dependent ERAD pathway [GO:0030433]	cytosol [GO:0005829]; motile cilium [GO:0031514]; nucleus [GO:0005634]; VCP-NPL4-UFD1 AAA ATPase complex [GO:0034098]	ATPase activity [GO:0016887]; ATP binding [GO:0005524]; polyubiquitin modification-dependent protein binding [GO:0031593]	autophagosome maturation [GO:0097352]; ER-associated misfolded protein catabolic process [GO:0071712]; mitotic spindle disassembly [GO:0051228]; retrograde protein transport, ER to cytosol [GO:0030970]; ubiquitin-dependent ERAD pathway [GO:0030433]	cytosol [GO:0005829]; motile cilium [GO:0031514]; nucleus [GO:0005634]; VCP-NPL4-UFD1 AAA ATPase complex [GO:0034098]	ATPase activity [GO:0016887]; ATP binding [GO:0005524]; polyubiquitin modification-dependent protein binding [GO:0031593]	20210409_ALS_XL_F61.raw	24714
Intra	Cre04.g222700.t1.2	Cre04.g222700.t1.2	Elongation Factor 3 and ABC transporter	Elongation Factor 3 and ABC transporter	52	19	VASGDASAADALAAHLKK	1×DSSO [K17]	IEEVSSKIAELPESK	1×DSSO [K7]	92.65	55.51	1	TRUE	A8ISZ1	A8ISZ1	NA	NA	ATPase activity [GO:0016887]; ATP binding [GO:0005524]; translation elongation factor activity [GO:0003746]	NA	NA	ATPase activity [GO:0016887]; ATP binding [GO:0005524]; translation elongation factor activity [GO:0003746]	20210409_ALS_XL_F55.raw	34899
Intra	Cre12.g497300.t2.1	Cre12.g497300.t2.1	Rhodanese-like Ca-sensing receptor	Rhodanese-like Ca-sensing receptor	116	87	EVVDAVGPVVVEAAKK	1×DSSO [K15]	AGITTLQSGVKILK	1×DSSO [K11]	92.48	57.17	1	TRUE	A8JGM1	A8JGM1	NA	NA	NA	NA	NA	NA	20210409_ALS_XL_F45.raw	38761
Intra	Cre08.g372450.t1.2	Cre08.g372450.t1.2	Photosystem II Oxygen Evolution Enhancer protein 3	Photosystem II Oxygen Evolution Enhancer protein 3	175	183	EKDQASAAK	1×DSSO [K2]	KLEITK	1×DSSO [K1]	92.38	14.46	1	TRUE	A8JEV1	A8JEV1	photosynthetic electron transport chain [GO:0009767]	chloroplast [GO:0009507]; extrinsic component of membrane [GO:0019898]; photosystem II oxygen evolving complex [GO:0009654]	calcium ion binding [GO:0005509]; electron transporter, transferring electrons within the cyclic electron transport pathway of photosynthesis activity [GO:0045156]	photosynthetic electron transport chain [GO:0009767]	chloroplast [GO:0009507]; extrinsic component of membrane [GO:0019898]; photosystem II oxygen evolving complex [GO:0009654]	calcium ion binding [GO:0005509]; electron transporter, transferring electrons within the cyclic electron transport pathway of photosynthesis activity [GO:0045156]	20210409_ALS_XL_F56.raw	10829
Intra	Cre09.g386750.t1.2	Cre09.g386750.t1.2	Heat shock protein 90A	Heat shock protein 90A	473	555	KAVENSPFLER	1×DSSO [K1]	DILGDKVEK	1×DSSO [K6]	106.91	59.84	1	TRUE	A8J1U1	A8J1U1	cellular response to heat [GO:0034605]; protein folding [GO:0006457]; protein stabilization [GO:0050821]	cytosol [GO:0005829]; perinuclear region of cytoplasm [GO:0048471]; plasma membrane [GO:0005886]; protein-containing complex [GO:0032991]	ATPase activity [GO:0016887]; ATP binding [GO:0005524]; unfolded protein binding [GO:0051082]	cellular response to heat [GO:0034605]; protein folding [GO:0006457]; protein stabilization [GO:0050821]	cytosol [GO:0005829]; perinuclear region of cytoplasm [GO:0048471]; plasma membrane [GO:0005886]; protein-containing complex [GO:0032991]	ATPase activity [GO:0016887]; ATP binding [GO:0005524]; unfolded protein binding [GO:0051082]	20210409_ALS_XL_F54.raw	31114
Intra	Cre02.g114600.t1.2	Cre02.g114600.t1.2	2-cys Peroxiredoxin	2-cys Peroxiredoxin	90	184	TKGGLGGCKYPLVADLTK	1×Carbamidomethyl [C8]; 1×DSSO [K2]	TMKADPTK	1×DSSO [K3]	92.28	92.28	1	TRUE	A8I2V3	A8I2V3	cell redox homeostasis [GO:0045454]	cytosol [GO:0005829]	peroxidase activity [GO:0004601]; peroxiredoxin activity [GO:0051920]	cell redox homeostasis [GO:0045454]	cytosol [GO:0005829]	peroxidase activity [GO:0004601]; peroxiredoxin activity [GO:0051920]	20210409_ALS_XL_F57.raw	28866
Intra	Cre03.g155650.t1.2	Cre03.g155650.t1.2	Clathrin light chain	Clathrin light chain	134	125	KKDATESAAK	1×DSSO [K2]	KQNAETLK	1×DSSO [K1]	92.28	92.28	1	TRUE	A8J7K1	A8J7K1	clathrin coat assembly [GO:0048268]; clathrin-dependent endocytosis [GO:0072583]; intracellular protein transport [GO:0006886]	clathrin coat of coated pit [GO:0030132]; clathrin coat of trans-Golgi network vesicle [GO:0030130]; clathrin vesicle coat [GO:0030125]; plasma membrane [GO:0005886]	clathrin heavy chain binding [GO:0032050]; structural molecule activity [GO:0005198]	clathrin coat assembly [GO:0048268]; clathrin-dependent endocytosis [GO:0072583]; intracellular protein transport [GO:0006886]	clathrin coat of coated pit [GO:0030132]; clathrin coat of trans-Golgi network vesicle [GO:0030130]; clathrin vesicle coat [GO:0030125]; plasma membrane [GO:0005886]	clathrin heavy chain binding [GO:0032050]; structural molecule activity [GO:0005198]	20210409_ALS_XL_F59.raw	5557
Intra	Cre09.g391097.t2.1	Cre09.g391097.t2.1	Cytosolic 80S ribosomal protein L4	Cytosolic 80S ribosomal protein L4	95	100	SIVGTSLEVIQKK	1×DSSO [K12]	RAEKPEVR	1×DSSO [K4]	92.28	36.01	2	FALSE	A8J1A3	A8J1A3	NA	ribosome [GO:0005840]	NA	NA	ribosome [GO:0005840]	NA	20210409_ALS_XL_F59.raw	29073
Intra	Cre09.g386750.t1.2	Cre09.g386750.t1.2	Heat shock protein 90A	Heat shock protein 90A	473	588	KAVENSPFLER	1×DSSO [K1]	IMKAQALR	1×Oxidation [M2]; 1×DSSO [K3]	101.72	54.66	1	TRUE	A8J1U1	A8J1U1	cellular response to heat [GO:0034605]; protein folding [GO:0006457]; protein stabilization [GO:0050821]	cytosol [GO:0005829]; perinuclear region of cytoplasm [GO:0048471]; plasma membrane [GO:0005886]; protein-containing complex [GO:0032991]	ATPase activity [GO:0016887]; ATP binding [GO:0005524]; unfolded protein binding [GO:0051082]	cellular response to heat [GO:0034605]; protein folding [GO:0006457]; protein stabilization [GO:0050821]	cytosol [GO:0005829]; perinuclear region of cytoplasm [GO:0048471]; plasma membrane [GO:0005886]; protein-containing complex [GO:0032991]	ATPase activity [GO:0016887]; ATP binding [GO:0005524]; unfolded protein binding [GO:0051082]	20210409_ALS_XL_F55.raw	23822
Intra	Cre06.g249750.t1.1	Cre06.g249750.t1.1	(1 of 1) PF07382//PF13374 - Histone H1-like nucleoprotein HC2 (HC2) // Tetratricopeptide repeat (TPR_10)	(1 of 1) PF07382//PF13374 - Histone H1-like nucleoprotein HC2 (HC2) // Tetratricopeptide repeat (TPR_10)	459	463	VVGVKHAR	1×DSSO [K5]	KALDVLK	1×DSSO [K1]	92.28	4.43	1	TRUE	A0A2K3DLW7	A0A2K3DLW7	chromosome condensation [GO:0030261]	NA	DNA binding [GO:0003677]	chromosome condensation [GO:0030261]	NA	DNA binding [GO:0003677]	20210409_ALS_XL_F60.raw	19849
Inter	Cre11.g478800.t1.2	Cre16.g660150.t1.2	None	Ribosomal protein S10p/S20e family protein	408	4	AAEPAKPK	1×DSSO [K6]	ATKAGVEK	1×Acetyl [A1]; 1×DSSO [K3]	92.08	12.14	1	TRUE	A0A2K3D8I4	A0A2K3CTK0	intracellular mRNA localization [GO:0008298]	endoplasmic reticulum [GO:0005783]; nuclear outer membrane-endoplasmic reticulum membrane network [GO:0042175]; ribonucleoprotein complex [GO:1990904]	NA	translation [GO:0006412]	cytosolic small ribosomal subunit [GO:0022627]; small ribosomal subunit [GO:0015935]	structural constituent of ribosome [GO:0003735]	20210409_ALS_XL_F39.raw	11013
Intra	Cre09.g386750.t1.2	Cre09.g386750.t1.2	Heat shock protein 90A	Heat shock protein 90A	451	458	YHSTKSGEETTSLKDYVTR	1×DSSO [K14]	MKEGQK	1×Oxidation [M1]; 1×DSSO [K2]	99.63	99.63	1	FALSE	A8J1U1	A8J1U1	cellular response to heat [GO:0034605]; protein folding [GO:0006457]; protein stabilization [GO:0050821]	cytosol [GO:0005829]; perinuclear region of cytoplasm [GO:0048471]; plasma membrane [GO:0005886]; protein-containing complex [GO:0032991]	ATPase activity [GO:0016887]; ATP binding [GO:0005524]; unfolded protein binding [GO:0051082]	cellular response to heat [GO:0034605]; protein folding [GO:0006457]; protein stabilization [GO:0050821]	cytosol [GO:0005829]; perinuclear region of cytoplasm [GO:0048471]; plasma membrane [GO:0005886]; protein-containing complex [GO:0032991]	ATPase activity [GO:0016887]; ATP binding [GO:0005524]; unfolded protein binding [GO:0051082]	20210409_ALS_XL_F63.raw	17514
Intra	Cre04.g222700.t1.2	Cre04.g222700.t1.2	Elongation Factor 3 and ABC transporter	Elongation Factor 3 and ABC transporter	802	792	LTEEEQKK	1×DSSO [K7]	EAQEKETR	1×DSSO [K5]	92.08	28.26	1	TRUE	A8ISZ1	A8ISZ1	NA	NA	ATPase activity [GO:0016887]; ATP binding [GO:0005524]; translation elongation factor activity [GO:0003746]	NA	NA	ATPase activity [GO:0016887]; ATP binding [GO:0005524]; translation elongation factor activity [GO:0003746]	20210409_ALS_XL_F56.raw	6440
Intra	Cre06.g258733.t1.1	Cre06.g258733.t1.1	Isopropylmalate synthase	Isopropylmalate synthase	255	23	AIVGANAFAHESGIHQDGMLKNR	1×Oxidation [M19]; 1×DSSO [K21]	TKLQDLER	1×DSSO [K2]	92.08	49.07	1	TRUE	A0A2K3DMI3	A0A2K3DMI3	branched-chain amino acid biosynthetic process [GO:0009082]; leucine biosynthetic process [GO:0009098]	NA	2-isopropylmalate synthase activity [GO:0003852]	branched-chain amino acid biosynthetic process [GO:0009082]; leucine biosynthetic process [GO:0009098]	NA	2-isopropylmalate synthase activity [GO:0003852]	20210409_ALS_XL_F59.raw	28416
Intra	Cre12.g498600.t1.2	Cre12.g498600.t1.2	Eukaryotic translation elongation factor 1 alpha	Eukaryotic translation elongation factor 1 alpha	171	439	GDHKAGEIQGQTR	1×DSSO [K4]	VGKETGGK	1×DSSO [K3]	92.04	42.61	2	FALSE	A0A2K3D3E1	A0A2K3D3E1	translation [GO:0006412]	NA	GTPase activity [GO:0003924]; GTP binding [GO:0005525]	translation [GO:0006412]	NA	GTPase activity [GO:0003924]; GTP binding [GO:0005525]	20210409_ALS_XL_F59.raw	8327
Inter	Cre08.g382500.t1.2	Cre06.g272950.t1.1	Cytosolic 80S ribosomal protein S25	Cytosolic 80S ribosomal protein S18	23	153	ALAAANSSKGKR	1×DSSO [K11]	TVGVAKKK	1×DSSO [K8]	92.04	92.04	1	TRUE	A8IZ36	A8HVP2	NA	cytosolic small ribosomal subunit [GO:0022627]	structural constituent of ribosome [GO:0003735]	translation [GO:0006412]	cytosol [GO:0005829]; small ribosomal subunit [GO:0015935]	RNA binding [GO:0003723]; structural constituent of ribosome [GO:0003735]	20210409_ALS_XL_F63.raw	7503
Intra	Cre10.g456200.t1.2	Cre10.g456200.t1.2	Cytosolic 80S ribosomal protein S24	Cytosolic 80S ribosomal protein S24	101	130	NGLEKKVEK	1×DSSO [K6]	NAGAGKK	1×DSSO [K6]	91.93	91.93	1	TRUE	A8I0I1	A8I0I1	translation [GO:0006412]	ribosome [GO:0005840]	structural constituent of ribosome [GO:0003735]	translation [GO:0006412]	ribosome [GO:0005840]	structural constituent of ribosome [GO:0003735]	20210409_ALS_XL_F61.raw	7371
Intra	Cre09.g393358.t1.1	Cre09.g393358.t1.1	Hyaluronan / mRNA binding family	Hyaluronan / mRNA binding family	236	229	VFTKQSTEEQGLDLAAVEK	1×DSSO [K4]	NVDPNAELKGLK	1×DSSO [K9]	91.91	69.37	1	TRUE	A8J087	A8J087	NA	cytoplasm [GO:0005737]; nucleus [GO:0005634]	RNA binding [GO:0003723]	NA	cytoplasm [GO:0005737]; nucleus [GO:0005634]	RNA binding [GO:0003723]	20210409_ALS_XL_F48.raw	35643
Intra	Cre18.g749497.t1.1	Cre18.g749497.t1.1	Glycinamide ribonucleotide (GAR) synthetase	Glycinamide ribonucleotide (GAR) synthetase	378	185	GYPGEYPKGSVIR	1×DSSO [K8]	ASGLAAGKGVVVAR	1×DSSO [K8]	91.9	35.61	1	FALSE	A0A2K3CNK2	A0A2K3CNK2	'de novo' IMP biosynthetic process [GO:0006189]; purine nucleobase biosynthetic process [GO:0009113]	NA	ATP binding [GO:0005524]; metal ion binding [GO:0046872]; phosphoribosylamine-glycine ligase activity [GO:0004637]	'de novo' IMP biosynthetic process [GO:0006189]; purine nucleobase biosynthetic process [GO:0009113]	NA	ATP binding [GO:0005524]; metal ion binding [GO:0046872]; phosphoribosylamine-glycine ligase activity [GO:0004637]	20210409_ALS_XL_F54.raw	27628
Intra	Cre12.g498600.t1.2	Cre12.g498600.t1.2	Eukaryotic translation elongation factor 1 alpha	Eukaryotic translation elongation factor 1 alpha	387	374	TGDVMILKSDQTLK	1×Oxidation [M5]; 1×DSSO [K8]	GLDKGNMPR	1×Oxidation [M7]; 1×DSSO [K4]	91.8	49.59	4	FALSE	A0A2K3D3E1	A0A2K3D3E1	translation [GO:0006412]	NA	GTPase activity [GO:0003924]; GTP binding [GO:0005525]	translation [GO:0006412]	NA	GTPase activity [GO:0003924]; GTP binding [GO:0005525]	20210409_ALS_XL_F54.raw	26075
Intra	Cre08.g372450.t1.2	Cre08.g372450.t1.2	Photosystem II Oxygen Evolution Enhancer protein 3	Photosystem II Oxygen Evolution Enhancer protein 3	146	99	FDLNTLASTKEKEAK	1×DSSO [K10]	ASLDETKKR	1×DSSO [K8]	91.8	91.8	1	TRUE	A8JEV1	A8JEV1	photosynthetic electron transport chain [GO:0009767]	chloroplast [GO:0009507]; extrinsic component of membrane [GO:0019898]; photosystem II oxygen evolving complex [GO:0009654]	calcium ion binding [GO:0005509]; electron transporter, transferring electrons within the cyclic electron transport pathway of photosynthesis activity [GO:0045156]	photosynthetic electron transport chain [GO:0009767]	chloroplast [GO:0009507]; extrinsic component of membrane [GO:0019898]; photosystem II oxygen evolving complex [GO:0009654]	calcium ion binding [GO:0005509]; electron transporter, transferring electrons within the cyclic electron transport pathway of photosynthesis activity [GO:0045156]	20210409_ALS_XL_F62.raw	27350
Intra	Cre01.g033550.t1.2	Cre01.g033550.t1.2	Protein disulfide isomerase	Protein disulfide isomerase	223	216	ARLEKLLAGGSVNAAK	1×DSSO [K5]	GSEYLTKEK	1×DSSO [K7]	91.44	57.74	2	TRUE	A8HQT1	A8HQT1	NA	endoplasmic reticulum [GO:0005783]	protein disulfide isomerase activity [GO:0003756]	NA	endoplasmic reticulum [GO:0005783]	protein disulfide isomerase activity [GO:0003756]	20210409_ALS_XL_F54.raw	24958
Intra	Cre17.g724300.t1.2	Cre17.g724300.t1.2	Photosystem I reaction center subunit K	Photosystem I reaction center subunit K	66	58	NTTAGLKLVDSK	1×DSSO [K7]	FGLAPTVKK	1×DSSO [K8]	91.44	55.24	2	TRUE	A8J6K8	A8J6K8	photosynthesis [GO:0015979]	chloroplast [GO:0009507]; integral component of membrane [GO:0016021]; photosystem I [GO:0009522]	NA	photosynthesis [GO:0015979]	chloroplast [GO:0009507]; integral component of membrane [GO:0016021]; photosystem I [GO:0009522]	NA	20210409_ALS_XL_F54.raw	29690
Intra	Cre13.g567950.t1.2	Cre13.g567950.t1.2	ADP-glucose pyrophosphorylase large subunit	ADP-glucose pyrophosphorylase large subunit	260	241	VTSFAEKPK	1×DSSO [K7]	AKEFGLMK	1×Oxidation [M7]; 1×DSSO [K2]	91.26	57.18	2	TRUE	A0A2K3CZF3	A0A2K3CZF3	glycogen biosynthetic process [GO:0005978]; starch biosynthetic process [GO:0019252]	chloroplast [GO:0009507]	ATP binding [GO:0005524]; glucose-1-phosphate adenylyltransferase activity [GO:0008878]	glycogen biosynthetic process [GO:0005978]; starch biosynthetic process [GO:0019252]	chloroplast [GO:0009507]	ATP binding [GO:0005524]; glucose-1-phosphate adenylyltransferase activity [GO:0008878]	20210409_ALS_XL_F55.raw	22479
Inter	Cre11.g467578.t1.1	Cre12.g537800.t1.2	Ribosomal L28e protein family	Cytosolic 80S ribosomal protein L7	104	1	QVSSYRPDLKAAAQAR	1×DSSO [K10]	STVVPELLAK	1×DSSO [S1]	91.14	43.82	2	TRUE	A0A2K3D7C4	A0A2K3D598	translation [GO:0006412]	cytosolic large ribosomal subunit [GO:0022625]	structural constituent of ribosome [GO:0003735]	maturation of LSU-rRNA from tricistronic rRNA transcript (SSU-rRNA, 5.8S rRNA, LSU-rRNA) [GO:0000463]	cytosolic large ribosomal subunit [GO:0022625]	RNA binding [GO:0003723]; structural constituent of ribosome [GO:0003735]	20210409_ALS_XL_F51.raw	36285
Intra	Cre09.g387726.t1.1	Cre09.g387726.t1.1	Aspartate aminotransferase	Aspartate aminotransferase	66	52	TEEGKPYVLR	1×DSSO [K5]	KLNLGVGAYR	1×DSSO [K1]	91.14	47	2	TRUE	A8J129	A8J129	biosynthetic process [GO:0009058]; cellular amino acid metabolic process [GO:0006520]	mitochondrion [GO:0005739]	L-aspartate:2-oxoglutarate aminotransferase activity [GO:0004069]; pyridoxal phosphate binding [GO:0030170]	biosynthetic process [GO:0009058]; cellular amino acid metabolic process [GO:0006520]	mitochondrion [GO:0005739]	L-aspartate:2-oxoglutarate aminotransferase activity [GO:0004069]; pyridoxal phosphate binding [GO:0030170]	20210409_ALS_XL_F56.raw	31632
Intra	Cre16.g688050.t1.1	Cre16.g688050.t1.1	eukaryotic translation initiation factor 4B1	eukaryotic translation initiation factor 4B1	440	357	KEGGGEGGKDGPR	1×DSSO [K1]	GVDPIKEALR	1×DSSO [K6]	91.14	54.58	1	TRUE	A0A2K3CUK8	A0A2K3CUK8	NA	NA	mRNA binding [GO:0003729]; translation initiation factor activity [GO:0003743]	NA	NA	mRNA binding [GO:0003729]; translation initiation factor activity [GO:0003743]	20210409_ALS_XL_F59.raw	20887
Intra	Cre01.g055453.t1.1	Cre01.g055453.t1.1	Acetolactate synthase, small subunit	Acetolactate synthase, small subunit	255	266	SAGIPEQIAVPLPEAAKVK	1×DSSO [K17]	AASSNGAPKAAAAGEER	1×DSSO [K9]	91.14	67.39	2	TRUE	A0A2K3E8D8	A0A2K3E8D8	isoleucine biosynthetic process [GO:0009097]; valine biosynthetic process [GO:0009099]	cytosol [GO:0005829]	acetolactate synthase activity [GO:0003984]; acetolactate synthase regulator activity [GO:1990610]	isoleucine biosynthetic process [GO:0009097]; valine biosynthetic process [GO:0009099]	cytosol [GO:0005829]	acetolactate synthase activity [GO:0003984]; acetolactate synthase regulator activity [GO:1990610]	20210409_ALS_XL_F45.raw	31615
Inter	Cre06.g306300.t1.2	Cre06.g275400.t1.1	Magnesium chelatase subunit I, isoform 1	(1 of 1) PTHR10331 - T COMPLEX PROTEIN 10	207	552	AFEPGLLAKANR	1×DSSO [K9]	TELEKAANR	1×DSSO [K5]	91.09	60.53	1	TRUE	A8IMZ5	A0A2K3DNN4	chlorophyll biosynthetic process [GO:0015995]; photosynthesis [GO:0015979]	chloroplast stroma [GO:0009570]	ATP binding [GO:0005524]; magnesium chelatase activity [GO:0016851]	cilium assembly [GO:0060271]	centriole [GO:0005814]; nucleus [GO:0005634]	tubulin binding [GO:0015631]	20210409_ALS_XL_F55.raw	27452
Intra	Cre09.g397200.t1.2	Cre09.g397200.t1.2	T-complex protein 1, zeta subunit	T-complex protein 1, zeta subunit	288	295	VHKIIELKK	1×DSSO [K3]	KICTEENGK	1×Carbamidomethyl [C3]; 1×DSSO [K1]	91.09	48.03	1	TRUE	A0A2K3DD34	A0A2K3DD34	protein folding [GO:0006457]	chaperonin-containing T-complex [GO:0005832]	ATPase activity [GO:0016887]; ATP binding [GO:0005524]; unfolded protein binding [GO:0051082]	protein folding [GO:0006457]	chaperonin-containing T-complex [GO:0005832]	ATPase activity [GO:0016887]; ATP binding [GO:0005524]; unfolded protein binding [GO:0051082]	20210409_ALS_XL_F64.raw	17576
Inter	Cre12.g510800.t1.2	Cre09.g408350.t1.2	Magnesium chelatase subunit I, isoform 2	(1 of 10) 3.4.21.72 - IgA-specific serine endopeptidase / Immunoglobulin A1 protease	406	156	AEGKADRPTGAK	1×DSSO [K4]	AEAAEAKRK	1×DSSO [K7]	91.09	25.2	1	TRUE	A8IKQ6	A0A2K3DFG4	chlorophyll biosynthetic process [GO:0015995]; photosynthesis [GO:0015979]	chloroplast stroma [GO:0009570]	ATP binding [GO:0005524]; magnesium chelatase activity [GO:0016851]	NA	NA	peptidase activity [GO:0008233]	20210409_ALS_XL_F65.raw	5292
Intra	Cre09.g396213.t1.1	Cre09.g396213.t1.1	Photosystem II Oxygen Evolution Enhancer protein 1	Photosystem II Oxygen Evolution Enhancer protein 1	231	238	GGSTGYDNAVALPARADAEELLKENVK	1×DSSO [K23]	ITKALK	1×DSSO [K3]	91	28.8	5	TRUE	A8J0E4	A8J0E4	photosystem II assembly [GO:0010207]; photosystem II stabilization [GO:0042549]	photosystem II oxygen evolving complex [GO:0009654]	oxygen evolving activity [GO:0010242]	photosystem II assembly [GO:0010207]; photosystem II stabilization [GO:0042549]	photosystem II oxygen evolving complex [GO:0009654]	oxygen evolving activity [GO:0010242]	20210409_ALS_XL_F55.raw	28077
Intra	Cre04.g222700.t1.2	Cre04.g222700.t1.2	Elongation Factor 3 and ABC transporter	Elongation Factor 3 and ABC transporter	802	816	LTEEEQKKLQENK	1×DSSO [K7]	VQIGDDPKVKR	1×DSSO [K8]	90.99	90.99	1	TRUE	A8ISZ1	A8ISZ1	NA	NA	ATPase activity [GO:0016887]; ATP binding [GO:0005524]; translation elongation factor activity [GO:0003746]	NA	NA	ATPase activity [GO:0016887]; ATP binding [GO:0005524]; translation elongation factor activity [GO:0003746]	20210409_ALS_XL_F62.raw	16117
Inter	Cre11.g467578.t1.1	Cre12.g537800.t1.2	Ribosomal L28e protein family	Cytosolic 80S ribosomal protein L7	48	1	YSGLVNAKTVDVAADGEAVK	1×DSSO [K8]	STVVPELLAK	1×DSSO [S1]	90.98	52.27	6	TRUE	A0A2K3D7C4	A0A2K3D598	translation [GO:0006412]	cytosolic large ribosomal subunit [GO:0022625]	structural constituent of ribosome [GO:0003735]	maturation of LSU-rRNA from tricistronic rRNA transcript (SSU-rRNA, 5.8S rRNA, LSU-rRNA) [GO:0000463]	cytosolic large ribosomal subunit [GO:0022625]	RNA binding [GO:0003723]; structural constituent of ribosome [GO:0003735]	20210409_ALS_XL_F33.raw	40140
Intra	gi|41179046|ref|NP_958402.1|	gi|41179046|ref|NP_958402.1|	ribosomal protein S3 (chloroplast)	ribosomal protein S3 (chloroplast)	1337	773	ASTVADSIVDALEKR	1×DSSO [K14]	ESALATKQSK	1×DSSO [K7]	90.98	51.88	1	TRUE	Q08365	Q08365	translation [GO:0006412]	chloroplast [GO:0009507]; cytosolic small ribosomal subunit [GO:0022627]	RNA binding [GO:0003723]; structural constituent of ribosome [GO:0003735]	translation [GO:0006412]	chloroplast [GO:0009507]; cytosolic small ribosomal subunit [GO:0022627]	RNA binding [GO:0003723]; structural constituent of ribosome [GO:0003735]	20210409_ALS_XL_F53.raw	40265
Intra	Cre06.g249750.t1.1	Cre06.g249750.t1.1	(1 of 1) PF07382//PF13374 - Histone H1-like nucleoprotein HC2 (HC2) // Tetratricopeptide repeat (TPR_10)	(1 of 1) PF07382//PF13374 - Histone H1-like nucleoprotein HC2 (HC2) // Tetratricopeptide repeat (TPR_10)	326	336	ATAEKAAAEK	1×DSSO [K5]	AAADKVAAEK	1×DSSO [K5]	90.98	25.31	1	TRUE	A0A2K3DLW7	A0A2K3DLW7	chromosome condensation [GO:0030261]	NA	DNA binding [GO:0003677]	chromosome condensation [GO:0030261]	NA	DNA binding [GO:0003677]	20210409_ALS_XL_F54.raw	9733
Inter	Cre01.g027950.t1.2	Cre09.g412050.t1.1	Intraflagellar transport protein 74/72	(1 of 546) 2.7.11.1 - Non-specific serine/threonine protein kinase / Threonine-specific protein kinase	508	439	IDTLEDKIK	1×DSSO [K7]	KEVEPR	1×DSSO [K1]	90.94	23.18	1	TRUE	Q6RCE1	A0A2K3DFN9	intraciliary transport involved in cilium assembly [GO:0035735]	cilium [GO:0005929]; intraciliary transport particle B [GO:0030992]	beta-tubulin binding [GO:0048487]	NA	NA	NA	20210409_ALS_XL_F51.raw	42316
Inter	Cre12.g529400.t1.2	Cre03.g203450.t1.2	Cytosolic 80S ribosomal protein S27, isoform A	Cytosolic 80S ribosomal protein S21	1	74	VLSSDIDLLNPPAELEK	1×DSSO [V1]	KKQVEAEAH	1×DSSO [K1]	90.94	90.94	1	TRUE	A8J576	A8IXG3	ribosomal small subunit assembly [GO:0000028]; translation [GO:0006412]	cytosolic small ribosomal subunit [GO:0022627]	metal ion binding [GO:0046872]; RNA binding [GO:0003723]; structural constituent of ribosome [GO:0003735]	endonucleolytic cleavage in ITS1 to separate SSU-rRNA from 5.8S rRNA and LSU-rRNA from tricistronic rRNA transcript (SSU-rRNA, 5.8S rRNA, LSU-rRNA) [GO:0000447]; endonucleolytic cleavage to generate mature 3'-end of SSU-rRNA from (SSU-rRNA, 5.8S rRNA, LSU-rRNA) [GO:0000461]; translation [GO:0006412]	cytosolic small ribosomal subunit [GO:0022627]	structural constituent of ribosome [GO:0003735]	20210409_ALS_XL_F52.raw	40499
Intra	Cre12.g516200.t1.2	Cre12.g516200.t1.2	Ribosomal protein S5/Elongation Factor G/III/V family protein	Ribosomal protein S5/Elongation Factor G/III/V family protein	498	429	VAVEPKNASDLPK	1×DSSO [K6]	DLYNKSVQR	1×DSSO [K5]	90.94	54.05	1	TRUE	A8JHX9	A8JHX9	translational elongation [GO:0006414]	ribonucleoprotein complex [GO:1990904]	GTPase activity [GO:0003924]; GTP binding [GO:0005525]; ribosome binding [GO:0043022]; translation elongation factor activity [GO:0003746]	translational elongation [GO:0006414]	ribonucleoprotein complex [GO:1990904]	GTPase activity [GO:0003924]; GTP binding [GO:0005525]; ribosome binding [GO:0043022]; translation elongation factor activity [GO:0003746]	20210409_ALS_XL_F53.raw	25045
Intra	Cre15.g641000.t2.1	Cre15.g641000.t2.1	NUP50 (Nucleoporin 50 kDa) protein	NUP50 (Nucleoporin 50 kDa) protein	152	165	AAAAEGDKKAEAGAEK	1×DSSO [K8]	DGGKKEEAK	1×DSSO [K5]	90.94	47.86	1	FALSE	A0A2K3CWV4	A0A2K3CWV4	intracellular transport [GO:0046907]	NA	NA	intracellular transport [GO:0046907]	NA	NA	20210409_ALS_XL_F61.raw	5382
Intra	Cre06.g249750.t1.1	Cre06.g249750.t1.1	(1 of 1) PF07382//PF13374 - Histone H1-like nucleoprotein HC2 (HC2) // Tetratricopeptide repeat (TPR_10)	(1 of 1) PF07382//PF13374 - Histone H1-like nucleoprotein HC2 (HC2) // Tetratricopeptide repeat (TPR_10)	357	374	AATDKAAADKAAAEK	1×DSSO [K5]	GKATEQKSR	1×DSSO [K7]	90.94	90.94	1	TRUE	A0A2K3DLW7	A0A2K3DLW7	chromosome condensation [GO:0030261]	NA	DNA binding [GO:0003677]	chromosome condensation [GO:0030261]	NA	DNA binding [GO:0003677]	20210409_ALS_XL_F62.raw	7454
Intra	Cre10.g428050.t1.1	Cre10.g428050.t1.1	None	None	586	593	ETGAAEVTKEAAKR	1×DSSO [K9]	LKDAEAR	1×DSSO [K2]	90.54	90.54	1	TRUE	A0A2K3D9M9	A0A2K3D9M9	NA	NA	NA	NA	NA	NA	20210409_ALS_XL_F59.raw	13177
Intra	Cre16.g688050.t1.1	Cre16.g688050.t1.1	eukaryotic translation initiation factor 4B1	eukaryotic translation initiation factor 4B1	332	349	TAGAAGEEGGDRKGGANPFGAARPR	1×DSSO [K13]	EEVLKEK	1×DSSO [K5]	90.54	39.49	2	TRUE	A0A2K3CUK8	A0A2K3CUK8	NA	NA	mRNA binding [GO:0003729]; translation initiation factor activity [GO:0003743]	NA	NA	mRNA binding [GO:0003729]; translation initiation factor activity [GO:0003743]	20210409_ALS_XL_F60.raw	19207
Intra	Cre16.g688050.t1.1	Cre16.g688050.t1.1	eukaryotic translation initiation factor 4B1	eukaryotic translation initiation factor 4B1	440	349	KEGGGEGGKDGPR	1×DSSO [K1]	EEVLKEK	1×DSSO [K5]	90.54	43.14	1	TRUE	A0A2K3CUK8	A0A2K3CUK8	NA	NA	mRNA binding [GO:0003729]; translation initiation factor activity [GO:0003743]	NA	NA	mRNA binding [GO:0003729]; translation initiation factor activity [GO:0003743]	20210409_ALS_XL_F60.raw	8530
Intra	Cre09.g410600.t1.1	Cre09.g410600.t1.1	Phosphoprotein phosphatase 2C-related	Phosphoprotein phosphatase 2C-related	86	281	FEEFGKGSVEDSLVK	1×DSSO [K6]	KIALSPEDR	1×DSSO [K1]	90.29	51.27	1	TRUE	A8J4N7	A8J4N7	protein dephosphorylation [GO:0006470]	NA	magnesium-dependent protein serine/threonine phosphatase activity [GO:0004724]; metal ion binding [GO:0046872]; protein serine phosphatase activity [GO:0106306]; protein threonine phosphatase activity [GO:0106307]	protein dephosphorylation [GO:0006470]	NA	magnesium-dependent protein serine/threonine phosphatase activity [GO:0004724]; metal ion binding [GO:0046872]; protein serine phosphatase activity [GO:0106306]; protein threonine phosphatase activity [GO:0106307]	20210409_ALS_XL_F54.raw	33703
Intra	Cre09.g415800.t1.2	Cre09.g415800.t1.2	MA3 domain-containing protein	MA3 domain-containing protein	47	67	AAANHKAAAASGER	1×DSSO [K6]	SAKGPGGAKK	1×DSSO [K9]	89.7	36.24	2	TRUE	A0A2K3DG12	A0A2K3DG12	negative regulation of transcription, DNA-templated [GO:0045892]	cytoplasm [GO:0005737]	NA	negative regulation of transcription, DNA-templated [GO:0045892]	cytoplasm [GO:0005737]	NA	20210409_ALS_XL_F63.raw	4721
Inter	Cre03.g194400.t1.2	Cre13.g564250.t1.2	Eukaryotic translation initiation factor 3, subunit I	Eukaryotic translation initiation factor 3, subunit A	160	840	KLITSHDGGILR	1×DSSO [K1]	KLDEALAK	1×DSSO [K1]	89.38	18.89	2	TRUE	A8IWL4	A0A2K3CZ51	cytoplasmic translational initiation [GO:0002183]; formation of cytoplasmic translation initiation complex [GO:0001732]	eukaryotic 43S preinitiation complex [GO:0016282]; eukaryotic 48S preinitiation complex [GO:0033290]; eukaryotic translation initiation factor 3 complex, eIF3m [GO:0071541]	RNA binding [GO:0003723]; translation initiation factor activity [GO:0003743]	formation of cytoplasmic translation initiation complex [GO:0001732]; translation reinitiation [GO:0002188]	eukaryotic 43S preinitiation complex [GO:0016282]; eukaryotic 48S preinitiation complex [GO:0033290]; eukaryotic translation initiation factor 3 complex, eIF3e [GO:0071540]; eukaryotic translation initiation factor 3 complex, eIF3m [GO:0071541]; multi-eIF complex [GO:0043614]	mRNA binding [GO:0003729]; translation initiation factor activity [GO:0003743]	20210409_ALS_XL_F58.raw	24834
Intra	Cre09.g393358.t1.1	Cre09.g393358.t1.1	Hyaluronan / mRNA binding family	Hyaluronan / mRNA binding family	268	252	EAAAASKAKPVIETGFR	1×DSSO [K7]	KKAEAER	1×DSSO [K1]	89.33	89.33	2	FALSE	A8J087	A8J087	NA	cytoplasm [GO:0005737]; nucleus [GO:0005634]	RNA binding [GO:0003723]	NA	cytoplasm [GO:0005737]; nucleus [GO:0005634]	RNA binding [GO:0003723]	20210409_ALS_XL_F62.raw	18646
Intra	Cre11.g478800.t1.2	Cre11.g478800.t1.2	None	None	455	466	AEYKEKQEAAK	1×DSSO [K6]	RAPPPKPAAK	1×DSSO [K6]	89.3	89.3	1	TRUE	A0A2K3D8I4	A0A2K3D8I4	intracellular mRNA localization [GO:0008298]	endoplasmic reticulum [GO:0005783]; nuclear outer membrane-endoplasmic reticulum membrane network [GO:0042175]; ribonucleoprotein complex [GO:1990904]	NA	intracellular mRNA localization [GO:0008298]	endoplasmic reticulum [GO:0005783]; nuclear outer membrane-endoplasmic reticulum membrane network [GO:0042175]; ribonucleoprotein complex [GO:1990904]	NA	20210409_ALS_XL_F63.raw	8973
Intra	Cre16.g688050.t1.1	Cre16.g688050.t1.1	eukaryotic translation initiation factor 4B1	eukaryotic translation initiation factor 4B1	440	430	KEGGGEGGKDGPR	1×DSSO [K1]	LQVEEDDKVR	1×DSSO [K8]	89.23	55.06	2	TRUE	A0A2K3CUK8	A0A2K3CUK8	NA	NA	mRNA binding [GO:0003729]; translation initiation factor activity [GO:0003743]	NA	NA	mRNA binding [GO:0003729]; translation initiation factor activity [GO:0003743]	20210409_ALS_XL_F59.raw	12201
Intra	Cre01.g008500.t1.2	Cre01.g008500.t1.2	ankyrin repeat family protein	ankyrin repeat family protein	8	14	PAADFVKEIQAR	1×DSSO [K7]	KLKPVQDR	1×DSSO [K1]	89.08	89.08	1	TRUE	A0A2K3E5B2	A0A2K3E5B2	regulation of gene expression [GO:0010468]	nucleus [GO:0005634]	NA	regulation of gene expression [GO:0010468]	nucleus [GO:0005634]	NA	20210409_ALS_XL_F59.raw	25783
Intra	Cre10.g458550.t1.2	Cre10.g458550.t1.2	Uncharacterised BCR, YbaB family COG0718	Uncharacterised BCR, YbaB family COG0718	130	137	TTDAMRDAHKK	1×DSSO [K10]; 1×Oxidation [M5]	SVTGMKEK	1×DSSO [K6]; 1×Oxidation [M5]	89.08	51.25	4	TRUE	Q84X70	Q84X70	NA	NA	DNA binding [GO:0003677]	NA	NA	DNA binding [GO:0003677]	20210409_ALS_XL_F64.raw	5226
Intra	Cre05.g233050.t1.2	Cre05.g233050.t1.2	Flagellar Associated Protein 162	Flagellar Associated Protein 162	5	9	SDVKAAK	1×Acetyl [S1]; 1×DSSO [K4]	KEGGK	1×DSSO [K1]	89.05	17.19	10	TRUE	A8JG73	A8JG73	NA	motile cilium [GO:0031514]	NA	NA	motile cilium [GO:0031514]	NA	20210409_ALS_XL_F45.raw	5190
Intra	Cre02.g081250.t1.2	Cre02.g081250.t1.2	plastid transcriptionally active 16	plastid transcriptionally active 16	529	458	KEEPKEEEEAPAPK	1×DSSO [K5]	KEAPK	1×DSSO [K1]	89.05	70.78	1	FALSE	A0A2K3E0L8	A0A2K3E0L8	NA	NA	NA	NA	NA	NA	20210409_ALS_XL_F58.raw	8605
Intra	Cre06.g306300.t1.2	Cre06.g306300.t1.2	Magnesium chelatase subunit I, isoform 1	Magnesium chelatase subunit I, isoform 1	394	284	KDPLAEIDDGDRVR	1×DSSO [K1]	FGMHAQIGTVKDPR	1×Oxidation [M3]; 1×DSSO [K11]	88.95	56.74	2	TRUE	A8IMZ5	A8IMZ5	chlorophyll biosynthetic process [GO:0015995]; photosynthesis [GO:0015979]	chloroplast stroma [GO:0009570]	ATP binding [GO:0005524]; magnesium chelatase activity [GO:0016851]	chlorophyll biosynthetic process [GO:0015995]; photosynthesis [GO:0015979]	chloroplast stroma [GO:0009570]	ATP binding [GO:0005524]; magnesium chelatase activity [GO:0016851]	20210409_ALS_XL_F61.raw	29160
Inter	Cre06.g306300.t1.2	Cre11.g477733.t1.2	Magnesium chelatase subunit I, isoform 1	None	198	19	ALTEGVKAFEPGLLAK	1×DSSO [K7]	RAEEVKAAEGR	1×DSSO [K6]	88.64	59.47	1	TRUE	A8IMZ5	A0A2K3D8F6	chlorophyll biosynthetic process [GO:0015995]; photosynthesis [GO:0015979]	chloroplast stroma [GO:0009570]	ATP binding [GO:0005524]; magnesium chelatase activity [GO:0016851]	NA	NA	NA	20210409_ALS_XL_F33.raw	38675
Intra	Cre12.g513950.t1.2	Cre12.g513950.t1.2	Iron-sulfur cluster assembly protein	Iron-sulfur cluster assembly protein	57	73	TVKEVATPSSLAALR	1×DSSO [K3]	EQSKSALATLR	1×DSSO [K4]	88.64	43.95	1	TRUE	A8JHB2	A8JHB2	iron-sulfur cluster assembly [GO:0016226]	NA	NA	iron-sulfur cluster assembly [GO:0016226]	NA	NA	20210409_ALS_XL_F52.raw	34886
Intra	Cre13.g568650.t1.2	Cre13.g568650.t1.2	Cytosolic 80S ribosomal protein S3a	Cytosolic 80S ribosomal protein S3a	222	62	VLKAPKFDITK	1×DSSO [K6]	IASEALKGR	1×DSSO [K7]	88.58	88.58	3	TRUE	A8HS48	A8HS48	translation [GO:0006412]	cytosol [GO:0005829]; cytosolic small ribosomal subunit [GO:0022627]	structural constituent of ribosome [GO:0003735]	translation [GO:0006412]	cytosol [GO:0005829]; cytosolic small ribosomal subunit [GO:0022627]	structural constituent of ribosome [GO:0003735]	20210409_ALS_XL_F58.raw	26390
Intra	Cre12.g512000.t1.1	Cre12.g512000.t1.1	(1 of 4) K06816 - golgi apparatus protein 1 (GLG1, ESL1)	(1 of 4) K06816 - golgi apparatus protein 1 (GLG1, ESL1)	80	68	DANAGSAAIAKAAAAAAK	1×DSSO [K11]	AAATTVKK	1×DSSO [K7]	88.45	47.22	1	TRUE	A0A2K3D2H8	A0A2K3D2H8	NA	Golgi membrane [GO:0000139]; integral component of membrane [GO:0016021]	NA	NA	Golgi membrane [GO:0000139]; integral component of membrane [GO:0016021]	NA	20210409_ALS_XL_F50.raw	26179
Intra	Cre09.g410300.t1.1	Cre09.g410300.t1.1	(1 of 1) 1.4.3.2 - L-amino-acid oxidase / Ophio-amino-acid oxidase	(1 of 1) 1.4.3.2 - L-amino-acid oxidase / Ophio-amino-acid oxidase	1190	1182	AAKEAAAGAK	1×DSSO [K3]	DAKAAATK	1×DSSO [K3]	88.45	17.1	1	TRUE	A0A2K3DFK4	A0A2K3DFK4	NA	NA	oxidoreductase activity [GO:0016491]	NA	NA	oxidoreductase activity [GO:0016491]	20210409_ALS_XL_F54.raw	6067
Intra	Cre09.g396213.t1.1	Cre09.g396213.t1.1	Photosystem II Oxygen Evolution Enhancer protein 1	Photosystem II Oxygen Evolution Enhancer protein 1	241	235	ALKGSAVFSVAK	1×DSSO [K3]	ENVKITK	1×DSSO [K4]	87.85	45.95	1	TRUE	A8J0E4	A8J0E4	photosystem II assembly [GO:0010207]; photosystem II stabilization [GO:0042549]	photosystem II oxygen evolving complex [GO:0009654]	oxygen evolving activity [GO:0010242]	photosystem II assembly [GO:0010207]; photosystem II stabilization [GO:0042549]	photosystem II oxygen evolving complex [GO:0009654]	oxygen evolving activity [GO:0010242]	20210409_ALS_XL_F54.raw	24622
Intra	Cre06.g278238.t1.1	Cre06.g278238.t1.1	Uncharacterised protein family SERF	Uncharacterised protein family SERF	41	50	ERDAKALAEK	1×DSSO [K5]	IAKKEGAGAK	1×DSSO [K4]	87.85	19.99	2	TRUE	A8J8W7	A8J8W7	NA	NA	NA	NA	NA	NA	20210409_ALS_XL_F61.raw	7807
Intra	Cre14.g617900.t1.2	Cre14.g617900.t1.2	Cytosolic 80S ribosomal protein L35	Cytosolic 80S ribosomal protein L35	46	5	VTGGAPNKLSKIK	1×DSSO [K11]	VKMHELR	1×Oxidation [M3]; 1×DSSO [K2]	87.85	87.85	1	TRUE	A8HNX3	A8HNX3	maturation of LSU-rRNA from tricistronic rRNA transcript (SSU-rRNA, 5.8S rRNA, LSU-rRNA) [GO:0000463]; translation [GO:0006412]	cytosolic large ribosomal subunit [GO:0022625]	mRNA binding [GO:0003729]; structural constituent of ribosome [GO:0003735]	maturation of LSU-rRNA from tricistronic rRNA transcript (SSU-rRNA, 5.8S rRNA, LSU-rRNA) [GO:0000463]; translation [GO:0006412]	cytosolic large ribosomal subunit [GO:0022625]	mRNA binding [GO:0003729]; structural constituent of ribosome [GO:0003735]	20210409_ALS_XL_F63.raw	14029
Intra	Cre08.g372450.t1.2	Cre08.g372450.t1.2	Photosystem II Oxygen Evolution Enhancer protein 3	Photosystem II Oxygen Evolution Enhancer protein 3	99	102	ASLDETKKR	1×DSSO [K8]	VKESEAR	1×DSSO [K2]	87.76	46.84	2	TRUE	A8JEV1	A8JEV1	photosynthetic electron transport chain [GO:0009767]	chloroplast [GO:0009507]; extrinsic component of membrane [GO:0019898]; photosystem II oxygen evolving complex [GO:0009654]	calcium ion binding [GO:0005509]; electron transporter, transferring electrons within the cyclic electron transport pathway of photosynthesis activity [GO:0045156]	photosynthetic electron transport chain [GO:0009767]	chloroplast [GO:0009507]; extrinsic component of membrane [GO:0019898]; photosystem II oxygen evolving complex [GO:0009654]	calcium ion binding [GO:0005509]; electron transporter, transferring electrons within the cyclic electron transport pathway of photosynthesis activity [GO:0045156]	20210409_ALS_XL_F60.raw	7580
Intra	Cre12.g516200.t1.2	Cre12.g516200.t1.2	Ribosomal protein S5/Elongation Factor G/III/V family protein	Ribosomal protein S5/Elongation Factor G/III/V family protein	423	429	VRIMGANYIPGEKK	1×Oxidation [M4]; 1×DSSO [K13]	DLYNKSVQR	1×DSSO [K5]	87.63	47.52	9	TRUE	A8JHX9	A8JHX9	translational elongation [GO:0006414]	ribonucleoprotein complex [GO:1990904]	GTPase activity [GO:0003924]; GTP binding [GO:0005525]; ribosome binding [GO:0043022]; translation elongation factor activity [GO:0003746]	translational elongation [GO:0006414]	ribonucleoprotein complex [GO:1990904]	GTPase activity [GO:0003924]; GTP binding [GO:0005525]; ribosome binding [GO:0043022]; translation elongation factor activity [GO:0003746]	20210409_ALS_XL_F55.raw	27562
Intra	Cre12.g510650.t1.2	Cre12.g510650.t1.2	Fructose-1,6-bisphosphatase	Fructose-1,6-bisphosphatase	413	390	EVEYLESFTKKH	1×DSSO [K10]	VLDVNPEKVHQR	1×DSSO [K8]	87.28	87.28	2	TRUE	A8IKQ0	A8IKQ0	fructose 1,6-bisphosphate metabolic process [GO:0030388]; fructose 6-phosphate metabolic process [GO:0006002]; fructose metabolic process [GO:0006000]; gluconeogenesis [GO:0006094]; photosynthetic electron transport in photosystem I [GO:0009773]; response to cold [GO:0009409]; sucrose biosynthetic process [GO:0005986]	apoplast [GO:0048046]; chloroplast stroma [GO:0009570]; cytoplasm [GO:0005737]; cytosol [GO:0005829]; stromule [GO:0010319]	fructose 1,6-bisphosphate 1-phosphatase activity [GO:0042132]; metal ion binding [GO:0046872]	fructose 1,6-bisphosphate metabolic process [GO:0030388]; fructose 6-phosphate metabolic process [GO:0006002]; fructose metabolic process [GO:0006000]; gluconeogenesis [GO:0006094]; photosynthetic electron transport in photosystem I [GO:0009773]; response to cold [GO:0009409]; sucrose biosynthetic process [GO:0005986]	apoplast [GO:0048046]; chloroplast stroma [GO:0009570]; cytoplasm [GO:0005737]; cytosol [GO:0005829]; stromule [GO:0010319]	fructose 1,6-bisphosphate 1-phosphatase activity [GO:0042132]; metal ion binding [GO:0046872]	20210409_ALS_XL_F61.raw	30887
Intra	Cre12.g529950.t1.2	Cre12.g529950.t1.2	Eukaryotic translation initiation factor 4, gamma subunit	Eukaryotic translation initiation factor 4, gamma subunit	281	315	LHNDKNNGISTR	1×DSSO [K5]	KLDDVR	1×DSSO [K1]	87.26	41.2	1	TRUE	A0A2K3D4R1	A0A2K3D4R1	NA	eukaryotic translation initiation factor 4F complex [GO:0016281]	mRNA binding [GO:0003729]; translation initiation factor activity [GO:0003743]	NA	eukaryotic translation initiation factor 4F complex [GO:0016281]	mRNA binding [GO:0003729]; translation initiation factor activity [GO:0003743]	20210409_ALS_XL_F62.raw	13598
Inter	Cre12.g514850.t1.2	Cre17.g703400.t1.1	Heat shock protein 90C	(1 of 3) PTHR11207//PTHR11207:SF7 - RIBONUCLEASE III // SUBFAMILY NOT NAMED	712	105	TLLKEKDEDR	1×DSSO [K6]	KALADR	1×DSSO [K1]	87.26	87.26	1	TRUE	Q66T67	A0A2K3CP42	protein folding [GO:0006457]	endoplasmic reticulum [GO:0005783]; perinuclear region of cytoplasm [GO:0048471]	ATPase activity [GO:0016887]; ATP binding [GO:0005524]; unfolded protein binding [GO:0051082]	pre-miRNA processing [GO:0031054]; primary miRNA processing [GO:0031053]; production of siRNA involved in RNA interference [GO:0030422]; RNA processing [GO:0006396]	integral component of membrane [GO:0016021]; nucleus [GO:0005634]	double-stranded RNA binding [GO:0003725]; ribonuclease III activity [GO:0004525]	20210409_ALS_XL_F62.raw	15910
Intra	Cre09.g386750.t1.2	Cre09.g386750.t1.2	Heat shock protein 90A	Heat shock protein 90A	451	431	SGEETTSLKDYVTR	1×DSSO [K9]	AKLADLLR	1×DSSO [K2]	92.08	122.43	2	TRUE	A8J1U1	A8J1U1	cellular response to heat [GO:0034605]; protein folding [GO:0006457]; protein stabilization [GO:0050821]	cytosol [GO:0005829]; perinuclear region of cytoplasm [GO:0048471]; plasma membrane [GO:0005886]; protein-containing complex [GO:0032991]	ATPase activity [GO:0016887]; ATP binding [GO:0005524]; unfolded protein binding [GO:0051082]	cellular response to heat [GO:0034605]; protein folding [GO:0006457]; protein stabilization [GO:0050821]	cytosol [GO:0005829]; perinuclear region of cytoplasm [GO:0048471]; plasma membrane [GO:0005886]; protein-containing complex [GO:0032991]	ATPase activity [GO:0016887]; ATP binding [GO:0005524]; unfolded protein binding [GO:0051082]	20210409_ALS_XL_F55.raw	38455
Intra	Cre16.g671750.t1.1	Cre16.g671750.t1.1	Prefoldin beta-like protein	Prefoldin beta-like protein	27	34	LHMKMQELER	2×Oxidation [M3; M5]; 1×DSSO [K4]	KLASEK	1×DSSO [K1]	87.12	28.96	2	TRUE	A0A2K3CVP3	A0A2K3CVP3	protein folding [GO:0006457]	cytoplasm [GO:0005737]; prefoldin complex [GO:0016272]	unfolded protein binding [GO:0051082]	protein folding [GO:0006457]	cytoplasm [GO:0005737]; prefoldin complex [GO:0016272]	unfolded protein binding [GO:0051082]	20210409_ALS_XL_F61.raw	10266
Intra	Cre12.g498450.t1.2	Cre12.g498450.t1.2	Regulator of chromosome condensation (RCC1) family protein	Regulator of chromosome condensation (RCC1) family protein	14	8	AKAKEEAADKPVEEPKPK	1×DSSO [K2]	AKPATK	1×DSSO [K2]	87.12	37.91	1	TRUE	A8JGJ7	A8JGJ7	Ran protein signal transduction [GO:0031291]; regulation of mitotic spindle assembly [GO:1901673]	cytoplasm [GO:0005737]	chromatin binding [GO:0003682]	Ran protein signal transduction [GO:0031291]; regulation of mitotic spindle assembly [GO:1901673]	cytoplasm [GO:0005737]	chromatin binding [GO:0003682]	20210409_ALS_XL_F63.raw	6855
Intra	Cre12.g526800.t1.2	Cre12.g526800.t1.2	6-phosphogluconate dehydrogenase, decarboxylating	6-phosphogluconate dehydrogenase, decarboxylating	120	124	SYDKTEAAVKR	1×DSSO [K10]	AQKEGLGEK	1×DSSO [K3]	87.11	58.9	4	TRUE	A8J5F7	A8J5F7	D-gluconate catabolic process [GO:0046177]; pentose-phosphate shunt, oxidative branch [GO:0009051]	cytosol [GO:0005829]	NADP binding [GO:0050661]; phosphogluconate dehydrogenase (decarboxylating) activity [GO:0004616]	D-gluconate catabolic process [GO:0046177]; pentose-phosphate shunt, oxidative branch [GO:0009051]	cytosol [GO:0005829]	NADP binding [GO:0050661]; phosphogluconate dehydrogenase (decarboxylating) activity [GO:0004616]	20210409_ALS_XL_F59.raw	12615
Intra	Cre09.g393358.t1.1	Cre09.g393358.t1.1	Hyaluronan / mRNA binding family	Hyaluronan / mRNA binding family	41	29	EAPKEEAKPAKAPVAK	1×DSSO [K11]	APKPVKK	1×DSSO [K6]	86.63	76.04	2	TRUE	A8J087	A8J087	NA	cytoplasm [GO:0005737]; nucleus [GO:0005634]	RNA binding [GO:0003723]	NA	cytoplasm [GO:0005737]; nucleus [GO:0005634]	RNA binding [GO:0003723]	20210409_ALS_XL_F63.raw	8236
Intra	Cre11.g478800.t1.2	Cre11.g478800.t1.2	None	None	189	140	KYAEFDAR	1×DSSO [K1]	SIRDKNR	1×DSSO [K5]	86.63	22.97	2	TRUE	A0A2K3D8I4	A0A2K3D8I4	intracellular mRNA localization [GO:0008298]	endoplasmic reticulum [GO:0005783]; nuclear outer membrane-endoplasmic reticulum membrane network [GO:0042175]; ribonucleoprotein complex [GO:1990904]	NA	intracellular mRNA localization [GO:0008298]	endoplasmic reticulum [GO:0005783]; nuclear outer membrane-endoplasmic reticulum membrane network [GO:0042175]; ribonucleoprotein complex [GO:1990904]	NA	20210409_ALS_XL_F65.raw	15242
Intra	Cre06.g310700.t1.2	Cre06.g310700.t1.2	Ribosomal protein L36a	Ribosomal protein L36a	6	27	VNVPKTKR	1×DSSO [K5]	VTQYKTGK	1×DSSO [K5]	86.34	59.34	2	FALSE	A8IM74	A8IM74	translation [GO:0006412]	cytosolic large ribosomal subunit [GO:0022625]	structural constituent of ribosome [GO:0003735]	translation [GO:0006412]	cytosolic large ribosomal subunit [GO:0022625]	structural constituent of ribosome [GO:0003735]	20210409_ALS_XL_F59.raw	10331
Intra	Cre12.g493950.t1.2	Cre12.g493950.t1.2	Chloroplast ribosomal protein S13	Chloroplast ribosomal protein S13	121	118	LKDIGCYR	1×Carbamidomethyl [C6]; 1×DSSO [K2]	VVAQNIKR	1×DSSO [K7]	86.34	19.35	1	TRUE	A8JDP6	A8JDP6	translation [GO:0006412]	mitochondrion [GO:0005739]; small ribosomal subunit [GO:0015935]	RNA binding [GO:0003723]; structural constituent of ribosome [GO:0003735]	translation [GO:0006412]	mitochondrion [GO:0005739]; small ribosomal subunit [GO:0015935]	RNA binding [GO:0003723]; structural constituent of ribosome [GO:0003735]	20210409_ALS_XL_F56.raw	20040
Inter	Cre09.g391097.t2.1	Cre02.g074550.t1.2	Cytosolic 80S ribosomal protein L4	None	100	50	RAEKPEVR	1×DSSO [K4]	VELQKK	1×DSSO [K5]	86.34	27.68	2	FALSE	A8J1A3	A8I9X1	NA	ribosome [GO:0005840]	NA	NA	NA	NA	20210409_ALS_XL_F62.raw	12755
Intra	Cre16.g687294.t1.1	Cre16.g687294.t1.1	ferredoxin/thioredoxin reductase subunit A (variable subunit) 1	ferredoxin/thioredoxin reductase subunit A (variable subunit) 1	59	39	HHEGMDLKGMEGTVTK	2×Oxidation [M5; M10]; 1×DSSO [K8]	VKVIASVK	1×DSSO [K2]	86.34	56.59	3	TRUE	A8JA70	A8JA70	photosynthesis [GO:0015979]	NA	NA	photosynthesis [GO:0015979]	NA	NA	20210409_ALS_XL_F63.raw	18273
Inter	Cre02.g101350.t1.2	Cre06.g310700.t1.2	Cytosolic 80S ribosomal protein L10a	Ribosomal protein L36a	44	6	NYDPQKDKR	1×DSSO [K6]	VNVPKTK	1×DSSO [K5]	86.15	86.15	1	TRUE	A8I4T2	A8IM74	maturation of LSU-rRNA [GO:0000470]; translation [GO:0006412]	cytosolic large ribosomal subunit [GO:0022625]	RNA binding [GO:0003723]; structural constituent of ribosome [GO:0003735]	translation [GO:0006412]	cytosolic large ribosomal subunit [GO:0022625]	structural constituent of ribosome [GO:0003735]	20210409_ALS_XL_F61.raw	11938
Intra	Cre06.g278238.t1.1	Cre06.g278238.t1.1	Uncharacterised protein family SERF	Uncharacterised protein family SERF	41	49	ERDAKALAEK	1×DSSO [K5]	IAKKEGAGAK	1×DSSO [K3]	86.12	86.12	1	TRUE	A8J8W7	A8J8W7	NA	NA	NA	NA	NA	NA	20210409_ALS_XL_F65.raw	9677
Inter	Cre09.g394750.t1.2	gi|41179034|ref|NP_958390.1|	Chloroplast Ribosomal Protein S1	ribosomal protein S2 (chloroplast)	190	280	LKTPLEALRPGMKR	1×Oxidation [M12]; 1×DSSO [K13]	KFVDPK	1×DSSO [K1]	86.01	52.32	9	TRUE	Q70DX8	Q8HUH1	translation [GO:0006412]	chloroplast [GO:0009507]; cytosolic small ribosomal subunit [GO:0022627]	mRNA binding [GO:0003729]; structural constituent of ribosome [GO:0003735]	translation [GO:0006412]	chloroplast [GO:0009507]; mitochondrial small ribosomal subunit [GO:0005763]	structural constituent of ribosome [GO:0003735]	20210409_ALS_XL_F63.raw	26645
Intra	Cre04.g222700.t1.2	Cre04.g222700.t1.2	Elongation Factor 3 and ABC transporter	Elongation Factor 3 and ABC transporter	808	802	LQENKVQIGDDPK	1×DSSO [K5]	LTEEEQKK	1×DSSO [K7]	85.91	44.51	1	TRUE	A8ISZ1	A8ISZ1	NA	NA	ATPase activity [GO:0016887]; ATP binding [GO:0005524]; translation elongation factor activity [GO:0003746]	NA	NA	ATPase activity [GO:0016887]; ATP binding [GO:0005524]; translation elongation factor activity [GO:0003746]	20210409_ALS_XL_F54.raw	16311
Intra	Cre08.g372450.t1.2	Cre08.g372450.t1.2	Photosystem II Oxygen Evolution Enhancer protein 3	Photosystem II Oxygen Evolution Enhancer protein 3	98	102	ASLDETKKR	1×DSSO [K7]	RVKESEAR	1×DSSO [K3]	85.91	27.36	26	TRUE	A8JEV1	A8JEV1	photosynthetic electron transport chain [GO:0009767]	chloroplast [GO:0009507]; extrinsic component of membrane [GO:0019898]; photosystem II oxygen evolving complex [GO:0009654]	calcium ion binding [GO:0005509]; electron transporter, transferring electrons within the cyclic electron transport pathway of photosynthesis activity [GO:0045156]	photosynthetic electron transport chain [GO:0009767]	chloroplast [GO:0009507]; extrinsic component of membrane [GO:0019898]; photosystem II oxygen evolving complex [GO:0009654]	calcium ion binding [GO:0005509]; electron transporter, transferring electrons within the cyclic electron transport pathway of photosynthesis activity [GO:0045156]	20210409_ALS_XL_F56.raw	7840
Inter	Cre09.g397697.t1.1	Cre01.g040000.t1.2	Ribosomal protein L4	Cytosolic 80S ribosomal protein L26	166	131	TSKALEILKK	1×DSSO [K3]	AAEKGKGK	1×DSSO [K6]	85.91	25.41	1	TRUE	A8J0I0	A8HMG7	translation [GO:0006412]	cytosolic large ribosomal subunit [GO:0022625]	RNA binding [GO:0003723]; structural constituent of ribosome [GO:0003735]	cytoplasmic translation [GO:0002181]; ribosomal large subunit biogenesis [GO:0042273]	cytosolic large ribosomal subunit [GO:0022625]	RNA binding [GO:0003723]; structural constituent of ribosome [GO:0003735]	20210409_ALS_XL_F63.raw	15717
Intra	Cre12.g529651.t1.1	Cre12.g529651.t1.1	Cytosolic 80S ribosomal protein L7a	Cytosolic 80S ribosomal protein L7a	137	60	TATALALTAVKNEDQREFAK	1×DSSO [K11]	KKPVVVK	1×DSSO [K1]	85.64	118.06	4	TRUE	A0A2K3D4Q4	A0A2K3D4Q4	maturation of LSU-rRNA [GO:0000470]	cytosolic large ribosomal subunit [GO:0022625]	RNA binding [GO:0003723]	maturation of LSU-rRNA [GO:0000470]	cytosolic large ribosomal subunit [GO:0022625]	RNA binding [GO:0003723]	20210409_ALS_XL_F60.raw	28629
Intra	Cre01.g011000.t1.2	Cre01.g011000.t1.2	Cytosolic 80S ribosomal protein L6	Cytosolic 80S ribosomal protein L6	175	162	EFFDQSEAKK	1×DSSO [K9]	SSKKGEK	1×DSSO [K3]	85.64	85.64	1	TRUE	A8HP90	A8HP90	cytoplasmic translation [GO:0002181]; ribosomal large subunit assembly [GO:0000027]	cytosolic large ribosomal subunit [GO:0022625]	RNA binding [GO:0003723]; structural constituent of ribosome [GO:0003735]	cytoplasmic translation [GO:0002181]; ribosomal large subunit assembly [GO:0000027]	cytosolic large ribosomal subunit [GO:0022625]	RNA binding [GO:0003723]; structural constituent of ribosome [GO:0003735]	20210409_ALS_XL_F61.raw	13209
Intra	Cre09.g393358.t1.1	Cre09.g393358.t1.1	Hyaluronan / mRNA binding family	Hyaluronan / mRNA binding family	38	29	EAPKEEAKPAKAPVAK	1×DSSO [K8]	APKPVKK	1×DSSO [K6]	85.64	67.87	2	TRUE	A8J087	A8J087	NA	cytoplasm [GO:0005737]; nucleus [GO:0005634]	RNA binding [GO:0003723]	NA	cytoplasm [GO:0005737]; nucleus [GO:0005634]	RNA binding [GO:0003723]	20210409_ALS_XL_F64.raw	9350
Intra	Cre08.g358562.t1.1	Cre08.g358562.t1.1	Chaperonin 20	Chaperonin 20	80	124	SVKLSDKVIYSK	1×DSSO [K3]	IAQLKPLSDR	1×DSSO [K5]	85.52	85.52	1	TRUE	A0A2K3DG79	A0A2K3DG79	chaperone cofactor-dependent protein refolding [GO:0051085]	chloroplast [GO:0009507]; mitochondrial matrix [GO:0005759]; plastid [GO:0009536]	ATPase activity [GO:0016887]; ATP binding [GO:0005524]; chaperone binding [GO:0051087]; metal ion binding [GO:0046872]; unfolded protein binding [GO:0051082]	chaperone cofactor-dependent protein refolding [GO:0051085]	chloroplast [GO:0009507]; mitochondrial matrix [GO:0005759]; plastid [GO:0009536]	ATPase activity [GO:0016887]; ATP binding [GO:0005524]; chaperone binding [GO:0051087]; metal ion binding [GO:0046872]; unfolded protein binding [GO:0051082]	20210409_ALS_XL_F58.raw	27902
Intra	Cre16.g672300.t1.2	Cre16.g672300.t1.2	High mobility group protein	High mobility group protein	44	53	ATKPAKAEKAPK	1×DSSO [K6]	AEKAPK	1×DSSO [K3]	85.52	85.52	1	TRUE	A8J3F0	A8J3F0	NA	nucleus [GO:0005634]	DNA binding, bending [GO:0008301]	NA	nucleus [GO:0005634]	DNA binding, bending [GO:0008301]	20210409_ALS_XL_F62.raw	4910
Intra	Cre03.g194350.t1.2	Cre03.g194350.t1.2	proton pump interactor 1	proton pump interactor 1	522	530	MAEAEEKK	1×DSSO [K7]	AAEAKEK	1×DSSO [K5]	85.33	11.83	1	TRUE	A0A2K3DYI3	A0A2K3DYI3	NA	integral component of membrane [GO:0016021]	NA	NA	integral component of membrane [GO:0016021]	NA	20210409_ALS_XL_F56.raw	5656
Intra	Cre16.g680700.t1.2	Cre16.g680700.t1.2	Aluminium induced protein with YGL and LRDR motifs	Aluminium induced protein with YGL and LRDR motifs	251	261	TKEGAEGWR	1×DSSO [K2]	NVKAIPR	1×DSSO [K3]	85.31	33.5	1	TRUE	A8J3W1	A8J3W1	NA	NA	NA	NA	NA	NA	20210409_ALS_XL_F57.raw	18007
Intra	Cre12.g557600.t1.1	Cre12.g557600.t1.1	Adenylate kinase	Adenylate kinase	168	189	SYHVKFAPPK	1×DSSO [K5]	KDDNAETLK	1×DSSO [K1]	85.31	52.34	1	TRUE	A0A2K3D5Q3	A0A2K3D5Q3	NA	cytoplasm [GO:0005737]; mitochondrion [GO:0005739]	adenylate kinase activity [GO:0004017]; ATP binding [GO:0005524]	NA	cytoplasm [GO:0005737]; mitochondrion [GO:0005739]	adenylate kinase activity [GO:0004017]; ATP binding [GO:0005524]	20210409_ALS_XL_F59.raw	21288
Intra	Cre07.g326800.t1.1	Cre07.g326800.t1.1	Serine/threonine protein phosphatase 5-like, catalytic subunit	Serine/threonine protein phosphatase 5-like, catalytic subunit	43	100	AKEEANANFKAK	1×DSSO [K10]	YIKGYYR	1×DSSO [K3]	85.08	48.42	1	TRUE	A8IHM8	A8IHM8	NA	chloroplast [GO:0009507]; cytosol [GO:0005829]; nucleus [GO:0005634]	metal ion binding [GO:0046872]; protein serine/threonine phosphatase activity [GO:0004722]; protein serine phosphatase activity [GO:0106306]; protein threonine phosphatase activity [GO:0106307]	NA	chloroplast [GO:0009507]; cytosol [GO:0005829]; nucleus [GO:0005634]	metal ion binding [GO:0046872]; protein serine/threonine phosphatase activity [GO:0004722]; protein serine phosphatase activity [GO:0106306]; protein threonine phosphatase activity [GO:0106307]	20210409_ALS_XL_F61.raw	18509
Intra	Cre07.g356600.t1.2	Cre07.g356600.t1.2	(1 of 1) PTHR13096 - MINA53 MYC INDUCED NUCLEAR ANTIGEN	(1 of 1) PTHR13096 - MINA53 MYC INDUCED NUCLEAR ANTIGEN	706	717	TKEEEPAKK	1×DSSO [K8]	KEAAPK	1×DSSO [K1]	85.06	13.31	1	TRUE	A0A2K3DLP9	A0A2K3DLP9	histone H3-K36 demethylation [GO:0070544]; histone H3-K4 demethylation [GO:0034720]	nucleolus [GO:0005730]	2-oxoglutarate-dependent dioxygenase activity [GO:0016706]; histone demethylase activity (H3-K36 specific) [GO:0051864]; histone demethylase activity (H3-K4 specific) [GO:0032453]; iron ion binding [GO:0005506]	histone H3-K36 demethylation [GO:0070544]; histone H3-K4 demethylation [GO:0034720]	nucleolus [GO:0005730]	2-oxoglutarate-dependent dioxygenase activity [GO:0016706]; histone demethylase activity (H3-K36 specific) [GO:0051864]; histone demethylase activity (H3-K4 specific) [GO:0032453]; iron ion binding [GO:0005506]	20210409_ALS_XL_F60.raw	4924
Intra	Cre02.g080700.t1.2	Cre02.g080700.t1.2	Endoplasmic reticulum associated Hsp70 protein	Endoplasmic reticulum associated Hsp70 protein	107	337	KYEDKEVQR	1×DSSO [K5]	KTMGPVKK	1×Oxidation [M3]; 1×DSSO [K1]	85.06	25.45	2	FALSE	A8I7T8	A8I7T8	cellular response to unfolded protein [GO:0034620]; chaperone cofactor-dependent protein refolding [GO:0051085]; endoplasmic reticulum unfolded protein response [GO:0030968]; protein refolding [GO:0042026]; ubiquitin-dependent ERAD pathway [GO:0030433]	cytoplasm [GO:0005737]; endoplasmic reticulum chaperone complex [GO:0034663]; endoplasmic reticulum lumen [GO:0005788]; membrane [GO:0016020]; nucleus [GO:0005634]	ATPase activity [GO:0016887]; ATP binding [GO:0005524]; heat shock protein binding [GO:0031072]; misfolded protein binding [GO:0051787]; protein folding chaperone [GO:0044183]; unfolded protein binding [GO:0051082]	cellular response to unfolded protein [GO:0034620]; chaperone cofactor-dependent protein refolding [GO:0051085]; endoplasmic reticulum unfolded protein response [GO:0030968]; protein refolding [GO:0042026]; ubiquitin-dependent ERAD pathway [GO:0030433]	cytoplasm [GO:0005737]; endoplasmic reticulum chaperone complex [GO:0034663]; endoplasmic reticulum lumen [GO:0005788]; membrane [GO:0016020]; nucleus [GO:0005634]	ATPase activity [GO:0016887]; ATP binding [GO:0005524]; heat shock protein binding [GO:0031072]; misfolded protein binding [GO:0051787]; protein folding chaperone [GO:0044183]; unfolded protein binding [GO:0051082]	20210409_ALS_XL_F65.raw	7631
Intra	Cre12.g498600.t1.2	Cre12.g498600.t1.2	Eukaryotic translation elongation factor 1 alpha	Eukaryotic translation elongation factor 1 alpha	325	387	VEQGVVKPGDEVIFLPTHTTANPCTGKVFTVEMHHK	1×Carbamidomethyl [C24]; 1×Oxidation [M33]; 1×DSSO [K7]	TGDVMILKSDQTLK	1×Oxidation [M5]; 1×DSSO [K8]	84.69	44.84	1	FALSE	A0A2K3D3E1	A0A2K3D3E1	translation [GO:0006412]	NA	GTPase activity [GO:0003924]; GTP binding [GO:0005525]	translation [GO:0006412]	NA	GTPase activity [GO:0003924]; GTP binding [GO:0005525]	20210409_ALS_XL_F60.raw	36795
Intra	Cre14.g614900.t2.1	Cre14.g614900.t2.1	Glutaminyl-tRNA synthetase	Glutaminyl-tRNA synthetase	636	797	LKDEKDYYGLAPGK	1×DSSO [K2]	TVSLKESKPVSLKK	1×DSSO [K13]	84.69	84.69	2	FALSE	A0A2K3CXJ2	A0A2K3CXJ2	glutaminyl-tRNA aminoacylation [GO:0006425]	cytoplasm [GO:0005737]	ATP binding [GO:0005524]; glutamine-tRNA ligase activity [GO:0004819]	glutaminyl-tRNA aminoacylation [GO:0006425]	cytoplasm [GO:0005737]	ATP binding [GO:0005524]; glutamine-tRNA ligase activity [GO:0004819]	20210409_ALS_XL_F62.raw	26038
Intra	Cre09.g406200.t1.2	Cre09.g406200.t1.2	organellar class II (G, H, P and S) aminoacyl tRNA synthetase	organellar class II (G, H, P and S) aminoacyl tRNA synthetase	395	402	LAAAAKAAGIR	1×DSSO [K6]	VKVDMDER	1×Oxidation [M5]; 1×DSSO [K2]	84.61	24.32	3	TRUE	A0A2K3DFA0	A0A2K3DFA0	prolyl-tRNA aminoacylation [GO:0006433]	aminoacyl-tRNA synthetase multienzyme complex [GO:0017101]; cytoplasm [GO:0005737]	ATP binding [GO:0005524]; proline-tRNA ligase activity [GO:0004827]	prolyl-tRNA aminoacylation [GO:0006433]	aminoacyl-tRNA synthetase multienzyme complex [GO:0017101]; cytoplasm [GO:0005737]	ATP binding [GO:0005524]; proline-tRNA ligase activity [GO:0004827]	20210409_ALS_XL_F55.raw	16303
Inter	Cre17.g701200.t1.2	Cre12.g532550.t1.1	Cytosolic 80S ribosomal protein L14	Cytosolic 80S ribosomal protein L13a	123	172	KVLNGLKK	1×DSSO [K1]	SKAAAQVKA	1×DSSO [K8]	84.61	41.54	5	TRUE	A8IQE3	A0A2K3D4X3	ribosomal large subunit biogenesis [GO:0042273]; translation [GO:0006412]	cytosolic large ribosomal subunit [GO:0022625]	RNA binding [GO:0003723]; structural constituent of ribosome [GO:0003735]	negative regulation of translation [GO:0017148]; translation [GO:0006412]	cytosolic large ribosomal subunit [GO:0022625]; ribosome [GO:0005840]	mRNA binding [GO:0003729]; structural constituent of ribosome [GO:0003735]	20210409_ALS_XL_F59.raw	12972
Intra	Cre12.g517900.t1.1	Cre12.g517900.t1.1	Chloroplast-associated SecA protein	Chloroplast-associated SecA protein	496	492	MHKTGRPVLVGTTSVEK	1×Oxidation [M1]; 1×DSSO [K3]	AVVTEVKR	1×DSSO [K7]	84.61	40.65	1	TRUE	A0A2K3D3X9	A0A2K3D3X9	protein import [GO:0017038]; protein targeting [GO:0006605]	membrane [GO:0016020]	ABC-type protein transporter activity [GO:0015462]; ATP binding [GO:0005524]; chloroplast protein-transporting ATPase activity [GO:0016464]; P-P-bond-hydrolysis-driven protein transmembrane transporter activity [GO:0015450]	protein import [GO:0017038]; protein targeting [GO:0006605]	membrane [GO:0016020]	ABC-type protein transporter activity [GO:0015462]; ATP binding [GO:0005524]; chloroplast protein-transporting ATPase activity [GO:0016464]; P-P-bond-hydrolysis-driven protein transmembrane transporter activity [GO:0015450]	20210409_ALS_XL_F61.raw	18879
Inter	Cre10.g423650.t1.2	Cre10.g430150.t1.2	Chloroplast ribosomal protein L11	Photosystem-II repair protein	146	351	KQVAEIAAKK	1×DSSO [K9]	KAASEPK	1×DSSO [K1]	84.11	6.11	2	TRUE	A8ICE4	A1YSB4	translation [GO:0006412]	large ribosomal subunit [GO:0015934]	large ribosomal subunit rRNA binding [GO:0070180]; structural constituent of ribosome [GO:0003735]	NA	integral component of membrane [GO:0016021]; thylakoid [GO:0009579]	NA	20210409_ALS_XL_F60.raw	12495
Inter	Cre10.g423650.t1.2	Cre10.g430150.t1.2	Chloroplast ribosomal protein L11	Photosystem-II repair protein	129	351	GASKPNKENVGQVTRK	1×DSSO [K7]	KAASEPK	1×DSSO [K1]	84.11	84.11	1	TRUE	A8ICE4	A1YSB4	translation [GO:0006412]	large ribosomal subunit [GO:0015934]	large ribosomal subunit rRNA binding [GO:0070180]; structural constituent of ribosome [GO:0003735]	NA	integral component of membrane [GO:0016021]; thylakoid [GO:0009579]	NA	20210409_ALS_XL_F63.raw	10939
Intra	Cre16.g680700.t1.2	Cre16.g680700.t1.2	Aluminium induced protein with YGL and LRDR motifs	Aluminium induced protein with YGL and LRDR motifs	58	64	VIDTVFNAAKPASR	1×DSSO [K10]	HKQLLGK	1×DSSO [K2]	84.08	50.16	1	TRUE	A8J3W1	A8J3W1	NA	NA	NA	NA	NA	NA	20210409_ALS_XL_F59.raw	27678
Intra	Cre01.g011000.t1.2	Cre01.g011000.t1.2	Cytosolic 80S ribosomal protein L6	Cytosolic 80S ribosomal protein L6	176	162	EFFDQSEAKKNVLSQEYIANQK	1×DSSO [K10]	SSKKGEK	1×DSSO [K3]	84.08	84.08	1	TRUE	A8HP90	A8HP90	cytoplasmic translation [GO:0002181]; ribosomal large subunit assembly [GO:0000027]	cytosolic large ribosomal subunit [GO:0022625]	RNA binding [GO:0003723]; structural constituent of ribosome [GO:0003735]	cytoplasmic translation [GO:0002181]; ribosomal large subunit assembly [GO:0000027]	cytosolic large ribosomal subunit [GO:0022625]	RNA binding [GO:0003723]; structural constituent of ribosome [GO:0003735]	20210409_ALS_XL_F61.raw	28864
Intra	Cre01.g040000.t1.2	Cre01.g040000.t1.2	Cytosolic 80S ribosomal protein L26	Cytosolic 80S ribosomal protein L26	68	109	EGKVVEVYR	1×DSSO [K3]	LKLDKDR	1×DSSO [K2]	84.02	38.57	1	TRUE	A8HMG7	A8HMG7	cytoplasmic translation [GO:0002181]; ribosomal large subunit biogenesis [GO:0042273]	cytosolic large ribosomal subunit [GO:0022625]	RNA binding [GO:0003723]; structural constituent of ribosome [GO:0003735]	cytoplasmic translation [GO:0002181]; ribosomal large subunit biogenesis [GO:0042273]	cytosolic large ribosomal subunit [GO:0022625]	RNA binding [GO:0003723]; structural constituent of ribosome [GO:0003735]	20210409_ALS_XL_F60.raw	20149
Intra	Cre17.g698000.t1.2	Cre17.g698000.t1.2	Mitochondrial F1F0 ATP synthase, beta subunit	Mitochondrial F1F0 ATP synthase, beta subunit	523	514	AKSSEALKDVPSLEK	1×DSSO [K8]	KDESKK	1×DSSO [K5]	83.88	83.88	2	TRUE	A8IQU3	A8IQU3	mitochondrial ATP synthesis coupled proton transport [GO:0042776]	mitochondrial proton-transporting ATP synthase complex [GO:0005753]; proton-transporting ATP synthase complex, catalytic core F(1) [GO:0045261]	ATP binding [GO:0005524]; hydrolase activity [GO:0016787]; proton-transporting ATPase activity, rotational mechanism [GO:0046961]; proton-transporting ATP synthase activity, rotational mechanism [GO:0046933]	mitochondrial ATP synthesis coupled proton transport [GO:0042776]	mitochondrial proton-transporting ATP synthase complex [GO:0005753]; proton-transporting ATP synthase complex, catalytic core F(1) [GO:0045261]	ATP binding [GO:0005524]; hydrolase activity [GO:0016787]; proton-transporting ATPase activity, rotational mechanism [GO:0046961]; proton-transporting ATP synthase activity, rotational mechanism [GO:0046933]	20210409_ALS_XL_F64.raw	19074
Intra	Cre16.g672750.t1.2	Cre16.g672750.t1.2	binding to TOMV RNA 1L (long form)	binding to TOMV RNA 1L (long form)	134	127	GVPVKKPEDAGQAQVK	1×DSSO [K6]	DVSAGAGANGAKR	1×DSSO [K12]	83.75	83.75	1	TRUE	A8J3F8	A8J3F8	regulation of gene expression [GO:0010468]	cytoplasm [GO:0005737]; nucleus [GO:0005634]	mRNA binding [GO:0003729]	regulation of gene expression [GO:0010468]	cytoplasm [GO:0005737]; nucleus [GO:0005634]	mRNA binding [GO:0003729]	20210409_ALS_XL_F56.raw	13474
Intra	Cre09.g397697.t1.1	Cre09.g397697.t1.1	Ribosomal protein L4	Ribosomal protein L4	363	357	GEKTGGQKDK	1×DSSO [K3]	LAKIAK	1×DSSO [K3]	83.73	15.36	2	TRUE	A8J0I0	A8J0I0	translation [GO:0006412]	cytosolic large ribosomal subunit [GO:0022625]	RNA binding [GO:0003723]; structural constituent of ribosome [GO:0003735]	translation [GO:0006412]	cytosolic large ribosomal subunit [GO:0022625]	RNA binding [GO:0003723]; structural constituent of ribosome [GO:0003735]	20210409_ALS_XL_F60.raw	6430
Intra	Cre06.g306300.t1.2	Cre06.g306300.t1.2	Magnesium chelatase subunit I, isoform 1	Magnesium chelatase subunit I, isoform 1	329	364	LLKQGEVNYDFR	1×DSSO [K3]	AAKALAAFEGR	1×DSSO [K3]	83.61	51.68	2	TRUE	A8IMZ5	A8IMZ5	chlorophyll biosynthetic process [GO:0015995]; photosynthesis [GO:0015979]	chloroplast stroma [GO:0009570]	ATP binding [GO:0005524]; magnesium chelatase activity [GO:0016851]	chlorophyll biosynthetic process [GO:0015995]; photosynthesis [GO:0015979]	chloroplast stroma [GO:0009570]	ATP binding [GO:0005524]; magnesium chelatase activity [GO:0016851]	20210409_ALS_XL_F55.raw	33736
Intra	Cre03.g194350.t1.2	Cre03.g194350.t1.2	proton pump interactor 1	proton pump interactor 1	390	398	AGDAGKPGAKGGKPDKGAK	1×DSSO [K16]	APPPKPQGAEK	1×DSSO [K5]	83.61	83.61	1	TRUE	A0A2K3DYI3	A0A2K3DYI3	NA	integral component of membrane [GO:0016021]	NA	NA	integral component of membrane [GO:0016021]	NA	20210409_ALS_XL_F63.raw	6052
Intra	Cre09.g393358.t1.1	Cre09.g393358.t1.1	Hyaluronan / mRNA binding family	Hyaluronan / mRNA binding family	34	46	EAPKEEAKPAK	1×DSSO [K4]	APVAKQEAPR	1×DSSO [K5]	83.38	83.38	1	TRUE	A8J087	A8J087	NA	cytoplasm [GO:0005737]; nucleus [GO:0005634]	RNA binding [GO:0003723]	NA	cytoplasm [GO:0005737]; nucleus [GO:0005634]	RNA binding [GO:0003723]	20210409_ALS_XL_F57.raw	9222
Intra	Cre03.g200991.t1.1	Cre03.g200991.t1.1	CDK inhibitor P21 binding protein	CDK inhibitor P21 binding protein	451	458	AAAGQGAAGGKGKGK	1×DSSO [K13]	GAGGKAGGSGR	1×DSSO [K5]	83.38	83.38	1	TRUE	A0A2K3DZK3	A0A2K3DZK3	NA	nucleus [GO:0005634]	NA	NA	nucleus [GO:0005634]	NA	20210409_ALS_XL_F59.raw	3536
Intra	Cre06.g275100.t1.2	Cre06.g275100.t1.2	Nucleolin	Nucleolin	60	55	KEESSDDSDDDDDSDDDSDDEPPKK	1×DSSO [K1]	AAPAKAPAK	1×DSSO [K5]	83.11	44.29	2	TRUE	A0A2K3DNK6	A0A2K3DNK6	NA	ribonucleoprotein complex [GO:1990904]	RNA binding [GO:0003723]	NA	ribonucleoprotein complex [GO:1990904]	RNA binding [GO:0003723]	20210409_ALS_XL_F56.raw	7219
Intra	Cre09.g415800.t1.2	Cre09.g415800.t1.2	MA3 domain-containing protein	MA3 domain-containing protein	47	61	AAANHKAAAASGER	1×DSSO [K6]	SAKGPGGAK	1×DSSO [K3]	82.94	43.79	2	TRUE	A0A2K3DG12	A0A2K3DG12	negative regulation of transcription, DNA-templated [GO:0045892]	cytoplasm [GO:0005737]	NA	negative regulation of transcription, DNA-templated [GO:0045892]	cytoplasm [GO:0005737]	NA	20210409_ALS_XL_F59.raw	5492
Intra	Cre13.g581650.t1.2	Cre13.g581650.t1.2	Chloroplast ribosomal protein L7/L12	Chloroplast ribosomal protein L7/L12	106	158	TTFDVVLEEIPADKK	1×DSSO [K14]	AQLLEAGAKAK	1×DSSO [K9]	82.86	35.26	1	TRUE	A0A2K3D0E8	A0A2K3D0E8	translation [GO:0006412]	ribosome [GO:0005840]	structural constituent of ribosome [GO:0003735]	translation [GO:0006412]	ribosome [GO:0005840]	structural constituent of ribosome [GO:0003735]	20210409_ALS_XL_F49.raw	40380
Intra	Cre09.g393358.t1.1	Cre09.g393358.t1.1	Hyaluronan / mRNA binding family	Hyaluronan / mRNA binding family	41	26	EAPKEEAKPAKAPVAK	1×DSSO [K11]	APKPVKKEAPK	1×DSSO [K3]	82.85	82.85	2	TRUE	A8J087	A8J087	NA	cytoplasm [GO:0005737]; nucleus [GO:0005634]	RNA binding [GO:0003723]	NA	cytoplasm [GO:0005737]; nucleus [GO:0005634]	RNA binding [GO:0003723]	20210409_ALS_XL_F64.raw	9748
Intra	Cre04.g222700.t1.2	Cre04.g222700.t1.2	Elongation Factor 3 and ABC transporter	Elongation Factor 3 and ABC transporter	681	685	LPEPGYLEGVKTK	1×DSSO [K11]	DKAILK	1×DSSO [K2]	82.63	34.64	1	TRUE	A8ISZ1	A8ISZ1	NA	NA	ATPase activity [GO:0016887]; ATP binding [GO:0005524]; translation elongation factor activity [GO:0003746]	NA	NA	ATPase activity [GO:0016887]; ATP binding [GO:0005524]; translation elongation factor activity [GO:0003746]	20210409_ALS_XL_F54.raw	30004
Intra	Cre06.g261450.t1.2	Cre06.g261450.t1.2	High mobility group protein	High mobility group protein	42	46	APPKEKPAK	1×DSSO [K6]	KAPAKK	1×DSSO [K1]	82.63	8.04	1	FALSE	A8HXE1	A8HXE1	NA	nucleus [GO:0005634]	DNA binding, bending [GO:0008301]	NA	nucleus [GO:0005634]	DNA binding, bending [GO:0008301]	20210409_ALS_XL_F64.raw	3993
Intra	Cre09.g386750.t1.2	Cre09.g386750.t1.2	Heat shock protein 90A	Heat shock protein 90A	387	383	KNIVKK	1×DSSO [K1]	ILKVIK	1×DSSO [K3]	87.12	28.96	3	TRUE	A8J1U1	A8J1U1	cellular response to heat [GO:0034605]; protein folding [GO:0006457]; protein stabilization [GO:0050821]	cytosol [GO:0005829]; perinuclear region of cytoplasm [GO:0048471]; plasma membrane [GO:0005886]; protein-containing complex [GO:0032991]	ATPase activity [GO:0016887]; ATP binding [GO:0005524]; unfolded protein binding [GO:0051082]	cellular response to heat [GO:0034605]; protein folding [GO:0006457]; protein stabilization [GO:0050821]	cytosol [GO:0005829]; perinuclear region of cytoplasm [GO:0048471]; plasma membrane [GO:0005886]; protein-containing complex [GO:0032991]	ATPase activity [GO:0016887]; ATP binding [GO:0005524]; unfolded protein binding [GO:0051082]	20210409_ALS_XL_F60.raw	16466
Intra	Cre06.g275100.t1.2	Cre06.g275100.t1.2	Nucleolin	Nucleolin	162	1	KKAAAPAAAK	1×DSSO [K1]	GKPVK	1×DSSO [G1]	82.39	82.39	1	FALSE	A0A2K3DNK6	A0A2K3DNK6	NA	ribonucleoprotein complex [GO:1990904]	RNA binding [GO:0003723]	NA	ribonucleoprotein complex [GO:1990904]	RNA binding [GO:0003723]	20210409_ALS_XL_F59.raw	4210
Inter	Cre06.g306300.t1.2	Cre11.g477733.t1.2	Magnesium chelatase subunit I, isoform 1	None	157	19	VKAGEQLPVSSK	1×DSSO [K2]	RAEEVKAAEGR	1×DSSO [K6]	82.39	40.93	1	TRUE	A8IMZ5	A0A2K3D8F6	chlorophyll biosynthetic process [GO:0015995]; photosynthesis [GO:0015979]	chloroplast stroma [GO:0009570]	ATP binding [GO:0005524]; magnesium chelatase activity [GO:0016851]	NA	NA	NA	20210409_ALS_XL_F36.raw	22938
Intra	Cre11.g467612.t1.1	Cre11.g467612.t1.1	S-adenosyl-L-methionine-dependent methyltransferases superfamily protein	S-adenosyl-L-methionine-dependent methyltransferases superfamily protein	67	57	ATVKEYYGETLK	1×DSSO [K4]	AEQLGKDQDAVR	1×DSSO [K6]	82.31	34.7	1	TRUE	A0A2K3D7F7	A0A2K3D7F7	NA	NA	methyltransferase activity [GO:0008168]	NA	NA	methyltransferase activity [GO:0008168]	20210409_ALS_XL_F53.raw	25462
Inter	Cre06.g304876.t1.1	Cre01.g033550.t1.2	None	Protein disulfide isomerase	576	165	GRAKAEAAIAK	1×DSSO [K4]	KFVDAAADAK	1×DSSO [K1]	81.96	16.28	1	TRUE	A0A2K3DR75	A8HQT1	O-glycan processing, core 1 [GO:0016267]	NA	glycoprotein-N-acetylgalactosamine 3-beta-galactosyltransferase activity [GO:0016263]	NA	endoplasmic reticulum [GO:0005783]	protein disulfide isomerase activity [GO:0003756]	20210409_ALS_XL_F55.raw	29286
Inter	Cre14.g617900.t1.2	Cre10.g430400.t1.2	Cytosolic 80S ribosomal protein L35	Cytosolic 80S ribosomal protein L37	72	88	NKIKEENEK	1×DSSO [K2]	EGSEAKPK	1×DSSO [K6]	81.88	76.72	1	TRUE	A8HNX3	A8IBG1	maturation of LSU-rRNA from tricistronic rRNA transcript (SSU-rRNA, 5.8S rRNA, LSU-rRNA) [GO:0000463]; translation [GO:0006412]	cytosolic large ribosomal subunit [GO:0022625]	mRNA binding [GO:0003729]; structural constituent of ribosome [GO:0003735]	translation [GO:0006412]	cytosolic large ribosomal subunit [GO:0022625]	metal ion binding [GO:0046872]; RNA binding [GO:0003723]; rRNA binding [GO:0019843]; structural constituent of ribosome [GO:0003735]	20210409_ALS_XL_F61.raw	6098
Inter	Cre06.g253350.t1.2	Cre09.g410800.t1.2	Glycine cleavage system H protein, mitochondrial	High affinity nitrate transporter	140	1	LSNKGELSSLLDSDAYAK	1×DSSO [K4]	ATVEK	1×DSSO [A1]	81.69	35.07	1	TRUE	A8HYD5	Q39609	glycine decarboxylation via glycine cleavage system [GO:0019464]; protein lipoylation [GO:0009249]	cytoplasm [GO:0005737]; glycine cleavage complex [GO:0005960]; mitochondrion [GO:0005739]	ATP binding [GO:0005524]	nitrate assimilation [GO:0042128]	integral component of membrane [GO:0016021]; plasma membrane [GO:0005886]	nitrate transmembrane transporter activity [GO:0015112]; nitrite transmembrane transporter activity [GO:0015113]	20210409_ALS_XL_F38.raw	33721
Intra	Cre07.g357850.t1.2	Cre07.g357850.t1.2	Cytosolic 80S ribosomal protein L22	Cytosolic 80S ribosomal protein L22	48	1	IKVDGKTGVLGDSIK	1×DSSO [K2]	AVGVK	1×DSSO [A1]	81.69	81.69	1	FALSE	A8JI94	A8JI94	cytoplasmic translation [GO:0002181]	ribosome [GO:0005840]	RNA binding [GO:0003723]; structural constituent of ribosome [GO:0003735]	cytoplasmic translation [GO:0002181]	ribosome [GO:0005840]	RNA binding [GO:0003723]; structural constituent of ribosome [GO:0003735]	20210409_ALS_XL_F55.raw	26119
Intra	Cre06.g275100.t1.2	Cre06.g275100.t1.2	Nucleolin	Nucleolin	131	136	GKPAAAPAAAAKK	1×DSSO [K12]	APAKK	1×DSSO [K4]	81.69	18.27	1	FALSE	A0A2K3DNK6	A0A2K3DNK6	NA	ribonucleoprotein complex [GO:1990904]	RNA binding [GO:0003723]	NA	ribonucleoprotein complex [GO:1990904]	RNA binding [GO:0003723]	20210409_ALS_XL_F58.raw	5722
Intra	Cre12.g498450.t1.2	Cre12.g498450.t1.2	Regulator of chromosome condensation (RCC1) family protein	Regulator of chromosome condensation (RCC1) family protein	28	31	AKEEAADKPVEEPKPK	1×DSSO [K14]	KAATK	1×DSSO [K1]	81.69	81.69	1	FALSE	A8JGJ7	A8JGJ7	Ran protein signal transduction [GO:0031291]; regulation of mitotic spindle assembly [GO:1901673]	cytoplasm [GO:0005737]	chromatin binding [GO:0003682]	Ran protein signal transduction [GO:0031291]; regulation of mitotic spindle assembly [GO:1901673]	cytoplasm [GO:0005737]	chromatin binding [GO:0003682]	20210409_ALS_XL_F61.raw	6858
Intra	Cre12.g515950.t1.2	Cre12.g515950.t1.2	None	None	474	466	AKAEAAAK	1×DSSO [K2]	IKAAAAAK	1×DSSO [K2]	81.67	9.68	1	FALSE	A0A2K3D3R9	A0A2K3D3R9	NA	NA	NA	NA	NA	NA	20210409_ALS_XL_F55.raw	5337
Intra	Cre02.g120150.t1.2	Cre02.g120150.t1.2	ribulose-1,5-bisphosphate carboxylase/oxygenase small subunit 2	ribulose-1,5-bisphosphate carboxylase/oxygenase small subunit 2	143	182	EIVACTKAFPDAYVR	1×Carbamidomethyl [C5]; 1×DSSO [K7]	DWQPANKR	1×DSSO [K7]	81.67	37.9	4	FALSE	P08475	P08475	carbon fixation [GO:0015977]; photorespiration [GO:0009853]; photosynthesis [GO:0015979]	plastid [GO:0009536]	monooxygenase activity [GO:0004497]; ribulose-bisphosphate carboxylase activity [GO:0016984]	carbon fixation [GO:0015977]; photorespiration [GO:0009853]; photosynthesis [GO:0015979]	plastid [GO:0009536]	monooxygenase activity [GO:0004497]; ribulose-bisphosphate carboxylase activity [GO:0016984]	20210409_ALS_XL_F55.raw	32285
Intra	Cre06.g258700.t1.1	Cre06.g258700.t1.1	Pyruvate carboxylase	Pyruvate carboxylase	804	823	AVGELQPNGKR	1×DSSO [K10]	VVEVGDKK	1×DSSO [K7]	81.58	17.5	1	TRUE	A0A2K3DMK8	A0A2K3DMK8	gluconeogenesis [GO:0006094]; pyruvate metabolic process [GO:0006090]	cytoplasm [GO:0005737]	ATP binding [GO:0005524]; metal ion binding [GO:0046872]; pyruvate carboxylase activity [GO:0004736]	gluconeogenesis [GO:0006094]; pyruvate metabolic process [GO:0006090]	cytoplasm [GO:0005737]	ATP binding [GO:0005524]; metal ion binding [GO:0046872]; pyruvate carboxylase activity [GO:0004736]	20210409_ALS_XL_F55.raw	15177
Intra	Cre09.g393358.t1.1	Cre09.g393358.t1.1	Hyaluronan / mRNA binding family	Hyaluronan / mRNA binding family	30	26	KEAPKEEAKPAK	1×DSSO [K1]	APKPVK	1×DSSO [K3]	81.36	81.36	2	TRUE	A8J087	A8J087	NA	cytoplasm [GO:0005737]; nucleus [GO:0005634]	RNA binding [GO:0003723]	NA	cytoplasm [GO:0005737]; nucleus [GO:0005634]	RNA binding [GO:0003723]	20210409_ALS_XL_F61.raw	6341
Intra	Cre16.g660150.t1.2	Cre16.g660150.t1.2	Ribosomal protein S10p/S20e family protein	Ribosomal protein S10p/S20e family protein	43	32	VCADLIKGAK	1×Carbamidomethyl [C2]; 1×DSSO [K7]	NVKNLEK	1×DSSO [K3]	81.22	41.92	1	TRUE	A0A2K3CTK0	A0A2K3CTK0	translation [GO:0006412]	cytosolic small ribosomal subunit [GO:0022627]; small ribosomal subunit [GO:0015935]	structural constituent of ribosome [GO:0003735]	translation [GO:0006412]	cytosolic small ribosomal subunit [GO:0022627]; small ribosomal subunit [GO:0015935]	structural constituent of ribosome [GO:0003735]	20210409_ALS_XL_F56.raw	20610
Intra	Cre06.g294950.t1.1	Cre06.g294950.t1.1	Enoyl-[acyl-carrier-protein] reductase	Enoyl-[acyl-carrier-protein] reductase	306	129	AAKAIGFIDDMIR	1×Oxidation [M11]; 1×DSSO [K3]	TSLDKGKFDESR	1×DSSO [K5]	81.02	81.02	1	TRUE	A0A2K3DQI2	A0A2K3DQI2	fatty acid biosynthetic process [GO:0006633]	NA	enoyl-[acyl-carrier-protein] reductase (NADH) activity [GO:0004318]	fatty acid biosynthetic process [GO:0006633]	NA	enoyl-[acyl-carrier-protein] reductase (NADH) activity [GO:0004318]	20210409_ALS_XL_F58.raw	32501
Intra	Cre09.g397549.t1.1	Cre09.g397549.t1.1	Kinase-related protein of unknown function (DUF1296)	Kinase-related protein of unknown function (DUF1296)	15	4	KVIEAMKEATGASEEDVK	1×Oxidation [M6]; 1×DSSO [K7]	SDKQFPK	1×Acetyl [S1]; 1×DSSO [K3]	81	81	3	TRUE	A0A2K3DEQ6	A0A2K3DEQ6	NA	NA	NA	NA	NA	NA	20210409_ALS_XL_F50.raw	20793
Inter	Cre12.g498600.t1.2	Cre05.g233050.t1.2	Eukaryotic translation elongation factor 1 alpha	Flagellar Associated Protein 162	103	5	AKEERER	1×DSSO [K2]	SDVKAAK	1×Acetyl [S1]; 1×DSSO [K4]	81	8.66	1	FALSE	A0A2K3D3E1	A8JG73	translation [GO:0006412]	NA	GTPase activity [GO:0003924]; GTP binding [GO:0005525]	NA	motile cilium [GO:0031514]	NA	20210409_ALS_XL_F57.raw	6347
Intra	Cre09.g393358.t1.1	Cre09.g393358.t1.1	Hyaluronan / mRNA binding family	Hyaluronan / mRNA binding family	34	26	EAPKEEAKPAKAPVAK	1×DSSO [K4]	APKPVKK	1×DSSO [K3]	81	81	1	TRUE	A8J087	A8J087	NA	cytoplasm [GO:0005737]; nucleus [GO:0005634]	RNA binding [GO:0003723]	NA	cytoplasm [GO:0005737]; nucleus [GO:0005634]	RNA binding [GO:0003723]	20210409_ALS_XL_F63.raw	8206
Intra	Cre06.g261450.t1.2	Cre06.g261450.t1.2	High mobility group protein	High mobility group protein	54	51	KAKDPNAPK	1×DSSO [K1]	APAKKEK	1×DSSO [K5]	81	10.89	1	TRUE	A8HXE1	A8HXE1	NA	nucleus [GO:0005634]	DNA binding, bending [GO:0008301]	NA	nucleus [GO:0005634]	DNA binding, bending [GO:0008301]	20210409_ALS_XL_F64.raw	3573
Intra	Cre13.g573250.t1.2	Cre13.g573250.t1.2	sulfurtransferase protein 16	sulfurtransferase protein 16	118	105	DMKKTPNPDFVK	1×Oxidation [M2]; 1×DSSO [K3]	GSVNVPFVHLKR	1×DSSO [K11]	80.74	44.18	1	TRUE	A8HSU1	A8HSU1	NA	NA	NA	NA	NA	NA	20210409_ALS_XL_F60.raw	32037
Intra	Cre09.g412100.t1.2	Cre09.g412100.t1.2	Photosystem I reaction center subunit III	Photosystem I reaction center subunit III	85	78	ELKTLEKR	1×DSSO [K3]	AYAKLEKK	1×DSSO [K4]	80.57	28.24	2	TRUE	A8J4S1	A8J4S1	photosynthesis [GO:0015979]	chloroplast thylakoid membrane [GO:0009535]; photosystem I reaction center [GO:0009538]	NA	photosynthesis [GO:0015979]	chloroplast thylakoid membrane [GO:0009535]; photosystem I reaction center [GO:0009538]	NA	20210409_ALS_XL_F59.raw	16315
Inter	Cre02.g101350.t1.2	Cre06.g310700.t1.2	Cytosolic 80S ribosomal protein L10a	Ribosomal protein L36a	46	6	NYDPQKDKR	1×DSSO [K8]	VNVPKTK	1×DSSO [K5]	80.57	55.94	2	TRUE	A8I4T2	A8IM74	maturation of LSU-rRNA [GO:0000470]; translation [GO:0006412]	cytosolic large ribosomal subunit [GO:0022625]	RNA binding [GO:0003723]; structural constituent of ribosome [GO:0003735]	translation [GO:0006412]	cytosolic large ribosomal subunit [GO:0022625]	structural constituent of ribosome [GO:0003735]	20210409_ALS_XL_F61.raw	11951
Intra	Cre09.g386750.t1.2	Cre09.g386750.t1.2	Heat shock protein 90A	Heat shock protein 90A	605	588	KTLEINPENAIMNELKK	1×Oxidation [M12]; 1×DSSO [K1]	IMKAQALR	1×Oxidation [M2]; 1×DSSO [K3]	78.86	39.84	3	TRUE	A8J1U1	A8J1U1	cellular response to heat [GO:0034605]; protein folding [GO:0006457]; protein stabilization [GO:0050821]	cytosol [GO:0005829]; perinuclear region of cytoplasm [GO:0048471]; plasma membrane [GO:0005886]; protein-containing complex [GO:0032991]	ATPase activity [GO:0016887]; ATP binding [GO:0005524]; unfolded protein binding [GO:0051082]	cellular response to heat [GO:0034605]; protein folding [GO:0006457]; protein stabilization [GO:0050821]	cytosol [GO:0005829]; perinuclear region of cytoplasm [GO:0048471]; plasma membrane [GO:0005886]; protein-containing complex [GO:0032991]	ATPase activity [GO:0016887]; ATP binding [GO:0005524]; unfolded protein binding [GO:0051082]	20210409_ALS_XL_F52.raw	36883
Inter	Cre17.g734100.t1.2	gi|41179046|ref|NP_958402.1|	adenylosuccinate synthase	ribosomal protein S3 (chloroplast)	165	910	EAELAGDGKQIGTTKR	1×DSSO [K15]	LSKAVFMR	1×Oxidation [M7]; 1×DSSO [K3]	80.5	46.7	1	TRUE	A8IW34	Q08365	'de novo' AMP biosynthetic process [GO:0044208]; IMP metabolic process [GO:0046040]; response to cadmium ion [GO:0046686]	apoplast [GO:0048046]; chloroplast stroma [GO:0009570]; cytoplasm [GO:0005737]	adenylosuccinate synthase activity [GO:0004019]; GTP binding [GO:0005525]; magnesium ion binding [GO:0000287]	translation [GO:0006412]	chloroplast [GO:0009507]; cytosolic small ribosomal subunit [GO:0022627]	RNA binding [GO:0003723]; structural constituent of ribosome [GO:0003735]	20210409_ALS_XL_F64.raw	20915
Intra	Cre08.g360900.t1.2	Cre08.g360900.t1.2	Cytosolic 80S ribosomal protein S15	Cytosolic 80S ribosomal protein S15	64	9	VKKLAASGEKPEPVR	1×DSSO [K2]	ADAAGDKKR	1×Acetyl [A1]; 1×DSSO [K8]	80.38	80.38	1	TRUE	A8J493	A8J493	ribosomal small subunit assembly [GO:0000028]; translation [GO:0006412]	cytosolic small ribosomal subunit [GO:0022627]	RNA binding [GO:0003723]; structural constituent of ribosome [GO:0003735]	ribosomal small subunit assembly [GO:0000028]; translation [GO:0006412]	cytosolic small ribosomal subunit [GO:0022627]	RNA binding [GO:0003723]; structural constituent of ribosome [GO:0003735]	20210409_ALS_XL_F61.raw	12701
Intra	Cre01.g044800.t1.2	Cre01.g044800.t1.2	Pyruvate-formate lyase	Pyruvate-formate lyase	699	690	KKGEPFAPGANPLHGR	1×DSSO [K1]	KTGSTPDGR	1×DSSO [K1]	80.38	80.38	1	TRUE	A0A2K3E7P1	A0A2K3E7P1	carbohydrate metabolic process [GO:0005975]; threonine catabolic process [GO:0006567]	cytosol [GO:0005829]	formate C-acetyltransferase activity [GO:0008861]	carbohydrate metabolic process [GO:0005975]; threonine catabolic process [GO:0006567]	cytosol [GO:0005829]	formate C-acetyltransferase activity [GO:0008861]	20210409_ALS_XL_F63.raw	17648
Intra	Cre06.g255100.t1.1	Cre06.g255100.t1.1	None	None	541	550	ELDELSEAHAKLEATAR	1×DSSO [K11]	ALKGSQEAAAR	1×DSSO [K3]	80.03	45.09	1	TRUE	A0A2K3DMB8	A0A2K3DMB8	NA	NA	NA	NA	NA	NA	20210409_ALS_XL_F57.raw	28907
Intra	Cre02.g076250.t1.1	Cre02.g076250.t1.1	Chloroplast elongation factor G	Chloroplast elongation factor G	501	494	ADLEKMGMGLNK	1×Oxidation [M8]; 1×DSSO [K5]	IAIEPKSK	1×DSSO [K6]	79.93	79.93	1	TRUE	A0A2K3E076	A0A2K3E076	chloroplast organization [GO:0009658]; mitochondrial translation [GO:0032543]; ribosome disassembly [GO:0032790]; seed germination [GO:0009845]	apoplast [GO:0048046]; chloroplast envelope [GO:0009941]; chloroplast stroma [GO:0009570]; mitochondrion [GO:0005739]	ATP binding [GO:0005524]; GTPase activity [GO:0003924]; GTP binding [GO:0005525]; mRNA binding [GO:0003729]; translation elongation factor activity [GO:0003746]	chloroplast organization [GO:0009658]; mitochondrial translation [GO:0032543]; ribosome disassembly [GO:0032790]; seed germination [GO:0009845]	apoplast [GO:0048046]; chloroplast envelope [GO:0009941]; chloroplast stroma [GO:0009570]; mitochondrion [GO:0005739]	ATP binding [GO:0005524]; GTPase activity [GO:0003924]; GTP binding [GO:0005525]; mRNA binding [GO:0003729]; translation elongation factor activity [GO:0003746]	20210409_ALS_XL_F54.raw	24035
Inter	Cre02.g102250.t1.2	Cre09.g411100.t1.2	Cytosolic 80S ribosomal protein S3	Cytosolic 80S ribosomal protein S10	19	94	TQNVLGEKGRR	1×DSSO [K8]	KSNRPLER	1×DSSO [K1]	79.93	37.22	5	TRUE	A0A2K3E2C7	A8J4Q3	translation [GO:0006412]	cytosolic small ribosomal subunit [GO:0022627]; nucleus [GO:0005634]	RNA binding [GO:0003723]; structural constituent of ribosome [GO:0003735]	ribosomal small subunit assembly [GO:0000028]	cytosolic small ribosomal subunit [GO:0022627]	RNA binding [GO:0003723]; structural constituent of ribosome [GO:0003735]	20210409_ALS_XL_F67.raw	13173
Inter	Cre03.g211521.t1.1	Cre06.g306300.t1.2	Flagellar Associated Protein 165	Magnesium chelatase subunit I, isoform 1	74	329	RGDKFNVIHISDMSK	1×DSSO [K4]	LLKQGEVNYDFR	1×DSSO [K3]	79.91	43.57	1	TRUE	A0A2K3DZW6	A8IMZ5	NA	NA	NA	chlorophyll biosynthetic process [GO:0015995]; photosynthesis [GO:0015979]	chloroplast stroma [GO:0009570]	ATP binding [GO:0005524]; magnesium chelatase activity [GO:0016851]	20210409_ALS_XL_F52.raw	37006
Intra	Cre07.g341650.t1.2	Cre07.g341650.t1.2	C2H2 and C2HC zinc fingers superfamily protein	C2H2 and C2HC zinc fingers superfamily protein	9	3	KASGVDNTAR	1×DSSO [K1]	SKITGGK	1×Acetyl [S1]; 1×DSSO [K2]	79.45	41.45	2	TRUE	A8ITP7	A8ITP7	mRNA splicing, via spliceosome [GO:0000398]	spliceosomal complex [GO:0005681]; U4/U6 x U5 tri-snRNP complex [GO:0046540]	nucleic acid binding [GO:0003676]; zinc ion binding [GO:0008270]	mRNA splicing, via spliceosome [GO:0000398]	spliceosomal complex [GO:0005681]; U4/U6 x U5 tri-snRNP complex [GO:0046540]	nucleic acid binding [GO:0003676]; zinc ion binding [GO:0008270]	20210409_ALS_XL_F41.raw	10883
Intra	Cre12.g505850.t1.2	Cre12.g505850.t1.2	Chaperonin 23	Chaperonin 23	68	55	GGILLPPSAIKKPTSGEVVQLGDGR	1×DSSO [K11]	VAEEEVKTR	1×DSSO [K7]	79.37	79.37	1	TRUE	A8IJY7	A8IJY7	chaperone cofactor-dependent protein refolding [GO:0051085]	chloroplast [GO:0009507]; mitochondrial matrix [GO:0005759]; plastid [GO:0009536]	ATPase activity [GO:0016887]; ATP binding [GO:0005524]; chaperone binding [GO:0051087]; metal ion binding [GO:0046872]; unfolded protein binding [GO:0051082]	chaperone cofactor-dependent protein refolding [GO:0051085]	chloroplast [GO:0009507]; mitochondrial matrix [GO:0005759]; plastid [GO:0009536]	ATPase activity [GO:0016887]; ATP binding [GO:0005524]; chaperone binding [GO:0051087]; metal ion binding [GO:0046872]; unfolded protein binding [GO:0051082]	20210409_ALS_XL_F55.raw	32437
Intra	Cre06.g275100.t1.2	Cre06.g275100.t1.2	Nucleolin	Nucleolin	307	318	ATSKAGSELGGR	1×DSSO [K4]	NIKVEVAQAR	1×DSSO [K3]	79.12	37.13	1	TRUE	A0A2K3DNK6	A0A2K3DNK6	NA	ribonucleoprotein complex [GO:1990904]	RNA binding [GO:0003723]	NA	ribonucleoprotein complex [GO:1990904]	RNA binding [GO:0003723]	20210409_ALS_XL_F55.raw	18873
Intra	Cre14.g617900.t1.2	Cre14.g617900.t1.2	Cytosolic 80S ribosomal protein L35	Cytosolic 80S ribosomal protein L35	14	74	NMSKQDLITR	1×DSSO [K4]	NKIKEENEK	1×DSSO [K4]	78.99	78.99	1	TRUE	A8HNX3	A8HNX3	maturation of LSU-rRNA from tricistronic rRNA transcript (SSU-rRNA, 5.8S rRNA, LSU-rRNA) [GO:0000463]; translation [GO:0006412]	cytosolic large ribosomal subunit [GO:0022625]	mRNA binding [GO:0003729]; structural constituent of ribosome [GO:0003735]	maturation of LSU-rRNA from tricistronic rRNA transcript (SSU-rRNA, 5.8S rRNA, LSU-rRNA) [GO:0000463]; translation [GO:0006412]	cytosolic large ribosomal subunit [GO:0022625]	mRNA binding [GO:0003729]; structural constituent of ribosome [GO:0003735]	20210409_ALS_XL_F60.raw	17984
Intra	Cre02.g080650.t1.2	Cre02.g080650.t1.2	Heat shock protein 90B	Heat shock protein 90B	166	110	NLGTIAKSGTSAFLEQMQK	1×Oxidation [M17]; 1×DSSO [K7]	ELISNASDALDKIR	1×DSSO [K12]	139.68	98.96	1	FALSE	A0A220IUF1	A0A220IUF1	protein folding [GO:0006457]; protein secretion [GO:0009306]; regulation of meristem growth [GO:0010075]; regulation of meristem structural organization [GO:0009934]; response to cadmium ion [GO:0046686]; response to cold [GO:0009409]; response to endoplasmic reticulum stress [GO:0034976]; response to salt stress [GO:0009651]; response to water deprivation [GO:0009414]	chloroplast [GO:0009507]; endoplasmic reticulum [GO:0005783]; mitochondrion [GO:0005739]; nucleus [GO:0005634]; perinuclear region of cytoplasm [GO:0048471]; plasma membrane [GO:0005886]; plasmodesma [GO:0009506]; vacuolar membrane [GO:0005774]	ATPase activity [GO:0016887]; ATP binding [GO:0005524]; unfolded protein binding [GO:0051082]	protein folding [GO:0006457]; protein secretion [GO:0009306]; regulation of meristem growth [GO:0010075]; regulation of meristem structural organization [GO:0009934]; response to cadmium ion [GO:0046686]; response to cold [GO:0009409]; response to endoplasmic reticulum stress [GO:0034976]; response to salt stress [GO:0009651]; response to water deprivation [GO:0009414]	chloroplast [GO:0009507]; endoplasmic reticulum [GO:0005783]; mitochondrion [GO:0005739]; nucleus [GO:0005634]; perinuclear region of cytoplasm [GO:0048471]; plasma membrane [GO:0005886]; plasmodesma [GO:0009506]; vacuolar membrane [GO:0005774]	ATPase activity [GO:0016887]; ATP binding [GO:0005524]; unfolded protein binding [GO:0051082]	20210409_ALS_XL_F48.raw	41416
Inter	Cre12.g532550.t1.1	Cre17.g701200.t1.2	Cytosolic 80S ribosomal protein L13a	Cytosolic 80S ribosomal protein L14	172	95	SKAAAQVKA	1×DSSO [K8]	LAKQAAK	1×DSSO [K3]	78.65	32.58	1	FALSE	A0A2K3D4X3	A8IQE3	negative regulation of translation [GO:0017148]; translation [GO:0006412]	cytosolic large ribosomal subunit [GO:0022625]; ribosome [GO:0005840]	mRNA binding [GO:0003729]; structural constituent of ribosome [GO:0003735]	ribosomal large subunit biogenesis [GO:0042273]; translation [GO:0006412]	cytosolic large ribosomal subunit [GO:0022625]	RNA binding [GO:0003723]; structural constituent of ribosome [GO:0003735]	20210409_ALS_XL_F56.raw	8190
Inter	Cre02.g078100.t1.1	Cre06.g278500.t1.1	Eukaryotic initiation factor, eIF-5B	tRNA (guanine-N1)-methyltransferase	932	88	AEEEKAAAAKK	1×DSSO [K5]	AAKAAKK	1×DSSO [K3]	78.62	6.97	1	FALSE	A0A2K3E0D8	A0A2K3DPJ9	NA	NA	GTPase activity [GO:0003924]; GTP binding [GO:0005525]; translation initiation factor activity [GO:0003743]; tRNA binding [GO:0000049]	mitochondrial tRNA processing [GO:0090646]	mitochondrion [GO:0005739]; nucleus [GO:0005634]	tRNA (guanine-N1-)-methyltransferase activity [GO:0009019]; tRNA binding [GO:0000049]	20210409_ALS_XL_F63.raw	3629
Intra	Cre17.g702500.t1.2	Cre17.g702500.t1.2	conserved chloroplast PsaB RNA binding protein	conserved chloroplast PsaB RNA binding protein	160	138	ALTDCQIKAVPSRR	1×Carbamidomethyl [C5]; 1×DSSO [K8]	ILAQAGAERPEKAR	1×DSSO [K12]	78.6	30.31	1	TRUE	Q7X8Y6	Q7X8Y6	NA	NA	RNA binding [GO:0003723]	NA	NA	RNA binding [GO:0003723]	20210409_ALS_XL_F60.raw	20586
Intra	Cre01.g040000.t1.2	Cre01.g040000.t1.2	Cytosolic 80S ribosomal protein L26	Cytosolic 80S ribosomal protein L26	133	129	GKFTEQDVAMTNVD	1×Oxidation [M10]; 1×DSSO [K2]	AAEKGK	1×DSSO [K4]	78.58	27.05	3	TRUE	A8HMG7	A8HMG7	cytoplasmic translation [GO:0002181]; ribosomal large subunit biogenesis [GO:0042273]	cytosolic large ribosomal subunit [GO:0022625]	RNA binding [GO:0003723]; structural constituent of ribosome [GO:0003735]	cytoplasmic translation [GO:0002181]; ribosomal large subunit biogenesis [GO:0042273]	cytosolic large ribosomal subunit [GO:0022625]	RNA binding [GO:0003723]; structural constituent of ribosome [GO:0003735]	20210409_ALS_XL_F42.raw	17460
Intra	Cre09.g393358.t1.1	Cre09.g393358.t1.1	Hyaluronan / mRNA binding family	Hyaluronan / mRNA binding family	261	253	AAKEAAAASK	1×DSSO [K3]	KAEAER	1×DSSO [K1]	78.58	14.02	1	FALSE	A8J087	A8J087	NA	cytoplasm [GO:0005737]; nucleus [GO:0005634]	RNA binding [GO:0003723]	NA	cytoplasm [GO:0005737]; nucleus [GO:0005634]	RNA binding [GO:0003723]	20210409_ALS_XL_F56.raw	4413
Intra	Cre09.g391097.t2.1	Cre09.g391097.t2.1	Cytosolic 80S ribosomal protein L4	Cytosolic 80S ribosomal protein L4	131	123	AAAAKAAAGPQK	1×DSSO [K5]	KQKAER	1×DSSO [K3]	78.58	29.91	1	FALSE	A8J1A3	A8J1A3	NA	ribosome [GO:0005840]	NA	NA	ribosome [GO:0005840]	NA	20210409_ALS_XL_F60.raw	4666
Intra	Cre06.g284700.t1.2	Cre06.g284700.t1.2	Alanine aminotransferase	Alanine aminotransferase	39	43	APLGIDTINKR	1×DSSO [K10]	VIKSEYAVR	1×DSSO [K3]	78.43	48.28	1	TRUE	A0A2K3DPY9	A0A2K3DPY9	biosynthetic process [GO:0009058]	NA	L-alanine:2-oxoglutarate aminotransferase activity [GO:0004021]; pyridoxal phosphate binding [GO:0030170]	biosynthetic process [GO:0009058]	NA	L-alanine:2-oxoglutarate aminotransferase activity [GO:0004021]; pyridoxal phosphate binding [GO:0030170]	20210409_ALS_XL_F55.raw	26850
Intra	Cre10.g451900.t1.1	Cre10.g451900.t1.1	Threonine synthase	Threonine synthase	41	31	VPLDKAHTFNAK	1×DSSO [K5]	KEAALR	1×DSSO [K1]	78.19	15.8	1	TRUE	A8HZZ1	A8HZZ1	NA	cytoplasm [GO:0005737]	pyridoxal phosphate binding [GO:0030170]; threonine synthase activity [GO:0004795]	NA	cytoplasm [GO:0005737]	pyridoxal phosphate binding [GO:0030170]; threonine synthase activity [GO:0004795]	20210409_ALS_XL_F59.raw	19655
Intra	Cre10.g439900.t1.2	Cre10.g439900.t1.2	ER-located HSP110/SSE-like protein	ER-located HSP110/SSE-like protein	840	847	RAEELELRPKLLETVR	1×DSSO [K10]	KQLELK	1×DSSO [K1]	78.19	20.69	9	FALSE	A0A2K3DAF7	A0A2K3DAF7	cellular response to hypoxia [GO:0071456]; negative regulation of hypoxia-induced intrinsic apoptotic signaling pathway [GO:1903298]	endoplasmic reticulum chaperone complex [GO:0034663]	ATPase activity [GO:0016887]; ATP binding [GO:0005524]	cellular response to hypoxia [GO:0071456]; negative regulation of hypoxia-induced intrinsic apoptotic signaling pathway [GO:1903298]	endoplasmic reticulum chaperone complex [GO:0034663]	ATPase activity [GO:0016887]; ATP binding [GO:0005524]	20210409_ALS_XL_F63.raw	38867
Intra	Cre09.g392467.t1.1	Cre09.g392467.t1.1	copper chaperone	copper chaperone	64	60	KAELVSS	1×DSSO [K1]	VAKTGK	1×DSSO [K3]	78.16	24.68	1	TRUE	Q9FYV4	Q9FYV4	NA	NA	metal ion binding [GO:0046872]	NA	NA	metal ion binding [GO:0046872]	20210409_ALS_XL_F44.raw	11144
Inter	Cre06.g279150.t1.2	Cre12.g515950.t1.2	Aspartyl-tRNA synthetase	None	27	508	SEADLASLSVEDSQASVGSKPDAEAKK	1×Acetyl [S1]; 1×DSSO [K26]	AKAEAAK	1×DSSO [K2]	78.16	78.16	1	FALSE	A8J1X8	A0A2K3D3R9	aspartyl-tRNA aminoacylation [GO:0006422]	aminoacyl-tRNA synthetase multienzyme complex [GO:0017101]; cytosol [GO:0005829]	aspartate-tRNA ligase activity [GO:0004815]; ATP binding [GO:0005524]; RNA binding [GO:0003723]	NA	NA	NA	20210409_ALS_XL_F45.raw	23969
Intra	Cre06.g279150.t1.2	Cre06.g279150.t1.2	Aspartyl-tRNA synthetase	Aspartyl-tRNA synthetase	21	31	SEADLASLSVEDSQASVGSKPDAEAKK	1×Acetyl [S1]; 1×DSSO [K20]	AAKAAEK	1×DSSO [K3]	78.16	78.16	2	TRUE	A8J1X8	A8J1X8	aspartyl-tRNA aminoacylation [GO:0006422]	aminoacyl-tRNA synthetase multienzyme complex [GO:0017101]; cytosol [GO:0005829]	aspartate-tRNA ligase activity [GO:0004815]; ATP binding [GO:0005524]; RNA binding [GO:0003723]	aspartyl-tRNA aminoacylation [GO:0006422]	aminoacyl-tRNA synthetase multienzyme complex [GO:0017101]; cytosol [GO:0005829]	aspartate-tRNA ligase activity [GO:0004815]; ATP binding [GO:0005524]; RNA binding [GO:0003723]	20210409_ALS_XL_F46.raw	26731
Inter	Cre16.g661050.t1.2	Cre12.g558950.t1.1	Cytosolic 80S ribosomal protein L34	high mobility group	114	462	AQQEKPTK	1×DSSO [K5]	AKAAAPK	1×DSSO [K2]	78.16	106.75	1	TRUE	A8J8P4	A0A2K3D5M1	ribosome biogenesis [GO:0042254]; translation [GO:0006412]	cytosolic large ribosomal subunit [GO:0022625]	structural constituent of ribosome [GO:0003735]	NA	nucleus [GO:0005634]	DNA binding, bending [GO:0008301]	20210409_ALS_XL_F55.raw	4147
Intra	Cre12.g484050.t1.2	Cre12.g484050.t1.2	Cytosolic 80S ribosomal protein L36	Cytosolic 80S ribosomal protein L36	1	18	VATGLAVGLNK	1×DSSO [V1]	GHVVTKR	1×DSSO [K6]	78.16	24.45	1	TRUE	A8JHU2	A8JHU2	cytoplasmic translation [GO:0002181]	cytosolic large ribosomal subunit [GO:0022625]	structural constituent of ribosome [GO:0003735]	cytoplasmic translation [GO:0002181]	cytosolic large ribosomal subunit [GO:0022625]	structural constituent of ribosome [GO:0003735]	20210409_ALS_XL_F56.raw	23276
Inter	Cre13.g564250.t1.2	Cre03.g190100.t1.1	Eukaryotic translation initiation factor 3, subunit A	Eukaryotic translation initiation factor 3, subunit B	694	634	LAKNMDHLER	1×Oxidation [M5]; 1×DSSO [K3]	NLKQYTK	1×DSSO [K3]	78.16	49.95	1	TRUE	A0A2K3CZ51	A8IRV6	formation of cytoplasmic translation initiation complex [GO:0001732]; translation reinitiation [GO:0002188]	eukaryotic 43S preinitiation complex [GO:0016282]; eukaryotic 48S preinitiation complex [GO:0033290]; eukaryotic translation initiation factor 3 complex, eIF3e [GO:0071540]; eukaryotic translation initiation factor 3 complex, eIF3m [GO:0071541]; multi-eIF complex [GO:0043614]	mRNA binding [GO:0003729]; translation initiation factor activity [GO:0003743]	formation of cytoplasmic translation initiation complex [GO:0001732]; translational initiation [GO:0006413]	eukaryotic 43S preinitiation complex [GO:0016282]; eukaryotic 48S preinitiation complex [GO:0033290]; eukaryotic translation initiation factor 3 complex [GO:0005852]	translation initiation factor activity [GO:0003743]; translation initiation factor binding [GO:0031369]	20210409_ALS_XL_F60.raw	15757
Inter	Cre16.g676314.t1.1	Cre13.g564250.t1.2	Eukaryotic translation initiation factor 3, subunit H	Eukaryotic translation initiation factor 3, subunit A	10	590	MEAIAPKPHKELVK	1×Acetyl [M1]; 1×Oxidation [M1]; 1×DSSO [K10]	KKEEAER	1×DSSO [K1]	78.16	78.16	1	FALSE	A8JBC8	A0A2K3CZ51	formation of cytoplasmic translation initiation complex [GO:0001732]	cytosol [GO:0005829]; eukaryotic 43S preinitiation complex [GO:0016282]; eukaryotic 48S preinitiation complex [GO:0033290]; eukaryotic translation initiation factor 3 complex [GO:0005852]; polysomal ribosome [GO:0042788]	isopeptidase activity [GO:0070122]; metallopeptidase activity [GO:0008237]; translation initiation factor activity [GO:0003743]	formation of cytoplasmic translation initiation complex [GO:0001732]; translation reinitiation [GO:0002188]	eukaryotic 43S preinitiation complex [GO:0016282]; eukaryotic 48S preinitiation complex [GO:0033290]; eukaryotic translation initiation factor 3 complex, eIF3e [GO:0071540]; eukaryotic translation initiation factor 3 complex, eIF3m [GO:0071541]; multi-eIF complex [GO:0043614]	mRNA binding [GO:0003729]; translation initiation factor activity [GO:0003743]	20210409_ALS_XL_F61.raw	14588
Intra	Cre08.g372450.t1.2	Cre08.g372450.t1.2	Photosystem II Oxygen Evolution Enhancer protein 3	Photosystem II Oxygen Evolution Enhancer protein 3	188	102	KLEITKAK	1×DSSO [K6]	VKESEAR	1×DSSO [K2]	78	37.7	1	TRUE	A8JEV1	A8JEV1	photosynthetic electron transport chain [GO:0009767]	chloroplast [GO:0009507]; extrinsic component of membrane [GO:0019898]; photosystem II oxygen evolving complex [GO:0009654]	calcium ion binding [GO:0005509]; electron transporter, transferring electrons within the cyclic electron transport pathway of photosynthesis activity [GO:0045156]	photosynthetic electron transport chain [GO:0009767]	chloroplast [GO:0009507]; extrinsic component of membrane [GO:0019898]; photosystem II oxygen evolving complex [GO:0009654]	calcium ion binding [GO:0005509]; electron transporter, transferring electrons within the cyclic electron transport pathway of photosynthesis activity [GO:0045156]	20210409_ALS_XL_F60.raw	11310
Intra	Cre17.g731350.t1.1	Cre17.g731350.t1.1	Short-chain dehydrogenase/reductase	Short-chain dehydrogenase/reductase	96	103	DIEQGKAAVAK	1×DSSO [K6]	IKEAAPGAR	1×DSSO [K2]	77.94	29.77	1	TRUE	A0A2K3CQZ5	A0A2K3CQZ5	NA	membrane [GO:0016020]	NA	NA	membrane [GO:0016020]	NA	20210409_ALS_XL_F54.raw	15006
Intra	Cre01.g033550.t1.2	Cre01.g033550.t1.2	Protein disulfide isomerase	Protein disulfide isomerase	83	151	LGELVAADPKLK	1×DSSO [K10]	LAADKGFAR	1×DSSO [K5]	77.94	101.72	1	TRUE	A8HQT1	A8HQT1	NA	endoplasmic reticulum [GO:0005783]	protein disulfide isomerase activity [GO:0003756]	NA	endoplasmic reticulum [GO:0005783]	protein disulfide isomerase activity [GO:0003756]	20210409_ALS_XL_F54.raw	29600
Inter	Cre13.g568650.t1.2	Cre12.g529651.t1.1	Cytosolic 80S ribosomal protein S3a	Cytosolic 80S ribosomal protein L7a	222	185	VLKAPKFDITK	1×DSSO [K6]	AIAKELAQR	1×DSSO [K4]	77.94	42.06	2	TRUE	A8HS48	A0A2K3D4Q4	translation [GO:0006412]	cytosol [GO:0005829]; cytosolic small ribosomal subunit [GO:0022627]	structural constituent of ribosome [GO:0003735]	maturation of LSU-rRNA [GO:0000470]	cytosolic large ribosomal subunit [GO:0022625]	RNA binding [GO:0003723]	20210409_ALS_XL_F58.raw	27574
Inter	Cre08.g359350.t1.2	Cre07.g330400.t1.1	Biotin carboxylase	Six-transmembrane domain potassium channel alpha subunit	158	877	LMGDKSTAR	1×DSSO [K5]	KLGSRNGR	1×DSSO [K1]	77.94	5.89	1	TRUE	A0A2K3DGE7	A0A2K3DJW6	fatty acid biosynthetic process [GO:0006633]; malonyl-CoA biosynthetic process [GO:2001295]	NA	acetyl-CoA carboxylase activity [GO:0003989]; ATP binding [GO:0005524]; biotin carboxylase activity [GO:0004075]; metal ion binding [GO:0046872]	potassium ion transmembrane transport [GO:0071805]; regulation of ion transmembrane transport [GO:0034765]	integral component of membrane [GO:0016021]; voltage-gated potassium channel complex [GO:0008076]	voltage-gated potassium channel activity [GO:0005249]	20210409_ALS_XL_F57.raw	10907
Intra	Cre10.g456200.t1.2	Cre10.g456200.t1.2	Cytosolic 80S ribosomal protein S24	Cytosolic 80S ribosomal protein S24	82	100	STGFGLIYDDLKAAKQFEPK	1×DSSO [K12]	NGLEKKVEK	1×DSSO [K5]	77.94	77.94	1	TRUE	A8I0I1	A8I0I1	translation [GO:0006412]	ribosome [GO:0005840]	structural constituent of ribosome [GO:0003735]	translation [GO:0006412]	ribosome [GO:0005840]	structural constituent of ribosome [GO:0003735]	20210409_ALS_XL_F60.raw	46347
Intra	Cre01.g040000.t1.2	Cre01.g040000.t1.2	Cytosolic 80S ribosomal protein L26	Cytosolic 80S ribosomal protein L26	112	115	LKLDKDR	1×DSSO [K5]	KALLER	1×DSSO [K1]	77.93	20.21	2	TRUE	A8HMG7	A8HMG7	cytoplasmic translation [GO:0002181]; ribosomal large subunit biogenesis [GO:0042273]	cytosolic large ribosomal subunit [GO:0022625]	RNA binding [GO:0003723]; structural constituent of ribosome [GO:0003735]	cytoplasmic translation [GO:0002181]; ribosomal large subunit biogenesis [GO:0042273]	cytosolic large ribosomal subunit [GO:0022625]	RNA binding [GO:0003723]; structural constituent of ribosome [GO:0003735]	20210409_ALS_XL_F63.raw	20678
Inter	Cre12.g498450.t1.2	Cre12.g521200.t1.2	Regulator of chromosome condensation (RCC1) family protein	DNA replication factor C complex subunit 1	16	235	AKAKEEAADKPVEEPKPK	1×DSSO [K4]	AKATPK	1×DSSO [K2]	77.93	20.63	1	TRUE	A8JGJ7	A0A2K3D450	Ran protein signal transduction [GO:0031291]; regulation of mitotic spindle assembly [GO:1901673]	cytoplasm [GO:0005737]	chromatin binding [GO:0003682]	DNA repair [GO:0006281]; DNA replication [GO:0006260]	DNA replication factor C complex [GO:0005663]; nucleus [GO:0005634]	ATP binding [GO:0005524]; DNA binding [GO:0003677]; DNA clamp loader activity [GO:0003689]	20210409_ALS_XL_F63.raw	6904
Intra	Cre02.g076300.t1.1	Cre02.g076300.t1.1	Uroporphyrinogen decarboxylase	Uroporphyrinogen decarboxylase	79	72	ELAKKHPSFR	1×DSSO [K4]	YQKSYR	1×DSSO [K3]	77.93	77.93	2	TRUE	A0A2K3E068	A0A2K3E068	protoporphyrinogen IX biosynthetic process [GO:0006782]	NA	uroporphyrinogen decarboxylase activity [GO:0004853]	protoporphyrinogen IX biosynthetic process [GO:0006782]	NA	uroporphyrinogen decarboxylase activity [GO:0004853]	20210409_ALS_XL_F67.raw	15382
Intra	Cre03.g146527.t1.1	Cre03.g146527.t1.1	Glutamic-gamma-semialdehyde dehydrogenase	Glutamic-gamma-semialdehyde dehydrogenase	10	1	FGKPVAFR	1×DSSO [K3]	GLLVDR	1×DSSO [G1]	77.91	110.25	1	TRUE	A0A2K3DVH9	A0A2K3DVH9	L-proline biosynthetic process [GO:0055129]	NA	glutamate-5-semialdehyde dehydrogenase activity [GO:0004350]	L-proline biosynthetic process [GO:0055129]	NA	glutamate-5-semialdehyde dehydrogenase activity [GO:0004350]	20210409_ALS_XL_F45.raw	34463
Intra	Cre11.g467770.t1.1	Cre11.g467770.t1.1	Phosphoglycerate kinase, chloroplast precursor	Phosphoglycerate kinase, chloroplast precursor	91	135	ADLNVPLDKATLAITDDTR	1×DSSO [K9]	GGPEDKYR	1×DSSO [K6]	77.91	85.21	2	TRUE	A8JC04	A8JC04	gluconeogenesis [GO:0006094]; glycolytic process [GO:0006096]	cytosol [GO:0005829]	ADP binding [GO:0043531]; ATP binding [GO:0005524]; phosphoglycerate kinase activity [GO:0004618]	gluconeogenesis [GO:0006094]; glycolytic process [GO:0006096]	cytosol [GO:0005829]	ADP binding [GO:0043531]; ATP binding [GO:0005524]; phosphoglycerate kinase activity [GO:0004618]	20210409_ALS_XL_F54.raw	38680
Intra	Cre01.g002300.t1.2	Cre01.g002300.t1.2	Cyclophilin	Cyclophilin	44	51	ALCTGEKGVGR	1×Carbamidomethyl [C3]; 1×DSSO [K7]	SGKPLHFK	1×DSSO [K3]	77.91	38.93	1	TRUE	A8JD64	A8JD64	protein folding [GO:0006457]; protein peptidyl-prolyl isomerization [GO:0000413]	cytoplasm [GO:0005737]	cyclosporin A binding [GO:0016018]; peptidyl-prolyl cis-trans isomerase activity [GO:0003755]	protein folding [GO:0006457]; protein peptidyl-prolyl isomerization [GO:0000413]	cytoplasm [GO:0005737]	cyclosporin A binding [GO:0016018]; peptidyl-prolyl cis-trans isomerase activity [GO:0003755]	20210409_ALS_XL_F60.raw	19584
Inter	Cre05.g242300.t1.2	Cre12.g510450.t1.2	Eukaryotic translation initiation factor 3, subunit D	Cytosolic 80S ribosomal protein S28	416	19	GAVVLSETKNNKFK	1×DSSO [K9]	VKFLDDQNR	1×DSSO [K2]	77.76	77.76	1	TRUE	A0A2K3DSI2	A8IKP1	translational initiation [GO:0006413]	eukaryotic translation initiation factor 3 complex [GO:0005852]	translation initiation factor activity [GO:0003743]	NA	NA	NA	20210409_ALS_XL_F58.raw	26323
Inter	Cre08.g360900.t1.2	Cre13.g568650.t1.2	Cytosolic 80S ribosomal protein S15	Cytosolic 80S ribosomal protein S3a	9	219	ADAAGDKKR	1×Acetyl [A1]; 1×DSSO [K8]	VLKAPK	1×DSSO [K3]	77.72	77.72	1	TRUE	A8J493	A8HS48	ribosomal small subunit assembly [GO:0000028]; translation [GO:0006412]	cytosolic small ribosomal subunit [GO:0022627]	RNA binding [GO:0003723]; structural constituent of ribosome [GO:0003735]	translation [GO:0006412]	cytosol [GO:0005829]; cytosolic small ribosomal subunit [GO:0022627]	structural constituent of ribosome [GO:0003735]	20210409_ALS_XL_F56.raw	10550
Intra	Cre14.g614900.t2.1	Cre14.g614900.t2.1	Glutaminyl-tRNA synthetase	Glutaminyl-tRNA synthetase	639	798	LKDEKDYYGLAPGK	1×DSSO [K5]	ESKPVSLKK	1×DSSO [K9]	77.72	77.72	1	FALSE	A0A2K3CXJ2	A0A2K3CXJ2	glutaminyl-tRNA aminoacylation [GO:0006425]	cytoplasm [GO:0005737]	ATP binding [GO:0005524]; glutamine-tRNA ligase activity [GO:0004819]	glutaminyl-tRNA aminoacylation [GO:0006425]	cytoplasm [GO:0005737]	ATP binding [GO:0005524]; glutamine-tRNA ligase activity [GO:0004819]	20210409_ALS_XL_F61.raw	23165
Inter	Cre06.g275100.t1.2	Cre13.g567450.t1.2	Nucleolin	Histone H1	137	144	KEESSDDDDDDDESDDDDSEEEAPK	1×DSSO [K1]	KAAPK	1×DSSO [K1]	77.53	9.68	1	FALSE	A0A2K3DNK6	A8HRZ0	NA	ribonucleoprotein complex [GO:1990904]	RNA binding [GO:0003723]	chromosome condensation [GO:0030261]; negative regulation of chromatin silencing [GO:0031936]; negative regulation of DNA recombination [GO:0045910]; nucleosome assembly [GO:0006334]; nucleosome positioning [GO:0016584]	nucleosome [GO:0000786]; nucleus [GO:0005634]	double-stranded DNA binding [GO:0003690]; nucleosomal DNA binding [GO:0031492]	20210409_ALS_XL_F53.raw	7696
Intra	Cre03.g213537.t1.1	Cre03.g213537.t1.1	basic transcription factor 3	basic transcription factor 3	18	26	TGGKGSVR	1×DSSO [K4]	KAVHK	1×DSSO [K1]	77.53	37.2	3	TRUE	A8JBX6	A8JBX6	NA	cytosol [GO:0005829]; nascent polypeptide-associated complex [GO:0005854]; polysomal ribosome [GO:0042788]	mRNA binding [GO:0003729]	NA	cytosol [GO:0005829]; nascent polypeptide-associated complex [GO:0005854]; polysomal ribosome [GO:0042788]	mRNA binding [GO:0003729]	20210409_ALS_XL_F62.raw	4395
Intra	Cre17.g734500.t1.2	Cre17.g734500.t1.2	Vacuolar ATP synthase subunit E	Vacuolar ATP synthase subunit E	65	53	KEGQVEVKK	1×DSSO [K8]	KEYER	1×DSSO [K1]	77.53	27.45	1	FALSE	A8IW47	A8IW47	NA	proton-transporting two-sector ATPase complex, catalytic domain [GO:0033178]	proton-exporting ATPase activity, phosphorylative mechanism [GO:0008553]; proton-transporting ATPase activity, rotational mechanism [GO:0046961]	NA	proton-transporting two-sector ATPase complex, catalytic domain [GO:0033178]	proton-exporting ATPase activity, phosphorylative mechanism [GO:0008553]; proton-transporting ATPase activity, rotational mechanism [GO:0046961]	20210409_ALS_XL_F62.raw	9119
Intra	Cre06.g261450.t1.2	Cre06.g261450.t1.2	High mobility group protein	High mobility group protein	42	50	APPKEKPAKK	1×DSSO [K6]	APAKK	1×DSSO [K4]	77.53	77.53	1	FALSE	A8HXE1	A8HXE1	NA	nucleus [GO:0005634]	DNA binding, bending [GO:0008301]	NA	nucleus [GO:0005634]	DNA binding, bending [GO:0008301]	20210409_ALS_XL_F64.raw	4118
Intra	Cre13.g568900.t1.2	Cre13.g568900.t1.2	Cytosolic 80S ribosomal protein L17	Cytosolic 80S ribosomal protein L17	160	38	SAGVKAEKDTK	1×DSSO [K5]	KMSLNK	1×Oxidation [M2]; 1×DSSO [K1]	77.44	77.44	1	TRUE	A8HS59	A8HS59	cytoplasmic translation [GO:0002181]	cytosolic large ribosomal subunit [GO:0022625]	structural constituent of ribosome [GO:0003735]	cytoplasmic translation [GO:0002181]	cytosolic large ribosomal subunit [GO:0022625]	structural constituent of ribosome [GO:0003735]	20210409_ALS_XL_F59.raw	6112
Intra	Cre08.g362450.t1.2	Cre08.g362450.t1.2	Alpha-amylase	Alpha-amylase	283	276	SPTEKLLETLKPPTPMR	1×Oxidation [M16]; 1×DSSO [K5]	NLATEPEKPK	1×DSSO [K8]	77.33	35.01	1	TRUE	A0A2K3DGK5	A0A2K3DGK5	carbohydrate metabolic process [GO:0005975]	NA	alpha-amylase activity [GO:0004556]; alpha-amylase activity (releasing maltohexaose) [GO:0103025]; calcium ion binding [GO:0005509]	carbohydrate metabolic process [GO:0005975]	NA	alpha-amylase activity [GO:0004556]; alpha-amylase activity (releasing maltohexaose) [GO:0103025]; calcium ion binding [GO:0005509]	20210409_ALS_XL_F56.raw	34288
Intra	Cre12.g514500.t1.2	Cre12.g514500.t1.2	Cytosolic 80S ribosomal protein S11	Cytosolic 80S ribosomal protein S11	46	24	TPKEAIEGHYIDKK	1×DSSO [K3]	EKKAPGK	1×DSSO [K2]	77.3	77.3	1	TRUE	A8JHC3	A8JHC3	translation [GO:0006412]	cytosolic small ribosomal subunit [GO:0022627]	structural constituent of ribosome [GO:0003735]	translation [GO:0006412]	cytosolic small ribosomal subunit [GO:0022627]	structural constituent of ribosome [GO:0003735]	20210409_ALS_XL_F67.raw	15746
Intra	Cre16.g660150.t1.2	Cre16.g660150.t1.2	Ribosomal protein S10p/S20e family protein	Ribosomal protein S10p/S20e family protein	43	4	VCADLIKGAK	1×Carbamidomethyl [C2]; 1×DSSO [K7]	ATKAGVEK	1×Acetyl [A1]; 1×DSSO [K3]	77.3	18.75	2	TRUE	A0A2K3CTK0	A0A2K3CTK0	translation [GO:0006412]	cytosolic small ribosomal subunit [GO:0022627]; small ribosomal subunit [GO:0015935]	structural constituent of ribosome [GO:0003735]	translation [GO:0006412]	cytosolic small ribosomal subunit [GO:0022627]; small ribosomal subunit [GO:0015935]	structural constituent of ribosome [GO:0003735]	20210409_ALS_XL_F39.raw	19874
Inter	Cre06.g275100.t1.2	Cre09.g400000.t1.1	Nucleolin	None	119	977	KGKPAAAPAAAAK	1×DSSO [K1]	KGAAAVVAAK	1×DSSO [K1]	77.3	77.3	1	TRUE	A0A2K3DNK6	A0A2K3DCW4	NA	ribonucleoprotein complex [GO:1990904]	RNA binding [GO:0003723]	rRNA processing [GO:0006364]	nucleus [GO:0005634]; preribosome, large subunit precursor [GO:0030687]	NA	20210409_ALS_XL_F60.raw	5111
Intra	Cre16.g688050.t1.1	Cre16.g688050.t1.1	eukaryotic translation initiation factor 4B1	eukaryotic translation initiation factor 4B1	357	349	GVDPIKEALR	1×DSSO [K6]	EEVLKEK	1×DSSO [K5]	77.2	32.61	3	TRUE	A0A2K3CUK8	A0A2K3CUK8	NA	NA	mRNA binding [GO:0003729]; translation initiation factor activity [GO:0003743]	NA	NA	mRNA binding [GO:0003729]; translation initiation factor activity [GO:0003743]	20210409_ALS_XL_F55.raw	27653
Intra	Cre02.g088200.t1.2	Cre02.g088200.t1.2	Protein disulfide isomerase 1	Protein disulfide isomerase 1	498	491	FIKTNAK	1×DSSO [K3]	SLKSLTK	1×DSSO [K3]	77.2	40.73	2	TRUE	O48949	O48949	protein folding [GO:0006457]; response to endoplasmic reticulum stress [GO:0034976]	endoplasmic reticulum [GO:0005783]; endoplasmic reticulum lumen [GO:0005788]	protein disulfide isomerase activity [GO:0003756]	protein folding [GO:0006457]; response to endoplasmic reticulum stress [GO:0034976]	endoplasmic reticulum [GO:0005783]; endoplasmic reticulum lumen [GO:0005788]	protein disulfide isomerase activity [GO:0003756]	20210409_ALS_XL_F56.raw	17771
Intra	Cre13.g585100.t1.2	Cre13.g585100.t1.2	ENTH/VHS/GAT family protein	ENTH/VHS/GAT family protein	13	4	EGLRDIKQGVLEK	1×DSSO [K7]	AAKIK	1×Acetyl [A1]; 1×DSSO [K3]	76.96	30.5	2	FALSE	A0A2K3D0P9	A0A2K3D0P9	intracellular protein transport [GO:0006886]	NA	NA	intracellular protein transport [GO:0006886]	NA	NA	20210409_ALS_XL_F55.raw	30401
Intra	Cre06.g264350.t1.2	Cre06.g264350.t1.2	Chloroplast ribosomal protein L13	Chloroplast ribosomal protein L13	211	223	EISIKPKNGPGAAVLK	1×DSSO [K7]	AAKAQ	1×DSSO [K3]	76.96	59.21	1	TRUE	A8HWZ6	A8HWZ6	negative regulation of translation [GO:0017148]; translation [GO:0006412]	mitochondrial large ribosomal subunit [GO:0005762]; ribosome [GO:0005840]	mRNA binding [GO:0003729]; structural constituent of ribosome [GO:0003735]	negative regulation of translation [GO:0017148]; translation [GO:0006412]	mitochondrial large ribosomal subunit [GO:0005762]; ribosome [GO:0005840]	mRNA binding [GO:0003729]; structural constituent of ribosome [GO:0003735]	20210409_ALS_XL_F54.raw	21071
Inter	Cre06.g294950.t1.1	Cre04.g227000.t1.1	Enoyl-[acyl-carrier-protein] reductase	DNA mismatch repair protein	176	466	YAGNKAWTVSEVAESVK	1×DSSO [K5]	GEVDVNVTPDKR	1×DSSO [K11]	76.81	42.24	1	TRUE	A0A2K3DQI2	A0A2K3DUP7	fatty acid biosynthetic process [GO:0006633]	NA	enoyl-[acyl-carrier-protein] reductase (NADH) activity [GO:0004318]	mismatch repair [GO:0006298]	mismatch repair complex [GO:0032300]; MutLalpha complex [GO:0032389]	ATPase activity [GO:0016887]; ATP binding [GO:0005524]; mismatched DNA binding [GO:0030983]	20210409_ALS_XL_F52.raw	34919
Intra	Cre07.g344400.t1.2	Cre07.g344400.t1.2	D-3-phosphoglycerate dehydrogenase	D-3-phosphoglycerate dehydrogenase	212	216	EENMDYDKVAKR	1×Oxidation [M4]; 1×DSSO [K11]	IEKDKAK	1×DSSO [K3]	76.81	26.5	1	FALSE	A0A2K3DKV5	A0A2K3DKV5	NA	NA	NAD binding [GO:0051287]; oxidoreductase activity, acting on the CH-OH group of donors, NAD or NADP as acceptor [GO:0016616]	NA	NA	NAD binding [GO:0051287]; oxidoreductase activity, acting on the CH-OH group of donors, NAD or NADP as acceptor [GO:0016616]	20210409_ALS_XL_F64.raw	11603
Inter	Cre02.g088200.t1.2	Cre10.g442000.t1.2	Protein disulfide isomerase 1	(1 of 1) K14557 - U3 small nucleolar RNA-associated protein 6 (UTP6)	428	32	KLEPIYK	1×DSSO [K1]	KIVQK	1×DSSO [K1]	76.73	8.88	1	TRUE	O48949	A0A2K3DAK5	protein folding [GO:0006457]; response to endoplasmic reticulum stress [GO:0034976]	endoplasmic reticulum [GO:0005783]; endoplasmic reticulum lumen [GO:0005788]	protein disulfide isomerase activity [GO:0003756]	maturation of SSU-rRNA from tricistronic rRNA transcript (SSU-rRNA, 5.8S rRNA, LSU-rRNA) [GO:0000462]	Pwp2p-containing subcomplex of 90S preribosome [GO:0034388]; small-subunit processome [GO:0032040]	snoRNA binding [GO:0030515]	20210409_ALS_XL_F62.raw	14700
Intra	Cre17.g720250.t1.2	Cre17.g720250.t1.2	Light-harvesting minor chlorophyll a/b binding protein of photosystem II	Light-harvesting minor chlorophyll a/b binding protein of photosystem II	21	30	KAGTTATKPAPKATTK	1×DSSO [K8]	KVATSTGTR	1×DSSO [K1]	76.59	76.59	1	TRUE	A8J6D1	A8J6D1	photosynthesis, light harvesting in photosystem I [GO:0009768]; protein-chromophore linkage [GO:0018298]; response to light stimulus [GO:0009416]	chloroplast envelope [GO:0009941]; chloroplast thylakoid membrane [GO:0009535]; photosystem I [GO:0009522]; photosystem II [GO:0009523]; plastoglobule [GO:0010287]	chlorophyll binding [GO:0016168]	photosynthesis, light harvesting in photosystem I [GO:0009768]; protein-chromophore linkage [GO:0018298]; response to light stimulus [GO:0009416]	chloroplast envelope [GO:0009941]; chloroplast thylakoid membrane [GO:0009535]; photosystem I [GO:0009522]; photosystem II [GO:0009523]; plastoglobule [GO:0010287]	chlorophyll binding [GO:0016168]	20210409_ALS_XL_F60.raw	5653
Intra	Cre17.g701650.t1.2	Cre17.g701650.t1.2	Cytosolic 80S ribosomal protein L27	Cytosolic 80S ribosomal protein L27	120	125	LLEEKFK	1×DSSO [K5]	SGKNR	1×DSSO [K3]	76.42	20.9	1	TRUE	A8IQC1	A8IQC1	translation [GO:0006412]	cytosolic large ribosomal subunit [GO:0022625]	structural constituent of ribosome [GO:0003735]	translation [GO:0006412]	cytosolic large ribosomal subunit [GO:0022625]	structural constituent of ribosome [GO:0003735]	20210409_ALS_XL_F58.raw	16113
Intra	Cre08.g382500.t1.2	Cre08.g382500.t1.2	Cytosolic 80S ribosomal protein S25	Cytosolic 80S ribosomal protein S25	23	9	ALAAANSSKGKR	1×DSSO [K11]	SKEAK	1×DSSO [K2]	76.42	76.42	1	TRUE	A8IZ36	A8IZ36	NA	cytosolic small ribosomal subunit [GO:0022627]	structural constituent of ribosome [GO:0003735]	NA	cytosolic small ribosomal subunit [GO:0022627]	structural constituent of ribosome [GO:0003735]	20210409_ALS_XL_F60.raw	4961
Intra	Cre04.g215850.t1.2	Cre04.g215850.t1.2	Importin alpha	Importin alpha	14	10	KGIDAEEAR	1×DSSO [K1]	KKEYK	1×DSSO [K2]	76.42	76.42	1	TRUE	A8J9Q1	A8J9Q1	NLS-bearing protein import into nucleus [GO:0006607]	cytoplasm [GO:0005737]; nucleus [GO:0005634]	nuclear import signal receptor activity [GO:0061608]; nuclear localization sequence binding [GO:0008139]	NLS-bearing protein import into nucleus [GO:0006607]	cytoplasm [GO:0005737]; nucleus [GO:0005634]	nuclear import signal receptor activity [GO:0061608]; nuclear localization sequence binding [GO:0008139]	20210409_ALS_XL_F63.raw	9926
Intra	Cre06.g308850.t1.2	Cre06.g308850.t1.2	hypothetical eIF3-like protein	hypothetical eIF3-like protein	77	73	KFREER	1×DSSO [K1]	KKEEK	1×DSSO [K2]	76.42	76.42	2	FALSE	A0A2K3DRI2	A0A2K3DRI2	NA	eukaryotic translation initiation factor 3 complex [GO:0005852]	translation initiation factor activity [GO:0003743]	NA	eukaryotic translation initiation factor 3 complex [GO:0005852]	translation initiation factor activity [GO:0003743]	20210409_ALS_XL_F69.raw	13967
Intra	gi|41179009|ref|NP_958364.1|	gi|41179009|ref|NP_958364.1|	ATP-dependent Clp protease proteolytic subunit (chloroplast)	ATP-dependent Clp protease proteolytic subunit (chloroplast)	613	608	KENLSGGASAK	1×DSSO [K1]	GKDTVK	1×DSSO [K2]	76.27	28.45	1	TRUE	P42380	P42380	protein quality control for misfolded or incompletely synthesized proteins [GO:0006515]	chloroplast stroma [GO:0009570]; endopeptidase Clp complex [GO:0009368]	ATPase binding [GO:0051117]; ATP-dependent peptidase activity [GO:0004176]; serine-type endopeptidase activity [GO:0004252]	protein quality control for misfolded or incompletely synthesized proteins [GO:0006515]	chloroplast stroma [GO:0009570]; endopeptidase Clp complex [GO:0009368]	ATPase binding [GO:0051117]; ATP-dependent peptidase activity [GO:0004176]; serine-type endopeptidase activity [GO:0004252]	20210409_ALS_XL_F56.raw	7401
Inter	Cre08.g382500.t1.2	Cre06.g290950.t1.2	Cytosolic 80S ribosomal protein S25	Cytosolic 80S ribosomal protein S5	12	190	SKEAKALAAANSSK	1×DSSO [K5]	VAKANR	1×DSSO [K3]	76.27	76.27	1	TRUE	A8IZ36	A0A2K3DQA6	NA	cytosolic small ribosomal subunit [GO:0022627]	structural constituent of ribosome [GO:0003735]	ribosomal small subunit assembly [GO:0000028]; translation [GO:0006412]	cytosolic small ribosomal subunit [GO:0022627]; ribosome [GO:0005840]	mRNA binding [GO:0003729]; rRNA binding [GO:0019843]; structural constituent of ribosome [GO:0003735]	20210409_ALS_XL_F60.raw	9770
Intra	Cre17.g742200.t1.1	Cre17.g742200.t1.1	Regulator of chromosome condensation (RCC1) family protein	Regulator of chromosome condensation (RCC1) family protein	36	33	KEDLDKESQYPNLLRPTR	1×DSSO [K1]	TGGKTR	1×DSSO [K4]	76.27	76.27	1	TRUE	A8JEA7	A8JEA7	NA	NA	NA	NA	NA	NA	20210409_ALS_XL_F62.raw	22893
Intra	Cre06.g308850.t1.2	Cre06.g308850.t1.2	hypothetical eIF3-like protein	hypothetical eIF3-like protein	77	72	KFREER	1×DSSO [K1]	KKEEK	1×DSSO [K1]	76.27	76.27	4	FALSE	A0A2K3DRI2	A0A2K3DRI2	NA	eukaryotic translation initiation factor 3 complex [GO:0005852]	translation initiation factor activity [GO:0003743]	NA	eukaryotic translation initiation factor 3 complex [GO:0005852]	translation initiation factor activity [GO:0003743]	20210409_ALS_XL_F69.raw	12648
Intra	Cre12.g550850.t1.2	Cre12.g550850.t1.2	Photosystem II Oxygen Evolution Enhancer protein 2	Photosystem II Oxygen Evolution Enhancer protein 2	229	225	WFKGAKK	1×DSSO [K3]	IQIGDKR	1×DSSO [K6]	76.05	30.06	4	TRUE	P11471	P11471	photosynthesis [GO:0015979]	extrinsic component of membrane [GO:0019898]; photosystem II oxygen evolving complex [GO:0009654]	calcium ion binding [GO:0005509]	photosynthesis [GO:0015979]	extrinsic component of membrane [GO:0019898]; photosystem II oxygen evolving complex [GO:0009654]	calcium ion binding [GO:0005509]	20210409_ALS_XL_F58.raw	22243
Intra	Cre12.g490350.t1.1	Cre12.g490350.t1.1	1-hydroxy-2-methyl-2-(E)-butenyl 4-diphosphate synthase	1-hydroxy-2-methyl-2-(E)-butenyl 4-diphosphate synthase	130	75	KTFDVINYDDPREFER	1×DSSO [K1]	ITVQGKK	1×DSSO [K6]	76.05	19.96	3	TRUE	A8ILN4	A8ILN4	isopentenyl diphosphate biosynthetic process, methylerythritol 4-phosphate pathway [GO:0019288]; terpenoid biosynthetic process [GO:0016114]	chloroplast [GO:0009507]	4-hydroxy-3-methylbut-2-en-1-yl diphosphate synthase activity [GO:0046429]; 4 iron, 4 sulfur cluster binding [GO:0051539]; iron ion binding [GO:0005506]	isopentenyl diphosphate biosynthetic process, methylerythritol 4-phosphate pathway [GO:0019288]; terpenoid biosynthetic process [GO:0016114]	chloroplast [GO:0009507]	4-hydroxy-3-methylbut-2-en-1-yl diphosphate synthase activity [GO:0046429]; 4 iron, 4 sulfur cluster binding [GO:0051539]; iron ion binding [GO:0005506]	20210409_ALS_XL_F58.raw	31628
Inter	Cre16.g654500.t1.1	Cre13.g564250.t1.2	Eukaryotic translation initiation factor 3, subunit F	Eukaryotic translation initiation factor 3, subunit A	187	590	VGADLMLTGLNDPSPDAKKDSSSK	1×DSSO [K19]	KKEEAER	1×DSSO [K1]	76.05	48.32	1	FALSE	A0A2K3CT30	A0A2K3CZ51	formation of cytoplasmic translation initiation complex [GO:0001732]; translational initiation [GO:0006413]	eukaryotic 43S preinitiation complex [GO:0016282]; eukaryotic 48S preinitiation complex [GO:0033290]; eukaryotic translation initiation factor 3 complex, eIF3m [GO:0071541]	isopeptidase activity [GO:0070122]; metallopeptidase activity [GO:0008237]; translation initiation factor activity [GO:0003743]; translation initiation factor binding [GO:0031369]	formation of cytoplasmic translation initiation complex [GO:0001732]; translation reinitiation [GO:0002188]	eukaryotic 43S preinitiation complex [GO:0016282]; eukaryotic 48S preinitiation complex [GO:0033290]; eukaryotic translation initiation factor 3 complex, eIF3e [GO:0071540]; eukaryotic translation initiation factor 3 complex, eIF3m [GO:0071541]; multi-eIF complex [GO:0043614]	mRNA binding [GO:0003729]; translation initiation factor activity [GO:0003743]	20210409_ALS_XL_F60.raw	25987
Inter	Cre03.g190100.t1.1	Cre13.g564250.t1.2	Eukaryotic translation initiation factor 3, subunit B	Eukaryotic translation initiation factor 3, subunit A	1	830	VQSEEYDPYEVAK	1×DSSO [V1]	KKAEELER	1×DSSO [K1]	75.94	75.94	1	TRUE	A8IRV6	A0A2K3CZ51	formation of cytoplasmic translation initiation complex [GO:0001732]; translational initiation [GO:0006413]	eukaryotic 43S preinitiation complex [GO:0016282]; eukaryotic 48S preinitiation complex [GO:0033290]; eukaryotic translation initiation factor 3 complex [GO:0005852]	translation initiation factor activity [GO:0003743]; translation initiation factor binding [GO:0031369]	formation of cytoplasmic translation initiation complex [GO:0001732]; translation reinitiation [GO:0002188]	eukaryotic 43S preinitiation complex [GO:0016282]; eukaryotic 48S preinitiation complex [GO:0033290]; eukaryotic translation initiation factor 3 complex, eIF3e [GO:0071540]; eukaryotic translation initiation factor 3 complex, eIF3m [GO:0071541]; multi-eIF complex [GO:0043614]	mRNA binding [GO:0003729]; translation initiation factor activity [GO:0003743]	20210409_ALS_XL_F56.raw	22498
Intra	Cre11.g467770.t1.1	Cre11.g467770.t1.1	Phosphoglycerate kinase, chloroplast precursor	Phosphoglycerate kinase, chloroplast precursor	186	135	FYKEEEKNEPEFAK	1×DSSO [K3]	GGPEDKYR	1×DSSO [K6]	75.94	75.94	1	TRUE	A8JC04	A8JC04	gluconeogenesis [GO:0006094]; glycolytic process [GO:0006096]	cytosol [GO:0005829]	ADP binding [GO:0043531]; ATP binding [GO:0005524]; phosphoglycerate kinase activity [GO:0004618]	gluconeogenesis [GO:0006094]; glycolytic process [GO:0006096]	cytosol [GO:0005829]	ADP binding [GO:0043531]; ATP binding [GO:0005524]; phosphoglycerate kinase activity [GO:0004618]	20210409_ALS_XL_F60.raw	21100
Intra	Cre11.g467770.t1.1	Cre11.g467770.t1.1	Phosphoglycerate kinase, chloroplast precursor	Phosphoglycerate kinase, chloroplast precursor	190	135	FYKEEEKNEPEFAK	1×DSSO [K7]	GGPEDKYR	1×DSSO [K6]	75.94	75.94	1	TRUE	A8JC04	A8JC04	gluconeogenesis [GO:0006094]; glycolytic process [GO:0006096]	cytosol [GO:0005829]	ADP binding [GO:0043531]; ATP binding [GO:0005524]; phosphoglycerate kinase activity [GO:0004618]	gluconeogenesis [GO:0006094]; glycolytic process [GO:0006096]	cytosol [GO:0005829]	ADP binding [GO:0043531]; ATP binding [GO:0005524]; phosphoglycerate kinase activity [GO:0004618]	20210409_ALS_XL_F60.raw	21111
Intra	Cre12.g529950.t1.2	Cre12.g529950.t1.2	Eukaryotic translation initiation factor 4, gamma subunit	Eukaryotic translation initiation factor 4, gamma subunit	37	34	KAAAPVVEDKPPKK	1×DSSO [K1]	GLGFGKGK	1×DSSO [K6]	75.68	40.03	1	TRUE	A0A2K3D4R1	A0A2K3D4R1	NA	eukaryotic translation initiation factor 4F complex [GO:0016281]	mRNA binding [GO:0003729]; translation initiation factor activity [GO:0003743]	NA	eukaryotic translation initiation factor 4F complex [GO:0016281]	mRNA binding [GO:0003729]; translation initiation factor activity [GO:0003743]	20210409_ALS_XL_F61.raw	17755
Intra	Cre02.g076350.t1.2	Cre02.g076350.t1.2	Vacuolar ATP synthase subunit B	Vacuolar ATP synthase subunit B	397	20	LMKSAIGEGMTRK	2×Oxidation [M2; M10]; 1×DSSO [K3]	AHVDAAKR	1×DSSO [K7]	74.93	41.32	1	TRUE	A8IA45	A8IA45	ATP metabolic process [GO:0046034]; proton transmembrane transport [GO:1902600]	proton-transporting V-type ATPase, V1 domain [GO:0033180]	ATP binding [GO:0005524]	ATP metabolic process [GO:0046034]; proton transmembrane transport [GO:1902600]	proton-transporting V-type ATPase, V1 domain [GO:0033180]	ATP binding [GO:0005524]	20210409_ALS_XL_F64.raw	12204
Intra	Cre10.g417700.t1.2	Cre10.g417700.t1.2	Cytosolic 80S ribosomal protein L3	Cytosolic 80S ribosomal protein L3	303	379	KGDASHLATTEFDVTKK	1×DSSO [K16]	LKTFGR	1×DSSO [K2]	74.89	13.95	1	TRUE	A8ID84	A8ID84	ribosomal large subunit assembly [GO:0000027]; translation [GO:0006412]	cytosolic large ribosomal subunit [GO:0022625]	RNA binding [GO:0003723]; structural constituent of ribosome [GO:0003735]	ribosomal large subunit assembly [GO:0000027]; translation [GO:0006412]	cytosolic large ribosomal subunit [GO:0022625]	RNA binding [GO:0003723]; structural constituent of ribosome [GO:0003735]	20210409_ALS_XL_F63.raw	25928
Intra	Cre12.g516200.t1.2	Cre12.g516200.t1.2	Ribosomal protein S5/Elongation Factor G/III/V family protein	Ribosomal protein S5/Elongation Factor G/III/V family protein	471	410	TATITKEGCDDAFPMK	1×Carbamidomethyl [C9]; 1×DSSO [K6]	VATGAKVR	1×DSSO [K6]	74.8	24.49	1	TRUE	A8JHX9	A8JHX9	translational elongation [GO:0006414]	ribonucleoprotein complex [GO:1990904]	GTPase activity [GO:0003924]; GTP binding [GO:0005525]; ribosome binding [GO:0043022]; translation elongation factor activity [GO:0003746]	translational elongation [GO:0006414]	ribonucleoprotein complex [GO:1990904]	GTPase activity [GO:0003924]; GTP binding [GO:0005525]; ribosome binding [GO:0043022]; translation elongation factor activity [GO:0003746]	20210409_ALS_XL_F54.raw	22719
Inter	Cre02.g080650.t1.2	Cre03.g194000.t1.1	Heat shock protein 90B	Pre-mRNA splicing factor	477	483	KMAEAEVK	1×DSSO [K1]	KVDAAMKK	1×DSSO [K1]	74.8	22.99	1	TRUE	A0A220IUF1	A0A2K3DYH7	protein folding [GO:0006457]; protein secretion [GO:0009306]; regulation of meristem growth [GO:0010075]; regulation of meristem structural organization [GO:0009934]; response to cadmium ion [GO:0046686]; response to cold [GO:0009409]; response to endoplasmic reticulum stress [GO:0034976]; response to salt stress [GO:0009651]; response to water deprivation [GO:0009414]	chloroplast [GO:0009507]; endoplasmic reticulum [GO:0005783]; mitochondrion [GO:0005739]; nucleus [GO:0005634]; perinuclear region of cytoplasm [GO:0048471]; plasma membrane [GO:0005886]; plasmodesma [GO:0009506]; vacuolar membrane [GO:0005774]	ATPase activity [GO:0016887]; ATP binding [GO:0005524]; unfolded protein binding [GO:0051082]	mRNA splicing, via spliceosome [GO:0000398]; RNA splicing [GO:0008380]	spliceosomal complex [GO:0005681]	pre-mRNA 3'-splice site binding [GO:0030628]; second spliceosomal transesterification activity [GO:0000386]	20210409_ALS_XL_F56.raw	19238
Intra	Cre12.g552200.t1.2	Cre12.g552200.t1.2	Starch phosphorylase	Starch phosphorylase	956	765	ADEVYKNQTEWTR	1×DSSO [K6]	KSVVPR	1×DSSO [K1]	74.59	32.53	1	TRUE	A8IYK1	A8IYK1	glycogen catabolic process [GO:0005980]	cytoplasm [GO:0005737]	glycogen phosphorylase activity [GO:0008184]; linear malto-oligosaccharide phosphorylase activity [GO:0102250]; pyridoxal phosphate binding [GO:0030170]; SHG alpha-glucan phosphorylase activity [GO:0102499]	glycogen catabolic process [GO:0005980]	cytoplasm [GO:0005737]	glycogen phosphorylase activity [GO:0008184]; linear malto-oligosaccharide phosphorylase activity [GO:0102250]; pyridoxal phosphate binding [GO:0030170]; SHG alpha-glucan phosphorylase activity [GO:0102499]	20210409_ALS_XL_F56.raw	21686
Intra	Cre02.g080650.t1.2	Cre02.g080650.t1.2	Heat shock protein 90B	Heat shock protein 90B	541	557	FHTSKTGDQLTTLDEYIGR	1×DSSO [K5]	MKEGQK	1×Oxidation [M1]; 1×DSSO [K2]	74.59	14.38	1	FALSE	A0A220IUF1	A0A220IUF1	protein folding [GO:0006457]; protein secretion [GO:0009306]; regulation of meristem growth [GO:0010075]; regulation of meristem structural organization [GO:0009934]; response to cadmium ion [GO:0046686]; response to cold [GO:0009409]; response to endoplasmic reticulum stress [GO:0034976]; response to salt stress [GO:0009651]; response to water deprivation [GO:0009414]	chloroplast [GO:0009507]; endoplasmic reticulum [GO:0005783]; mitochondrion [GO:0005739]; nucleus [GO:0005634]; perinuclear region of cytoplasm [GO:0048471]; plasma membrane [GO:0005886]; plasmodesma [GO:0009506]; vacuolar membrane [GO:0005774]	ATPase activity [GO:0016887]; ATP binding [GO:0005524]; unfolded protein binding [GO:0051082]	protein folding [GO:0006457]; protein secretion [GO:0009306]; regulation of meristem growth [GO:0010075]; regulation of meristem structural organization [GO:0009934]; response to cadmium ion [GO:0046686]; response to cold [GO:0009409]; response to endoplasmic reticulum stress [GO:0034976]; response to salt stress [GO:0009651]; response to water deprivation [GO:0009414]	chloroplast [GO:0009507]; endoplasmic reticulum [GO:0005783]; mitochondrion [GO:0005739]; nucleus [GO:0005634]; perinuclear region of cytoplasm [GO:0048471]; plasma membrane [GO:0005886]; plasmodesma [GO:0009506]; vacuolar membrane [GO:0005774]	ATPase activity [GO:0016887]; ATP binding [GO:0005524]; unfolded protein binding [GO:0051082]	20210409_ALS_XL_F59.raw	30609
Intra	Cre16.g688050.t1.1	Cre16.g688050.t1.1	eukaryotic translation initiation factor 4B1	eukaryotic translation initiation factor 4B1	486	448	ASPKEGEAGKDAAGAPR	1×DSSO [K4]	EGGGEGGKDGPRGPR	1×DSSO [K8]	74.49	74.49	1	TRUE	A0A2K3CUK8	A0A2K3CUK8	NA	NA	mRNA binding [GO:0003729]; translation initiation factor activity [GO:0003743]	NA	NA	mRNA binding [GO:0003729]; translation initiation factor activity [GO:0003743]	20210409_ALS_XL_F61.raw	9891
Inter	Cre13.g568650.t1.2	Cre10.g420750.t1.2	Cytosolic 80S ribosomal protein S3a	Cytosolic 80S ribosomal protein L30	167	1	KMMEIITR	2×Oxidation [M2; M3]; 1×DSSO [K1]	APATKK	1×DSSO [A1]	74.47	41.54	3	TRUE	A8HS48	A8ICT1	translation [GO:0006412]	cytosol [GO:0005829]; cytosolic small ribosomal subunit [GO:0022627]	structural constituent of ribosome [GO:0003735]	NA	cytosolic large ribosomal subunit [GO:0022625]	RNA binding [GO:0003723]; structural constituent of ribosome [GO:0003735]	20210409_ALS_XL_F41.raw	12208
Inter	Cre10.g423650.t1.2	Cre10.g430150.t1.2	Chloroplast ribosomal protein L11	Photosystem-II repair protein	126	351	GASKPNKENVGQVTR	1×DSSO [K4]	KAASEPK	1×DSSO [K1]	74.24	74.24	1	TRUE	A8ICE4	A1YSB4	translation [GO:0006412]	large ribosomal subunit [GO:0015934]	large ribosomal subunit rRNA binding [GO:0070180]; structural constituent of ribosome [GO:0003735]	NA	integral component of membrane [GO:0016021]; thylakoid [GO:0009579]	NA	20210409_ALS_XL_F59.raw	11795
Intra	Cre10.g428050.t1.1	Cre10.g428050.t1.1	None	None	436	439	EAAESVLAEAAKR	1×DSSO [K12]	TKELDAR	1×DSSO [K2]	73.51	23.47	1	TRUE	A0A2K3D9M9	A0A2K3D9M9	NA	NA	NA	NA	NA	NA	20210409_ALS_XL_F55.raw	24138
Intra	Cre12.g555951.t1.1	Cre12.g555951.t1.1	Riboflavin metabolism-associated deaminase	Riboflavin metabolism-associated deaminase	123	111	EANEAANKQAK	1×DSSO [K8]	AAKEAAR	1×DSSO [K3]	73.48	12.24	1	FALSE	A0A2K3D5U5	A0A2K3D5U5	NA	NA	hydrolase activity [GO:0016787]; zinc ion binding [GO:0008270]	NA	NA	hydrolase activity [GO:0016787]; zinc ion binding [GO:0008270]	20210409_ALS_XL_F56.raw	4843
Inter	Cre12.g545900.t1.2	Cre17.g698000.t1.2	None	Mitochondrial F1F0 ATP synthase, beta subunit	32	510	KMIPDAKDTAIVNAVK	1×Oxidation [M2]; 1×DSSO [K7]	KDESK	1×DSSO [K1]	73.37	29.17	1	TRUE	A0A2K3D6K0	A8IQU3	NA	NA	NA	mitochondrial ATP synthesis coupled proton transport [GO:0042776]	mitochondrial proton-transporting ATP synthase complex [GO:0005753]; proton-transporting ATP synthase complex, catalytic core F(1) [GO:0045261]	ATP binding [GO:0005524]; hydrolase activity [GO:0016787]; proton-transporting ATPase activity, rotational mechanism [GO:0046961]; proton-transporting ATP synthase activity, rotational mechanism [GO:0046933]	20210409_ALS_XL_F63.raw	17484
Inter	Cre12.g519180.t2.1	Cre02.g095250.t1.1	Elongation factor Ts-like protein	ATPases	980	7717	ESIAAIGEKISVR	1×DSSO [K9]	VEVAAPGAAKDAKK	1×DSSO [K10]	73.25	38.53	1	FALSE	A8J637	A0A2K3E1W0	response to light stimulus [GO:0009416]	chloroplast [GO:0009507]; chloroplast ribosome [GO:0043253]; mitochondrion [GO:0005739]	mRNA binding [GO:0003729]; polysome binding [GO:1905538]; translation elongation factor activity [GO:0003746]; translation elongation factor binding [GO:0061770]	NA	NA	ATPase activity [GO:0016887]; ATP binding [GO:0005524]	20210409_ALS_XL_F39.raw	56309
Inter	Cre17.g701050.t1.2	Cre05.g247450.t1.2	zinc ion binding	Putative rhodanese-like protein	266	17	APAAAAAKPAAAATK	1×DSSO [K8]	APAKQAQHAR	1×DSSO [K4]	72.97	11.61	2	TRUE	A0A2K3CNX7	A0A2K3DS48	negative regulation of transcription by RNA polymerase II [GO:0000122]; rRNA processing [GO:0006364]	nucleolus [GO:0005730]	DNA binding [GO:0003677]; metal ion binding [GO:0046872]	NA	NA	NA	20210409_ALS_XL_F23.raw	24930
Intra	Cre17.g720250.t1.2	Cre17.g720250.t1.2	Light-harvesting minor chlorophyll a/b binding protein of photosystem II	Light-harvesting minor chlorophyll a/b binding protein of photosystem II	4	21	VFKFPTPPGTQKK	1×Acetyl [V1]; 1×DSSO [K3]	AGTTATKPAPK	1×DSSO [K7]	72.7	29.25	2	TRUE	A8J6D1	A8J6D1	photosynthesis, light harvesting in photosystem I [GO:0009768]; protein-chromophore linkage [GO:0018298]; response to light stimulus [GO:0009416]	chloroplast envelope [GO:0009941]; chloroplast thylakoid membrane [GO:0009535]; photosystem I [GO:0009522]; photosystem II [GO:0009523]; plastoglobule [GO:0010287]	chlorophyll binding [GO:0016168]	photosynthesis, light harvesting in photosystem I [GO:0009768]; protein-chromophore linkage [GO:0018298]; response to light stimulus [GO:0009416]	chloroplast envelope [GO:0009941]; chloroplast thylakoid membrane [GO:0009535]; photosystem I [GO:0009522]; photosystem II [GO:0009523]; plastoglobule [GO:0010287]	chlorophyll binding [GO:0016168]	20210409_ALS_XL_F49.raw	31529
Inter	Cre09.g391097.t2.1	Cre12.g494400.t1.2	Cytosolic 80S ribosomal protein L4	ATP-binding protein, MRP/NBP35 family	142	404	AAPKVVGR	1×DSSO [K4]	AAAAK	1×DSSO [K5]	72.62	32.26	1	FALSE	A8J1A3	A0A2K3D1T4	NA	ribosome [GO:0005840]	NA	iron-sulfur cluster assembly [GO:0016226]	cytosol [GO:0005829]	4 iron, 4 sulfur cluster binding [GO:0051539]; ATPase activity [GO:0016887]; ATP binding [GO:0005524]; iron-sulfur cluster binding [GO:0051536]; metal ion binding [GO:0046872]; protein homodimerization activity [GO:0042803]	20210409_ALS_XL_F43.raw	9198
Intra	Cre02.g080650.t1.2	Cre02.g080650.t1.2	Heat shock protein 90B	Heat shock protein 90B	477	470	KMAEAEVK	1×Oxidation [M2]; 1×DSSO [K1]	KVLDMIR	1×Oxidation [M5]; 1×DSSO [K1]	72.05	12.49	2	TRUE	A0A220IUF1	A0A220IUF1	protein folding [GO:0006457]; protein secretion [GO:0009306]; regulation of meristem growth [GO:0010075]; regulation of meristem structural organization [GO:0009934]; response to cadmium ion [GO:0046686]; response to cold [GO:0009409]; response to endoplasmic reticulum stress [GO:0034976]; response to salt stress [GO:0009651]; response to water deprivation [GO:0009414]	chloroplast [GO:0009507]; endoplasmic reticulum [GO:0005783]; mitochondrion [GO:0005739]; nucleus [GO:0005634]; perinuclear region of cytoplasm [GO:0048471]; plasma membrane [GO:0005886]; plasmodesma [GO:0009506]; vacuolar membrane [GO:0005774]	ATPase activity [GO:0016887]; ATP binding [GO:0005524]; unfolded protein binding [GO:0051082]	protein folding [GO:0006457]; protein secretion [GO:0009306]; regulation of meristem growth [GO:0010075]; regulation of meristem structural organization [GO:0009934]; response to cadmium ion [GO:0046686]; response to cold [GO:0009409]; response to endoplasmic reticulum stress [GO:0034976]; response to salt stress [GO:0009651]; response to water deprivation [GO:0009414]	chloroplast [GO:0009507]; endoplasmic reticulum [GO:0005783]; mitochondrion [GO:0005739]; nucleus [GO:0005634]; perinuclear region of cytoplasm [GO:0048471]; plasma membrane [GO:0005886]; plasmodesma [GO:0009506]; vacuolar membrane [GO:0005774]	ATPase activity [GO:0016887]; ATP binding [GO:0005524]; unfolded protein binding [GO:0051082]	20210409_ALS_XL_F56.raw	16623
Inter	Cre11.g477733.t1.2	Cre06.g306300.t1.2	None	Magnesium chelatase subunit I, isoform 1	19	116	RAEEVKAAEGR	1×DSSO [K6]	GTGKSTTIR	1×DSSO [K4]	72.62	25.78	1	TRUE	A0A2K3D8F6	A8IMZ5	NA	NA	NA	chlorophyll biosynthetic process [GO:0015995]; photosynthesis [GO:0015979]	chloroplast stroma [GO:0009570]	ATP binding [GO:0005524]; magnesium chelatase activity [GO:0016851]	20210409_ALS_XL_F40.raw	19243
Intra	Cre11.g468750.t1.2	Cre11.g468750.t1.2	Conserved in the Plant Lineage and Diatoms	Conserved in the Plant Lineage and Diatoms	209	145	IKAIRQELETK	1×DSSO [K2]	LKPDGFTPK	1×DSSO [K2]	72.62	23.77	1	TRUE	A8JC47	A8JC47	NA	NA	NA	NA	NA	NA	20210409_ALS_XL_F58.raw	22922
Intra	Cre12.g513150.t1.2	Cre12.g513150.t1.2	mitochondrial intermembrane space protein involved in protein import.	mitochondrial intermembrane space protein involved in protein import.	281	287	ESAKKEAPK	1×DSSO [K4]	KEAKPAVK	1×DSSO [K1]	72.59	19.13	1	TRUE	A8JH97	A8JH97	chromatin organization [GO:0006325]; regulation of double-strand break repair [GO:2000779]	nucleus [GO:0005634]	DNA binding [GO:0003677]; histone binding [GO:0042393]	chromatin organization [GO:0006325]; regulation of double-strand break repair [GO:2000779]	nucleus [GO:0005634]	DNA binding [GO:0003677]; histone binding [GO:0042393]	20210409_ALS_XL_F63.raw	4710
Intra	Cre01.g038850.t1.1	Cre01.g038850.t1.1	poly(A) binding protein 2	poly(A) binding protein 2	729	503	LAISFVNPSKHTDR	1×DSSO [K10]	AKESLESQSR	1×DSSO [K2]	72.35	44.37	1	TRUE	A0A2K3E781	A0A2K3E781	NA	nucleus [GO:0005634]; ribonucleoprotein complex [GO:1990904]	RNA binding [GO:0003723]	NA	nucleus [GO:0005634]; ribonucleoprotein complex [GO:1990904]	RNA binding [GO:0003723]	20210409_ALS_XL_F58.raw	25486
Intra	Cre06.g261450.t1.2	Cre06.g261450.t1.2	High mobility group protein	High mobility group protein	137	144	EMESYGGSSGASKKPAAK	1×Oxidation [M2]; 1×DSSO [K14]	KEKAAPK	1×DSSO [K3]	72.33	72.33	1	TRUE	A8HXE1	A8HXE1	NA	nucleus [GO:0005634]	DNA binding, bending [GO:0008301]	NA	nucleus [GO:0005634]	DNA binding, bending [GO:0008301]	20210409_ALS_XL_F61.raw	6627
Intra	Cre03.g193750.t1.1	Cre03.g193750.t1.1	Glycine cleavage system, T protein	Glycine cleavage system, T protein	388	394	AGTALKVEVR	1×DSSO [K6]	GKVNDAVVTK	1×DSSO [K2]	72.23	27.59	1	TRUE	A0A2K3DYI9	A0A2K3DYI9	glycine decarboxylation via glycine cleavage system [GO:0019464]	mitochondrion [GO:0005739]	aminomethyltransferase activity [GO:0004047]; transaminase activity [GO:0008483]	glycine decarboxylation via glycine cleavage system [GO:0019464]	mitochondrion [GO:0005739]	aminomethyltransferase activity [GO:0004047]; transaminase activity [GO:0008483]	20210409_ALS_XL_F54.raw	20967
Inter	Cre01.g010900.t1.2	Cre10.g466850.t1.1	Glyceraldehyde-3-Phosphate Dehydrogenase	peptidyl-prolyl cis-trans isomerase, FKBP-type	108	17	IVDDSHISVDGKQIK	1×DSSO [K12]	ELKKR	1×DSSO [K4]	72.12	4.27	1	FALSE	A8HP84	A8I1U5	glucose metabolic process [GO:0006006]	chloroplast [GO:0009507]	glyceraldehyde-3-phosphate dehydrogenase (NAD+) (phosphorylating) activity [GO:0004365]; lyase activity [GO:0016829]; NAD binding [GO:0051287]; NADP binding [GO:0050661]	NA	NA	NA	20210409_ALS_XL_F64.raw	22829
Intra	Cre12.g514850.t1.2	Cre12.g514850.t1.2	Heat shock protein 90C	Heat shock protein 90C	294	304	KVVDEEATKK	1×DSSO [K1]	KKQAAADAK	1×DSSO [K2]	109.6	16.01	5	TRUE	Q66T67	Q66T67	protein folding [GO:0006457]	endoplasmic reticulum [GO:0005783]; perinuclear region of cytoplasm [GO:0048471]	ATPase activity [GO:0016887]; ATP binding [GO:0005524]; unfolded protein binding [GO:0051082]	protein folding [GO:0006457]	endoplasmic reticulum [GO:0005783]; perinuclear region of cytoplasm [GO:0048471]	ATPase activity [GO:0016887]; ATP binding [GO:0005524]; unfolded protein binding [GO:0051082]	20210409_ALS_XL_F59.raw	6330
Intra	Cre04.g222700.t1.2	Cre04.g222700.t1.2	Elongation Factor 3 and ABC transporter	Elongation Factor 3 and ABC transporter	1027	1034	MSNKEKK	1×Oxidation [M1]; 1×DSSO [K4]	KALEKLR	1×DSSO [K5]	72.05	14.55	2	TRUE	A8ISZ1	A8ISZ1	NA	NA	ATPase activity [GO:0016887]; ATP binding [GO:0005524]; translation elongation factor activity [GO:0003746]	NA	NA	ATPase activity [GO:0016887]; ATP binding [GO:0005524]; translation elongation factor activity [GO:0003746]	20210409_ALS_XL_F63.raw	8357
Inter	Cre12.g489153.t1.1	Cre04.g225301.t1.1	Cytosolic 80S ribosomal protein L31	None	56	18	SKEQVTR	1×DSSO [K2]	AKSAATR	1×DSSO [K2]	72.05	18.83	1	TRUE	A0A2K3D279	A0A2K3DUJ7	cytoplasmic translation [GO:0002181]	cytosolic large ribosomal subunit [GO:0022625]	structural constituent of ribosome [GO:0003735]	NA	NA	NA	20210409_ALS_XL_F63.raw	3813
Intra	Cre17.g701200.t1.2	Cre17.g701200.t1.2	Cytosolic 80S ribosomal protein L14	Cytosolic 80S ribosomal protein L14	123	135	KVLNGLKK	1×DSSO [K1]	TAAPKKK	1×DSSO [K5]	72	21.96	1	TRUE	A8IQE3	A8IQE3	ribosomal large subunit biogenesis [GO:0042273]; translation [GO:0006412]	cytosolic large ribosomal subunit [GO:0022625]	RNA binding [GO:0003723]; structural constituent of ribosome [GO:0003735]	ribosomal large subunit biogenesis [GO:0042273]; translation [GO:0006412]	cytosolic large ribosomal subunit [GO:0022625]	RNA binding [GO:0003723]; structural constituent of ribosome [GO:0003735]	20210409_ALS_XL_F64.raw	8611
Inter	Cre12.g510450.t1.2	Cre05.g242300.t1.2	Cytosolic 80S ribosomal protein S28	Eukaryotic translation initiation factor 3, subunit D	19	419	VKFLDDQNRLIMR	1×Oxidation [M12]; 1×DSSO [K2]	GAVVLSETKNNKFK	1×DSSO [K12]	71.88	71.88	1	TRUE	A8IKP1	A0A2K3DSI2	NA	NA	NA	translational initiation [GO:0006413]	eukaryotic translation initiation factor 3 complex [GO:0005852]	translation initiation factor activity [GO:0003743]	20210409_ALS_XL_F60.raw	30451
Inter	Cre08.g360900.t1.2	Cre13.g568650.t1.2	Cytosolic 80S ribosomal protein S15	Cytosolic 80S ribosomal protein S3a	8	219	ADAAGDKK	1×Acetyl [A1]; 1×DSSO [K7]	VLKAPK	1×DSSO [K3]	71.79	36.62	1	TRUE	A8J493	A8HS48	ribosomal small subunit assembly [GO:0000028]; translation [GO:0006412]	cytosolic small ribosomal subunit [GO:0022627]	RNA binding [GO:0003723]; structural constituent of ribosome [GO:0003735]	translation [GO:0006412]	cytosol [GO:0005829]; cytosolic small ribosomal subunit [GO:0022627]	structural constituent of ribosome [GO:0003735]	20210409_ALS_XL_F41.raw	11446
Intra	Cre10.g423250.t1.2	Cre10.g423250.t1.2	NAD-dependent malate dehydrogenase	NAD-dependent malate dehydrogenase	339	353	AELLGSIKK	1×DSSO [K8]	GPAPAK	1×DSSO [K6]	71.79	18.96	1	TRUE	A8ICG9	A8ICG9	carbohydrate metabolic process [GO:0005975]; malate metabolic process [GO:0006108]; tricarboxylic acid cycle [GO:0006099]	chloroplast [GO:0009507]; cytoplasm [GO:0005737]	L-malate dehydrogenase activity [GO:0030060]	carbohydrate metabolic process [GO:0005975]; malate metabolic process [GO:0006108]; tricarboxylic acid cycle [GO:0006099]	chloroplast [GO:0009507]; cytoplasm [GO:0005737]	L-malate dehydrogenase activity [GO:0030060]	20210409_ALS_XL_F41.raw	20991
Intra	Cre17.g710800.t2.1	Cre17.g710800.t2.1	iron-sulfur cluster assembly protein	iron-sulfur cluster assembly protein	472	479	GITGAVKDTFK	1×DSSO [K7]	DLKEVR	1×DSSO [K3]	71.79	27.1	1	TRUE	A0A2K3CPM4	A0A2K3CPM4	iron-sulfur cluster assembly [GO:0016226]	NA	iron ion binding [GO:0005506]; iron-sulfur cluster binding [GO:0051536]	iron-sulfur cluster assembly [GO:0016226]	NA	iron ion binding [GO:0005506]; iron-sulfur cluster binding [GO:0051536]	20210409_ALS_XL_F55.raw	26846
Intra	Cre02.g116250.t1.1	Cre02.g116250.t1.1	(1 of 1) PTHR28055:SF1 - ALTERED INHERITANCE OF MITOCHONDRIA PROTEIN 41, MITOCHONDRIAL	(1 of 1) PTHR28055:SF1 - ALTERED INHERITANCE OF MITOCHONDRIA PROTEIN 41, MITOCHONDRIAL	52	58	IKSDMKDAMK	2×Oxidation [M5; M9]; 1×DSSO [K6]	AKDQAR	1×DSSO [K2]	71.79	71.79	1	TRUE	A8I2P1	A8I2P1	NA	NA	NA	NA	NA	NA	20210409_ALS_XL_F61.raw	4105
Inter	Cre12.g528000.t1.2	Cre04.g222700.t1.2	Flagellar Associated Protein 303	Elongation Factor 3 and ABC transporter	379	997	EIIKPEAPQHNFKR	1×DSSO [K13]	EKVEIK	1×DSSO [K2]	71.79	18.57	2	TRUE	A8J5B8	A8ISZ1	NA	NA	NA	NA	NA	ATPase activity [GO:0016887]; ATP binding [GO:0005524]; translation elongation factor activity [GO:0003746]	20210409_ALS_XL_F62.raw	21251
Intra	Cre12.g537800.t1.2	Cre12.g537800.t1.2	Cytosolic 80S ribosomal protein L7	Cytosolic 80S ribosomal protein L7	47	43	AEKYVAEYR	1×DSSO [K3]	KDIFKR	1×DSSO [K5]	71.79	25.8	1	TRUE	A0A2K3D598	A0A2K3D598	maturation of LSU-rRNA from tricistronic rRNA transcript (SSU-rRNA, 5.8S rRNA, LSU-rRNA) [GO:0000463]	cytosolic large ribosomal subunit [GO:0022625]	RNA binding [GO:0003723]; structural constituent of ribosome [GO:0003735]	maturation of LSU-rRNA from tricistronic rRNA transcript (SSU-rRNA, 5.8S rRNA, LSU-rRNA) [GO:0000463]	cytosolic large ribosomal subunit [GO:0022625]	RNA binding [GO:0003723]; structural constituent of ribosome [GO:0003735]	20210409_ALS_XL_F63.raw	21923
Intra	Cre05.g233950.t1.2	Cre05.g233950.t1.2	Conserved in the Green Lineage	Conserved in the Green Lineage	131	139	EELMKDIGDLSK	1×Oxidation [M4]; 1×DSSO [K5]	KISGSE	1×DSSO [K1]	71.75	44.83	1	TRUE	A0A2K3DRS1	A0A2K3DRS1	NA	integral component of membrane [GO:0016021]; thylakoid [GO:0009579]	NA	NA	integral component of membrane [GO:0016021]; thylakoid [GO:0009579]	NA	20210409_ALS_XL_F40.raw	22447
Intra	Cre13.g586000.t1.2	Cre13.g586000.t1.2	AMP-dependent synthetase and ligase family protein	AMP-dependent synthetase and ligase family protein	10	3	ASKNVGR	1×DSSO [K3]	SKLLAR	1×Acetyl [S1]; 1×DSSO [K2]	71.75	29.82	2	TRUE	A0A2K3D0R7	A0A2K3D0R7	fatty acid biosynthetic process [GO:0006633]	NA	CoA-ligase activity [GO:0016405]; very long-chain fatty acid-CoA ligase activity [GO:0031957]	fatty acid biosynthetic process [GO:0006633]	NA	CoA-ligase activity [GO:0016405]; very long-chain fatty acid-CoA ligase activity [GO:0031957]	20210409_ALS_XL_F44.raw	18793
Inter	Cre06.g282500.t1.2	Cre02.g088700.t1.2	Cytosolic 80S ribosomal protein L23a	None	6	249	GKADAKAVAAK	1×DSSO [K2]	KAAAVK	1×DSSO [K1]	71.75	71.75	1	TRUE	A8J239	A0A2K3E139	ribosomal large subunit assembly [GO:0000027]; translation [GO:0006412]	cytosolic large ribosomal subunit [GO:0022625]	structural constituent of ribosome [GO:0003735]	NA	NA	NA	20210409_ALS_XL_F59.raw	6881
Intra	Cre03.g148300.t1.2	Cre03.g148300.t1.2	None	None	941	936	GAAKASAGASGSAK	1×DSSO [K4]	GAVAGGKK	1×DSSO [K7]	71.71	13.88	1	TRUE	A0A2K3DVI2	A0A2K3DVI2	NA	NA	NA	NA	NA	NA	20210409_ALS_XL_F55.raw	4564
Intra	Cre01.g041000.t1.1	Cre01.g041000.t1.1	DNA-binding enhancer protein-related	DNA-binding enhancer protein-related	70	62	AREKELAAVK	1×DSSO [K4]	ASKDAER	1×DSSO [K3]	71.71	31.35	2	TRUE	A0A2K3E7E8	A0A2K3E7E8	negative regulation of apoptotic process [GO:0043066]; protein stabilization [GO:0050821]	NA	NA	negative regulation of apoptotic process [GO:0043066]; protein stabilization [GO:0050821]	NA	NA	20210409_ALS_XL_F56.raw	11215
Intra	Cre10.g420750.t1.2	Cre10.g420750.t1.2	Cytosolic 80S ribosomal protein L30	Cytosolic 80S ribosomal protein L30	10	6	KTQENINAR	1×DSSO [K1]	APATKK	1×DSSO [K5]	71.5	34.8	1	TRUE	A8ICT1	A8ICT1	NA	cytosolic large ribosomal subunit [GO:0022625]	RNA binding [GO:0003723]; structural constituent of ribosome [GO:0003735]	NA	cytosolic large ribosomal subunit [GO:0022625]	RNA binding [GO:0003723]; structural constituent of ribosome [GO:0003735]	20210409_ALS_XL_F57.raw	6282
Intra	Cre06.g282500.t1.2	Cre06.g282500.t1.2	Cytosolic 80S ribosomal protein L23a	Cytosolic 80S ribosomal protein L23a	22	18	KGSFKK	1×DSSO [K1]	AAKAVK	1×DSSO [K3]	71.5	9.11	2	FALSE	A8J239	A8J239	ribosomal large subunit assembly [GO:0000027]; translation [GO:0006412]	cytosolic large ribosomal subunit [GO:0022625]	structural constituent of ribosome [GO:0003735]	ribosomal large subunit assembly [GO:0000027]; translation [GO:0006412]	cytosolic large ribosomal subunit [GO:0022625]	structural constituent of ribosome [GO:0003735]	20210409_ALS_XL_F61.raw	5351
Intra	gi|41179049|ref|NP_958405.1|	gi|41179049|ref|NP_958405.1|	ribulose-1,5-bisphosphate carboxylase/oxygenase large subunit (chloroplast)	ribulose-1,5-bisphosphate carboxylase/oxygenase large subunit (chloroplast)	658	639	LGLSAKNYGR	1×DSSO [K6]	DKLNKYGR	1×DSSO [K5]	71.38	28.31	1	TRUE	P00877	P00877	NA	NA	NA	NA	NA	NA	20210409_ALS_XL_F61.raw	21422
Inter	Cre12.g532550.t1.1	Cre17.g701200.t1.2	Cytosolic 80S ribosomal protein L13a	Cytosolic 80S ribosomal protein L14	166	135	SKAAAQVKA	1×DSSO [K2]	TAAPKKK	1×DSSO [K5]	71.35	5.46	1	TRUE	A0A2K3D4X3	A8IQE3	negative regulation of translation [GO:0017148]; translation [GO:0006412]	cytosolic large ribosomal subunit [GO:0022625]; ribosome [GO:0005840]	mRNA binding [GO:0003729]; structural constituent of ribosome [GO:0003735]	ribosomal large subunit biogenesis [GO:0042273]; translation [GO:0006412]	cytosolic large ribosomal subunit [GO:0022625]	RNA binding [GO:0003723]; structural constituent of ribosome [GO:0003735]	20210409_ALS_XL_F59.raw	5471
Intra	Cre06.g261450.t1.2	Cre06.g261450.t1.2	High mobility group protein	High mobility group protein	9	17	AGDKAATKEK	1×DSSO [K8]	KAAEPKGK	1×DSSO [K6]	71.35	71.35	1	TRUE	A8HXE1	A8HXE1	NA	nucleus [GO:0005634]	DNA binding, bending [GO:0008301]	NA	nucleus [GO:0005634]	DNA binding, bending [GO:0008301]	20210409_ALS_XL_F64.raw	3820
Inter	Cre03.g156050.t1.2	Cre02.g095800.t1.2	ribosome recycling factor, chloroplast precursor	(1 of 1) PF05236 - Transcription initiation factor TFIID component TAF4 family (TAF4)	63	690	GGKAEAPAKEEK	1×DSSO [K3]	AKEVQK	1×DSSO [K2]	71.3	25.23	1	TRUE	A0A2K3DW10	A0A2K3E1Y5	translation [GO:0006412]	mitochondrion [GO:0005739]	ribosomal large subunit binding [GO:0043023]	NA	NA	NA	20210409_ALS_XL_F64.raw	3840
Intra	Cre13.g567700.t1.2	Cre13.g567700.t1.2	Histone H2A variant	Histone H2A variant	12	4	GLSGKGAK	1×DSSO [K5]	SGKGAK	1×Acetyl [S1]; 1×DSSO [K3]	71.07	12.91	1	TRUE	A8HRZ9	A8HRZ9	chromatin silencing [GO:0006342]	nucleosome [GO:0000786]; nucleus [GO:0005634]	DNA binding [GO:0003677]; protein heterodimerization activity [GO:0046982]	chromatin silencing [GO:0006342]	nucleosome [GO:0000786]; nucleus [GO:0005634]	DNA binding [GO:0003677]; protein heterodimerization activity [GO:0046982]	20210409_ALS_XL_F44.raw	6719
Intra	Cre08.g360900.t1.2	Cre08.g360900.t1.2	Cytosolic 80S ribosomal protein S15	Cytosolic 80S ribosomal protein S15	8	14	ADAAGDKKR	1×Acetyl [A1]; 1×DSSO [K7]	KFTYR	1×DSSO [K1]	70.86	70.86	3	TRUE	A8J493	A8J493	ribosomal small subunit assembly [GO:0000028]; translation [GO:0006412]	cytosolic small ribosomal subunit [GO:0022627]	RNA binding [GO:0003723]; structural constituent of ribosome [GO:0003735]	ribosomal small subunit assembly [GO:0000028]; translation [GO:0006412]	cytosolic small ribosomal subunit [GO:0022627]	RNA binding [GO:0003723]; structural constituent of ribosome [GO:0003735]	20210409_ALS_XL_F57.raw	13062
Inter	Cre02.g080700.t1.2	Cre02.g084150.t1.1	Endoplasmic reticulum associated Hsp70 protein	receptor like protein 9	114	2524	DKKLVSYDIVDR	1×DSSO [K3]	EKVQR	1×DSSO [K2]	70.86	70.86	1	TRUE	A8I7T8	A0A2K3E0P6	cellular response to unfolded protein [GO:0034620]; chaperone cofactor-dependent protein refolding [GO:0051085]; endoplasmic reticulum unfolded protein response [GO:0030968]; protein refolding [GO:0042026]; ubiquitin-dependent ERAD pathway [GO:0030433]	cytoplasm [GO:0005737]; endoplasmic reticulum chaperone complex [GO:0034663]; endoplasmic reticulum lumen [GO:0005788]; membrane [GO:0016020]; nucleus [GO:0005634]	ATPase activity [GO:0016887]; ATP binding [GO:0005524]; heat shock protein binding [GO:0031072]; misfolded protein binding [GO:0051787]; protein folding chaperone [GO:0044183]; unfolded protein binding [GO:0051082]	NA	cytoskeleton [GO:0005856]; integral component of membrane [GO:0016021]; membrane [GO:0016020]	NA	20210409_ALS_XL_F65.raw	22563
Inter	Cre06.g298850.t1.2	Cre05.g233300.t1.2	LAT2 homolog	Tetrapyrrole (Corrin/Porphyrin) Methylases	241	155	VTQGRPKFNHAKVEAR	1×DSSO [K7]	KMGLHTLCLLDIK	1×Carbamidomethyl [C8]; 1×DSSO [K1]	70.69	10.62	1	FALSE	A0A2K3DQS7	A0A2K3DRT9	NA	NA	NA	methylation [GO:0032259]; peptidyl-diphthamide biosynthetic process from peptidyl-histidine [GO:0017183]	NA	diphthine synthase activity [GO:0004164]	20210409_ALS_XL_F56.raw	45154
Intra	Cre12.g513750.t1.1	Cre12.g513750.t1.1	Glutaredoxin, CPYC type	Glutaredoxin, CPYC type	1	14	ATKLDSIR	1×DSSO [A1]	ETVAKNK	1×DSSO [K5]	70.49	70.49	1	TRUE	A8JHA9	A8JHA9	NA	NA	NA	NA	NA	NA	20210409_ALS_XL_F56.raw	14393
Intra	Cre02.g080200.t1.2	Cre02.g080200.t1.2	Transketolase	Transketolase	289	291	AVKDKPTLIK	1×DSSO [K3]	DKPTLIK	1×DSSO [K2]	70.49	137.2	1	TRUE	A8IAN1	A8IAN1	pentose-phosphate shunt [GO:0006098]	cytosol [GO:0005829]	metal ion binding [GO:0046872]; transketolase activity [GO:0004802]	pentose-phosphate shunt [GO:0006098]	cytosol [GO:0005829]	metal ion binding [GO:0046872]; transketolase activity [GO:0004802]	20210409_ALS_XL_F58.raw	24953
Inter	Cre12.g507400.t1.2	Cre06.g250100.t1.2	predicted protein	Heat shock protein 70B	561	561	KNIFKLAQGEYIAPEK	1×DSSO [K5]	FAGEDKK	1×DSSO [K6]	70.49	65.6	1	TRUE	A0A2K3D2U0	A8HYV3	NA	endoplasmic reticulum [GO:0005783]; membrane [GO:0016020]	long-chain fatty acid-CoA ligase activity [GO:0004467]	protein folding [GO:0006457]	chloroplast [GO:0009507]	ATPase activity [GO:0016887]; ATP binding [GO:0005524]; unfolded protein binding [GO:0051082]	20210409_ALS_XL_F63.raw	26321
Intra	Cre06.g310700.t1.2	Cre06.g310700.t1.2	Ribosomal protein L36a	Ribosomal protein L36a	22	6	KHMMMKVTQYK	3×Oxidation [M3; M4; M5]; 1×DSSO [K6]	VNVPKTK	1×DSSO [K5]	70.49	45.4	1	TRUE	A8IM74	A8IM74	translation [GO:0006412]	cytosolic large ribosomal subunit [GO:0022625]	structural constituent of ribosome [GO:0003735]	translation [GO:0006412]	cytosolic large ribosomal subunit [GO:0022625]	structural constituent of ribosome [GO:0003735]	20210409_ALS_XL_F65.raw	11952
Inter	Cre06.g253350.t1.2	Cre09.g410800.t1.2	Glycine cleavage system H protein, mitochondrial	High affinity nitrate transporter	40	1	GYKYAASHEWAK	1×DSSO [K3]	ATVEK	1×DSSO [A1]	70.29	19.66	1	TRUE	A8HYD5	Q39609	glycine decarboxylation via glycine cleavage system [GO:0019464]; protein lipoylation [GO:0009249]	cytoplasm [GO:0005737]; glycine cleavage complex [GO:0005960]; mitochondrion [GO:0005739]	ATP binding [GO:0005524]	nitrate assimilation [GO:0042128]	integral component of membrane [GO:0016021]; plasma membrane [GO:0005886]	nitrate transmembrane transporter activity [GO:0015112]; nitrite transmembrane transporter activity [GO:0015113]	20210409_ALS_XL_F57.raw	17709
Inter	Cre07.g336350.t1.1	Cre02.g109050.t1.2	poly(A) binding protein 2	OctotricoPeptide Repeat Protein	190	544	YADTHEEKQR	1×DSSO [K8]	KAGTR	1×DSSO [K1]	70.29	12.49	1	FALSE	A0A2K3DK89	A0A2K3E2S5	NA	ribonucleoprotein complex [GO:1990904]	RNA binding [GO:0003723]	NA	NA	NA	20210409_ALS_XL_F63.raw	4468
Inter	Cre01.g010900.t1.2	Cre07.g339150.t1.1	Glyceraldehyde-3-Phosphate Dehydrogenase	Chaperonin 60B2	108	424	IVDDSHISVDGKQIK	1×DSSO [K12]	EKKLR	1×DSSO [K3]	70.29	14.71	2	FALSE	A8HP84	A8ITH8	glucose metabolic process [GO:0006006]	chloroplast [GO:0009507]	glyceraldehyde-3-phosphate dehydrogenase (NAD+) (phosphorylating) activity [GO:0004365]; lyase activity [GO:0016829]; NAD binding [GO:0051287]; NADP binding [GO:0050661]	protein folding [GO:0006457]; protein refolding [GO:0042026]	NA	ATPase activity [GO:0016887]; ATP binding [GO:0005524]	20210409_ALS_XL_F64.raw	22682
Intra	Cre10.g460050.t2.1	Cre10.g460050.t2.1	FLU protein, chloroplast precursor	FLU protein, chloroplast precursor	362	369	AAVYYDKYIER	1×DSSO [K7]	MNKDGPI	1×Oxidation [M1]; 1×DSSO [K3]	70.1	38.17	2	FALSE	Q64FN7	Q64FN7	chlorophyll biosynthetic process [GO:0015995]	chloroplast [GO:0009507]	NA	chlorophyll biosynthetic process [GO:0015995]	chloroplast [GO:0009507]	NA	20210409_ALS_XL_F42.raw	29737
Intra	Cre03.g213537.t1.1	Cre03.g213537.t1.1	basic transcription factor 3	basic transcription factor 3	37	44	TTSTDDKR	1×DSSO [K7]	LQNTLKR	1×DSSO [K6]	70.1	21.25	1	TRUE	A8JBX6	A8JBX6	NA	cytosol [GO:0005829]; nascent polypeptide-associated complex [GO:0005854]; polysomal ribosome [GO:0042788]	mRNA binding [GO:0003729]	NA	cytosol [GO:0005829]; nascent polypeptide-associated complex [GO:0005854]; polysomal ribosome [GO:0042788]	mRNA binding [GO:0003729]	20210409_ALS_XL_F57.raw	9756
Intra	Cre12.g498600.t1.2	Cre12.g498600.t1.2	Eukaryotic translation elongation factor 1 alpha	Eukaryotic translation elongation factor 1 alpha	82	103	LKEEAAALGK	1×DSSO [K2]	AKEERER	1×DSSO [K2]	70.1	5.54	1	FALSE	A0A2K3D3E1	A0A2K3D3E1	translation [GO:0006412]	NA	GTPase activity [GO:0003924]; GTP binding [GO:0005525]	translation [GO:0006412]	NA	GTPase activity [GO:0003924]; GTP binding [GO:0005525]	20210409_ALS_XL_F60.raw	11396
Inter	Cre01.g055408.t1.1	Cre02.g086650.t1.2	acetyl-CoA synthetase	Structural Maintenance of Chromosomes protein	240	907	GPKSIDLK	1×DSSO [K3]	KLDAK	1×DSSO [K1]	69.9	16.13	1	FALSE	A8JCQ8	A0A2K3E0Z8	acetyl-CoA biosynthetic process from acetate [GO:0019427]	NA	acetate-CoA ligase activity [GO:0003987]; AMP binding [GO:0016208]; ATP binding [GO:0005524]	chromosome condensation [GO:0030261]; meiotic cell cycle [GO:0051321]	chromosome [GO:0005694]; nucleus [GO:0005634]	ATPase activity [GO:0016887]; ATP binding [GO:0005524]	20210409_ALS_XL_F57.raw	14344
Inter	Cre12.g484050.t1.2	Cre06.g256900.t1.1	Cytosolic 80S ribosomal protein L36	SAND domain-encoding short ORF	54	159	EVIRDVAGLAPYEKR	1×DSSO [K14]	LKVGK	1×DSSO [K2]	69.9	16.13	1	FALSE	A8JHU2	A0A2K3DMD2	cytoplasmic translation [GO:0002181]	cytosolic large ribosomal subunit [GO:0022625]	structural constituent of ribosome [GO:0003735]	NA	NA	NA	20210409_ALS_XL_F59.raw	27656
Inter	Cre06.g306300.t1.2	Cre02.g095800.t1.2	Magnesium chelatase subunit I, isoform 1	(1 of 1) PF05236 - Transcription initiation factor TFIID component TAF4 family (TAF4)	308	638	KDYEAGQMALTQR	1×DSSO [K1]	KADEVK	1×DSSO [K1]	69.64	8.86	1	TRUE	A8IMZ5	A0A2K3E1Y5	chlorophyll biosynthetic process [GO:0015995]; photosynthesis [GO:0015979]	chloroplast stroma [GO:0009570]	ATP binding [GO:0005524]; magnesium chelatase activity [GO:0016851]	NA	NA	NA	20210409_ALS_XL_F39.raw	20119
Intra	Cre17.g734500.t1.2	Cre17.g734500.t1.2	Vacuolar ATP synthase subunit E	Vacuolar ATP synthase subunit E	58	67	KEGQVEVKK	1×DSSO [K1]	KIEYSK	1×DSSO [K1]	69.64	24.92	1	TRUE	A8IW47	A8IW47	NA	proton-transporting two-sector ATPase complex, catalytic domain [GO:0033178]	proton-exporting ATPase activity, phosphorylative mechanism [GO:0008553]; proton-transporting ATPase activity, rotational mechanism [GO:0046961]	NA	proton-transporting two-sector ATPase complex, catalytic domain [GO:0033178]	proton-exporting ATPase activity, phosphorylative mechanism [GO:0008553]; proton-transporting ATPase activity, rotational mechanism [GO:0046961]	20210409_ALS_XL_F60.raw	9834
Inter	Cre08.g360900.t1.2	Cre06.g272950.t1.1	Cytosolic 80S ribosomal protein S15	Cytosolic 80S ribosomal protein S18	9	92	ADAAGDKKR	1×Acetyl [A1]; 1×DSSO [K8]	DHKTGR	1×DSSO [K3]	69.64	69.64	2	TRUE	A8J493	A8HVP2	ribosomal small subunit assembly [GO:0000028]; translation [GO:0006412]	cytosolic small ribosomal subunit [GO:0022627]	RNA binding [GO:0003723]; structural constituent of ribosome [GO:0003735]	translation [GO:0006412]	cytosol [GO:0005829]; small ribosomal subunit [GO:0015935]	RNA binding [GO:0003723]; structural constituent of ribosome [GO:0003735]	20210409_ALS_XL_F61.raw	5175
Inter	Cre08.g367300.t1.1	Cre01.g040000.t1.2	DNA-binding bromodomain-containing protein	Cytosolic 80S ribosomal protein L26	21	115	KLTEQR	1×DSSO [K1]	KALLER	1×DSSO [K1]	69.64	6.59	2	TRUE	A0A2K3DGY3	A8HMG7	NA	NA	NA	cytoplasmic translation [GO:0002181]; ribosomal large subunit biogenesis [GO:0042273]	cytosolic large ribosomal subunit [GO:0022625]	RNA binding [GO:0003723]; structural constituent of ribosome [GO:0003735]	20210409_ALS_XL_F64.raw	13504
Inter	Cre09.g400650.t1.2	Cre01.g012450.t1.1	Cytosolic 80S ribosomal protein S6	ubiquitin-protein ligase 1	207	2777	NKTDAAEYHK	1×DSSO [K2]	KEKEHK	1×DSSO [K3]	69.64	16.31	1	TRUE	A8J1G8	A0A2K3E5J0	translation [GO:0006412]	ribosome [GO:0005840]	structural constituent of ribosome [GO:0003735]	positive regulation of protein catabolic process [GO:0045732]; proteasome-mediated ubiquitin-dependent protein catabolic process [GO:0043161]; protein polyubiquitination [GO:0000209]; protein ubiquitination [GO:0016567]	cytoplasm [GO:0005737]	ubiquitin protein ligase activity [GO:0061630]	20210409_ALS_XL_F64.raw	7562
Intra	Cre12.g552200.t1.2	Cre12.g552200.t1.2	Starch phosphorylase	Starch phosphorylase	175	1004	FENTAATGGTGKAR	1×DSSO [K12]	SKSKPASS	1×DSSO [K2]	68.85	68.85	1	TRUE	A8IYK1	A8IYK1	glycogen catabolic process [GO:0005980]	cytoplasm [GO:0005737]	glycogen phosphorylase activity [GO:0008184]; linear malto-oligosaccharide phosphorylase activity [GO:0102250]; pyridoxal phosphate binding [GO:0030170]; SHG alpha-glucan phosphorylase activity [GO:0102499]	glycogen catabolic process [GO:0005980]	cytoplasm [GO:0005737]	glycogen phosphorylase activity [GO:0008184]; linear malto-oligosaccharide phosphorylase activity [GO:0102250]; pyridoxal phosphate binding [GO:0030170]; SHG alpha-glucan phosphorylase activity [GO:0102499]	20210409_ALS_XL_F56.raw	7950
Intra	Cre16.g672300.t1.2	Cre16.g672300.t1.2	High mobility group protein	High mobility group protein	133	56	RAEVLAAKK	1×DSSO [K8]	APKVEKPK	1×DSSO [K3]	68.81	13.2	1	TRUE	A8J3F0	A8J3F0	NA	nucleus [GO:0005634]	DNA binding, bending [GO:0008301]	NA	nucleus [GO:0005634]	DNA binding, bending [GO:0008301]	20210409_ALS_XL_F64.raw	11851
Inter	Cre12.g519180.t2.1	Cre06.g278181.t2.1	Elongation factor Ts-like protein	Integrase-type DNA-binding superfamily protein	692	1004	EVEMGKEDLANKPEAIR	1×DSSO [K12]	KMKPR	1×Oxidation [M2]; 1×DSSO [K3]	68.6	68.6	1	FALSE	A8J637	A0A2K3DP41	response to light stimulus [GO:0009416]	chloroplast [GO:0009507]; chloroplast ribosome [GO:0043253]; mitochondrion [GO:0005739]	mRNA binding [GO:0003729]; polysome binding [GO:1905538]; translation elongation factor activity [GO:0003746]; translation elongation factor binding [GO:0061770]	NA	nucleus [GO:0005634]	DNA binding [GO:0003677]; DNA-binding transcription factor activity [GO:0003700]	20210409_ALS_XL_F59.raw	24148
Intra	Cre11.g482483.t2.1	Cre11.g482483.t2.1	RNA helicase, ATP-dependent, SK12/DOB1 protein	RNA helicase, ATP-dependent, SK12/DOB1 protein	424	413	AAGGGAGGGKAAAGGGGK	1×DSSO [K10]	RDQKR	1×DSSO [K4]	68.6	20.68	1	FALSE	A0A2K3D8U8	A0A2K3D8U8	NA	NA	ATP binding [GO:0005524]; hydrolase activity [GO:0016787]; nucleic acid binding [GO:0003676]	NA	NA	ATP binding [GO:0005524]; hydrolase activity [GO:0016787]; nucleic acid binding [GO:0003676]	20210409_ALS_XL_F62.raw	3985
Intra	Cre06.g262900.t1.2	Cre06.g262900.t1.2	Phosphofructokinase	Phosphofructokinase	440	436	HFKGEADIK	1×DSSO [K3]	NEFKK	1×DSSO [K4]	68.6	27.66	1	TRUE	A8HX70	A8HX70	fructose 6-phosphate metabolic process [GO:0006002]	cytoplasm [GO:0005737]	6-phosphofructokinase activity [GO:0003872]; metal ion binding [GO:0046872]	fructose 6-phosphate metabolic process [GO:0006002]	cytoplasm [GO:0005737]	6-phosphofructokinase activity [GO:0003872]; metal ion binding [GO:0046872]	20210409_ALS_XL_F64.raw	17315
Intra	Cre10.g452450.t1.2	Cre10.g452450.t1.2	110 kDa translocon at the inner membrane of chloroplasts	110 kDa translocon at the inner membrane of chloroplasts	845	893	ETGDKVLKTAR	1×DSSO [K8]	KEVIKK	1×DSSO [K1]	68.38	5.32	1	TRUE	A0A2K3DB95	A0A2K3DB95	protein import into chloroplast stroma [GO:0045037]	TOC-TIC supercomplex I [GO:0061927]	NA	protein import into chloroplast stroma [GO:0045037]	TOC-TIC supercomplex I [GO:0061927]	NA	20210409_ALS_XL_F64.raw	12607
Intra	Cre06.g275900.t1.2	Cre06.g275900.t1.2	Histone H1	Histone H1	1	16	ADVAAPAPAK	1×DSSO [A1]	SPAAKK	1×DSSO [K5]	68.37	22.47	1	FALSE	Q39576	Q39576	chromosome condensation [GO:0030261]; negative regulation of chromatin silencing [GO:0031936]; negative regulation of DNA recombination [GO:0045910]; nucleosome assembly [GO:0006334]; nucleosome positioning [GO:0016584]	nucleosome [GO:0000786]; nucleus [GO:0005634]	double-stranded DNA binding [GO:0003690]; nucleosomal DNA binding [GO:0031492]	chromosome condensation [GO:0030261]; negative regulation of chromatin silencing [GO:0031936]; negative regulation of DNA recombination [GO:0045910]; nucleosome assembly [GO:0006334]; nucleosome positioning [GO:0016584]	nucleosome [GO:0000786]; nucleus [GO:0005634]	double-stranded DNA binding [GO:0003690]; nucleosomal DNA binding [GO:0031492]	20210409_ALS_XL_F40.raw	10263
Inter	Cre02.g075700.t1.2	Cre09.g388726.t2.1	Cytosolic 80S ribosomal protein L19	phosphoesterase	153	146	VREKTIADQFEAR	1×DSSO [K4]	GKAAEK	1×DSSO [K2]	68.37	13.2	1	FALSE	A8IA18	A0A2K3DDZ0	translation [GO:0006412]	cytosolic large ribosomal subunit [GO:0022625]	RNA binding [GO:0003723]; structural constituent of ribosome [GO:0003735]	DNA repair [GO:0006281]; nucleotide phosphorylation [GO:0046939]	NA	ATP-dependent polydeoxyribonucleotide 5'-hydroxyl-kinase activity [GO:0046404]; double-stranded DNA binding [GO:0003690]; polynucleotide 3'-phosphatase activity [GO:0046403]	20210409_ALS_XL_F61.raw	18234
Intra	Cre07.g356600.t1.2	Cre07.g356600.t1.2	(1 of 1) PTHR13096 - MINA53 MYC INDUCED NUCLEAR ANTIGEN	(1 of 1) PTHR13096 - MINA53 MYC INDUCED NUCLEAR ANTIGEN	700	694	TKEEEPAKK	1×DSSO [K2]	EAKKAEPK	1×DSSO [K4]	67.89	67.89	1	TRUE	A0A2K3DLP9	A0A2K3DLP9	histone H3-K36 demethylation [GO:0070544]; histone H3-K4 demethylation [GO:0034720]	nucleolus [GO:0005730]	2-oxoglutarate-dependent dioxygenase activity [GO:0016706]; histone demethylase activity (H3-K36 specific) [GO:0051864]; histone demethylase activity (H3-K4 specific) [GO:0032453]; iron ion binding [GO:0005506]	histone H3-K36 demethylation [GO:0070544]; histone H3-K4 demethylation [GO:0034720]	nucleolus [GO:0005730]	2-oxoglutarate-dependent dioxygenase activity [GO:0016706]; histone demethylase activity (H3-K36 specific) [GO:0051864]; histone demethylase activity (H3-K4 specific) [GO:0032453]; iron ion binding [GO:0005506]	20210409_ALS_XL_F63.raw	3880
Inter	Cre14.g613400.t1.2	Cre09.g411100.t1.2	Centriole proteome protein	Cytosolic 80S ribosomal protein S10	240	94	KSLSGASAGGAGPAK	1×DSSO [K1]	KSNRPLER	1×DSSO [K1]	67.88	15.47	1	TRUE	A8JAN3	A8J4Q3	NA	centriole [GO:0005814]; cytoplasm [GO:0005737]	NA	ribosomal small subunit assembly [GO:0000028]	cytosolic small ribosomal subunit [GO:0022627]	RNA binding [GO:0003723]; structural constituent of ribosome [GO:0003735]	20210409_ALS_XL_F67.raw	14098
Inter	Cre09.g391097.t2.1	Cre12.g494400.t1.2	Cytosolic 80S ribosomal protein L4	ATP-binding protein, MRP/NBP35 family	138	404	AAAGPQKAAPK	1×DSSO [K7]	AAAAK	1×DSSO [K5]	67.85	45.12	2	FALSE	A8J1A3	A0A2K3D1T4	NA	ribosome [GO:0005840]	NA	iron-sulfur cluster assembly [GO:0016226]	cytosol [GO:0005829]	4 iron, 4 sulfur cluster binding [GO:0051539]; ATPase activity [GO:0016887]; ATP binding [GO:0005524]; iron-sulfur cluster binding [GO:0051536]; metal ion binding [GO:0046872]; protein homodimerization activity [GO:0042803]	20210409_ALS_XL_F40.raw	7625
Intra	Cre06.g275100.t1.2	Cre06.g275100.t1.2	Nucleolin	Nucleolin	10	1	ATGKELK	1×DSSO [K4]	GKPVK	1×DSSO [G1]	67.85	67.85	2	FALSE	A0A2K3DNK6	A0A2K3DNK6	NA	ribonucleoprotein complex [GO:1990904]	RNA binding [GO:0003723]	NA	ribonucleoprotein complex [GO:1990904]	RNA binding [GO:0003723]	20210409_ALS_XL_F57.raw	6609
Intra	Cre02.g075700.t1.2	Cre02.g075700.t1.2	Cytosolic 80S ribosomal protein L19	Cytosolic 80S ribosomal protein L19	153	146	VREKTIADQFEAR	1×DSSO [K4]	QKAEK	1×DSSO [K2]	67.85	6.92	1	TRUE	A8IA18	A8IA18	translation [GO:0006412]	cytosolic large ribosomal subunit [GO:0022625]	RNA binding [GO:0003723]; structural constituent of ribosome [GO:0003735]	translation [GO:0006412]	cytosolic large ribosomal subunit [GO:0022625]	RNA binding [GO:0003723]; structural constituent of ribosome [GO:0003735]	20210409_ALS_XL_F61.raw	18138
Inter	Cre13.g568900.t1.2	Cre12.g489153.t1.1	Cytosolic 80S ribosomal protein L17	Cytosolic 80S ribosomal protein L31	55	89	YLEDVIAHKR	1×DSSO [K9]	KFASK	1×DSSO [K1]	67.85	14.14	1	TRUE	A8HS59	A0A2K3D279	cytoplasmic translation [GO:0002181]	cytosolic large ribosomal subunit [GO:0022625]	structural constituent of ribosome [GO:0003735]	cytoplasmic translation [GO:0002181]	cytosolic large ribosomal subunit [GO:0022625]	structural constituent of ribosome [GO:0003735]	20210409_ALS_XL_F61.raw	23769
Intra	Cre09.g400650.t1.2	Cre09.g400650.t1.2	Cytosolic 80S ribosomal protein S6	Cytosolic 80S ribosomal protein S6	215	222	NKTDAAEYHKLLMQR	1×Oxidation [M13]; 1×DSSO [K10]	LKEQR	1×DSSO [K2]	67.85	9.69	3	FALSE	A8J1G8	A8J1G8	translation [GO:0006412]	ribosome [GO:0005840]	structural constituent of ribosome [GO:0003735]	translation [GO:0006412]	ribosome [GO:0005840]	structural constituent of ribosome [GO:0003735]	20210409_ALS_XL_F65.raw	18593
Inter	Cre06.g306300.t1.2	Cre08.g384390.t1.1	Magnesium chelatase subunit I, isoform 1	DNA polymerase theta	70	1289	AAEGRTEKELGQARPIFPFTAIVGQDEMK	1×Oxidation [M28]; 1×DSSO [K8]	GEKVEK	1×DSSO [K3]	67.8	13.14	4	TRUE	A8IMZ5	A0A2K3DIB3	chlorophyll biosynthetic process [GO:0015995]; photosynthesis [GO:0015979]	chloroplast stroma [GO:0009570]	ATP binding [GO:0005524]; magnesium chelatase activity [GO:0016851]	RNA catabolic process [GO:0006401]	NA	ATP binding [GO:0005524]; nucleic acid binding [GO:0003676]; RNA helicase activity [GO:0003724]	20210409_ALS_XL_F45.raw	41187
Intra	Cre06.g261450.t1.2	Cre06.g261450.t1.2	High mobility group protein	High mobility group protein	137	149	EMESYGGSSGASKKPAAK	1×Oxidation [M2]; 1×DSSO [K14]	AAPKKK	1×DSSO [K5]	67.8	67.8	1	TRUE	A8HXE1	A8HXE1	NA	nucleus [GO:0005634]	DNA binding, bending [GO:0008301]	NA	nucleus [GO:0005634]	DNA binding, bending [GO:0008301]	20210409_ALS_XL_F61.raw	5166
Intra	Cre02.g080700.t1.2	Cre02.g080700.t1.2	Endoplasmic reticulum associated Hsp70 protein	Endoplasmic reticulum associated Hsp70 protein	336	343	ARFEELNMDLFKK	1×Oxidation [M8]; 1×DSSO [K12]	TMGPVKK	1×Oxidation [M2]; 1×DSSO [K6]	67.76	33.04	2	FALSE	A8I7T8	A8I7T8	cellular response to unfolded protein [GO:0034620]; chaperone cofactor-dependent protein refolding [GO:0051085]; endoplasmic reticulum unfolded protein response [GO:0030968]; protein refolding [GO:0042026]; ubiquitin-dependent ERAD pathway [GO:0030433]	cytoplasm [GO:0005737]; endoplasmic reticulum chaperone complex [GO:0034663]; endoplasmic reticulum lumen [GO:0005788]; membrane [GO:0016020]; nucleus [GO:0005634]	ATPase activity [GO:0016887]; ATP binding [GO:0005524]; heat shock protein binding [GO:0031072]; misfolded protein binding [GO:0051787]; protein folding chaperone [GO:0044183]; unfolded protein binding [GO:0051082]	cellular response to unfolded protein [GO:0034620]; chaperone cofactor-dependent protein refolding [GO:0051085]; endoplasmic reticulum unfolded protein response [GO:0030968]; protein refolding [GO:0042026]; ubiquitin-dependent ERAD pathway [GO:0030433]	cytoplasm [GO:0005737]; endoplasmic reticulum chaperone complex [GO:0034663]; endoplasmic reticulum lumen [GO:0005788]; membrane [GO:0016020]; nucleus [GO:0005634]	ATPase activity [GO:0016887]; ATP binding [GO:0005524]; heat shock protein binding [GO:0031072]; misfolded protein binding [GO:0051787]; protein folding chaperone [GO:0044183]; unfolded protein binding [GO:0051082]	20210409_ALS_XL_F59.raw	29888
Inter	Cre09.g397697.t1.1	Cre12.g537800.t1.2	Ribosomal protein L4	Cytosolic 80S ribosomal protein L7	363	57	GEKTGGQKDK	1×DSSO [K3]	TQEKDIVR	1×DSSO [K4]	67.76	10.87	1	TRUE	A8J0I0	A0A2K3D598	translation [GO:0006412]	cytosolic large ribosomal subunit [GO:0022625]	RNA binding [GO:0003723]; structural constituent of ribosome [GO:0003735]	maturation of LSU-rRNA from tricistronic rRNA transcript (SSU-rRNA, 5.8S rRNA, LSU-rRNA) [GO:0000463]	cytosolic large ribosomal subunit [GO:0022625]	RNA binding [GO:0003723]; structural constituent of ribosome [GO:0003735]	20210409_ALS_XL_F60.raw	8010
Intra	Cre06.g278125.t1.1	Cre06.g278125.t1.1	kinesin-like calmodulin-binding protein (ZWICHEL)	kinesin-like calmodulin-binding protein (ZWICHEL)	737	728	IEKAKETETTELR	1×DSSO [K5]	EKELIEKK	1×DSSO [K7]	67.76	67.76	1	TRUE	A0A2K3DNX1	A0A2K3DNX1	microtubule-based movement [GO:0007018]	cytoplasm [GO:0005737]; kinesin complex [GO:0005871]; microtubule [GO:0005874]	ATPase activity [GO:0016887]; ATP binding [GO:0005524]; ATP-dependent microtubule motor activity [GO:1990939]; microtubule binding [GO:0008017]; microtubule motor activity [GO:0003777]	microtubule-based movement [GO:0007018]	cytoplasm [GO:0005737]; kinesin complex [GO:0005871]; microtubule [GO:0005874]	ATPase activity [GO:0016887]; ATP binding [GO:0005524]; ATP-dependent microtubule motor activity [GO:1990939]; microtubule binding [GO:0008017]; microtubule motor activity [GO:0003777]	20210409_ALS_XL_F62.raw	17865
Inter	gi|41179034|ref|NP_958390.1|	gi|41179035|ref|NP_958391.1|	ribosomal protein S2 (chloroplast)	ribosomal protein S2 (chloroplast)	330	1013	YLGGISNMTKIKEK	1×Oxidation [M8]; 1×DSSO [K12]	IRPILKEK	1×DSSO [K6]	67.76	67.76	1	TRUE	Q8HUH1	O47027	translation [GO:0006412]	chloroplast [GO:0009507]; mitochondrial small ribosomal subunit [GO:0005763]	structural constituent of ribosome [GO:0003735]	translation [GO:0006412]	chloroplast [GO:0009507]; mitochondrial small ribosomal subunit [GO:0005763]	structural constituent of ribosome [GO:0003735]	20210409_ALS_XL_F63.raw	23731
Inter	Cre06.g261450.t1.2	Cre03.g178950.t1.2	High mobility group protein	DEAD/DEAH box helicase	54	966	KAKDPNAPK	1×DSSO [K1]	AKALVAAGAK	1×DSSO [K2]	67.74	67.74	1	TRUE	A8HXE1	A0A2K3DXL1	NA	nucleus [GO:0005634]	DNA binding, bending [GO:0008301]	DNA duplex unwinding [GO:0032508]; DNA recombination [GO:0006310]; DNA repair [GO:0006281]; DNA unwinding involved in DNA replication [GO:0006268]; double-strand break repair via homologous recombination [GO:0000724]	chromosome [GO:0005694]; cytoplasm [GO:0005737]; nucleus [GO:0005634]	3'-5' DNA helicase activity [GO:0043138]; ATP binding [GO:0005524]; four-way junction helicase activity [GO:0009378]; nucleic acid binding [GO:0003676]	20210409_ALS_XL_F67.raw	3216
Inter	Cre17.g720250.t1.2	Cre07.g329450.t1.2	Light-harvesting minor chlorophyll a/b binding protein of photosystem II	None	4	170	VFKFPTPPGTQK	1×Acetyl [V1]; 1×DSSO [K3]	KAAIEQQVR	1×DSSO [K1]	67.62	24.62	2	TRUE	A8J6D1	A8IHC8	photosynthesis, light harvesting in photosystem I [GO:0009768]; protein-chromophore linkage [GO:0018298]; response to light stimulus [GO:0009416]	chloroplast envelope [GO:0009941]; chloroplast thylakoid membrane [GO:0009535]; photosystem I [GO:0009522]; photosystem II [GO:0009523]; plastoglobule [GO:0010287]	chlorophyll binding [GO:0016168]	NA	NA	NA	20210409_ALS_XL_F35.raw	32159
Intra	Cre17.g708300.t1.2	Cre17.g708300.t1.2	26S proteasome regulatory subunit	26S proteasome regulatory subunit	33	73	DLSTADSLLGQLKVK	1×DSSO [K13]	KQDEAAMER	1×Oxidation [M7]; 1×DSSO [K1]	67.62	42.78	1	TRUE	A0A2K3CPH2	A0A2K3CPH2	proteasome-mediated ubiquitin-dependent protein catabolic process [GO:0043161]	cytosol [GO:0005829]; nucleus [GO:0005634]; proteasome regulatory particle, lid subcomplex [GO:0008541]	NA	proteasome-mediated ubiquitin-dependent protein catabolic process [GO:0043161]	cytosol [GO:0005829]; nucleus [GO:0005634]; proteasome regulatory particle, lid subcomplex [GO:0008541]	NA	20210409_ALS_XL_F52.raw	38452
Inter	Cre09.g387578.t1.1	Cre07.g325600.t1.1	Zinc-finger domain of monoamine-oxidase A repressor R1	Glutaredoxin, CGFS type	38	160	AAAEEKSAAVGPK	1×DSSO [K6]	EQAAAAKK	1×DSSO [K7]	67.41	4.57	1	TRUE	A0A2K3DDV1	A0A2K3DJC9	regulation of transcription, DNA-templated [GO:0006355]	cytoplasm [GO:0005737]; nucleus [GO:0005634]	NA	NA	mitochondrial matrix [GO:0005759]	iron-sulfur cluster binding [GO:0051536]; metal ion binding [GO:0046872]; protein disulfide oxidoreductase activity [GO:0015035]	20210409_ALS_XL_F40.raw	19368
Intra	Cre03.g185500.t1.1	Cre03.g185500.t1.1	Diphosphoinositol Pentakisphosphate Kinase	Diphosphoinositol Pentakisphosphate Kinase	1549	1556	AVDKEAKEK	1×DSSO [K7]	EAKEKETK	1×DSSO [K5]	67.41	67.41	1	TRUE	A0A2K3DY21	A0A2K3DY21	inositol metabolic process [GO:0006020]; inositol phosphate biosynthetic process [GO:0032958]	cytosol [GO:0005829]	5-diphosphoinositol pentakisphosphate 3-kinase activity [GO:0102092]; ATP binding [GO:0005524]; diphosphoinositol-pentakisphosphate kinase activity [GO:0033857]; inositol-1,3,4,5,6-pentakisphosphate kinase activity [GO:0000827]; inositol heptakisphosphate kinase activity [GO:0000829]; inositol hexakisphosphate 1-kinase activity [GO:0052723]; inositol hexakisphosphate 3-kinase activity [GO:0052724…	inositol metabolic process [GO:0006020]; inositol phosphate biosynthetic process [GO:0032958]	cytosol [GO:0005829]	5-diphosphoinositol pentakisphosphate 3-kinase activity [GO:0102092]; ATP binding [GO:0005524]; diphosphoinositol-pentakisphosphate kinase activity [GO:0033857]; inositol-1,3,4,5,6-pentakisphosphate kinase activity [GO:0000827]; inositol heptakisphosphate kinase activity [GO:0000829]; inositol hexakisphosphate 1-kinase activity [GO:0052723]; inositol hexakisphosphate 3-kinase activity [GO:0052724…	20210409_ALS_XL_F65.raw	3878
Inter	Cre12.g537800.t1.2	Cre13.g579050.t1.2	Cytosolic 80S ribosomal protein L7	Chlamydomonas specific family protein	11	174	STVVPELLAKKR	1×Acetyl [S1]; 1×DSSO [K10]	QEQAGGSAKKR	1×DSSO [K9]	67.34	67.34	1	TRUE	A0A2K3D598	A0A2K3D092	maturation of LSU-rRNA from tricistronic rRNA transcript (SSU-rRNA, 5.8S rRNA, LSU-rRNA) [GO:0000463]	cytosolic large ribosomal subunit [GO:0022625]	RNA binding [GO:0003723]; structural constituent of ribosome [GO:0003735]	NA	NA	NA	20210409_ALS_XL_F63.raw	26243
Inter	Cre08.g382500.t1.2	Cre02.g097400.t1.2	Cytosolic 80S ribosomal protein S25	Eukaryotic initiation factor, eIF-5A	21	163	ALAAANSSKGK	1×DSSO [K9]	VVNDKAA	1×DSSO [K5]	67.33	29.01	1	TRUE	A8IZ36	A8I297	NA	cytosolic small ribosomal subunit [GO:0022627]	structural constituent of ribosome [GO:0003735]	positive regulation of translational elongation [GO:0045901]; positive regulation of translational termination [GO:0045905]	NA	ribosome binding [GO:0043022]; translation elongation factor activity [GO:0003746]; translation initiation factor activity [GO:0003743]	20210409_ALS_XL_F41.raw	9762
Intra	Cre12.g495650.t1.2	Cre12.g495650.t1.2	(1 of 2) PTHR19847 - WD40 REPEAT PROTEIN	(1 of 2) PTHR19847 - WD40 REPEAT PROTEIN	180	173	VLKALTR	1×DSSO [K3]	DKLVPR	1×DSSO [K2]	67.33	36.3	1	TRUE	A0A2K3D224	A0A2K3D224	proteasome-mediated ubiquitin-dependent protein catabolic process [GO:0043161]	Cul4-RING E3 ubiquitin ligase complex [GO:0080008]	NA	proteasome-mediated ubiquitin-dependent protein catabolic process [GO:0043161]	Cul4-RING E3 ubiquitin ligase complex [GO:0080008]	NA	20210409_ALS_XL_F56.raw	22626
Inter	Cre09.g393358.t1.1	Cre07.g349100.t1.1	Hyaluronan / mRNA binding family	ATP-dependent RNA helicase	261	490	AAKEAAAASK	1×DSSO [K3]	KKEAEAR	1×DSSO [K1]	67.33	67.33	1	TRUE	A8J087	A0A2K3DL77	NA	cytoplasm [GO:0005737]; nucleus [GO:0005634]	RNA binding [GO:0003723]	NA	NA	ATP binding [GO:0005524]; RNA binding [GO:0003723]; RNA helicase activity [GO:0003724]	20210409_ALS_XL_F60.raw	4244
Inter	Cre08.g359350.t1.2	Cre03.g192550.t1.1	Biotin carboxylase	DNA repair protein	158	615	LMGDKSTAR	1×DSSO [K5]	LKAEEAAR	1×DSSO [K2]	67.06	9.55	1	TRUE	A0A2K3DGE7	A0A2K3DYE8	fatty acid biosynthetic process [GO:0006633]; malonyl-CoA biosynthetic process [GO:2001295]	NA	acetyl-CoA carboxylase activity [GO:0003989]; ATP binding [GO:0005524]; biotin carboxylase activity [GO:0004075]; metal ion binding [GO:0046872]	chromosome organization involved in meiotic cell cycle [GO:0070192]; DNA duplex unwinding [GO:0032508]; double-strand break repair [GO:0006302]; nucleic acid phosphodiester bond hydrolysis [GO:0090305]; telomere maintenance via recombination [GO:0000722]; telomere maintenance via telomerase [GO:0007004]	condensed nuclear chromosome [GO:0000794]; Mre11 complex [GO:0030870]	ATPase activity [GO:0016887]; double-stranded telomeric DNA binding [GO:0003691]; G-quadruplex DNA binding [GO:0051880]; single-stranded telomeric DNA binding [GO:0043047]	20210409_ALS_XL_F56.raw	10601
Inter	Cre12.g505850.t1.2	Cre13.g574150.t1.1	Chaperonin 23	FAD-dependent oxidoreductase	69	130	GGILLPPSAIKKPTSGEVVQLGDGR	1×DSSO [K12]	ARLCVEGKAR	1×Carbamidomethyl [C4]; 1×DSSO [K8]	67.03	67.03	1	TRUE	A8IJY7	A0A2K3CZW2	chaperone cofactor-dependent protein refolding [GO:0051085]	chloroplast [GO:0009507]; mitochondrial matrix [GO:0005759]; plastid [GO:0009536]	ATPase activity [GO:0016887]; ATP binding [GO:0005524]; chaperone binding [GO:0051087]; metal ion binding [GO:0046872]; unfolded protein binding [GO:0051082]	NA	mitochondrion [GO:0005739]	(S)-2-hydroxy-acid oxidase activity [GO:0003973]; 2-hydroxyglutarate dehydrogenase activity [GO:0047545]	20210409_ALS_XL_F42.raw	41925
Inter	Cre01.g011000.t1.2	Cre10.g459250.t1.2	Cytosolic 80S ribosomal protein L6	Cytosolic 80S ribosomal protein L35a	222	40	DGDRPHLMKF	1×Oxidation [M8]; 1×DSSO [K9]	KEVAWYLGK	1×DSSO [K1]	67.03	19.29	1	TRUE	A8HP90	A8I0Y2	cytoplasmic translation [GO:0002181]; ribosomal large subunit assembly [GO:0000027]	cytosolic large ribosomal subunit [GO:0022625]	RNA binding [GO:0003723]; structural constituent of ribosome [GO:0003735]	cytoplasmic translation [GO:0002181]; ribosomal large subunit biogenesis [GO:0042273]	cytosolic large ribosomal subunit [GO:0022625]	structural constituent of ribosome [GO:0003735]	20210409_ALS_XL_F60.raw	35725
Intra	Cre03.g200991.t1.1	Cre03.g200991.t1.1	CDK inhibitor P21 binding protein	CDK inhibitor P21 binding protein	449	458	AAAGQGAAGGKGK	1×DSSO [K11]	GAGGKAGGSGR	1×DSSO [K5]	66.99	30.53	1	TRUE	A0A2K3DZK3	A0A2K3DZK3	NA	nucleus [GO:0005634]	NA	NA	nucleus [GO:0005634]	NA	20210409_ALS_XL_F56.raw	4104
Intra	Cre05.g248100.t1.2	Cre05.g248100.t1.2	Predicted protein with ankyrin repeats	Predicted protein with ankyrin repeats	422	434	AAANRDGKTAADLAK	1×DSSO [K8]	TPELKELLS	1×DSSO [K5]	66.96	15.2	1	TRUE	A0A2K3DS08	A0A2K3DS08	NA	NA	NA	NA	NA	NA	20210409_ALS_XL_F55.raw	31875
Intra	Cre06.g308450.t1.2	Cre06.g308450.t1.2	(1 of 1) PTHR35299:SF2 - RUBISCO ACCUMULATION FACTOR 1, CHLOROPLASTIC-RELATED	(1 of 1) PTHR35299:SF2 - RUBISCO ACCUMULATION FACTOR 1, CHLOROPLASTIC-RELATED	445	203	AKAQELDKR	1×DSSO [K2]	SMKEYER	1×Oxidation [M2]; 1×DSSO [K3]	66.96	28.98	1	TRUE	A0A2K3DRH6	A0A2K3DRH6	NA	NA	NA	NA	NA	NA	20210409_ALS_XL_F61.raw	10209
[truncated: 79 more rows]

## Sheet: Table S2 - Cr Linear Peptides
Table S2. Identified non-crosslinked peptides in C. reinhardtii.
Confidence	Peptide Sequence	Modifications	Protein Accession	Qvality PEP	Qvality q-value	# PSMs	# Missed Cleavages	Theo. MH+ [Da]	Percolator q-Value	Percolator PEP	Xcorr
High	VVAAEVAASVADVQSSEAVR	None	Cre06.g302850.t1.2	9.2e-05	2.7e-05	6	0	1958.02	8.39e-06	2.24e-05	5.99
[truncated: 116,085 more rows]

## Sheet: Table S3 - Cr Proteins
Table S3. Identified proteins from non-crosslinked peptides in C. reinhardtii.
[truncated: 7,483 more rows]

[truncated: 2 more sheets: Table S4 - Known Interlinks, Table S5 - Intralink Distance]
