# Supplementary material for: Crosslinking mass spectrometry unveils novel interactions and structural distinctions in the model green alga Chlamydomonas reinhardtii
Source: Royal Society of Chemistry journal article supplement (doi:10.1039/d1mo00197c), 2021-09-06
Supplement: d1mo00197c2.pdf [file d1mo00197c2.pdf]

# Crosslinking mass spectrometry unveils novel interactions and structural distinctions in the model green alga *Chlamydomonas reinhardtii*

Amanda L. Smythers<sup>1#</sup>, Anthony A. Iannetta<sup>1#</sup>, and Leslie M. Hicks<sup>1\*</sup>

## Affiliations

<sup>1</sup>Department of Chemistry, University of North Carolina at Chapel Hill, Chapel Hill, NC, USA

# denotes equal contributions

\*Dr. Leslie M. Hicks, Department of Chemistry, University of North Carolina at Chapel Hill, Kenan Laboratories, 125 South Road, CB#3290, Chapel Hill, NC 27599-3290, United States

## Supplemental Information

**Supplementary Information 1.** The Proteome Discoverer processing (left) and consensus (right) workflows and corresponding settings. If parameters are not listed, the default settings were used.

## Supplemental Figures

**Figure S1.** Representative CSM showing the annotated MS2 spectrum of the interlink between K157 of cytosolic 80S ribosomal protein S27a (Cre06.g273600.t1.2) and K65 of cytosolic 80S ribosomal protein S15 (Cre08.g360900.t1.2). Reporter ions are labeled and shown here in blue and red.

**Figure S2.** Predicted protein structures of Elongation Factor 3 and ABC transporter (Cre04.g222700.t1.2) using I-TASSER incorporating all detected intralinks. The top 5 structures with mapped intralinks are shown and all crosslinks had measured distances within the maximum restraint for DSSO (in green).

**Figure S3.** Predicted protein structure of Mg-chelatase (Cre06.g306300.t1.2) using I-TASSER incorporating all detected intralinks. The top structure with mapped intralinks is shown and all crosslinks had measured distances within the maximum restraint for DSSO (in green).

**Figure S4.** Preliminary complex modeling between Mg-chelatase (Cre06.g306300.t1.2, teal) and MCAP (Cre11.g477733.t1.2, orange) using I-TASSER and HADDOCK incorporating all detected interlinks. The top structures from each cluster with mapped interlinks are shown and ordered by the number of interlinks that had measured distances within the maximum restraint for DSSO (in green).

**Figure S5.** Refined complex modeling between Mg-chelatase (Cre06.g306300.t1.2, teal) and MCAP (Cre11.g477733.t1.2, orange) using I-TASSER and HADDOCK incorporating compatible interlinks from the first structure in Figure S4. The top structures from each cluster with mapped interlinks are shown and ordered by the number of interlinks that had measured distances within the maximum restraint for DSSO (in green).

**Supplementary Information 1.** The Proteome Discoverer processing (left) and consensus (right) workflows and corresponding settings. If parameters are not listed, the default settings were used.

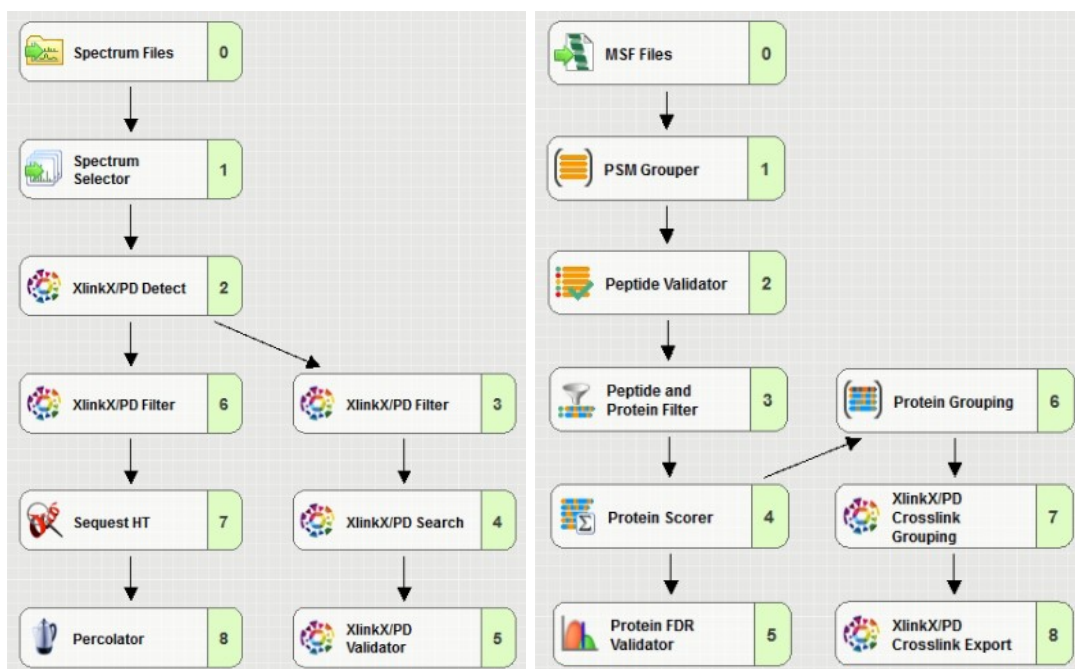

### Processing Workflow Settings

#### Spectrum Selector (1)

|                                           |                                    |
|-------------------------------------------|------------------------------------|
| Precursor Selection                       | Use MS(n-1) with Parent Precursors |
| Min. Precursor Mass                       | 350 Da                             |
| Max. Precursor Mass                       | 10000 Da                           |
| Unrecognized Activation Type Replacements | HCD                                |

#### XlinkX/PD Detect (2)

|                           |                        |
|---------------------------|------------------------|
| Acquisition strategy      | MS2                    |
| Crosslink Modification    | DSSO / +158.004 Da (K) |
| Enable protein N-terminus | True                   |

#### XlinkX/PD Filter (3)

|        |            |
|--------|------------|
| Select | Crosslinks |
|--------|------------|

#### XlinkX/PD Search (4)

|             |                |
|-------------|----------------|
| Enzyme Name | Trypsin (Full) |
|-------------|----------------|

|                                     |                                  |
|-------------------------------------|----------------------------------|
| Maximum Missed Cleavages            | 2                                |
| Precursor Mass Tolerance            | 15 ppm                           |
| Fragment Mass Tolerance             | 0.02 Da                          |
| Static Modification                 | Carbamidomethyl / +57.021 Da (C) |
| Dynamic Modification                | Oxidation / +15.995 Da (M)       |
| Dynamic Protein N-term Modification | Acetyl / +42.011 Da (N-Terminus) |

#### XlinkX/PD Validator (5)

|               |      |
|---------------|------|
| FDR threshold | 0.01 |
|---------------|------|

#### XlinkX/PD Filter (6)

|        |          |
|--------|----------|
| Select | Peptides |
|--------|----------|

#### Sequest HT (7)

|                                      |                                                                                                |
|--------------------------------------|------------------------------------------------------------------------------------------------|
| Enzyme Name                          | Trypsin (Full)                                                                                 |
| Maximum Missed Cleavages             | 2                                                                                              |
| Precursor Mass Tolerance             | 15 ppm                                                                                         |
| Fragment Mass Tolerance              | 0.02 Da                                                                                        |
| Weight of a Ions                     | 1                                                                                              |
| Weight of b Ions                     | 1                                                                                              |
| Weight of y Ions                     | 1                                                                                              |
| Max. Equal Modifications Per Peptide | 3                                                                                              |
| Static Modification                  | Carbamidomethyl / +57.021 Da (C)                                                               |
| Dynamic Modification                 | Oxidation / +15.995 Da (M)<br>DSSO Tris / +279.078 Da (K)<br>DSSO Hydrolyzed / +176.014 Da (K) |
| Dynamic Protein N-term Modification  | Acetyl / +42.011 Da (N-Terminus)                                                               |

#### Percolator (8)

|                        |              |
|------------------------|--------------|
| Target/Decoy Selection | Concatenated |
| Target FDR (Strict)    | 0.01         |
| Target FDR (Relaxed)   | 0.05         |

#### Consensus Workflow Settings

##### MSF Files (0)

|                            |            |
|----------------------------|------------|
| Spectra to Store           | Identified |
| Reported FASTA Title Lines | Best match |

##### PSM Grouper (1)

|                            |    |
|----------------------------|----|
| Site Probability Threshold | 75 |
|----------------------------|----|

#### Peptide Validator (2)

|                                   |      |
|-----------------------------------|------|
| Target FDR (Strict) for PSMs      | 0.01 |
| Target FDR (Relaxed) for PSMs     | 0.05 |
| Target FDR (Strict) for Peptides  | 0.01 |
| Target FDR (Relaxed) for Peptides | 0.05 |

#### Peptide and Protein Filter (3)

|                                     |      |
|-------------------------------------|------|
| Peptide Confidence At Least         | High |
| Minimum Number of Peptide Sequences | 1    |

#### Protein FDR Validator (5)

|                      |      |
|----------------------|------|
| Target FDR (Strict)  | 0.01 |
| Target FDR (Relaxed) | 0.05 |

#### Protein Grouping (6)

|                                  |      |
|----------------------------------|------|
| Apply strict parsimony principle | True |
|----------------------------------|------|

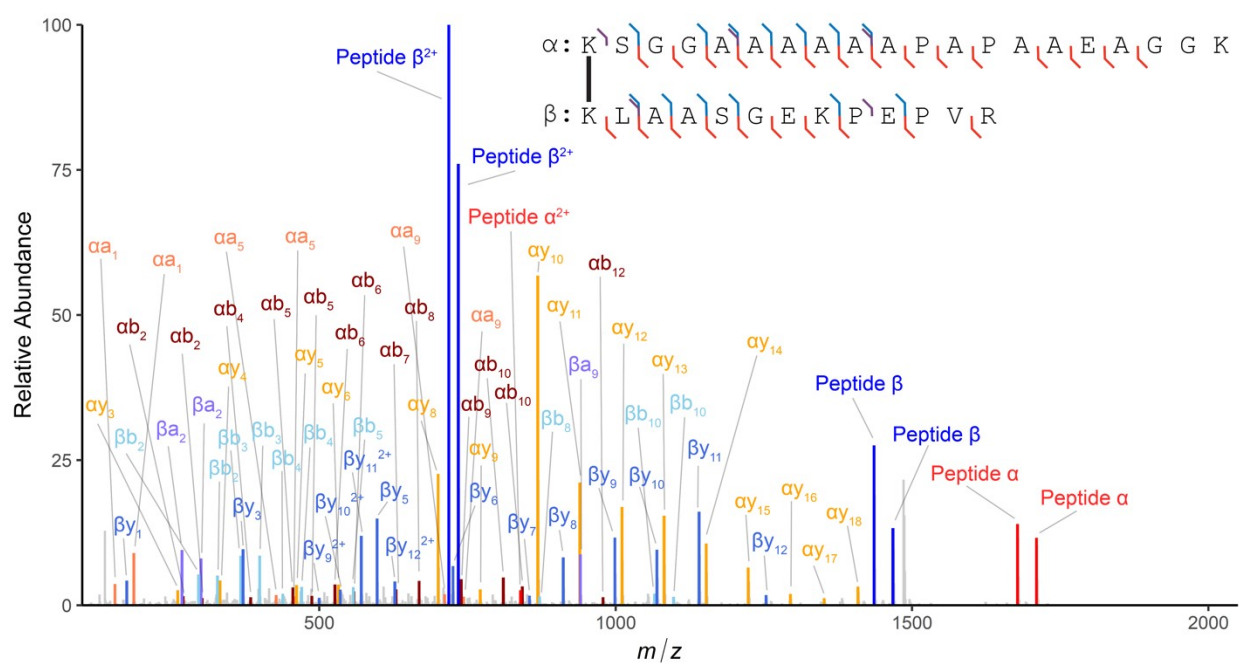

**Figure S1.** Representative CSM showing the annotated MS2 spectrum of the interlink between K157 of cytosolic 80S ribosomal protein S27a (Cre06.g273600.t1.2) and K65 of cytosolic 80S ribosomal protein S15 (Cre08.g360900.t1.2). Reporter ions are labeled and shown here in blue and red.

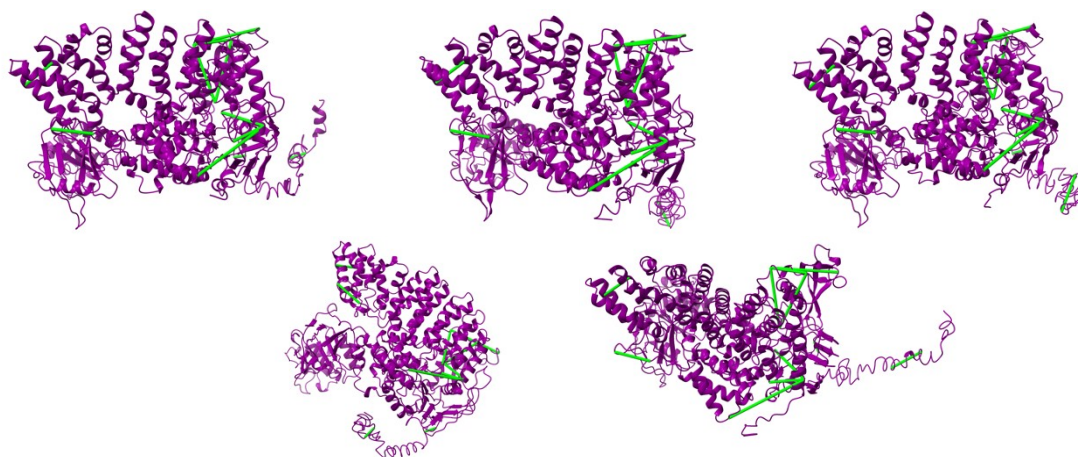

**Figure S2.** Predicted protein structures of Elongation Factor 3 and ABC transporter (Cre04.g222700.t1.2) using I-TASSER incorporating all detected intralinks. The top 5 structures with mapped intralinks are shown and all crosslinks had measured distances within the maximum restraint for DSSO (in green).

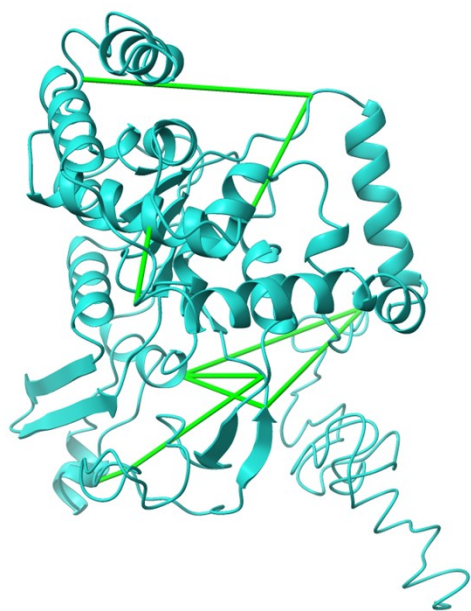

**Figure S3.** Predicted protein structure of Mg-chelatase (Cre06.g306300.t1.2) using I-TASSER incorporating all detected intralinks. The top structure with mapped intralinks is shown and all crosslinks had measured distances within the maximum restraint for DSSO (in green).

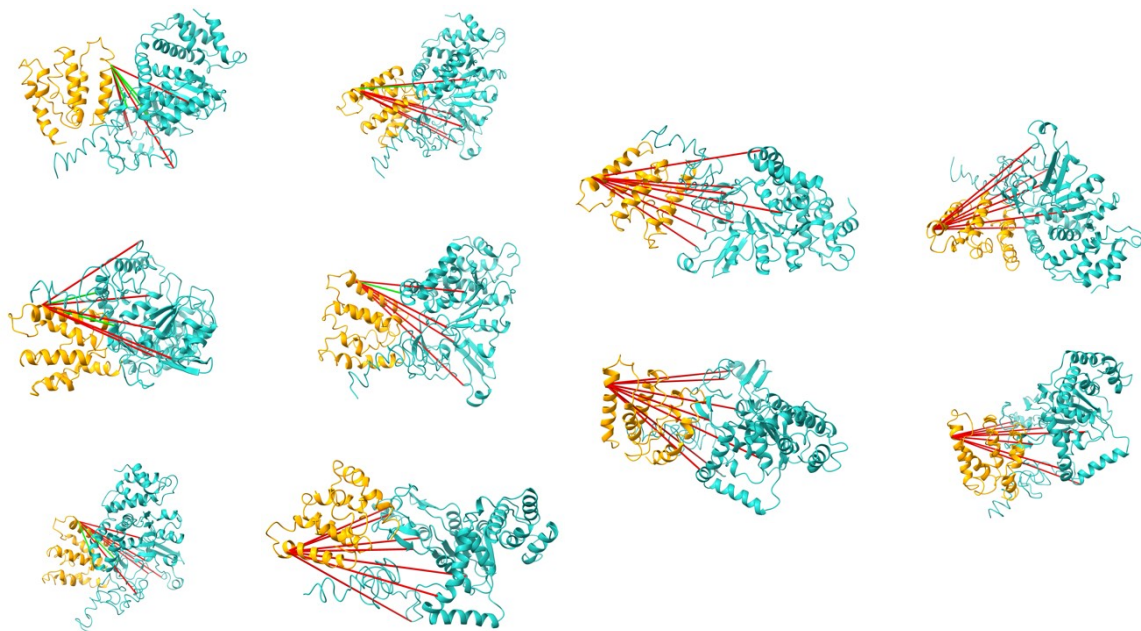

**Figure S4.** Preliminary complex modeling between Mg-chelatase (Cre06.g306300.t1.2, teal) and MCAP (Cre11.g477733.t1.2, orange) using I-TASSER and HADDOCK incorporating all detected interlinks. The top structures from each cluster with mapped interlinks are shown and ordered by the number of interlinks that had measured distances within the maximum restraint for DSSO (in green).

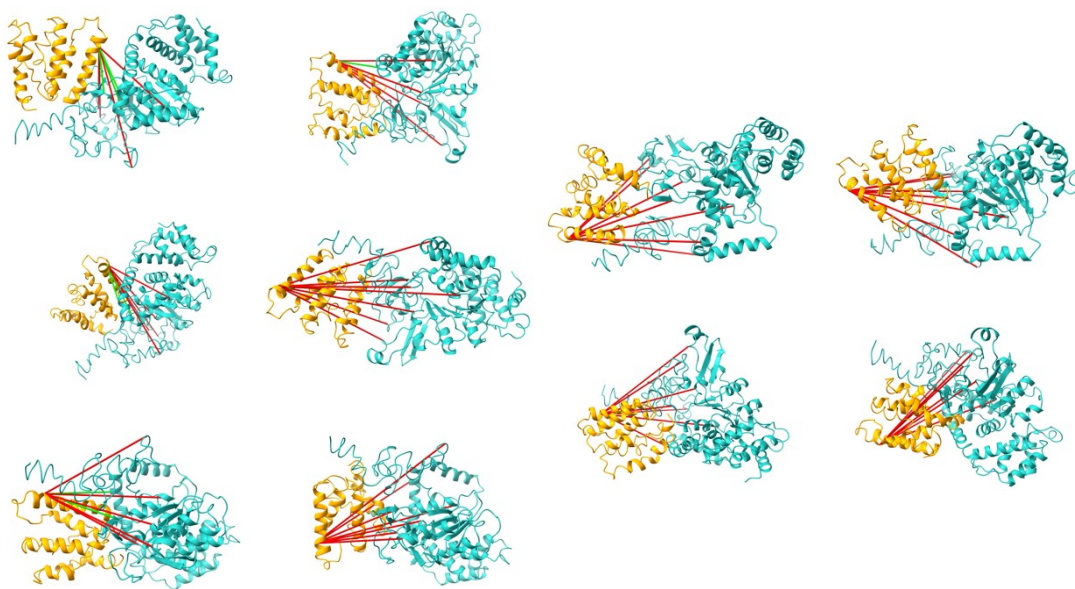

**Figure S5.** Refined complex modeling between Mg-chelatase (Cre06.g306300.t1.2, teal) and MCAP (Cre11.g477733.t1.2, orange) using I-TASSER and HADDOCK incorporating compatible interlinks from the first structure in Figure S4. The top structures from each cluster with mapped interlinks are shown and ordered by the number of interlinks that had measured distances within the maximum restraint for DSSO (in green).
